# Supplementary material for: Gold-catalyzed selective oxidation of 4-oxahepta-1,6-diynes to 2H-pyran-3(6H)-ones and chromen-3(4H)-ones via β-gold vinyl cation intermediates
Source: Royal Society of Chemistry journal article supplement (doi:10.1039/c5cc02952j), 2015-01-01

## Supporting Information

### Gold-catalyzed selective oxidation of 4-Oxahepta-1,6-diynes to 2*H*-pyran-3(6*H*)-ones and chromen-3(4*H*)-ones via the $\beta$ -gold vinyl cation intermediates

Kegong Ji,\* Xiang Liu, Bowen Du, Fang Yang, Jinming Gao

E-mail: [jikegong@nwsuaf.edu.cn](mailto:jikegong@nwsuaf.edu.cn)

| Content                                                                                                                                        | Page number |
|------------------------------------------------------------------------------------------------------------------------------------------------|-------------|
| <b>General</b>                                                                                                                                 | S2          |
| <b>Table 1 Screening conditions</b>                                                                                                            | S2-3        |
| <b>General procedure A:</b> Methods for the synthesis 4-Oxahepta-1,6-diyne derivatives                                                         | S3          |
| <b>Data of 4-Oxahepta-1,6-diyne derivatives 1</b>                                                                                              | S3-10       |
| <b>General procedure B :</b> gold catalyzed selective oxidation of 4-Oxahepta-1,6-diyne derivatives to 2 <i>H</i> -pyran-3(6 <i>H</i> )-ones 3 | S11         |
| <b>Data of 2<i>H</i>-pyran-3(6<i>H</i>)-ones 3a-3o</b>                                                                                         | S11-18      |
| <b>General procedure C:</b> gold catalyzed selective oxidation of 4-Oxahepta-1,6-diyne derivatives 1a-1ah to chromen-3(4 <i>H</i> )-ones 4     | S18         |
| <b>Data of product 4aa-4ah</b>                                                                                                                 | S18-22      |
| <b>X-ray structure of 5</b>                                                                                                                    | S23-24      |
| <b>reference</b>                                                                                                                               | S24         |
| <b>NMR</b>                                                                                                                                     | S25         |

**General** Ethyl acetate (ACS grade), hexanes (ACS grade), diethyl ether (ACS grade) and anhydrous 1, 2-dichloroethane (anhydride, 99.8%) were purchased from Fisher Scientific and used without further purification. Methylene chloride and tetrahydrofuran were purified using MBraun Solvent Purifier. Commercially available reagents were used without further purification. Reactions were monitored by thin layer chromatography (TLC) using Sorbent Technologies' pre-coated silica gel plates. Flash column chromatography was performed over Sorbent Technologies' silica gel (230-400 mesh). <sup>1</sup>H NMR and <sup>13</sup>C NMR spectra were recorded on Bruker 500 MHz spectrometers using residue solvent peaks as internal standards. Infrared spectra were recorded with a Perkin Elmer FT-IR spectrum 2000 spectro-meter and are reported in reciprocal centimeter (cm<sup>-1</sup>). Mass spectra were recorded with Micromass QTOF<sub>2</sub> Quadrupole/Time-of-Flight Tandem mass spectrometer using electron spray ionization or Waters GCT Premier time-of-flight mass spectrometer with a field ionization (FI) ion source.

<sup>13</sup>C NMR spectra were recorded on a Bruker AV-500 spectrometer and a Bruker AV-500 spectrometer in chloroform-d<sub>3</sub>. Chemical shifts are reported in ppm with the internal chloroform signal at 7.26 and 77.0 ppm as a standard.

**Table 1 Screening conditions**

Reaction scheme: **1a**  $\xrightarrow[\text{N-Oxide, DCE, rt, 10h}]{[\text{Au}]/\text{additive}}$  **3a**

---

**2a**

**2b**

**2c**

**2d**

**2e**

| Entry | N-Oxide (equiv) | Catalyst (mol %)                            | Additive (mol%)          | Yield <sup>b</sup> |
|-------|-----------------|---------------------------------------------|--------------------------|--------------------|
| 1     | <b>2a</b> (2.5) | Me <sub>4</sub> <sup>t</sup> BuXPhosAuCl(5) | NaBARF <sub>4</sub> (10) | 82% <sup>c</sup>   |
| 2     | <b>2b</b> (2.5) | Me <sub>4</sub> <sup>t</sup> BuXPhosAuCl(5) | NaBARF <sub>4</sub> (10) | 58%                |
| 3     | <b>2c</b> (2.5) | Me <sub>4</sub> <sup>t</sup> BuXPhosAuCl(5) | NaBARF <sub>4</sub> (10) | 55%                |
| 4     | <b>2d</b> (2.5) | Me <sub>4</sub> <sup>t</sup> BuXPhosAuCl(5) | NaBARF <sub>4</sub> (10) | 57%                |
| 5     | <b>2e</b> (2.5) | Me <sub>4</sub> <sup>t</sup> BuXPhosAuCl(5) | NaBARF <sub>4</sub> (10) | 73%                |
| 6     | <b>2a</b> (1.5) | Me <sub>4</sub> <sup>t</sup> BuXPhosAuCl(5) | NaBARF <sub>4</sub> (10) | 60%                |
| 7     | <b>2a</b> (2.0) | Me <sub>4</sub> <sup>t</sup> BuXPhosAuCl(5) | NaBARF <sub>4</sub> (10) | 78%                |

|    |                 |                                                 |                               |                   |
|----|-----------------|-------------------------------------------------|-------------------------------|-------------------|
| 8  | <b>2a</b> (3.0) | Me <sub>4</sub> <sup>t</sup> BuXPhosAuCl(5)     | NaBARF <sub>4</sub> (10)      | 79%               |
| 9  | <b>2a</b> (2.5) | <b>Me<sub>4</sub><sup>t</sup>BuXPhosAuCl(2)</b> | <b>NaBARF<sub>4</sub> (4)</b> | <b>82%</b>        |
| 10 | <b>2a</b> (2.5) | Ph <sub>3</sub> PAuCl(2)                        | NaBARF <sub>4</sub> (4)       | < 3%              |
| 11 | <b>2a</b> (2.5) | IPrAuCl(2)                                      | NaBARF <sub>4</sub> (4)       | < 5%              |
| 12 | <b>2a</b> (2.5) | Mor-DalPhosAuNTf <sub>2</sub> (2)               | -                             | 72%               |
| 13 | <b>2a</b> (2.5) | Me <sub>4</sub> <sup>t</sup> BuXPhosAuCl(2)     | NaBARF <sub>4</sub> (4)       | < 3% <sup>d</sup> |
| 14 | <b>2a</b> (2.5) | Me <sub>4</sub> <sup>t</sup> BuXPhosAuCl(2)     | NaBARF <sub>4</sub> (4)       | 45% <sup>e</sup>  |
| 15 | <b>2a</b> (2.5) | Me <sub>4</sub> <sup>t</sup> BuXPhosAuCl(2)     | NaBARF <sub>4</sub> (4)       | < 3% <sup>f</sup> |

<sup>a</sup> The reaction was run with everything in a vial capped with a septum, Initially, [1a]=0.1M. <sup>b</sup> Isolated yield. <sup>c</sup> Reaction time 5h. <sup>d</sup> Acetonitrile as the solvent. <sup>e</sup> Toluene as the solvent. <sup>f</sup> Acetone as the solvent.

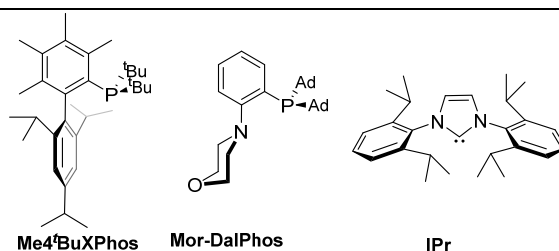

### General procedure A: Methods for the synthesis 4-Oxahepta-1,6-diyne derivatives

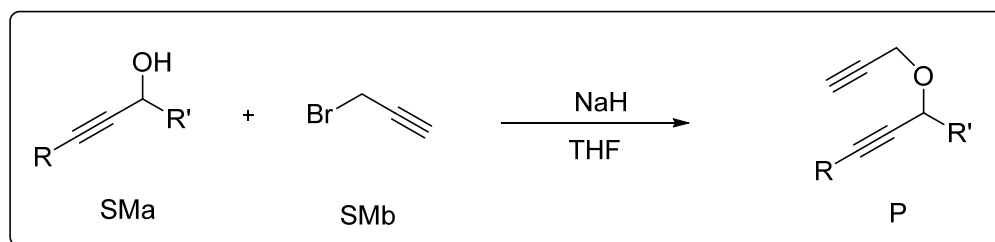

A solution of propargyl alcohol **SMa** (5 mmol) was added a solution of NaH (6 mmol) in THF (ca. 20 mL) at 0 °C, after stirring for 30 minutes at room temperature, cool to 0 °C, propargyl bromide **SMb** (80 % in toluene, 6 mmol) was added dropwise and the resulting slurry was efficiently stirred at room temperature for 6 h. NH<sub>4</sub>Cl (10.0 mL), which was extracted with Et<sub>2</sub>O. The combined organic phase was washed with water, brine, dried (Na<sub>2</sub>SO<sub>4</sub>) and concentrated. The mixture was purified by flash chromatography on silica gel (petroleum ether/EtOAc = 10:1) to give pure product 4-oxahepta-1,6-diynes as a colorless oil (70% yield).

### SM NMR data

The known compound 4-oxahepta-1,6-diynes **1a**,<sup>1</sup> was prepared according to the general procedure **A** and its spectroscopic data were in accordance with the literature data.

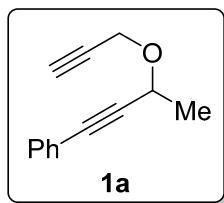

(3-(prop-2-yn-1-yloxy)but-1-yn-1-yl)benzene **1a**<sup>1</sup> is known compound. <sup>1</sup>H NMR (500 MHz, CDCl<sub>3</sub>) δ 7.48 – 7.41 (m, 2H), 7.35 – 7.29 (m, 3H), 4.64 (q, *J* = 6.6 Hz, 1H), 4.43 – 4.29 (m, 2H), 2.51 – 2.41 (m, 1H), 1.56 (d, *J* = 6.6 Hz, 3H). <sup>13</sup>C NMR (126 MHz, CDCl<sub>3</sub>) δ 131.71, 128.41, 128.23, 122.44, 87.89, 85.61, 79.55, 74.40, 64.59, 55.72, 21.98.

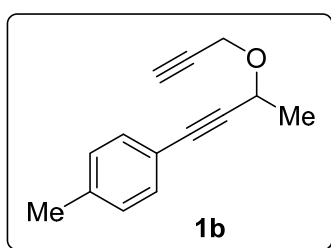

**1-methyl-4-(3-(prop-2-yn-1-yloxy)but-1-yn-1-yl)benzene 1b:** The compound **1b** was prepared in 78% yield through the General Procedure A. <sup>1</sup>H NMR (500 MHz, CDCl<sub>3</sub>) δ 7.33 (d, *J* = 8.1 Hz, 2H), 7.11 (d, *J* = 7.9 Hz, 2H), 4.68 – 4.56 (m, 1H), 4.49 – 4.25 (m, 2H), 2.51 – 2.40 (m, 1H), 2.34 (s, 3H), 1.54 (t, *J* = 7.1 Hz, 3H). <sup>13</sup>C NMR (126 MHz, CDCl<sub>3</sub>) δ 138.55, 131.65, 131.62, 129.00, 119.38, 87.17, 85.76, 79.64, 74.34, 64.67, 55.69, 22.04, 21.42. IR (neat, cm<sup>-1</sup>): 3295, 2987, 2928, 1615, 1509, 1369, 1095, 756. GCMS (*m/z*): 198.10

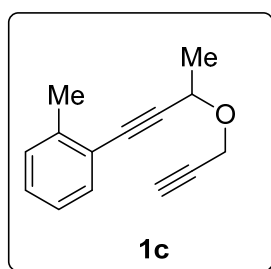

**1-methyl-2-(3-(prop-2-yn-1-yloxy)but-1-yn-1-yl)benzene 1c :** The compound **1c** was prepared in 75% yield through the General Procedure A. <sup>1</sup>H NMR (500 MHz, CDCl<sub>3</sub>) δ 7.41 (d, *J* = 7.5 Hz, 1H), 7.26 – 7.18 (m, 2H), 7.17 – 7.11 (m, 1H), 4.75 – 4.64 (m, 1H), 4.44 – 4.31 (m, 2H), 2.45 (q, *J* = 2.7 Hz, 1H), 2.43 (s, 3H), 1.58 (d, *J* = 6.6 Hz, 3H). <sup>13</sup>C NMR (126 MHz, CDCl<sub>3</sub>) δ 140.23, 132.03, 129.41, 128.46, 125.51, 122.24, 91.84, 84.54, 74.41, 64.71,



55.72, 22.18, 20.68. IR (neat,  $\text{cm}^{-1}$ ): 3295, 2988, 2927, 1617, 1509, 1368, 1224, 1095, 756.

GCMS ( $m/z$ ): 198.10

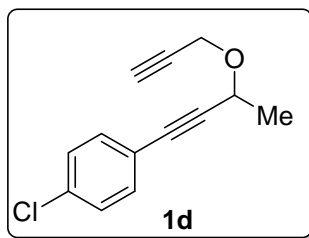

1-chloro-4-(3-(prop-2-yn-1-yloxy)but-1-yn-1-yl)benzene **1d**: The compound **1d** was prepared in 70% yield through the General Procedure A.  $^1\text{H}$  NMR (500 MHz,  $\text{CDCl}_3$ )  $\delta$  7.35 (t,  $J = 9.2$  Hz, 2H), 7.28 (dd,  $J = 8.4, 1.8$  Hz, 2H), 4.74 – 4.54 (m, 1H), 4.44 – 4.26 (m, 2H), 2.46 (t,  $J = 2.4$  Hz, 1H), 1.54 (t,  $J = 7.1$  Hz, 3H).  $^{13}\text{C}$  NMR (126 MHz,  $\text{CDCl}_3$ )  $\delta$  134.50, 132.98, 132.95, 128.60, 128.58, 120.94, 88.94, 84.49, 79.45, 74.52, 64.54, 55.80. IR (neat,  $\text{cm}^{-1}$ ): 3298, 2930, 2224, 1620, 1519, 1368, 1224, 1095, 760. GCMS ( $m/z$ ): 218.05

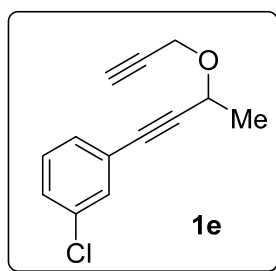

1-chloro-3-(3-(prop-2-yn-1-yloxy)but-1-yn-1-yl)benzene **1e**: The compound **1e** was prepared in 70% yield through the General Procedure A.  $^1\text{H}$  NMR (500 MHz,  $\text{CDCl}_3$ )  $\delta$  7.44 (t,  $J = 1.6$  Hz, 1H), 7.34 – 7.28 (m, 2H), 7.25 (dd,  $J = 14.0, 6.2$  Hz, 1H), 4.63 (q,  $J = 6.6$  Hz, 1H), 4.35 (ddd,  $J = 36.8, 15.7, 2.4$  Hz, 2H), 2.47 (t,  $J = 2.4$  Hz, 1H), 1.55 (d,  $J = 6.6$  Hz, 3H).  $^{13}\text{C}$  NMR (126 MHz,  $\text{CDCl}_3$ )  $\delta$  134.10, 131.61, 129.83, 129.49, 128.73, 124.16, 89.21, 84.20, 79.40, 74.56, 64.47, 55.83, 21.87. IR (neat,  $\text{cm}^{-1}$ ): 3297, 2928, 2224, 1620, 1519, 1368, 1224, 1093, 758. GCMS ( $m/z$ ): 218.05

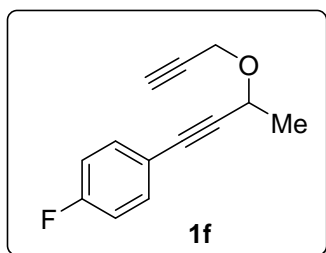

1-fluoro-4-(3-(prop-2-yn-1-yloxy)but-1-yn-1-yl)benzene **1f**: The compound **1f** was prepared in 68 % yield through the General Procedure A.  $^1\text{H}$  NMR (500 MHz,  $\text{CDCl}_3$ )  $\delta$  7.46 – 7.36 (m, 2H), 7.00 (t,  $J = 8.7$  Hz, 2H), 4.62 (q,  $J = 6.6$  Hz, 1H), 4.35 (ddd,  $J = 36.0, 15.7, 2.4$  Hz, 2H), 2.45 (t,  $J = 2.3$  Hz, 1H), 1.58 – 1.49 (m, 3H).  $^{13}\text{C}$  NMR (126 MHz,  $\text{CDCl}_3$ )  $\delta$  162.58 (d,  $J_{\text{C-F}} = 249.7$  Hz), 133.66 (d,  $J_{\text{C-F}} = 8.4$  Hz), 118.55 (d,  $J_{\text{C-F}} = 3.6$  Hz), 115.55 (d,  $J_{\text{C-F}} = 22.1$  Hz), 87.64, 84.56, 79.51, 74.46, 64.57, 55.78, 21.97. IR (neat,  $\text{cm}^{-1}$ ): 3436, 3290, 2222, 1616, 1518, 1368, 1224, 758. GCMS ( $m/z$ ): 202.08

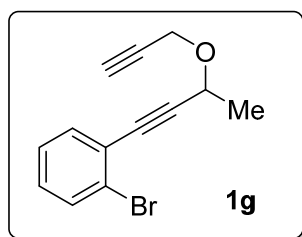

**1-bromo-2-(3-(prop-2-yn-1-yloxy)but-1-yn-1-yl)benzene 1g**: The compound **1g** was prepared in 50 % yield through the General Procedure A.  $^1\text{H}$  NMR (500 MHz,  $\text{CDCl}_3$ )  $\delta$  7.59 (dd,  $J = 8.0, 0.9$  Hz, 1H), 7.46 (dt,  $J = 10.2, 5.1$  Hz, 1H), 7.32 – 7.23 (m, 1H), 7.18 (td,  $J = 7.8, 1.7$  Hz, 1H), 4.80 – 4.64 (m, 1H), 4.49 – 4.35 (m, 2H), 2.47 (t,  $J = 2.4$  Hz, 1H), 1.58 (t,  $J = 7.1$  Hz, 3H).  $^{13}\text{C}$  NMR (126 MHz,  $\text{CDCl}_3$ )  $\delta$  133.38, 132.36, 129.60, 126.95, 125.59, 124.60, 92.64, 84.16, 79.50, 74.51, 64.56, 55.88, 21.81. IR (neat,  $\text{cm}^{-1}$ ): 3299, 2932, 2228, 1627, 1524, 1368, 1224, 1095, 763. GCMS ( $m/z$ ): 262.00

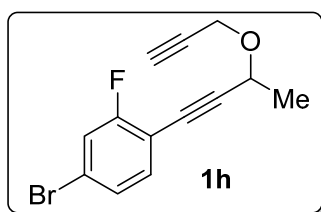

4-bromo-2-fluoro-1-(3-(prop-2-yn-1-yloxy)but-1-yn-1-yl)benzene **1h**: The compound **1h** was prepared in 53 % yield through the General Procedure A.  $^1\text{H}$  NMR (500 MHz,  $\text{CDCl}_3$ )  $\delta$  7.33 – 7.20 (m, 3H), 4.65 (q,  $J = 6.6$  Hz, 1H), 4.35 (ddd,  $J = 36.4, 15.7, 2.4$  Hz, 2H), 2.46 (t,  $J = 2.4$  Hz, 1H), 1.56 (d,  $J = 6.6$  Hz, 3H).  $^{13}\text{C}$  NMR (126 MHz,  $\text{CDCl}_3$ )  $\delta$  162.48 (d,  $J_{\text{C-F}} = 256.4$  Hz), 134.23 (d,  $J_{\text{C-F}} = 1.7$  Hz), 127.38 (d,  $J_{\text{C-F}} = 3.8$  Hz), 122.82 (d,  $J_{\text{C-F}} = 9.0$  Hz), 119.29 (d,  $J_{\text{C-F}} = 24.1$  Hz), 110.30 (d,  $J_{\text{C-F}} = 15.9$  Hz), 94.43 (d,  $J_{\text{C-F}} = 3.4$  Hz), 79.36, 78.09, 74.59,

64.56, 55.86, 21.75. IR (neat,  $\text{cm}^{-1}$ ): 3230, 2933, 2226, 1627, 1527, 1365, 1224, 1095, 760.

GCMS ( $m/z$ ): 280.00

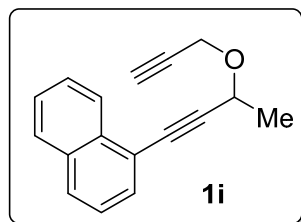

1-(3-(prop-2-yn-1-yloxy)but-1-yn-1-yl)naphthalene **1i**: The compound **1i** was prepared in 68 % yield through the General Procedure A.  $^1\text{H}$  NMR (500 MHz,  $\text{CDCl}_3$ )  $\delta$  8.31 (d,  $J = 8.3$  Hz, 1H), 7.85 (t,  $J = 8.1$  Hz, 2H), 7.69 (d,  $J = 7.1$  Hz, 1H), 7.58 (t,  $J = 7.5$  Hz, 1H), 7.55 – 7.50 (m, 1H), 7.43 (dd,  $J = 8.1, 7.3$  Hz, 1H), 4.81 (q,  $J = 6.6$  Hz, 1H), 4.55 – 4.40 (m, 2H), 2.49 (t,  $J = 1.9$  Hz, 1H), 1.67 (d,  $J = 6.6$  Hz, 3H).  $^{13}\text{C}$  NMR (126 MHz,  $\text{CDCl}_3$ )  $\delta$  133.29, 133.13, 130.69, 128.96, 128.29, 126.84, 126.41, 125.99, 125.13, 120.11, 92.90, 83.75, 79.61, 74.53, 64.87, 55.91, 22.23. IR (neat,  $\text{cm}^{-1}$ ): 3292, 3056, 2855, 1714, 1585, 1500, 1076, 801, 745. GCMS ( $m/z$ ): 234.10.

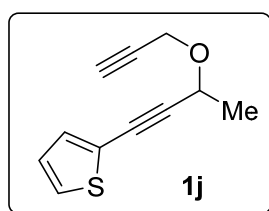

2-(3-(prop-2-yn-1-yloxy)but-1-yn-1-yl)thiophene **1j**: The compound **1j** was prepared in 80 % yield through the General Procedure A.  $^1\text{H}$  NMR (500 MHz,  $\text{CDCl}_3$ )  $\delta$  7.28 – 7.22 (m, 1H), 6.97 (dd,  $J = 5.1, 3.7$  Hz, 1H), 4.64 (q,  $J = 6.6$  Hz, 1H), 4.33 (ddd,  $J = 38.2, 15.7, 2.4$  Hz, 2H), 2.45 (t,  $J = 2.4$  Hz, 1H), 1.55 (t,  $J = 7.3$  Hz, 3H).  $^{13}\text{C}$  NMR (126 MHz,  $\text{CDCl}_3$ )  $\delta$  132.36, 127.30, 126.91, 122.36, 91.82, 79.48, 78.89, 74.51, 64.72, 55.84, 21.85. IR (neat,  $\text{cm}^{-1}$ ): 3290, 3045, 2856, 1718, 1585, 1512, 1096, 745. HRMS (ESI  $\text{M}+\text{Na}^+$ ) calcd for  $\text{C}_{11}\text{H}_{11}\text{NaOS}^+$ : 213.0345, found: 213.0349.

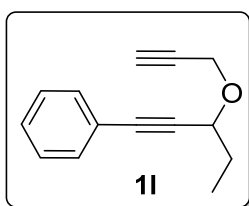

(3-(prop-2-yn-1-yloxy)pent-1-yn-1-yl)benzene **1l**: The compound **1l** was prepared in 70 % yield through the General Procedure A.  $^1\text{H}$  NMR (500 MHz,  $\text{CDCl}_3$ )  $\delta$  7.40 – 7.30 (m, 2H), 7.28 – 7.18 (m, 3H), 4.36 (dd,  $J = 16.2, 9.8$  Hz, 1H), 4.27 (qd,  $J = 15.7, 2.3$  Hz, 2H), 2.35 (t,  $J = 2.3$  Hz, 1H), 1.83 – 1.68 (m, 2H), 0.99 (t,  $J = 7.4$  Hz, 3H).  $^{13}\text{C}$  NMR (126 MHz,  $\text{CDCl}_3$ )  $\delta$  131.77, 128.40, 128.26, 122.59, 87.06, 86.37, 79.69, 74.33, 70.14, 55.83, 28.80, 9.67. IR (neat,  $\text{cm}^{-1}$ ): 3294, 2989, 2929, 1613, 1500, 1367, 1095, 755. GCMS ( $m/z$ ): 198.10.

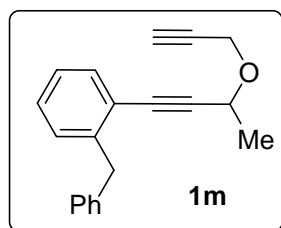

**1-benzyl-2-(3-(prop-2-yn-1-yloxy)but-1-yn-1-yl)benzene 1m**: The compound **1m** was prepared in 70 % yield through the General Procedure A.  $^1\text{H}$  NMR (500 MHz,  $\text{CDCl}_3$ )  $\delta$  7.45 (d,  $J = 7.6$  Hz, 1H), 7.25 (q,  $J = 7.4$  Hz, 3H), 7.22 – 7.12 (m, 5H), 4.63 (q,  $J = 6.6$  Hz, 1H), 4.23 (ddt,  $J = 18.7, 13.1, 6.6$  Hz, 2H), 4.15 (s, 2H), 2.42 (t,  $J = 2.4$  Hz, 1H), 1.52 (d,  $J = 6.6$  Hz, 3H).  $^{13}\text{C}$  NMR (126 MHz,  $\text{CDCl}_3$ )  $\delta$  143.01, 140.37, 132.57, 129.49, 128.85, 128.73, 128.38, 126.13, 126.06, 122.23, 91.99, 84.52, 79.58, 74.41, 64.66, 55.71, 40.23, 22.04. IR (neat,  $\text{cm}^{-1}$ ): 3293, 3060, 1492, 1446, 1076, 818, 693. GCMS ( $m/z$ ): 274.14.

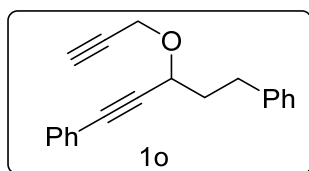

**(3-(prop-2-yn-1-yloxy)pent-1-yne-1,5-diyl)dibenzene 1o**: The compound **1o** was prepared in 78 % yield through the General Procedure A.  $^1\text{H}$  NMR (500 MHz,  $\text{CDCl}_3$ )  $\delta$  7.51 – 7.40 (m, 2H), 7.37 – 7.14 (m, 8H), 4.52 (t,  $J = 6.4$  Hz, 1H), 4.39 (ddd,  $J = 45.3, 15.7, 2.1$  Hz, 2H), 3.02 – 2.80 (m, 2H), 2.45 (d,  $J = 2.2$  Hz, 1H), 2.27 – 2.08 (m, 2H).  $^{13}\text{C}$  NMR (126 MHz,  $\text{CDCl}_3$ )  $\delta$  141.33, 131.78, 128.57, 128.49, 128.38, 128.29, 125.94, 122.47, 86.93, 86.68, 79.60, 74.49, 68.11, 55.89, 37.21, 31.43. IR (neat,  $\text{cm}^{-1}$ ): 3292, 3061, 1493, 1448, 1077, 817, 693. GCMS ( $m/z$ ): 274.14.

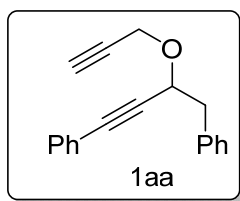

**(3-(prop-2-yn-1-yloxy)but-1-yne-1,4-diyl)dibenzene 1aa:** The compound **1aa** was prepared in 72 % yield through the General Procedure **A**.  $^1\text{H}$  NMR (500 MHz,  $\text{CDCl}_3$ )  $\delta$  7.40 – 7.21 (m, 10H), 4.72 (t,  $J = 6.7$  Hz, 1H), 4.36 (tt,  $J = 15.8, 7.8$  Hz, 2H), 3.22 – 3.07 (m, 2H), 2.42 (t,  $J = 2.3$  Hz, 1H).  $^{13}\text{C}$  NMR (126 MHz,  $\text{CDCl}_3$ )  $\delta$  136.86, 131.68, 129.74, 128.46, 128.24, 128.15, 126.66, 122.43, 87.33, 86.64, 79.42, 74.57, 69.75, 55.92, 42.02. IR (neat,  $\text{cm}^{-1}$ ): 3293, 3060, 1492, 1446, 1077, 816, 693. GCMS ( $m/z$ ): 260.11.

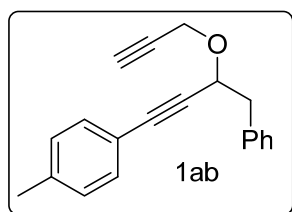

1-methyl-4-(4-phenyl-3-(prop-2-yn-1-yloxy)but-1-yn-1-yl)benzene **1ab**: The compound **1ab** was prepared in 72 % yield through the General Procedure **A**.  $^1\text{H}$  NMR (500 MHz,  $\text{CDCl}_3$ )  $\delta$  7.48 – 7.31 (m, 8H), 7.19 (d,  $J = 7.9$  Hz, 2H), 4.83 (t,  $J = 6.7$  Hz, 1H), 4.46 (qd,  $J = 15.8, 2.4$  Hz, 2H), 3.32 – 3.18 (m, 2H), 2.50 (dt,  $J = 8.1, 2.4$  Hz, 1H), 2.42 (s, 3H).  $^{13}\text{C}$  NMR (126 MHz,  $\text{CDCl}_3$ )  $\delta$  138.45, 136.81, 131.47, 129.65, 128.90, 128.02, 126.52, 119.24, 87.37, 85.87, 79.38, 74.53, 69.64, 55.73, 41.94, 21.32. IR (neat,  $\text{cm}^{-1}$ ): 3448, 32943, 3060, 2927, 1492, 1446, 1337, 1077, 917, 816. GCMS ( $m/z$ ): 274.13.

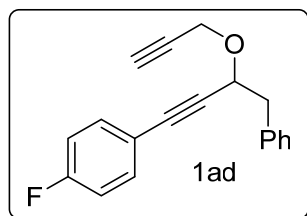

1-fluoro-4-(4-phenyl-3-(prop-2-yn-1-yloxy)but-1-yn-1-yl)benzene **1ad**: The compound **1ad** was prepared in 72 % yield through the General Procedure **A**.  $^1\text{H}$  NMR (500 MHz,  $\text{CDCl}_3$ )  $\delta$  7.41 – 7.26 (m, 7H), 7.02 (t,  $J = 8.7$  Hz, 2H), 4.76 (t,  $J = 6.6$  Hz, 1H), 4.40 (qd,  $J = 15.7, 1.1$  Hz, 2H), 3.26 – 3.09 (m, 2H), 2.51 – 2.39 (m, 1H).  $^{13}\text{C}$  NMR (126 MHz,  $\text{CDCl}_3$ )  $\delta$  163.52,

161.54, 136.76, 133.60, 133.53, 129.70, 128.13, 126.66, 118.45, 118.42, 115.60, 115.42. IR (neat,  $\text{cm}^{-1}$ ): 3290, 3056, 1490, 1446, 1338, 1076, 816, 693, 637. GCMS ( $m/z$ ): 278.10.

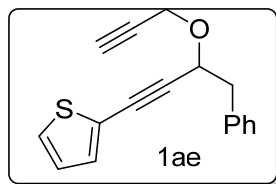

2-(4-phenyl-3-(prop-2-yn-1-yloxy)but-1-yn-1-yl)thiophene **1ae**: The compound **1ae** was prepared in 70 % yield through the General Procedure A.  $^1\text{H}$  NMR (500 MHz,  $\text{CDCl}_3$ )  $\delta$  7.35 – 7.28 (m, 4H), 7.26 – 7.22 (m, 2H), 7.17 (dd,  $J = 3.6, 1.0$  Hz, 1H), 6.95 (dd,  $J = 5.1, 3.7$  Hz, 1H), 4.72 (t,  $J = 6.6$  Hz, 1H), 4.47 – 4.21 (m, 2H), 3.13 (qd,  $J = 13.6, 6.7$  Hz, 2H), 2.42 (t,  $J = 2.4$  Hz, 1H).  $^{13}\text{C}$  NMR (126 MHz,  $\text{CDCl}_3$ )  $\delta$  136.68, 132.34, 129.72, 128.19, 127.36, 126.90, 126.69, 122.27, 90.60, 80.59, 79.30, 74.69, 69.81, 56.01, 41.86. IR (neat,  $\text{cm}^{-1}$ ): 3448, 3063, 1492, 1446, 1075, 816, 712. HRMS (ESI  $\text{M}+\text{Na}^+$ ) calcd for  $\text{C}_{17}\text{H}_{14}\text{NaOS}^+$ : 289.0658, found: 289.0662.

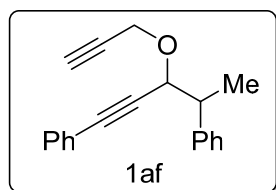

(3-(prop-2-yn-1-yloxy)pent-1-yn-1,4-diyl)dibenzene **1af**: The compound **1af** was prepared in 76 % yield through the General Procedure A.  $^1\text{H}$  NMR (500 MHz,  $\text{CDCl}_3$ )  $\delta$  7.43 – 7.24 (m, 10H), 4.66 (ddd,  $J = 6.2, 5.5, 3.3$  Hz, 1H), 4.43 – 4.31 (m, 2H), 3.30 – 3.12 (m, 1H), 2.50 – 2.39 (m, 1H), 1.50 (dt,  $J = 7.1, 3.7$  Hz, 3H).  $^{13}\text{C}$  NMR (126 MHz,  $\text{CDCl}_3$ )  $\delta$  142.64, 131.71, 131.64, 128.38, 128.34, 128.26, 128.19, 128.15, 128.11, 128.00, 126.70, 122.53, 87.50, 86.25, 79.57, 74.47, 73.60, 56.05, 44.74, 17.22. IR (neat,  $\text{cm}^{-1}$ ): 3448, 3292, 3060, 1492, 1446, 1076, 816, 695. GCMS ( $m/z$ ): 274.13.

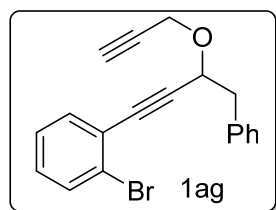

(3-(prop-2-yn-1-yloxy)pent-1-yne-1,4-diyl)dibenzene **1ag**: The compound **1ag** was prepared in 66% yield through the General Procedure A.  $^1\text{H}$  NMR (500 MHz,  $\text{CDCl}_3$ )  $\delta$  7.59 (dd,  $J = 8.0, 1.0$  Hz, 1H), 7.44 – 7.38 (m, 3H), 7.35 (dd,  $J = 10.2, 4.7$  Hz, 2H), 7.30 – 7.24 (m, 2H), 7.18 (td,  $J = 7.8, 1.7$  Hz, 1H), 4.85 (dt,  $J = 13.5, 6.8$  Hz, 1H), 4.55 – 4.40 (m, 2H), 3.21 (ddd,  $J = 20.8, 13.6, 6.8$  Hz, 2H), 2.47 (t,  $J = 2.4$  Hz, 1H).  $^{13}\text{C}$  NMR (126 MHz,  $\text{CDCl}_3$ )  $\delta$  136.63, 133.41, 132.30, 129.74, 129.60, 128.16, 126.89, 126.66, 125.42, 124.54, 91.29, 85.76, 79.32, 74.69, 69.63, 55.96, 41.73. IR (neat,  $\text{cm}^{-1}$ ): 3295, 3060, 1492, 1446, 1075, 817, 700. HRMS (ESI  $\text{M}+\text{Na}^+$ ) calcd for  $\text{C}_{19}\text{H}_{15}\text{BrNaO}^+$ : 361.0198, found: 361.0199.

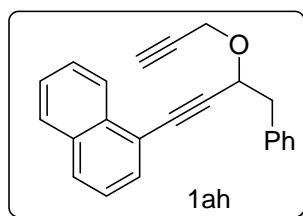

(3-(prop-2-yn-1-yloxy)pent-1-yne-1,4-diyl)dibenzene **1ah**: The compound **1ah** was prepared in 66% yield through the General Procedure A.  $^1\text{H}$  NMR (500 MHz,  $\text{CDCl}_3$ )  $\delta$  8.16 – 8.05 (m, 1H), 7.89 – 7.81 (m, 2H), 7.67 (dd,  $J = 7.1, 0.9$  Hz, 1H), 7.57 – 7.51 (m, 2H), 7.48 – 7.31 (m, 6H), 5.03 – 4.92 (m, 1H), 4.58 – 4.47 (m, 2H), 3.30 (ddd,  $J = 20.9, 13.6, 6.7$  Hz, 2H), 2.52 (t,  $J = 2.4$  Hz, 1H).  $^{13}\text{C}$  NMR (126 MHz,  $\text{CDCl}_3$ )  $\delta$  136.85, 133.18, 133.01, 130.57, 129.82, 128.91, 128.26, 128.16, 126.73, 126.70, 126.35, 126.08, 125.06, 120.01, 91.41, 85.52, 79.41, 74.74, 69.98, 56.02, 42.05. IR (neat,  $\text{cm}^{-1}$ ): 3292, 3057, 1715, 1077, 801, 699. HRMS (ESI  $\text{M}+\text{Na}^+$ ) calcd for  $\text{C}_{23}\text{H}_{18}\text{NaO}^+$ : 333.1250, found: 333.1258.

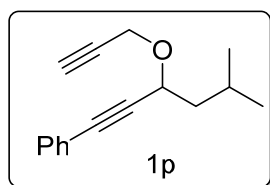

(5-methyl-3-(prop-2-yn-1-yloxy)hex-1-yn-1-yl)benzene **1p**: The compound **1p** was prepared in 77 % yield through the General Procedure A.  $^1\text{H}$  NMR (500 MHz,  $\text{CDCl}_3$ )  $\delta$  7.44 (dd,  $J = 6.6, 3.1$  Hz, 2H), 7.39 – 7.29 (m, 3H), 4.57 (t,  $J = 7.1$  Hz, 1H), 4.37 (qd,  $J = 15.7, 2.3$  Hz, 2H), 2.45 (t,  $J = 2.3$  Hz, 1H), 1.94 (tt,  $J = 13.4, 6.8$  Hz, 1H), 1.80 (dt,  $J = 14.2, 7.2$  Hz, 1H), 1.67

(dt,  $J = 13.7, 6.9$  Hz, 1H), 0.98 (t,  $J = 6.3$  Hz, 6H).  $^{13}\text{C}$  NMR (126 MHz,  $\text{CDCl}_3$ )  $\delta$  131.74, 128.38, 128.26, 122.61, 87.51, 86.13, 79.70, 74.32, 67.36, 55.72, 44.55, 24.70, 22.69, 22.33. IR (neat,  $\text{cm}^{-1}$ ): 3060, 2970, 1732, 1358, 808, 725. GCMS ( $m/z$ ): 226.12.

**General procedure B: gold catalyzed selective oxidation of 4-Oxahepta-1,6-diyne derivatives to 2H-pyran-3(6H)-ones 3**

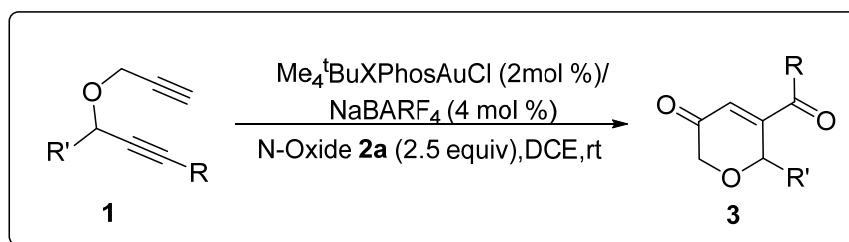

To a 3 dram vial containing 2 mL of DCE were added sequentially the 4-Oxahepta-1,6-diyne 1 (0.2 mmol), 2,6-dichloropyridine *N*-oxide 2a (82 mg, 0.5 mmol),  $\text{Me}_4\text{tBuXphosAuCl}$  (4.0 mg, 0.004 mmol) and  $\text{NaBARF}_4$  (7.0 mg, 0.008 mmol). The resulting mixture was stirred at 25 °C or the indicated temperature, and the progress of the reaction was monitored by TLC. Upon completion, the reaction mixture was concentrated under vacuum. The residue was purified by chromatography on silica gel (eluent: hexanes/ethyl acetate) to afford the desired 2H-pyran-3(6H)-ones 3.

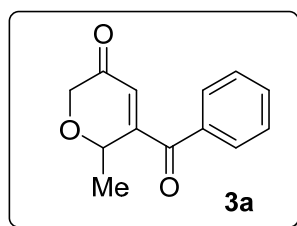

**5-benzoyl-6-methyl-2H-pyran-3(6H)-one 3a** was prepared in 82% yield according to the general procedure B.  $^1\text{H}$  NMR (500 MHz,  $\text{CDCl}_3$ )  $\delta$  7.87 (dd,  $J = 8.3, 1.1$  Hz, 2H), 7.70 – 7.61 (m, 1H), 7.52 (t,  $J = 7.8$  Hz, 2H), 6.23 (d,  $J = 1.9$  Hz, 1H), 4.95 (dtd,  $J = 6.8, 5.2, 1.6$  Hz, 1H), 4.37 (d,  $J = 16.6$  Hz, 1H), 4.18 (dd,  $J = 16.6, 1.4$  Hz, 1H), 1.45 (d,  $J = 6.8$  Hz, 3H).  $^{13}\text{C}$  NMR (126 MHz,  $\text{CDCl}_3$ )  $\delta$  194.96, 194.77, 158.85, 135.16, 134.25, 129.71, 128.92, 127.40, 70.65, 70.17, 18.14. IR (neat,  $\text{cm}^{-1}$ ): 3061, 1698, 1659, 1249, 1134, 722. HRMS ( $\text{M}+\text{H}^+$ ) calcd for  $\text{C}_{14}\text{H}_{15}\text{O}_3^+$ : 217.0859, found: 217.0862.



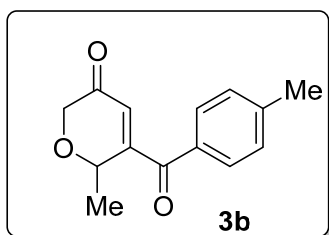

6-methyl-5-(4-methylbenzoyl)-2H-pyran-3(6H)-one **3b** was prepared in 72% yield according to the general procedure B.  $^1\text{H}$  NMR (500 MHz,  $\text{CDCl}_3$ )  $\delta$  7.83 (d,  $J = 7.3$  Hz, 2H), 7.36 (d,  $J = 7.8$  Hz, 2H), 6.26 (s, 1H), 4.99 (dd,  $J = 12.9, 6.1$  Hz, 1H), 4.41 (d,  $J = 16.6$  Hz, 1H), 4.22 (d,  $J = 16.6$  Hz, 1H), 2.49 (s, 3H), 1.50 – 1.45 (m, 3H).  $^{13}\text{C}$  NMR (126 MHz,  $\text{CDCl}_3$ )  $\delta$  194.87, 194.54, 159.28, 145.64, 132.58, 129.95, 129.68, 126.90, 70.79, 70.34, 21.85, 18.19. IR (neat,  $\text{cm}^{-1}$ ): 3035, 1698, 1656, 1254, 1133, 752. HRMS ( $\text{M}+\text{H}^+$ ) calcd for  $\text{C}_{14}\text{H}_{15}\text{O}_3^+$ : 231.1016, found: 231.1018.

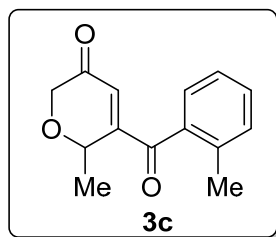

6-methyl-5-(2-methylbenzoyl)-2H-pyran-3(6H)-one **3c** was prepared in 70% yield according to the general procedure B.  $^1\text{H}$  NMR (500 MHz,  $\text{CDCl}_3$ )  $\delta$  7.47 (dd,  $J = 19.9, 7.3$  Hz, 2H), 7.39 – 7.27 (m, 2H), 6.20 (s, 1H), 5.02 (d,  $J = 6.2$  Hz, 1H), 4.40 (d,  $J = 16.9$  Hz, 1H), 4.20 (d,  $J = 16.8$  Hz, 1H), 2.48 (s, 3H), 1.58 (d,  $J = 6.2$  Hz, 3H).  $^{13}\text{C}$  NMR (126 MHz,  $\text{CDCl}_3$ )  $\delta$  197.91, 195.71, 158.93, 138.39, 135.58, 132.00, 131.79, 129.71, 129.35, 125.58, 69.85, 69.21, 20.41, 17.95. IR (neat,  $\text{cm}^{-1}$ ): 3035, 1698, 1657, 1254, 1133, 745. HRMS ( $\text{M}+\text{H}^+$ ) calcd for  $\text{C}_{14}\text{H}_{15}\text{O}_3^+$ : 231.1016, found: 231.1018.

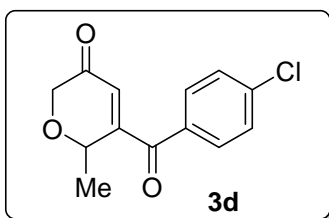

5-(4-chlorobenzoyl)-6-methyl-2H-pyran-3(6H)-one **3d** was prepared in 65% yield according to the general procedure B.  $^1\text{H}$  NMR (500 MHz,  $\text{CDCl}_3$ )  $\delta$  7.92 – 7.82 (m, 2H), 7.62 – 7.51 (m, 2H), 6.26 (d,  $J = 1.9$  Hz, 1H), 5.06 – 4.93 (m, 1H), 5.05 – 4.92 (m, 1H), 4.42 (d,  $J = 16.7$  Hz, 1H), 4.22 (dd,  $J = 16.7, 1.3$  Hz, 1H), 1.48 (d,  $J = 6.8$  Hz, 3H).  $^{13}\text{C}$  NMR (126 MHz,  $\text{CDCl}_3$ )  $\delta$

194.58, 193.70, 158.36, 141.03, 133.37, 131.03, 129.33, 127.43, 70.58, 70.17, 18.13. IR (neat,  $\text{cm}^{-1}$ ): 3060, 1705, 1671, 1370, 1230, 751. HRMS ( $\text{M}+\text{H}^+$ ) calcd for  $\text{C}_{13}\text{H}_{12}\text{ClO}_3^+$ : 251.0469, found: 251.0472.

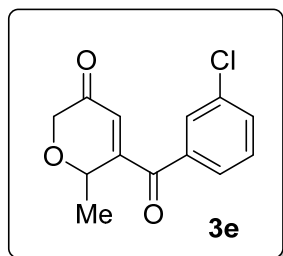

5-(3-chlorobenzoyl)-6-methyl-2H-pyran-3(6H)-one **3e** was prepared in 62% yield according to the general procedure B.  $^1\text{H}$  NMR (500 MHz,  $\text{CDCl}_3$ )  $\delta$  7.83 (t,  $J = 1.7$  Hz, 1H), 7.74 – 7.69 (m, 1H), 7.62 (ddd,  $J = 8.0, 2.0, 0.9$  Hz, 1H), 7.47 (t,  $J = 7.9$  Hz, 1H), 6.24 (d,  $J = 1.8$  Hz, 1H), 4.98 – 4.88 (m, 1H), 4.36 (t,  $J = 16.1$  Hz, 1H), 4.18 (dt,  $J = 16.7, 3.8$  Hz, 1H), 1.45 (d,  $J = 6.8$  Hz, 3H).  $^{13}\text{C}$  NMR (126 MHz,  $\text{CDCl}_3$ )  $\delta$  194.62, 193.69, 158.01, 136.66, 135.36, 134.16, 130.22, 129.43, 127.86, 127.80, 70.49, 70.09, 18.12. IR (neat,  $\text{cm}^{-1}$ ): 2978, 1703, 1671, 1370, 1229, 751. HRMS ( $\text{M}+\text{H}^+$ ) calcd for  $\text{C}_{13}\text{H}_{12}\text{ClO}_3^+$ : 251.0469, found: 251.0471.

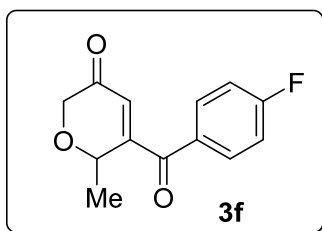

5-(4-fluorobenzoyl)-6-methyl-2H-pyran-3(6H)-one **3f** was prepared in 77% yield according to the general procedure B.  $^1\text{H}$  NMR (500 MHz,  $\text{CDCl}_3$ )  $\delta$  7.91 (ddd,  $J = 8.0, 5.0, 2.3$  Hz, 2H), 7.19 (dd,  $J = 14.1, 5.6$  Hz, 2H), 6.21 (d,  $J = 1.8$  Hz, 1H), 4.93 (q,  $J = 6.8$  Hz, 1H), 4.37 (d,  $J = 16.6$  Hz, 1H), 4.27 – 4.11 (m, 1H), 1.41 (dd,  $J = 16.4, 4.5$  Hz, 3H).  $^{13}\text{C}$  NMR (126 MHz,  $\text{CDCl}_3$ )  $\delta$  193.94 (d,  $J = 162.5$  Hz), 166.43 (d,  $J = 257.6$  Hz), 158.62, 132.46 (d,  $J = 9.6$  Hz), 131.45 (d,  $J = 2.9$  Hz), 127.19 (s), 116.25 (d,  $J = 22.1$  Hz), 70.63, 70.22, 18.12. IR (neat,  $\text{cm}^{-1}$ ): 3060, 1708, 1672, 1368, 1230, 751. HRMS ( $\text{M}+\text{H}^+$ ) calcd for  $\text{C}_{13}\text{H}_{12}\text{FO}_3^+$ : 236.0765, found: 236.0768.

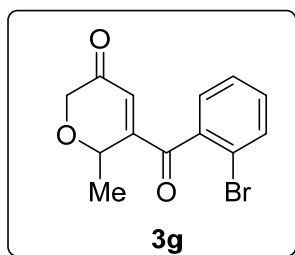

5-(2-bromobenzoyl)-6-methyl-2H-pyran-3(6H)-one **3g** was prepared in 50% yield according to the general procedure B.  $^1\text{H}$  NMR (500 MHz,  $\text{CDCl}_3$ )  $\delta$  7.62 (dt,  $J = 15.1, 7.4$  Hz, 1H), 7.47 – 7.36 (m, 2H), 7.33 (dd,  $J = 7.4, 1.8$  Hz, 1H), 6.15 (d,  $J = 1.5$  Hz, 1H), 5.07 – 4.96 (m, 1H), 4.37 (d,  $J = 17.0$  Hz, 1H), 4.15 (d,  $J = 16.8$  Hz, 1H), 1.62 (d,  $J = 6.8$  Hz, 3H).  $^{13}\text{C}$  NMR (126 MHz,  $\text{CDCl}_3$ )  $\delta$  196.36, 196.06, 156.49, 138.35, 133.51, 132.35, 130.94, 129.44, 127.55, 119.61, 69.24, 68.34, 17.73. IR (neat,  $\text{cm}^{-1}$ ): 3059, 1703, 1670, 1368, 1228, 751. HRMS ( $\text{M}+\text{H}^+$ ) calcd for  $\text{C}_{13}\text{H}_{12}\text{BrO}_3^+$ : 294.9964, found: 294.9968.

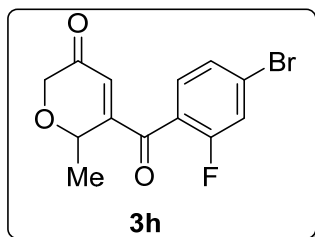

5-(4-bromo-2-fluorobenzoyl)-6-methyl-2H-pyran-3(6H)-one **3h** was prepared in 66% yield according to the general procedure B.  $^1\text{H}$  NMR (500 MHz,  $\text{CDCl}_3$ )  $\delta$  7.51 – 7.47 (m, 1H), 7.44 (dd,  $J = 8.3, 1.6$  Hz, 1H), 7.41 – 7.34 (m, 1H), 6.20 (s, 1H), 4.94 (q,  $J = 6.7$  Hz, 1H), 4.34 (dd,  $J = 16.7, 9.1$  Hz, 1H), 4.13 (dt,  $J = 14.1, 4.9$  Hz, 1H), 1.50 (d,  $J = 6.8$  Hz, 3H).  $^{13}\text{C}$  NMR (126 MHz,  $\text{CDCl}_3$ )  $\delta$  195.26, 191.92, 160.36 (d,  $J = 259.6$  Hz), 158.43, 131.76 (d,  $J = 2.4$  Hz), 128.62 (d,  $J = 9.5$  Hz), 128.40 (d,  $J = 3.6$  Hz), 128.20 (d,  $J = 3.3$  Hz), 123.75 (d,  $J = 12.7$  Hz), 120.43 (d,  $J = 24.8$  Hz), 69.78, 69.33, 17.98. IR (neat,  $\text{cm}^{-1}$ ): 3060, 1709, 1672, 1370, 1233, 755. HRMS ( $\text{M}+\text{H}^+$ ) calcd for  $\text{C}_{13}\text{H}_{11}\text{BrFO}_3^+$ : 312.9870, found: 312.9873.

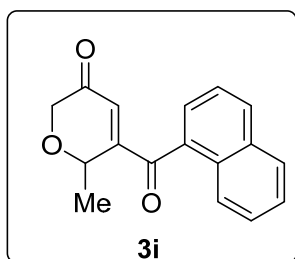

5-(1-naphthoyl)-6-methyl-2*H*-pyran-3(6*H*)-one **3i** was prepared in 66% yield according to the general procedure B. <sup>1</sup>H NMR (500 MHz, CDCl<sub>3</sub>) δ 8.44 (t, *J* = 15.4 Hz, 1H), 8.08 (t, *J* = 8.6 Hz, 1H), 7.96 – 7.88 (m, 1H), 7.72 (dt, *J* = 7.8, 3.9 Hz, 1H), 7.67 – 7.56 (m, 2H), 7.57 – 7.48 (m, 1H), 6.22 (d, *J* = 1.7 Hz, 1H), 5.08 (q, *J* = 6.7 Hz, 1H), 5.08 (q, *J* = 6.7 Hz, 1H), 4.39 (d, *J* = 16.8 Hz, 1H), 4.26 – 4.14 (m, 1H), 1.60 (d, *J* = 6.8 Hz, 3H). <sup>13</sup>C NMR (126 MHz, CDCl<sub>3</sub>) δ 197.20, 195.54, 159.71, 133.90, 133.75, 132.98, 130.70, 130.27, 129.32, 128.67, 128.40, 126.96, 125.13, 124.13, 70.16, 69.45, 18.08. IR (neat, cm<sup>-1</sup>): 3054, 1698, 1656, 1234, 1140, 782. HRMS (M+H<sup>+</sup>) calcd for C<sub>17</sub>H<sub>15</sub>O<sub>3</sub><sup>+</sup>: 267.1016, found: 267.1019.

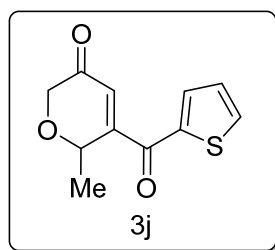

6-methyl-5-(thiophene-2-carbonyl)-2*H*-pyran-3(6*H*)-one **3j** was prepared in 70% yield according to the general procedure B. <sup>1</sup>H NMR (500 MHz, CDCl<sub>3</sub>) δ 7.93 – 7.77 (m, 1H), 7.71 (dd, *J* = 3.8, 0.9 Hz, 1H), 7.24 – 7.16 (m, 1H), 6.40 (d, *J* = 1.8 Hz, 1H), 4.92 (q, *J* = 6.9 Hz, 1H), 4.36 (d, *J* = 16.6 Hz, 1H), 4.17 (dd, *J* = 16.6, 1.2 Hz, 1H), 1.44 (d, *J* = 6.8 Hz, 3H). <sup>13</sup>C NMR (126 MHz, CDCl<sub>3</sub>) δ 194.72, 186.28, 158.88, 142.06, 136.60, 135.32, 128.61, 126.48, 70.59, 70.16, 18.16. IR (neat, cm<sup>-1</sup>): 3055, 1698, 1659, 1508, 1230, 1140, 897, 780. HRMS (M+H<sup>+</sup>) calcd for C<sub>11</sub>H<sub>11</sub>O<sub>3</sub><sup>+</sup>: 223.0423, found: 223.0425.

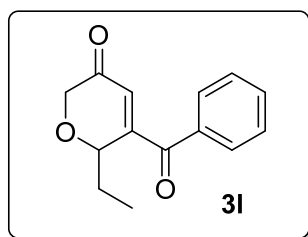

5-benzoyl-6-ethyl-2*H*-pyran-3(6*H*)-one **3i** was prepared in 76% yield according to the general procedure B. <sup>1</sup>H NMR (500 MHz, CDCl<sub>3</sub>) δ 7.97 – 7.88 (m, 2H), 7.70 (t, *J* = 7.4 Hz, 1H), 7.56 (t, *J* = 7.8 Hz, 2H), 6.30 (d, *J* = 1.8 Hz, 1H), 4.93 – 4.77 (m, 1H), 4.42 (dd, *J* = 16.8, 6.7 Hz, 1H), 4.22 (dt, *J* = 7.3, 3.3 Hz, 1H), 1.95 – 1.80 (m, 2H), 1.07 (t, *J* = 7.4 Hz, 3H). <sup>13</sup>C NMR (126 MHz, CDCl<sub>3</sub>) δ 195.08, 194.92, 158.27, 134.98, 134.19, 129.74, 128.88, 128.13, 75.28,

69.82, 25.04, 9.99. IR (neat,  $\text{cm}^{-1}$ ): 3058, 1698, 1658, 1249, 1134, 725. HRMS ( $\text{M}+\text{H}^+$ ) calcd for  $\text{C}_{14}\text{H}_{15}\text{O}_3^+$ : 231.1016, found: 231.1018.

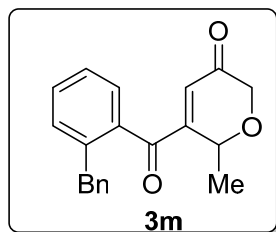

5-(2-benzylbenzoyl)-6-methyl-2H-pyran-3(6H)-one **3m** was prepared in 55% yield according to the general procedure B.  $^1\text{H}$  NMR (500 MHz,  $\text{CDCl}_3$ )  $\delta$  7.49 – 7.43 (m, 1H), 7.34 – 7.28 (m, 3H), 7.21 (t,  $J = 7.5$  Hz, 2H), 7.13 (t,  $J = 7.4$  Hz, 1H), 7.05 (t,  $J = 6.9$  Hz, 2H), 5.91 (d,  $J = 1.6$  Hz, 1H), 4.85 (q,  $J = 6.6$  Hz, 1H), 4.23 (dd,  $J = 25.9, 16.1$  Hz, 2H), 4.15 – 4.01 (m, 2H), 1.44 (d,  $J = 6.8$  Hz, 3H).  $^{13}\text{C}$  NMR (126 MHz,  $\text{CDCl}_3$ )  $\delta$  198.14, 195.76, 157.95, 141.21, 140.05, 136.29, 131.70, 131.67, 130.10, 129.26, 128.40, 126.24, 126.01, 69.41, 68.63, 38.95, 17.87. IR (neat,  $\text{cm}^{-1}$ ): 2977, 1698, 1658, 1230, 1079, 780. HRMS ( $\text{M}+\text{H}^+$ ) calcd for  $\text{C}_{20}\text{H}_{19}\text{O}_3^+$ : 307.1329, found: 307.1332.

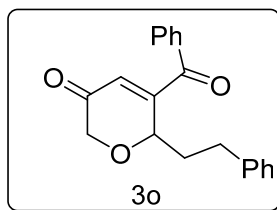

5-benzoyl-6-phenethyl-2H-pyran-3(6H)-one **3o** was prepared in 30% yield according to the general procedure B with Mor-DalPhosAuNTf<sub>2</sub> as the catalyst.  $^1\text{H}$  NMR (500 MHz,  $\text{CDCl}_3$ )  $\delta$  7.89 – 7.81 (m, 2H), 7.68 – 7.60 (m, 1H), 7.50 (dd,  $J = 10.7, 4.9$  Hz, 2H), 7.26 (dd,  $J = 10.2, 4.7$  Hz, 2H), 7.20 – 7.17 (m, 1H), 7.15 (dd,  $J = 6.1, 4.9$  Hz, 2H), 6.27 (d,  $J = 1.9$  Hz, 1H), 4.83 (ddd,  $J = 19.0, 9.2, 7.2$  Hz, 1H), 4.41 (d,  $J = 16.7$  Hz, 1H), 4.27 – 4.12 (m, 1H), 2.94 – 2.70 (m, 2H), 2.14 – 1.98 (m, 2H).  $^{13}\text{C}$  NMR (126 MHz,  $\text{CDCl}_3$ )  $\delta$  194.87, 194.82, 158.04, 140.75, 134.97, 134.26, 129.72, 128.91, 128.47, 128.44, 128.11, 126.14, 73.49, 69.83, 33.44, 31.70. IR (neat,  $\text{cm}^{-1}$ ): 2934, 1698, 1659, 1232, 1135, 781. HRMS ( $\text{M}+\text{H}^+$ ) calcd for  $\text{C}_{20}\text{H}_{19}\text{O}_3^+$ : 307.1329, found: 307.1332.

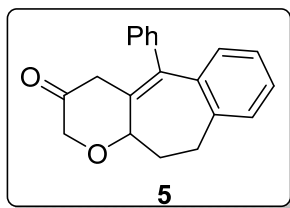

5-phenyl-4,10,11,11a-tetrahydrobenzo[4,5]cyclohepta[1,2-b]pyran-3(2H)-one **5** was prepared in 30% yield according to the general procedure **B** with Mor-DalPhosAuNTf<sub>2</sub> as the catalyst. <sup>1</sup>H NMR (500 MHz, CDCl<sub>3</sub>) δ 7.36 (t, *J* = 7.3 Hz, 2H), 7.32 – 7.30 (m, 1H), 7.28 (d, *J* = 8.3 Hz, 1H), 7.18 (td, *J* = 7.4, 1.2 Hz, 1H), 7.13 – 7.06 (m, 3H), 6.74 (dd, *J* = 7.7, 0.9 Hz, 1H), 4.19 (d, *J* = 17.9 Hz, 1H), 4.16 – 4.07 (m, 1H), 3.81 (d, *J* = 17.9 Hz, 1H), 3.57 (dd, *J* = 14.7, 1.1 Hz, 1H), 3.46 (d, *J* = 14.7 Hz, 1H), 3.07 – 2.93 (m, 1H), 2.81 – 2.62 (m, 2H), 2.41 (tt, *J* = 16.5, 8.4 Hz, 1H). <sup>13</sup>C NMR (126 MHz, CDCl<sub>3</sub>) δ 209.77, 140.46, 140.43, 139.85, 137.91, 129.98, 129.66, 129.46, 128.40, 128.36, 127.45, 127.33, 126.28, 77.00, 72.55, 41.83, 40.38, 30.19. IR (neat, cm<sup>-1</sup>): 2948, 1729, 1222, 1109, 732. HRMS (M+H<sup>+</sup>) calcd for C<sub>20</sub>H<sub>19</sub>O<sub>2</sub><sup>+</sup>: 291.1380, found: 291.1383.

**General procedure C: gold catalyzed selective oxidation of 4-Oxahepta-1,6-diyne derivatives 1a-1ah to chromen-3(4H)-ones 4**

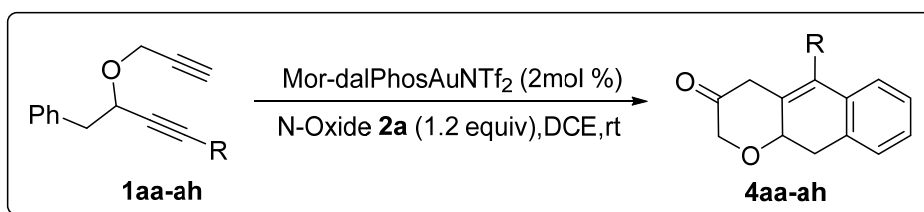

To a 3 dram vial containing 2 mL of DCE were added sequentially the 4-Oxahepta-1,6-diyne **1aa-ah** (0.1 mmol), 2,6-dichloropyridine *N*-oxide **2a** (20 mg, 0.24 mmol), Mor-DalPhosAuNTf<sub>2</sub> (1.8 mg, 0.002 mmol). The resulting mixture was stirred at 25 °C or the indicated temperature, and the progress of the reaction was monitored by TLC. Upon completion, the reaction mixture was concentrated under vacuum. The residue was purified by chromatography on silica gel (eluent: hexanes/ethyl acetate) to afford the desired chromen-3(4H)-ones **4aa-ah**.

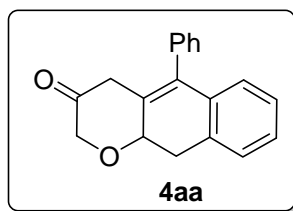

5-phenyl-10,10a-dihydro-2H-benzo[g]chromen-3(4H)-one **4aa** was prepared in 63% yield according to the general procedure C.  $^1\text{H}$  NMR (500 MHz,  $\text{CDCl}_3$ )  $\delta$  7.48 (t,  $J = 7.5$  Hz, 2H), 7.43 – 7.41 (m, 1H), 7.29 (d,  $J = 7.4$  Hz, 1H), 7.19 (td,  $J = 7.4, 1.1$  Hz, 3H), 7.12 (dd,  $J = 13.3, 5.8$  Hz, 1H), 6.72 (d,  $J = 7.6$  Hz, 1H), 4.80 – 4.71 (m, 1H), 4.48 – 4.37 (m, 1H), 4.07 (d,  $J = 18.0$  Hz, 1H), 3.42 – 3.28 (m, 3H), 3.10 (dd,  $J = 16.5, 10.0$  Hz, 1H).  $^{13}\text{C}$  NMR (126 MHz,  $\text{CDCl}_3$ )  $\delta$  208.27, 137.10, 135.62, 135.47, 132.87, 129.72, 129.49, 128.81, 128.10, 127.56, 127.20, 127.03, 126.06, 75.28, 72.48, 41.36, 33.68. IR (neat,  $\text{cm}^{-1}$ ): 2948, 1728, 1220, 1108, 717. HRMS ( $\text{M}+\text{H}^+$ ) calcd for  $\text{C}_{19}\text{H}_{17}\text{O}_2^+$ : 277.1223, found: 277.1228.

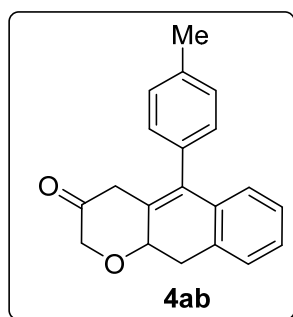

5-(p-tolyl)-10,10a-dihydro-2H-benzo[g]chromen-3(4H)-one **4ab** was prepared in 58% yield according to the general procedure C.  $^1\text{H}$  NMR (500 MHz,  $\text{CDCl}_3$ )  $\delta$  7.26 (dd,  $J = 15.6, 7.6$  Hz, 3H), 7.18 (td,  $J = 7.4, 1.0$  Hz, 1H), 7.12 (t,  $J = 7.5$  Hz, 1H), 7.07 (d,  $J = 6.4$  Hz, 2H), 6.75 (d,  $J = 7.5$  Hz, 1H), 4.74 (td,  $J = 14.7, 4.6$  Hz, 1H), 4.42 (d,  $J = 17.9$  Hz, 1H), 4.08 (dd,  $J = 21.3, 13.2$  Hz, 1H), 3.40 – 3.35 (m, 2H), 3.32 (dd,  $J = 16.8, 12.5$  Hz, 1H), 3.17 – 3.03 (m, 1H), 2.45 (s, 3H).  $^{13}\text{C}$  NMR (126 MHz,  $\text{CDCl}_3$ )  $\delta$  208.37, 137.20, 135.62, 135.57, 134.02, 132.88, 129.57, 129.47, 129.36, 128.05, 127.12, 126.98, 126.07, 75.29, 72.41, 41.37, 33.65, 21.21. IR (neat,  $\text{cm}^{-1}$ ): 2949, 1729, 1220, 1109, 732. HRMS ( $\text{M}+\text{H}^+$ ) calcd for  $\text{C}_{20}\text{H}_{19}\text{O}_2^+$ : 291.1380, found: 291.1383.

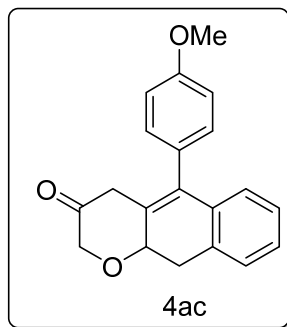

5-(4-methoxyphenyl)-10,10a-dihydro-2H-benzo[g]chromen-3(4H)-one **4ac** was prepared in 56% yield according to the general procedure C. <sup>1</sup>H NMR (500 MHz, CDCl<sub>3</sub>) δ 7.28 – 7.23 (m, 1H), 7.18 (t, *J* = 7.1 Hz, 1H), 7.14 – 7.05 (m, 3H), 7.05 – 6.98 (m, 2H), 6.74 (dd, *J* = 15.2, 4.7 Hz, 1H), 4.75 (dt, *J* = 17.7, 8.9 Hz, 1H), 4.40 (dd, *J* = 16.8, 12.5 Hz, 1H), 4.06 (d, *J* = 17.9 Hz, 1H), 3.90 (s, 3H), 3.41 – 3.35 (m, 2H), 3.34 – 3.25 (m, 1H), 3.08 (dt, *J* = 20.2, 10.1 Hz, 1H). <sup>13</sup>C NMR (126 MHz, CDCl<sub>3</sub>) δ 208.43, 158.94, 135.74, 135.26, 132.90, 130.66, 129.73, 129.19, 128.07, 127.13, 127.00, 126.06, 114.22, 75.29, 72.35, 55.28, 41.41, 33.61. IR (neat, cm<sup>-1</sup>): 3024, 1731, 1220, 1109, 732. HRMS (M+H<sup>+</sup>) calcd for C<sub>20</sub>H<sub>19</sub>O<sub>3</sub><sup>+</sup>: 307.1329, found: 307.1332.

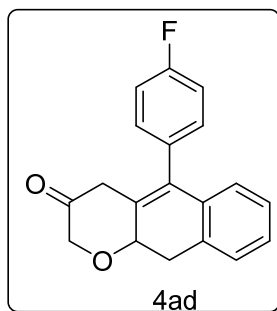

5-(4-fluorophenyl)-10,10a-dihydro-2H-benzo[g]chromen-3(4H)-one **4ad** was prepared in 55% yield according to the general procedure C. <sup>1</sup>H NMR (500 MHz, CDCl<sub>3</sub>) δ 7.29 (d, *J* = 7.4 Hz, 1H), 7.24 – 7.11 (m, 6H), 6.69 (d, *J* = 7.6 Hz, 1H), 4.75 (dd, *J* = 14.7, 6.4 Hz, 1H), 4.48 – 4.37 (m, 1H), 4.07 (d, *J* = 18.0 Hz, 1H), 3.42 – 3.26 (m, 3H), 3.17 – 3.06 (m, 1H). <sup>13</sup>C NMR (126 MHz, CDCl<sub>3</sub>) δ 208.02, 162.20 (d, *J* = 246.8 Hz), 135.33, 134.64, 132.91 (d, *J* = 3.7 Hz), 132.87, 131.22 (d, *J* = 8.0 Hz), 130.34, 128.19, 127.36, 127.08, 125.89, 75.23, 72.46, 41.38, 33.59. IR (neat, cm<sup>-1</sup>): 2970, 1733, 1229, 1200, 702. HRMS (M+H<sup>+</sup>) calcd for C<sub>19</sub>H<sub>16</sub>FO<sub>2</sub><sup>+</sup>: 295.1129, found: 295.1132.



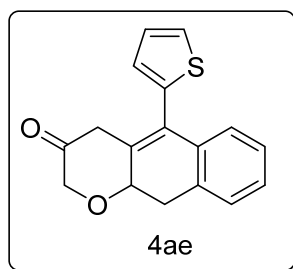

5-(thiophen-2-yl)-10,10a-dihydro-2H-benzo[g]chromen-3(4H)-one **4ae** was prepared in 76% yield according to the general procedure C.  $^1\text{H}$  NMR (500 MHz,  $\text{CDCl}_3$ )  $\delta$  7.44 (t,  $J = 8.0$  Hz, 1H), 7.26 (t,  $J = 8.4$  Hz, 1H), 7.18 (ddd,  $J = 10.1, 8.5, 5.5$  Hz, 3H), 6.94 (t,  $J = 4.8$  Hz, 2H), 4.73 (dd,  $J = 14.8, 6.5$  Hz, 1H), 4.42 (d,  $J = 18.0$  Hz, 1H), 4.06 (d,  $J = 18.0$  Hz, 1H), 3.56 – 3.45 (m, 2H), 3.38 – 3.25 (m, 1H), 3.17 – 3.02 (m, 1H).  $^{13}\text{C}$  NMR (126 MHz,  $\text{CDCl}_3$ )  $\delta$  207.73, 137.14, 135.33, 133.86, 132.46, 128.42, 128.03, 127.77, 127.48, 127.28, 127.19, 126.21, 125.83, 75.34, 72.54, 41.60, 33.42. IR (neat,  $\text{cm}^{-1}$ ): 2949, 1730, 1360, 1227, 1110, 701. HRMS ( $\text{M}+\text{H}^+$ ) calcd for  $\text{C}_{17}\text{H}_{15}\text{O}_2\text{S}^+$ : 238.0787, found: 238.0791.

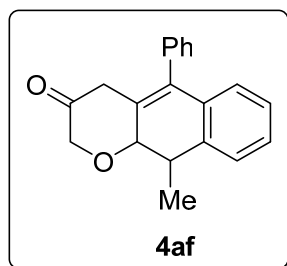

10-methyl-5-phenyl-10,10a-dihydro-2H-benzo[g]chromen-3(4H)-one **4af** was prepared in 75% yield according to the general procedure C.  $^1\text{H}$  NMR (500 MHz,  $\text{CDCl}_3$ )  $\delta$  7.44 (ddd,  $J = 18.3, 14.9, 7.4$  Hz, 4H), 7.27 (t,  $J = 7.1$  Hz, 1H), 7.16 (qt,  $J = 10.4, 5.0$  Hz, 3H), 6.75 (dd,  $J = 17.7, 9.4$  Hz, 1H), 4.44 (dd,  $J = 18.0, 14.2$  Hz, 1H), 4.30 (dd,  $J = 16.6, 8.8$  Hz, 1H), 4.05 (d,  $J = 18.0$  Hz, 1H), 3.44 – 3.31 (m, 3H), 1.59 (t,  $J = 11.6$  Hz, 3H).  $^{13}\text{C}$  NMR (126 MHz,  $\text{CDCl}_3$ )  $\delta$  208.70, 137.40, 137.24, 135.54, 135.32, 129.68, 129.60, 128.77, 127.53, 127.45, 126.67, 126.06, 124.97, 122.85, 80.03, 72.05, 41.55, 36.04, 14.06. IR (neat,  $\text{cm}^{-1}$ ): 2949, 1728, 1218, 1109, 733. HRMS ( $\text{M}+\text{H}^+$ ) calcd for  $\text{C}_{20}\text{H}_{19}\text{O}_2^+$ : 291.1380, found: 291.1383.

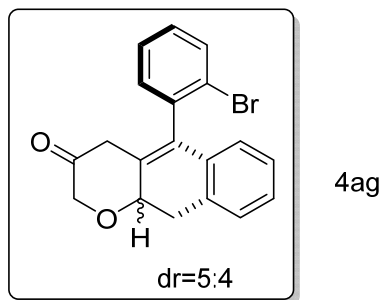

5-(2-bromophenyl)-10,10a-dihydro-2H-benzo[g]chromen-3(4H)-one **4ag** was prepared in 45% yield with dr=5:4 according to the general procedure C.  $^1\text{H}$  NMR (500 MHz,  $\text{CDCl}_3$ )  $\delta$  7.71 (ddd,  $J = 24.8, 12.4, 4.6$  Hz, 1H), 7.50 – 7.36 (m, 1H), 7.30 – 7.08 (m, 5H), 6.58 (dt,  $J = 37.8, 19.0$  Hz, 1H), 4.88 – 4.68 (m, 1H), 4.53 – 4.36 (m, 1H), 4.08 (dd,  $J = 17.9, 14.6$  Hz, 1H), 3.48 – 3.09 (m, 4H).  $^{13}\text{C}$  NMR (126 MHz,  $\text{CDCl}_3$ )  $\delta$  207.89, 207.43, 137.93, 137.49, 134.59, 134.35, 134.04, 133.32, 133.01, 132.87, 132.66, 131.38, 131.15, 131.07, 130.76, 129.45, 129.42, 128.21, 128.18, 128.05, 127.75, 127.37, 127.35, 127.20, 127.13, 125.57, 124.82, 124.21, 124.01, 75.13, 75.10, 72.78, 72.72, 41.38, 41.06, 33.71, 33.59. IR (neat,  $\text{cm}^{-1}$ ): 2857, 1733, 1732, 1227, 1198, 764. HRMS ( $\text{M}+\text{H}^+$ ) calcd for  $\text{C}_{19}\text{H}_{16}\text{BrO}_2^+$ : 355.0328, found: 355.0331.

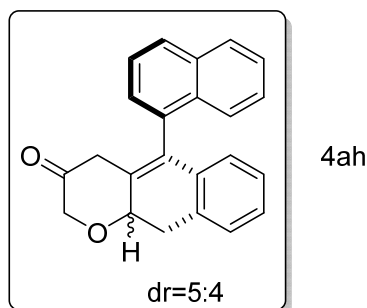

5-(naphthalen-1-yl)-10,10a-dihydro-2H-benzo[g]chromen-3(4H)-one **4ah** was prepared in 81% yield with dr=5:4 according to the general procedure C.  $^1\text{H}$  NMR (500 MHz,  $\text{CDCl}_3$ )  $\delta$  8.01 – 7.91 (m, 2H), 7.73 – 7.54 (m, 3H), 7.53 – 7.44 (m, 1H), 7.41 – 7.29 (m, 2H), 7.25 – 7.13 (m, 1H), 7.09 – 6.96 (m, 1H), 6.54 (dd,  $J = 57.0, 7.7$  Hz, 1H), 5.00 – 4.77 (m, 1H), 4.50 – 4.40 (m, 1H), 4.10 (dd,  $J = 17.9, 4.6$  Hz, 1H), 3.56 – 3.36 (m, 1H), 3.33 – 3.17 (m, 2H), 3.09 – 2.87 (m, 1H).  $^{13}\text{C}$  NMR (126 MHz,  $\text{CDCl}_3$ )  $\delta$  208.01, 207.83, 135.52, 135.16, 134.81, 134.14, 134.01, 133.72, 133.65, 133.56, 132.63, 132.42, 131.78, 131.63, 131.48, 131.42, 128.58, 128.48, 128.21, 128.16, 128.09, 128.03, 127.28, 127.21, 127.16, 127.04, 126.73, 126.37, 126.18, 126.06, 125.87, 125.62, 125.57, 125.14, 124.88, 75.53, 75.22, 73.13, 72.77, 41.39, 41.12,

34.21, 33.90. IR (neat,  $\text{cm}^{-1}$ ): 3028, 1729, 1728, 1234, 1100, 702. HRMS ( $\text{M}+\text{H}^+$ ) calcd for  $\text{C}_{23}\text{H}_{19}\text{O}_2^+$ : 327.1380, found: 327.1382.

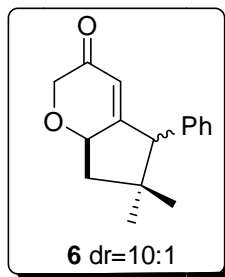

6,6-dimethyl-5-phenyl-5,6,7,7a-tetrahydrocyclopenta[b]pyran-3(2H)-one **6** was prepared in 80% yield according to the general procedure C.  $^1\text{H}$  NMR (500 MHz,  $\text{CDCl}_3$ )  $\delta$  7.52 – 7.26 (m, 3H), 7.16 (dd,  $J = 20.0, 6.3$  Hz, 2H), 6.12 (d,  $J = 177.8$  Hz, 1H), 4.82 (d,  $J = 31.9$  Hz, 1H), 4.37 (d,  $J = 16.7$  Hz, 1H), 4.26 – 4.09 (m, 1H), 3.99 – 3.53 (m, 1H), 2.21 (dd,  $J = 21.0, 12.7$  Hz, 1H), 1.91 – 1.75 (m, 1H), 1.28 (d,  $J = 19.7$  Hz, 3H), 0.75-0.72 (m, 3H).  $^{13}\text{C}$  NMR (126 MHz,  $\text{CDCl}_3$ )  $\delta$  195.07, 174.17, 137.67, 129.13, 128.34, 127.12, 122.30, 77.98, 77.25, 77.00, 76.75, 72.87, 60.08, 44.73, 41.30, 28.62, 24.42. IR (neat,  $\text{cm}^{-1}$ ): 2970, 1700, 1591, 1248, 722. HRMS ( $\text{M}+\text{H}^+$ ) calcd for  $\text{C}_{16}\text{H}_{19}\text{O}_2^+$ : 243.1380, found: 243.1382.

#### X-ray structure of **5**

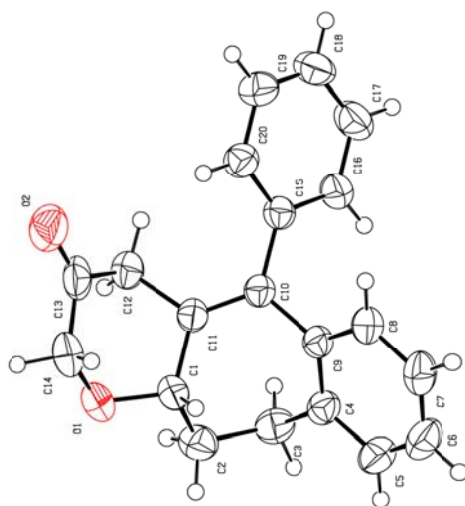

|                 |                |                    |
|-----------------|----------------|--------------------|
| Bond precision: | C-C = 0.0030 Å | Wavelength=0.71073 |
| Cell:           | a=15.2594(7)   | b=10.4298(5)       |
|                 | alpha=90       | beta=90            |
|                 |                | gamma=90           |
| Temperature:    | 294 K          |                    |
|                 | Calculated     | Reported           |

|                |             |             |
|----------------|-------------|-------------|
| Volume         | 3093.2(3)   | 3093.2(3)   |
| Space group    | P b c a     | P b c a     |
| Hall group     | -P 2ac 2ab  | -P 2ac 2ab  |
| Moiety formula | C20 H18 O2  | C20 H18 O2  |
| Sum formula    | C20 H18 O2  | C20 H18 O2  |
| Mr             | 290.34      | 290.34      |
| Dx,g cm-3      | 1.247       | 1.247       |
| Z              | 8           | 8           |
| Mu (mm-1)      | 0.079       | 0.079       |
| F000           | 1232.0      | 1232.0      |
| F000'          | 1232.55     |             |
| h,k,lmax       | 18,12,23    | 18,12,23    |
| Nref           | 3039        | 3032        |
| Tmin,Tmax      | 0.973,0.976 | 0.686,1.000 |
| Tmin'          | 0.973       |             |

Correction method= # Reported T Limits: Tmin=0.686 Tmax=1.000 AbsCorr =  
MULTI-SCAN

Data completeness= 0.998

Theta(max)= 26.020

R(reflections)= 0.0536( 2077)

wR2(reflections)= 0.1393( 3032)

S = 1.069

Npar= 199

### Reference:

1. T. C. Johnson , G. J. Clarkson , and M. Wills *Organometallics*, **2011**, 30 ,1859–1868

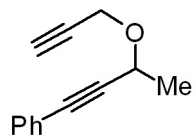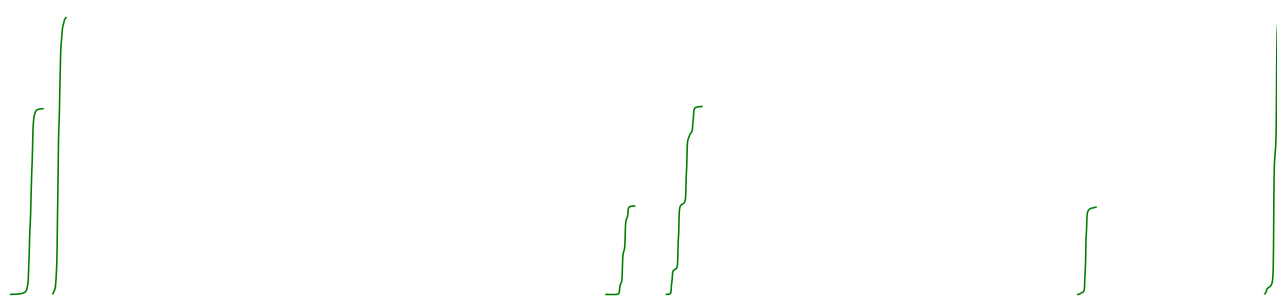

D (m)  
7.31  
C (m)  
7.45  
HH

B (m)  
4.36  
A (q)  
4.64  
HH

E (m)  
2.47  
H

F (d)  
1.56  
H

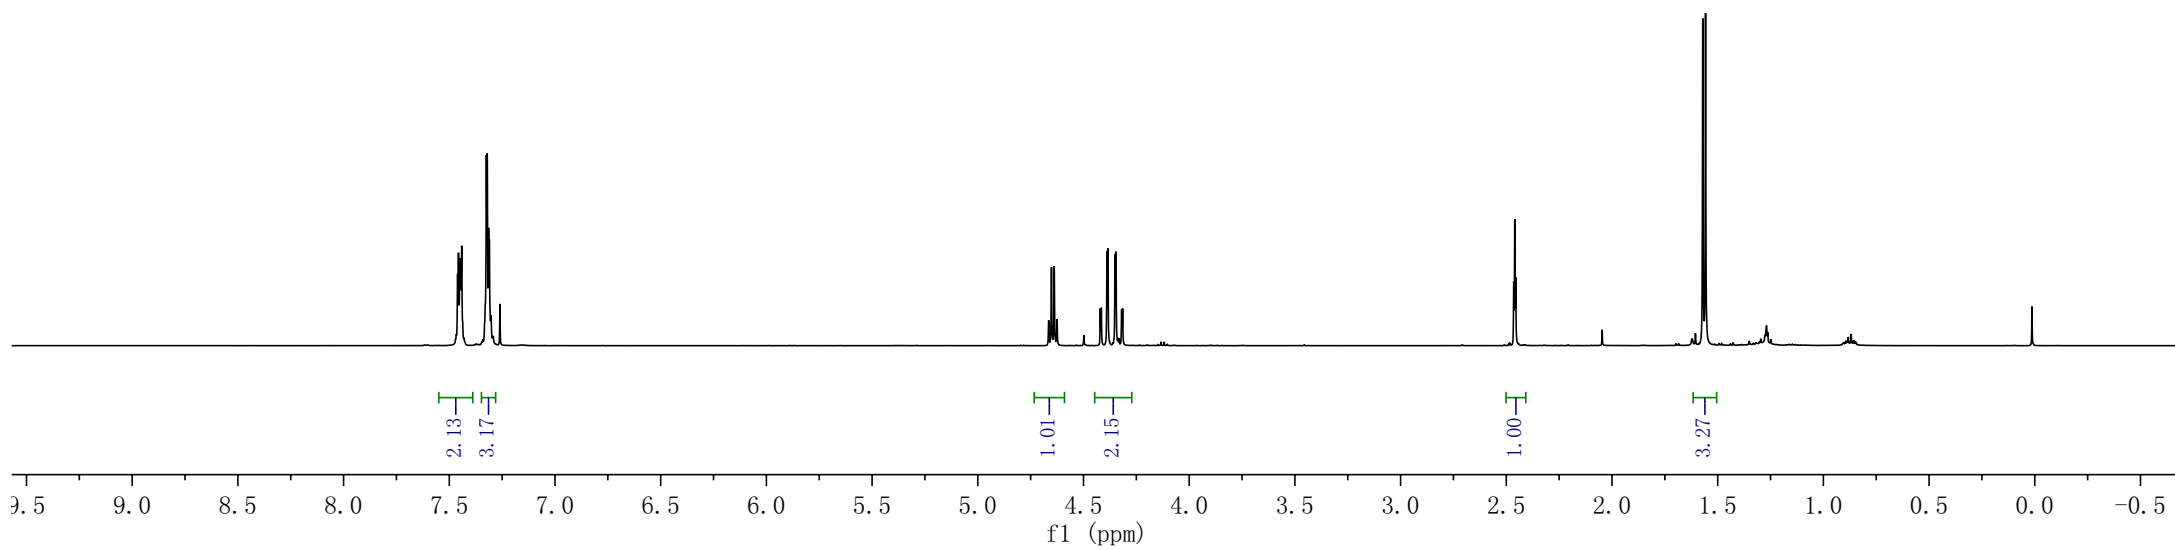

131.71  
128.41  
128.23  
122.44

87.89  
85.61  
79.55  
77.25  
77.00  
76.75  
74.40  
64.59  
55.72

21.98

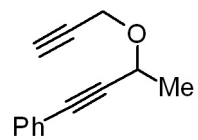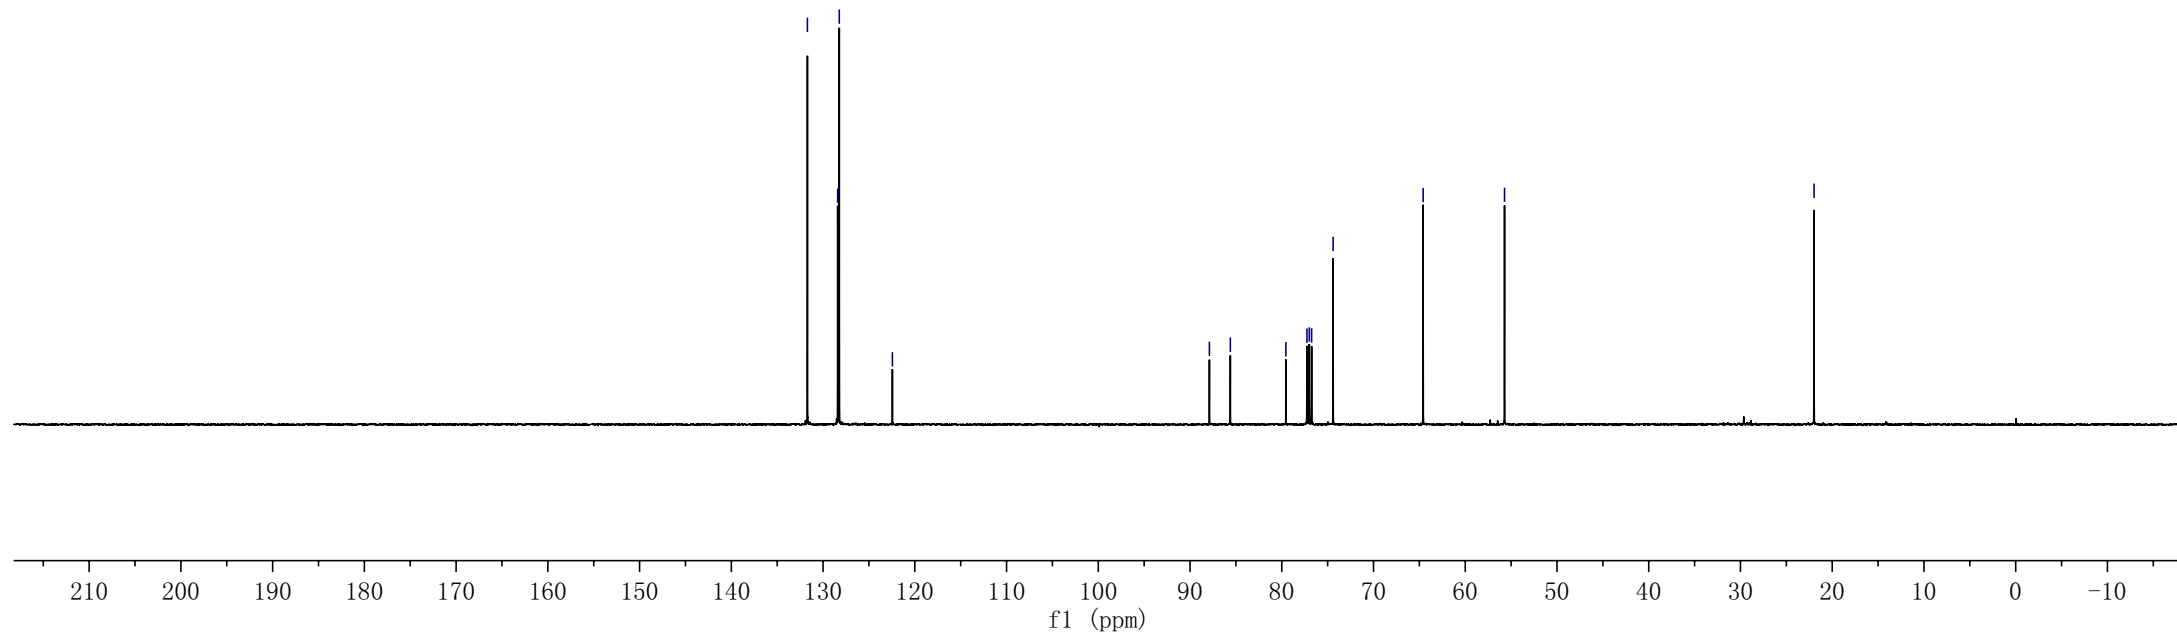



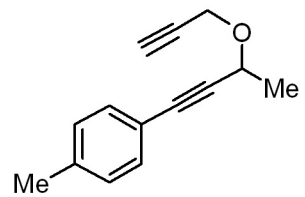

138.55  
131.65  
131.62  
129.00  
119.38  
87.17  
85.76  
79.64  
77.25  
77.00  
76.75  
74.34  
64.67  
55.69  
22.04  
21.42

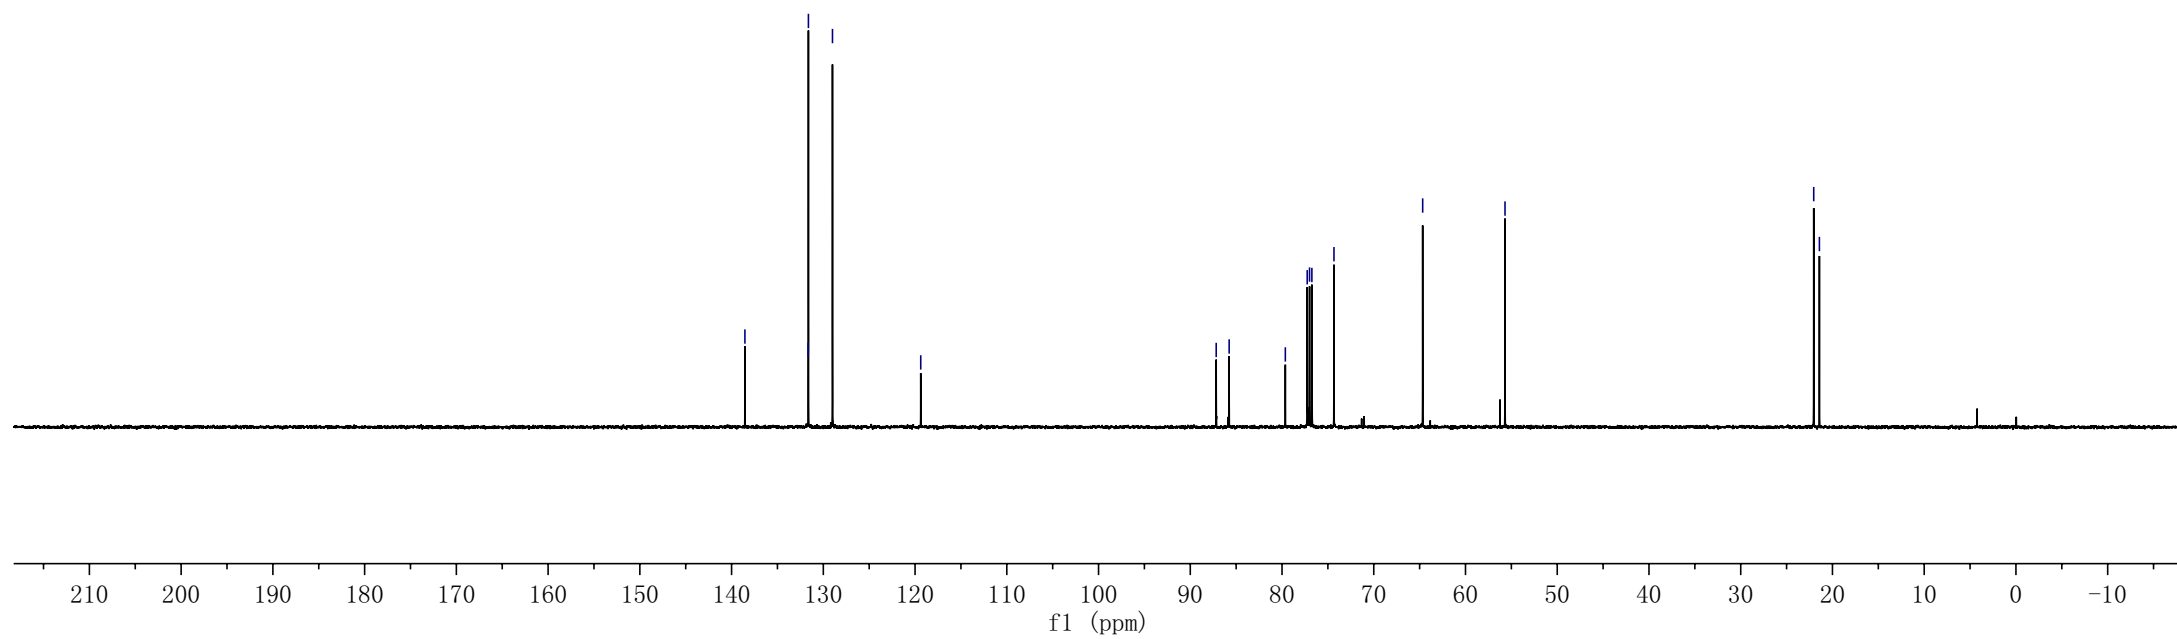



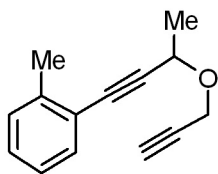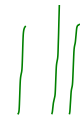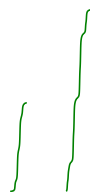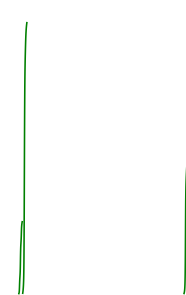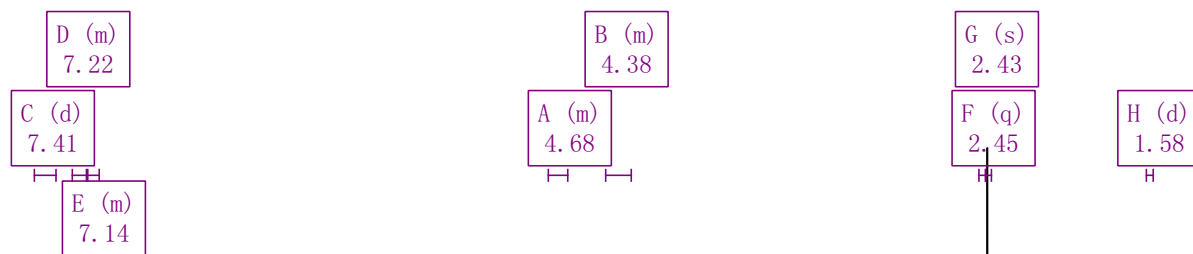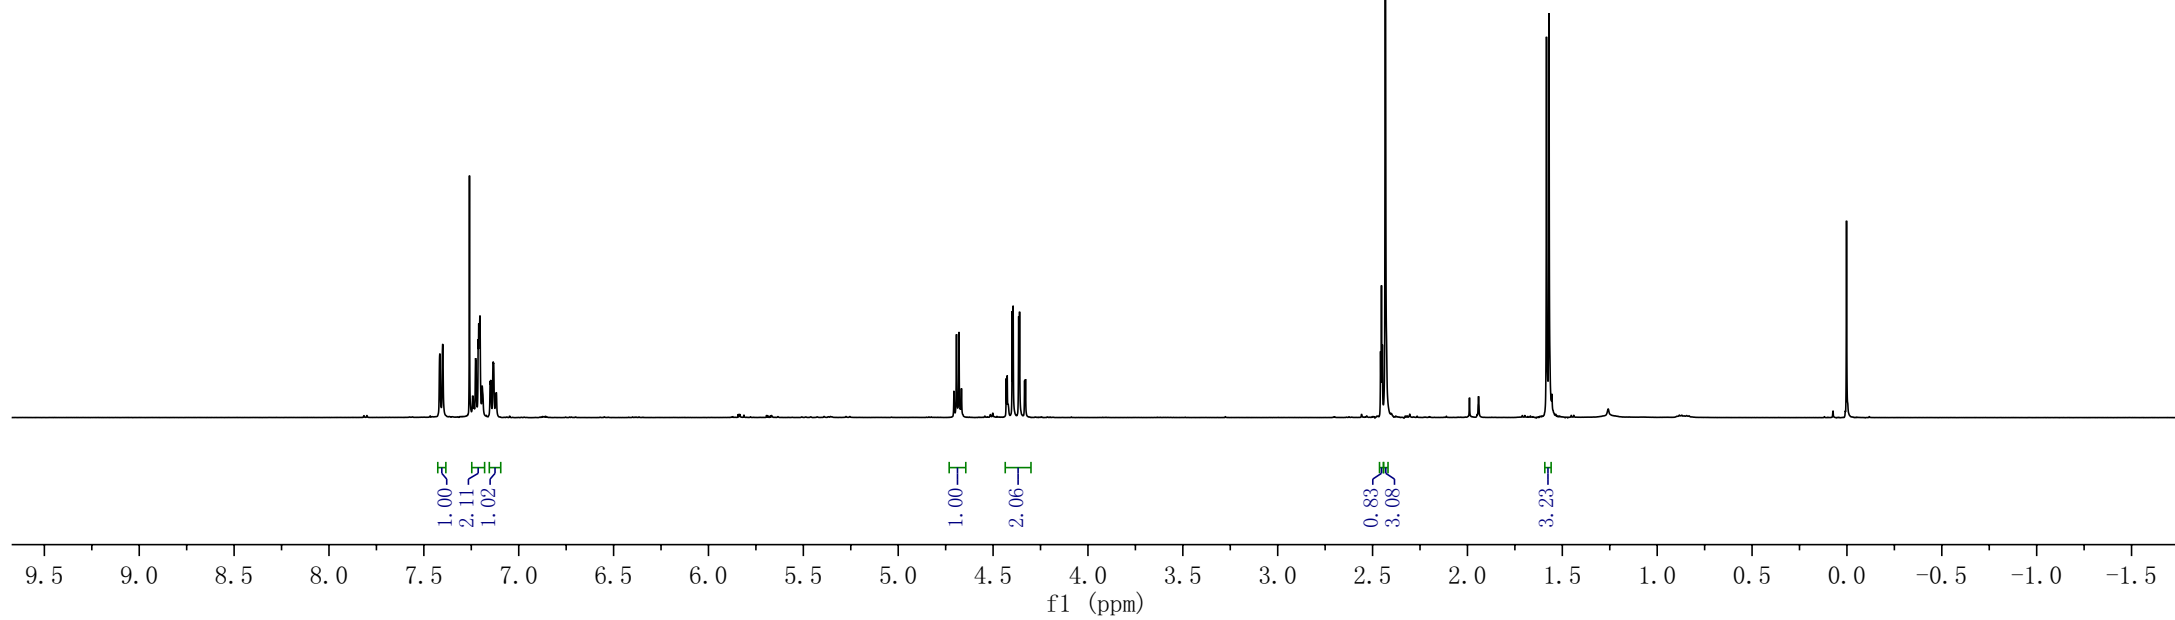

JKG-20150311-I-52B  
C13 NMR (CDCl<sub>3</sub>, 125 MHz, 25 °C) { 2015-1 } ZHL 18

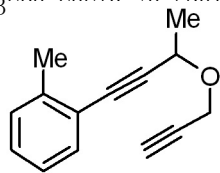

140.23

132.03

129.41

128.46

125.51

122.24

91.84

84.54

77.25

77.00

76.75

74.41

64.71

55.72

22.18

20.68

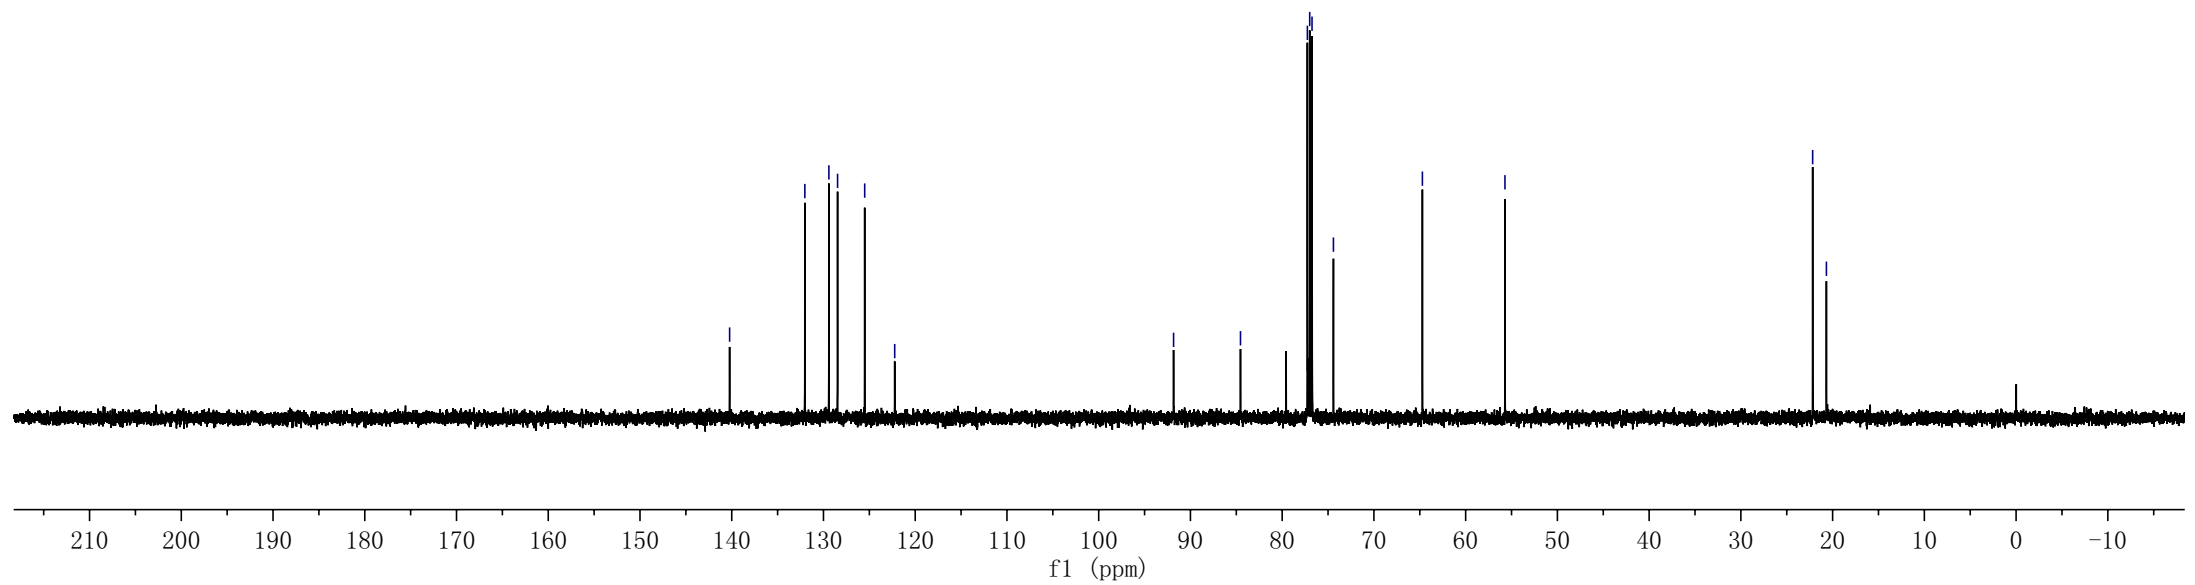

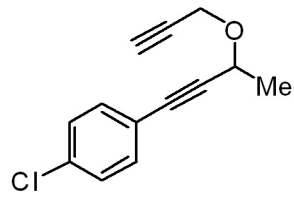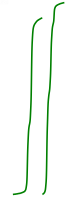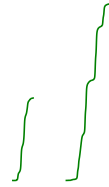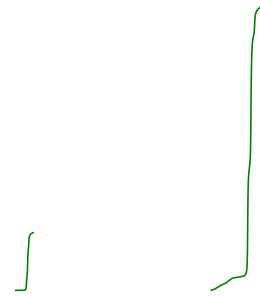

F (dd)  
7.28  
E (t)  
7.35

B (m)  
4.35  
A (m)  
4.61

C (t)  
2.46

D (t)  
1.54

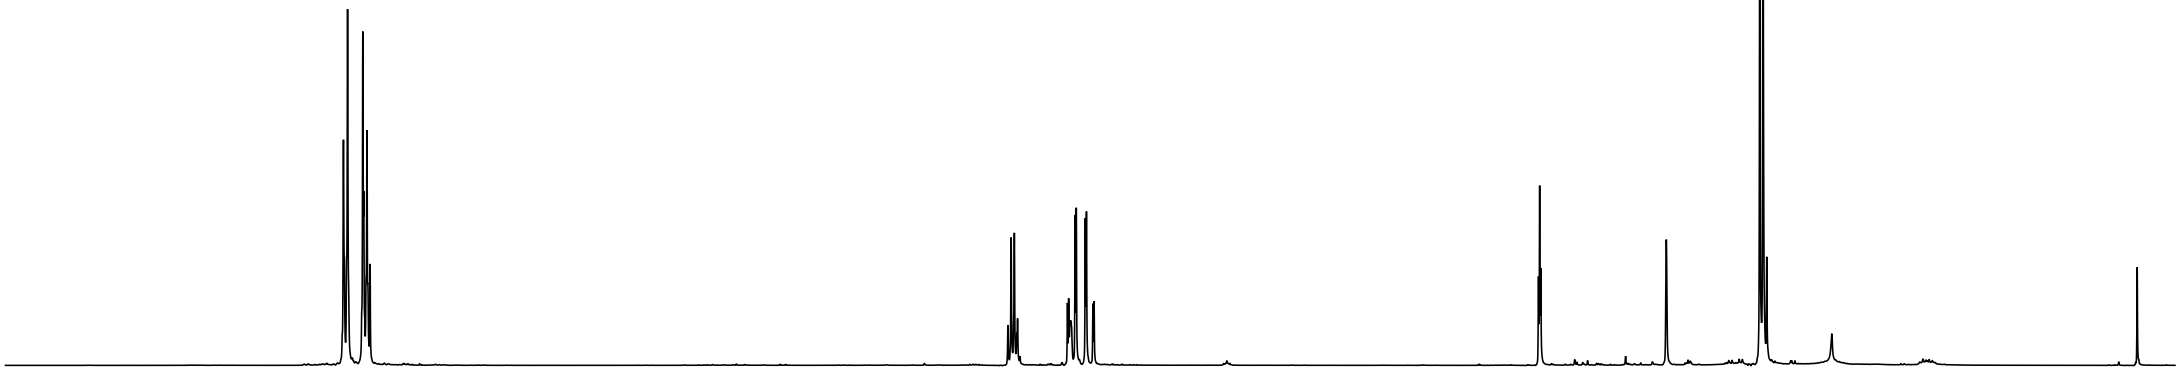

2.14  
2.32

1.00  
2.14

0.70

3.46

8.5 8.0 7.5 7.0 6.5 6.0 5.5 5.0 4.5 4.0 3.5 3.0 2.5 2.0 1.5 1.0 0.5 0.0  
f1 (ppm)

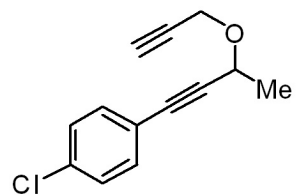

134.50  
132.98  
132.95  
128.60  
128.58  
120.94

88.94  
84.49  
79.45  
77.25  
77.00  
76.75  
74.52  
64.54  
55.80

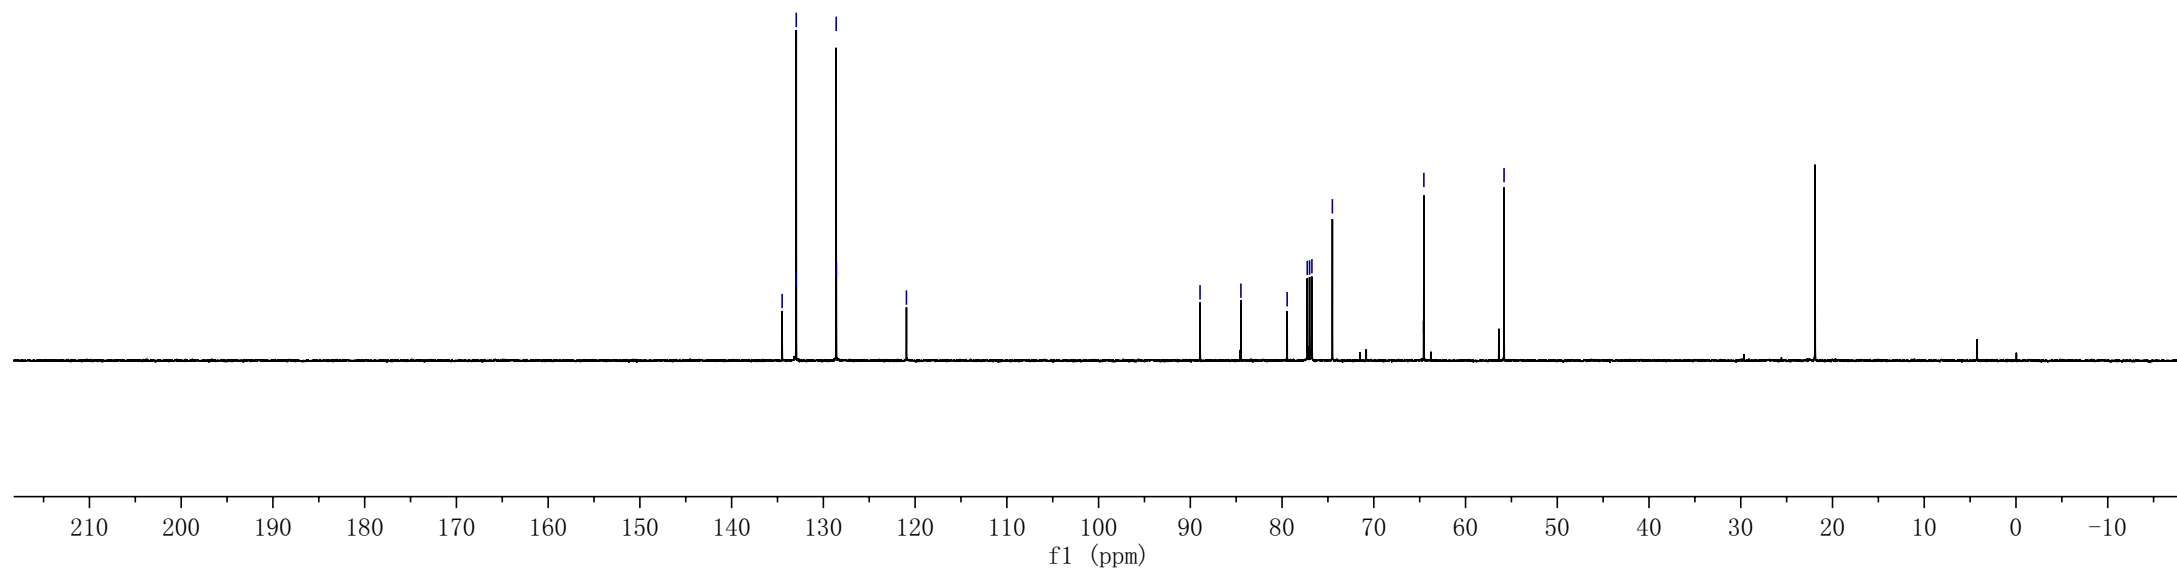

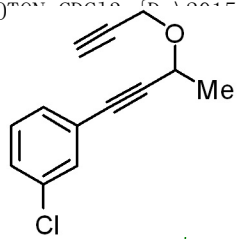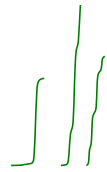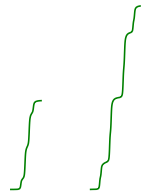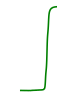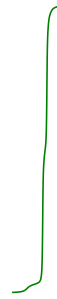

F (m)  
7.31

E (t)  
7.44

G (dd)  
7.25

A (q)  
4.63

B (ddd)  
4.35

C (t)  
2.47

D (d)  
1.55

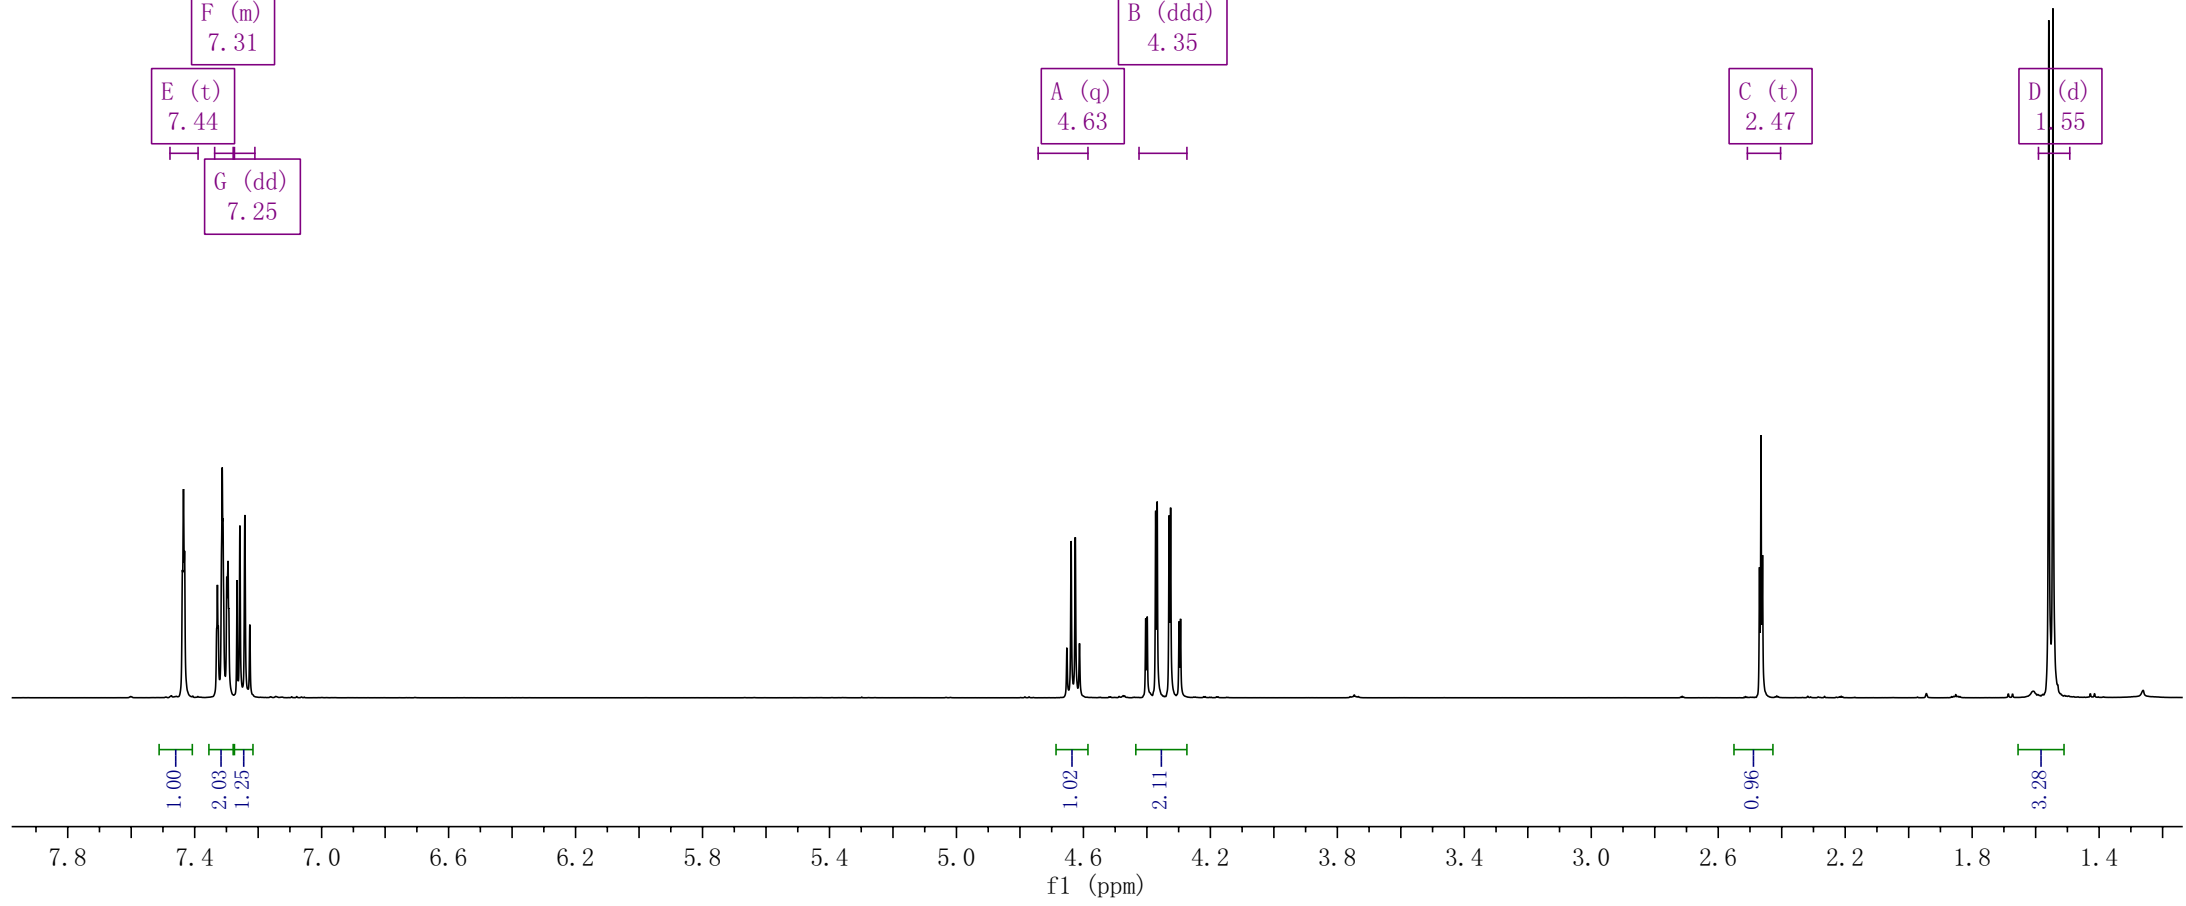

JKG-20150316-2B  
C13 NMR (CDCl3) {S: 2015-1} ZHL 39

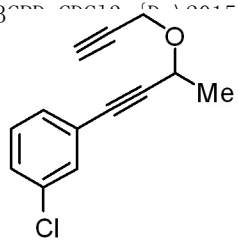

134.10  
131.61  
129.83  
129.49  
128.73  
124.16

89.21  
84.20  
79.40  
77.25  
77.00  
76.75  
74.56  
64.47  
55.83

21.87

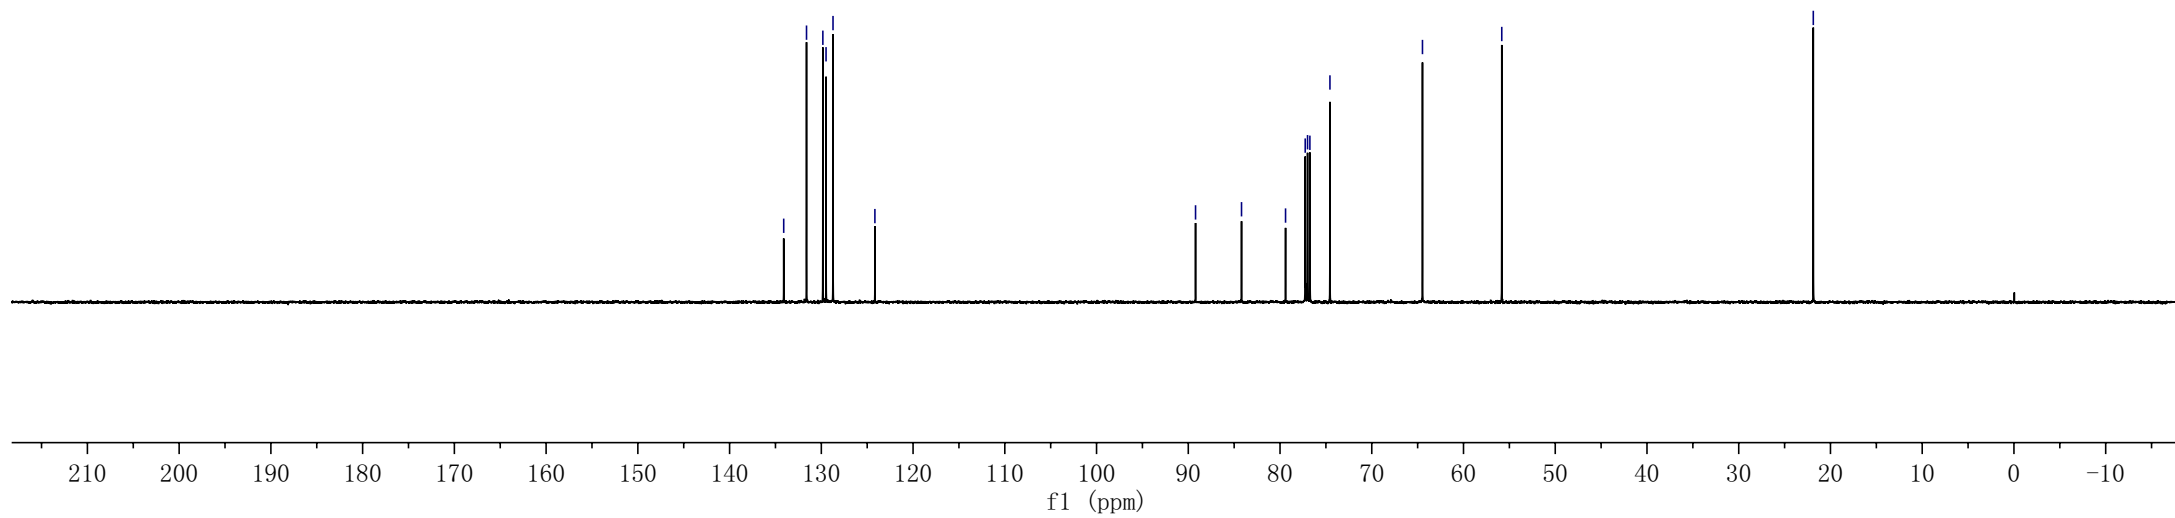

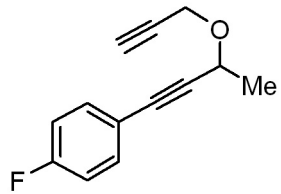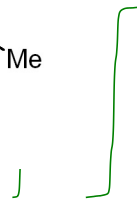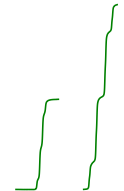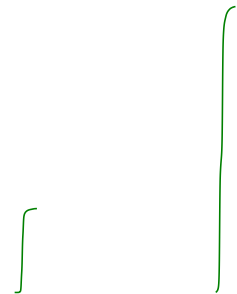

C (m)  
7.42

D (t)  
7.00

A (q)  
4.62

B (ddd)  
4.35

E (t)  
2.45

F (m)  
1.55

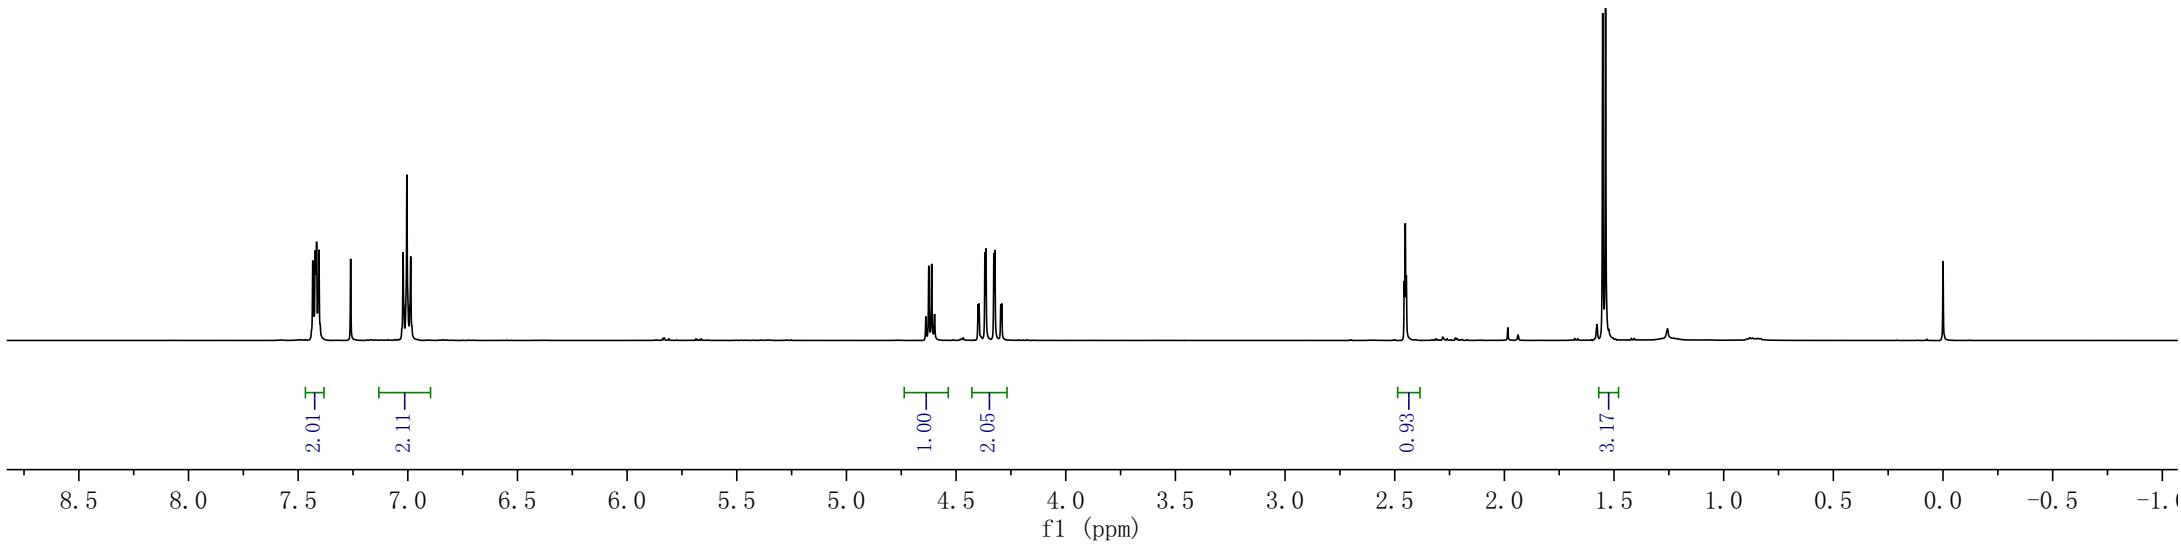



163.57  
161.58

133.69  
133.63

118.56  
118.54  
115.64  
115.47

87.64  
84.56  
79.51  
77.25  
77.00  
76.75  
74.46

64.57

55.78

21.97

A (d)  
162.58

B (d)  
133.66

C (d)  
118.55

D (d)  
115.55

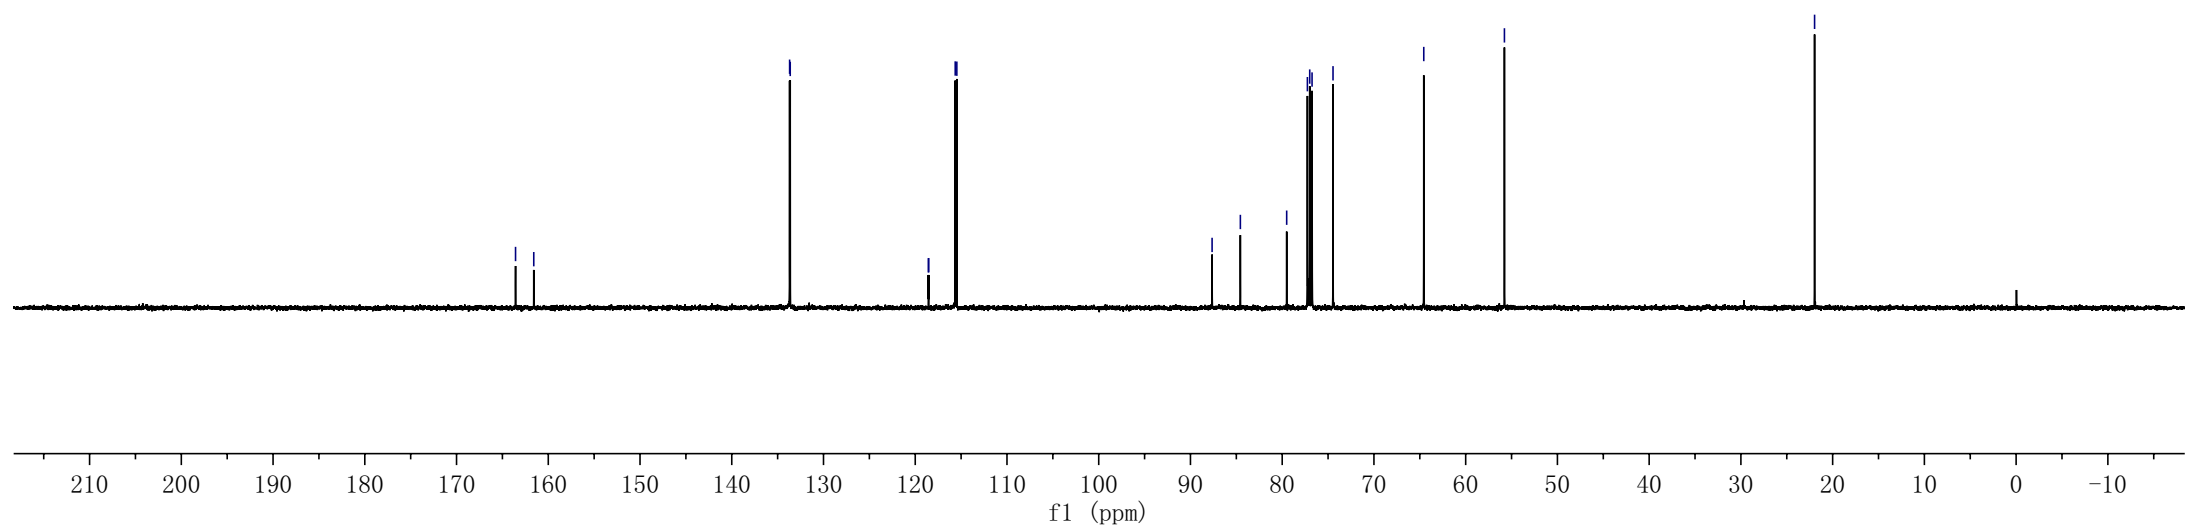



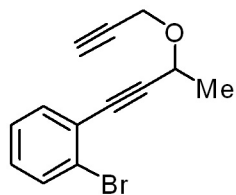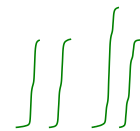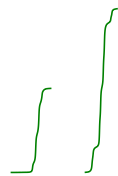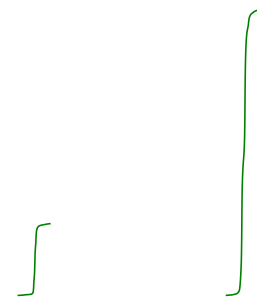

D (dt)  
7.46  
C (dd)  
7.59  
F (td)  
7.18  
E (m)  
7.26

B (m)  
4.43  
A (m)  
4.69

G (t)  
2.47

H (t)  
1.58

1.04  
1.05  
1.43  
1.04

1.00  
1.95

0.85

3.40

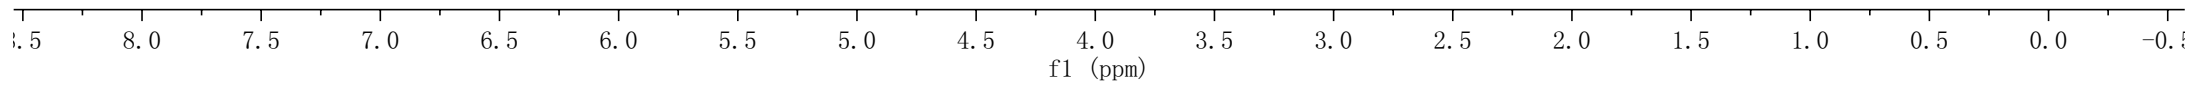

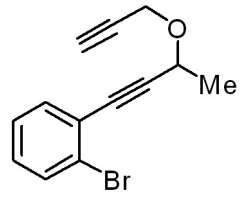

133.38  
132.36  
129.60  
126.95  
125.59  
124.60

92.64

84.16  
79.50  
77.25  
77.00  
76.75  
74.51

64.56

55.88

21.81

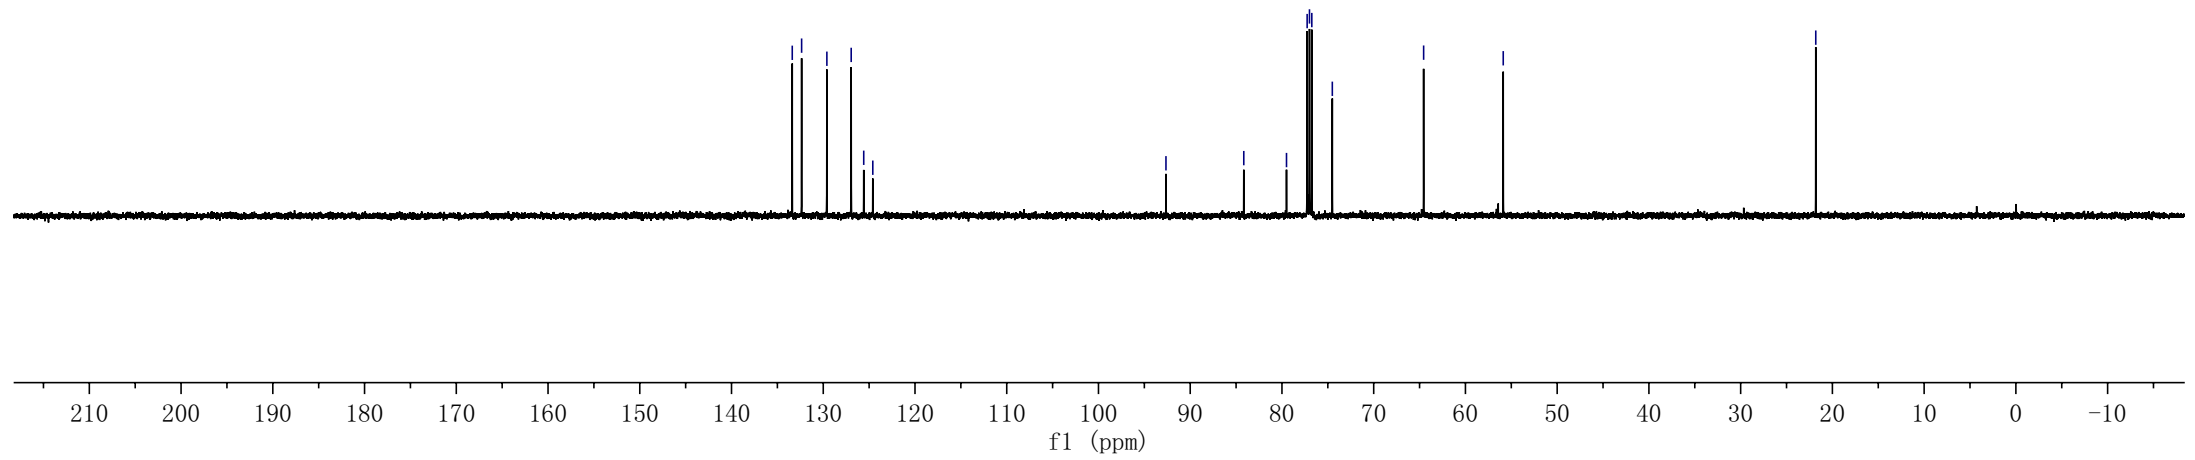

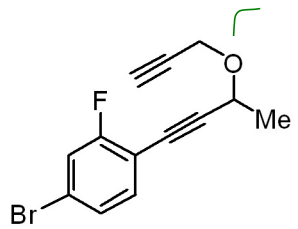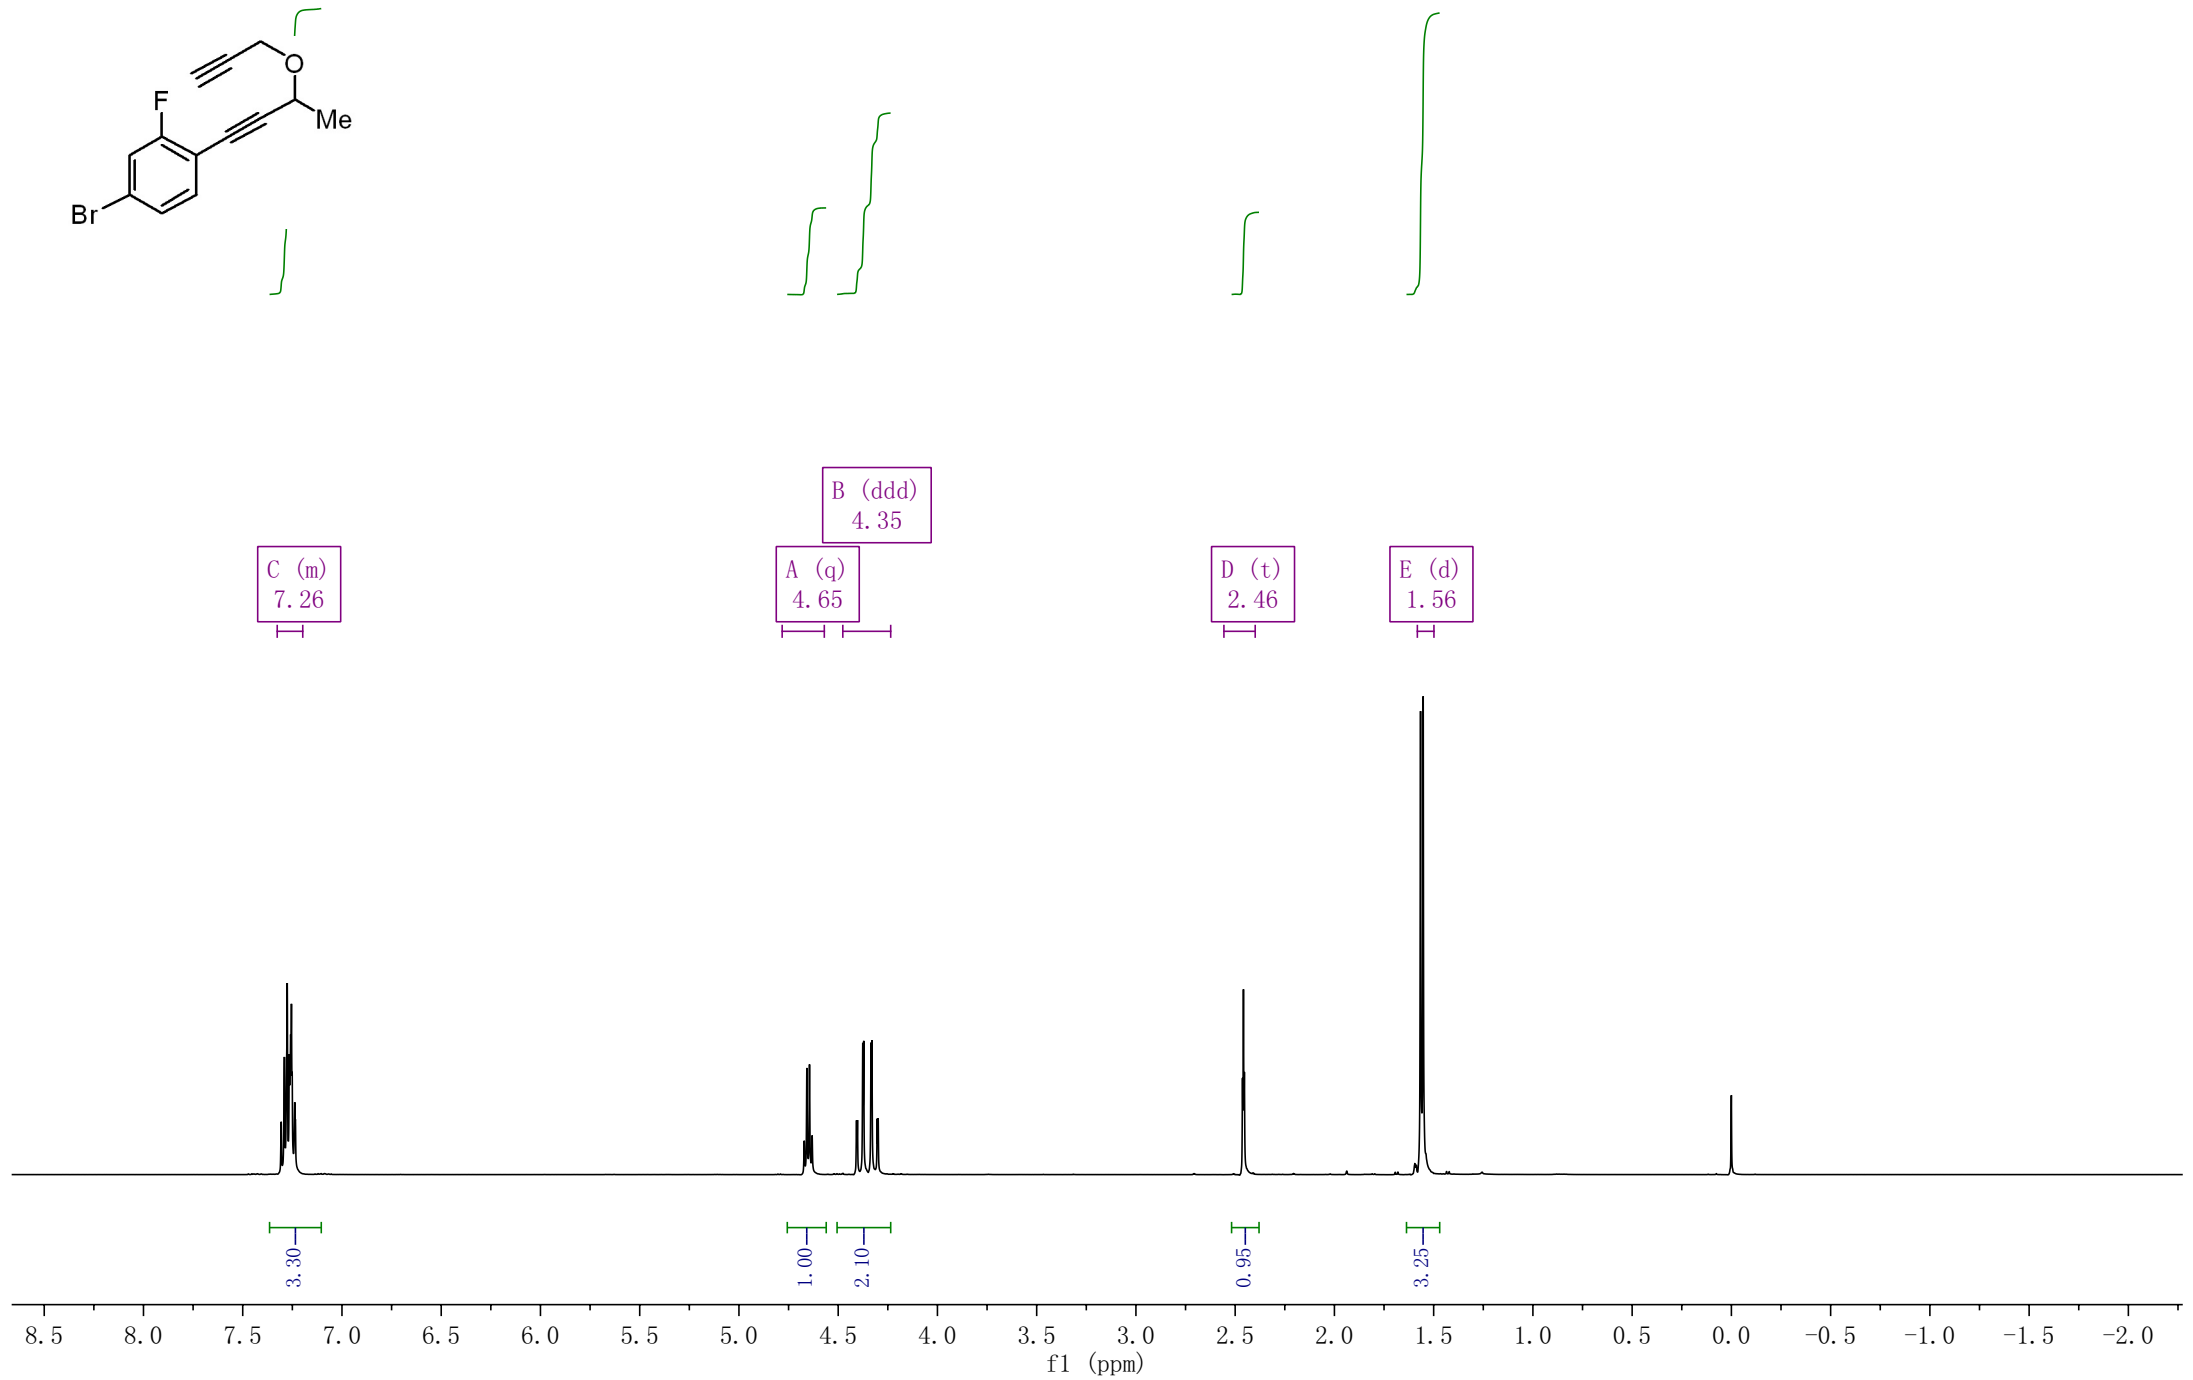

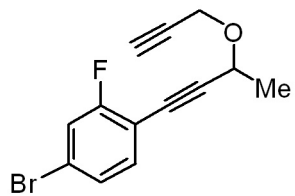

163.50  
161.46

134.24  
134.22  
127.39  
127.36  
122.85  
122.78  
119.39  
119.20

110.36  
110.24

94.44  
94.41

79.36  
78.09  
77.25  
77.00  
76.75  
74.59

64.56

55.86

21.75

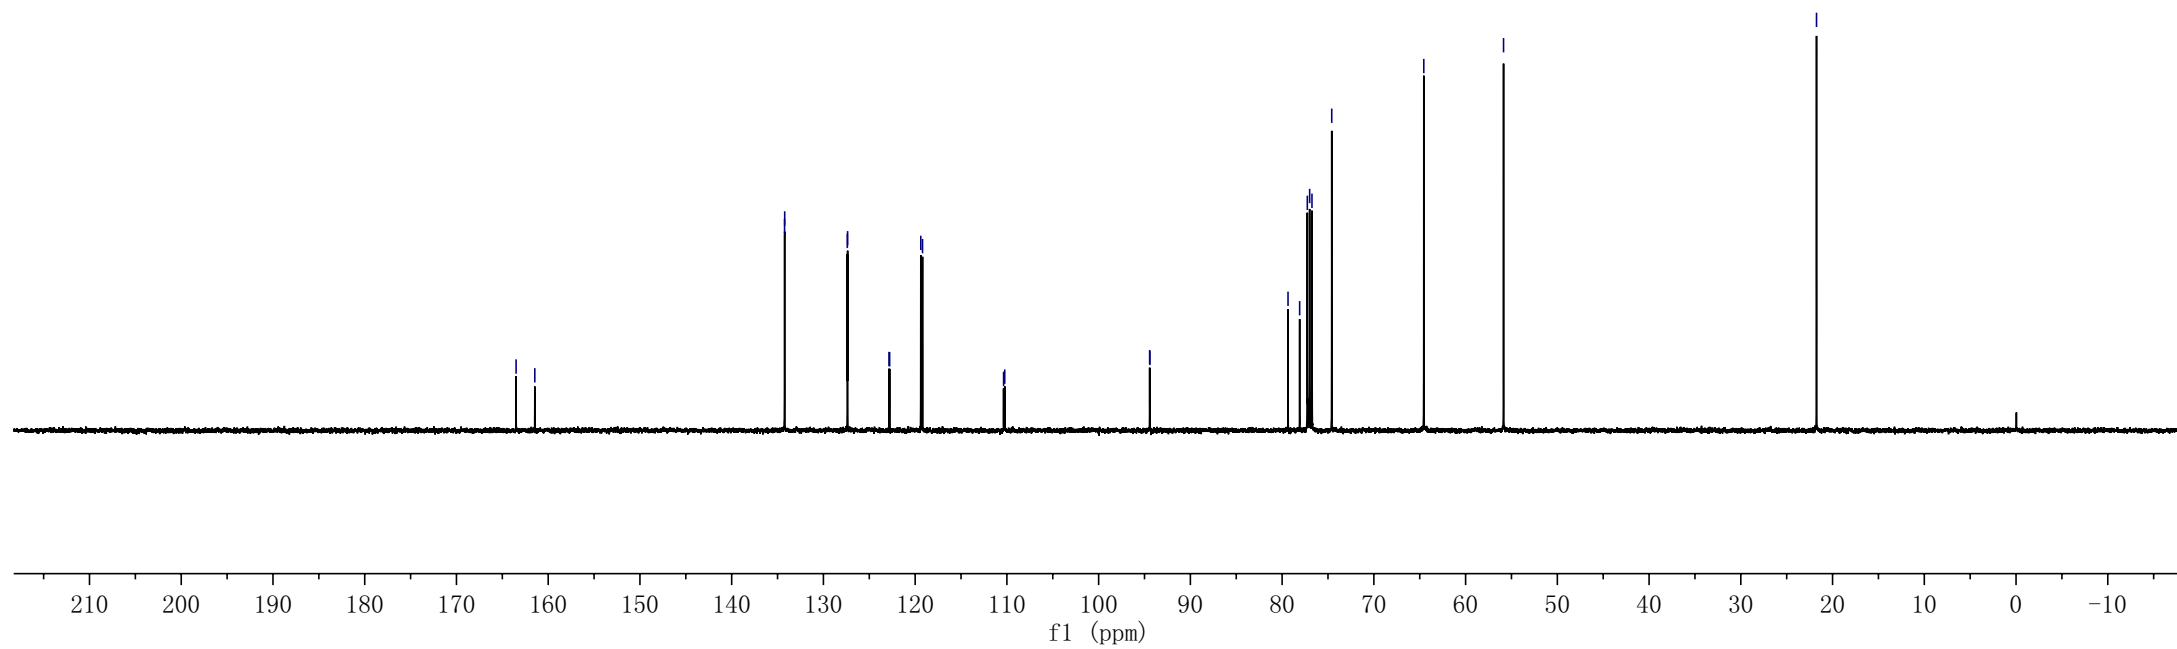

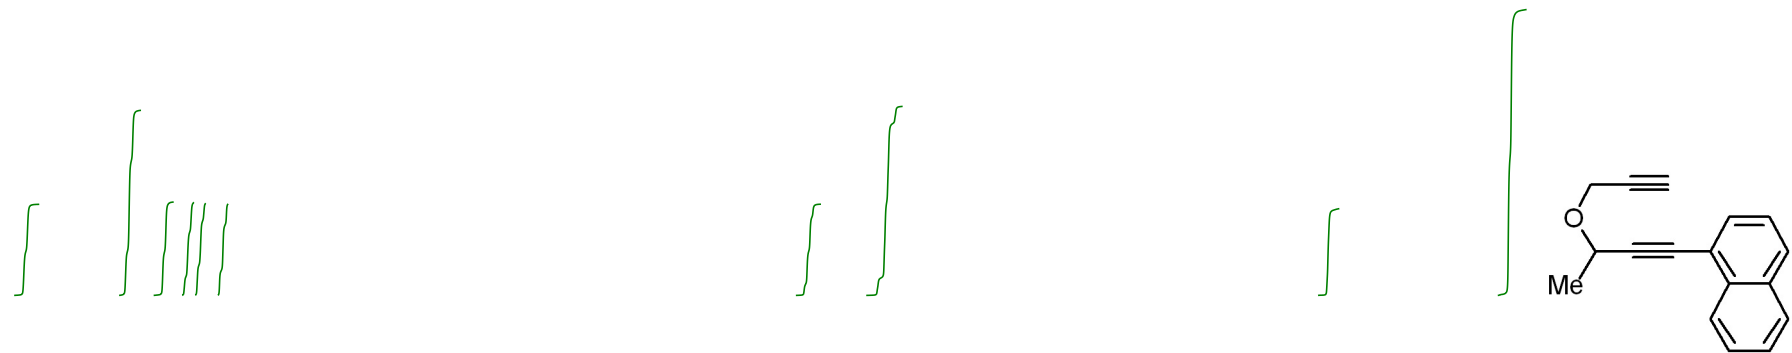

A (d)  
8.31

B (t)  
7.85

C (d)  
7.69

D (t)  
7.58

E (m)  
7.53

F (dd)  
7.43

G (q)  
4.81

H (m)  
4.46

I (t)  
2.49

J (d)  
1.67

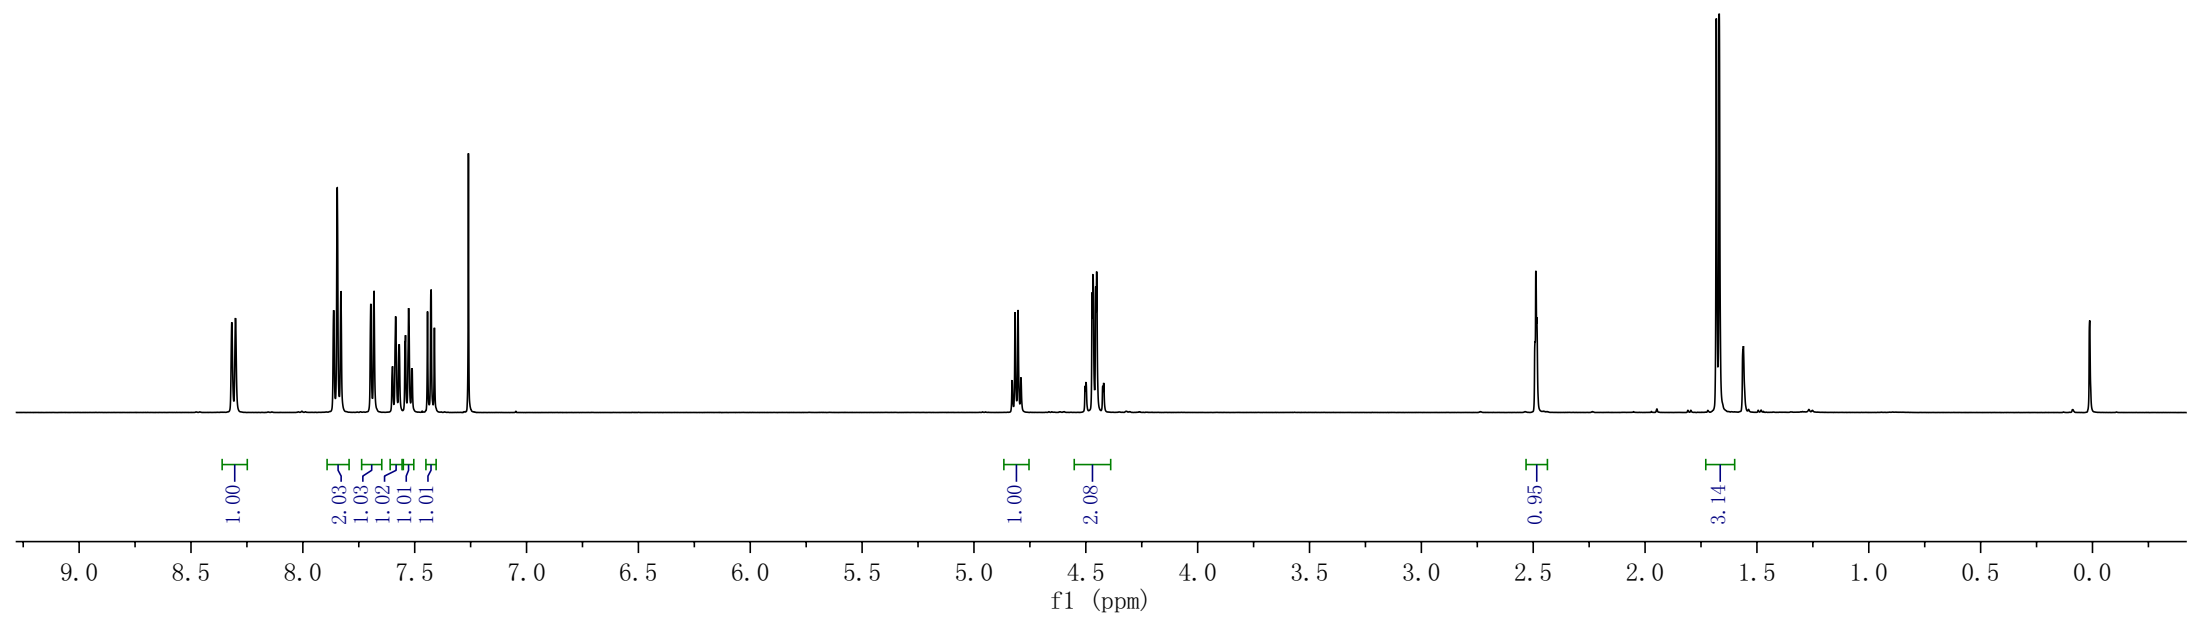

133.29  
133.13  
130.69  
128.96  
128.29  
126.84  
126.41  
125.99  
125.13  
120.11

92.90

83.75  
79.61  
77.25  
77.00  
76.75  
74.53

64.87

55.91

22.23

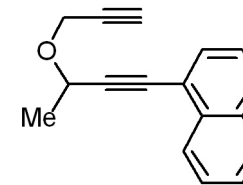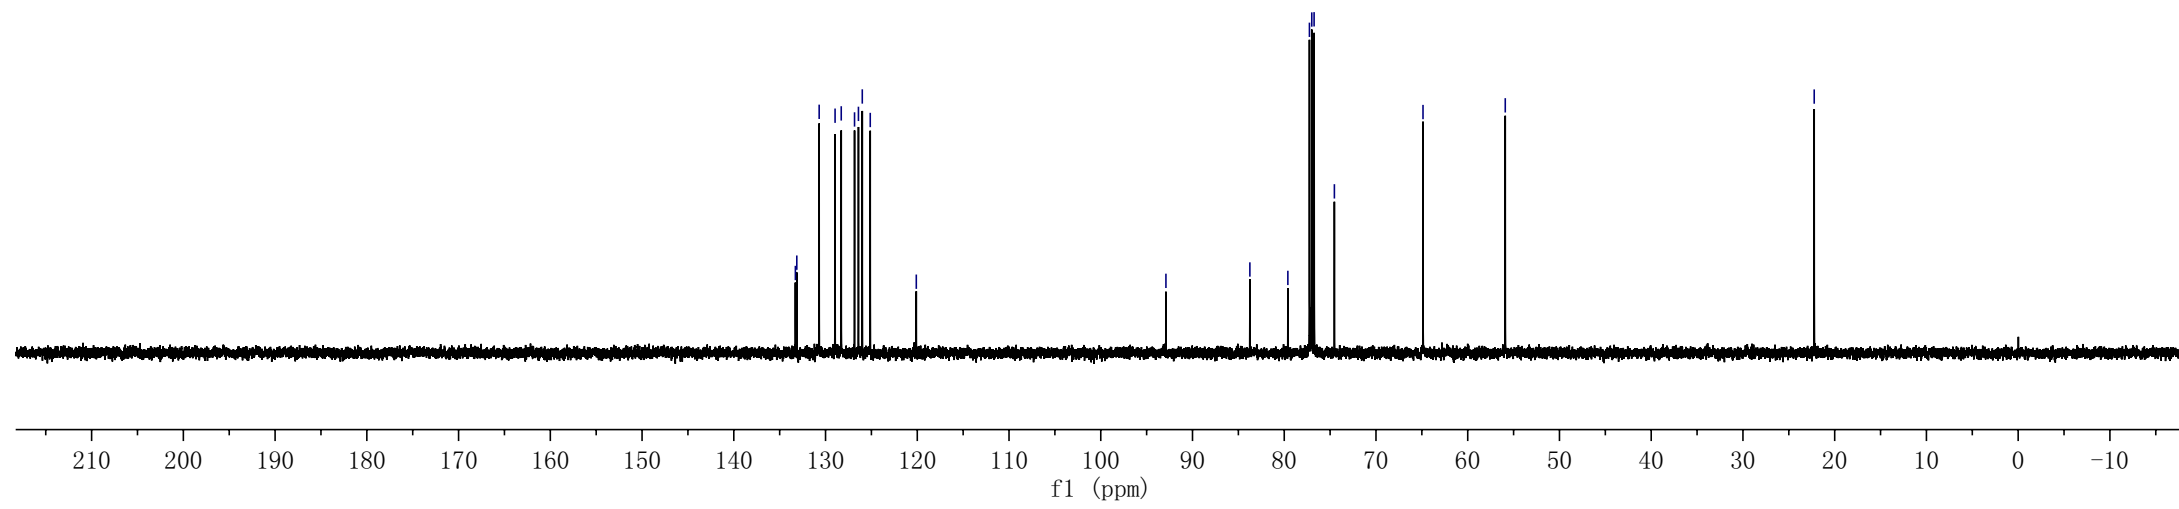

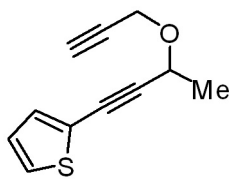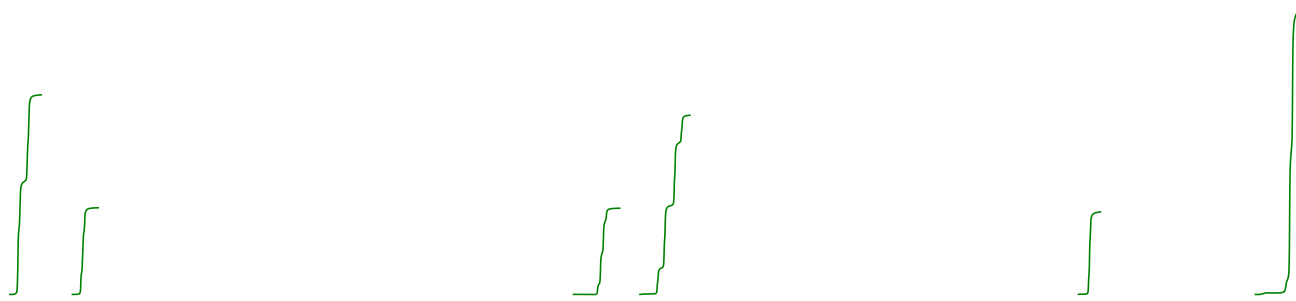

D (dd)  
6.97

C (m)  
7.25

B (ddd)  
4.33

A (q)  
4.64

E (t)  
2.45

F (t)  
1.55

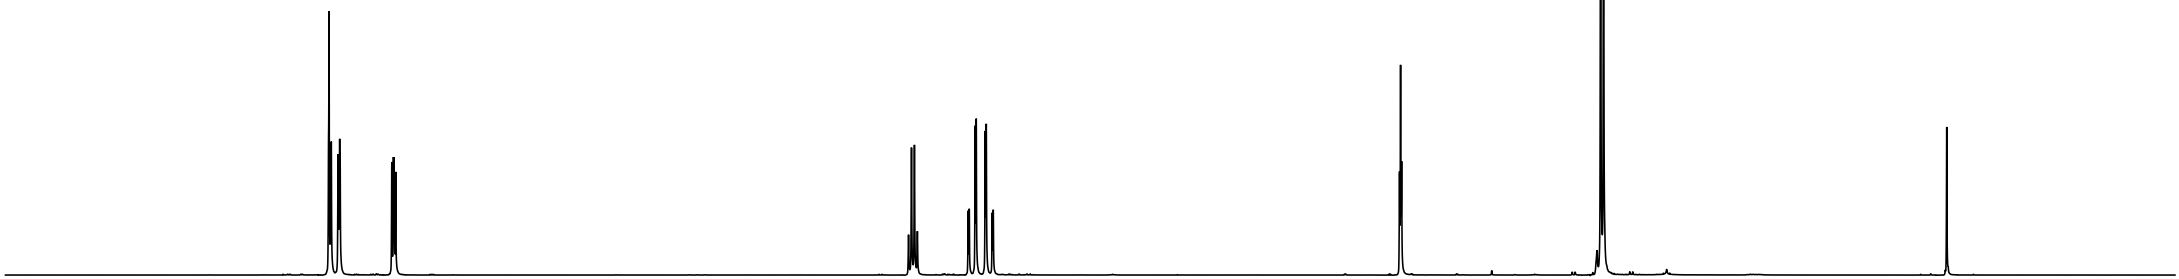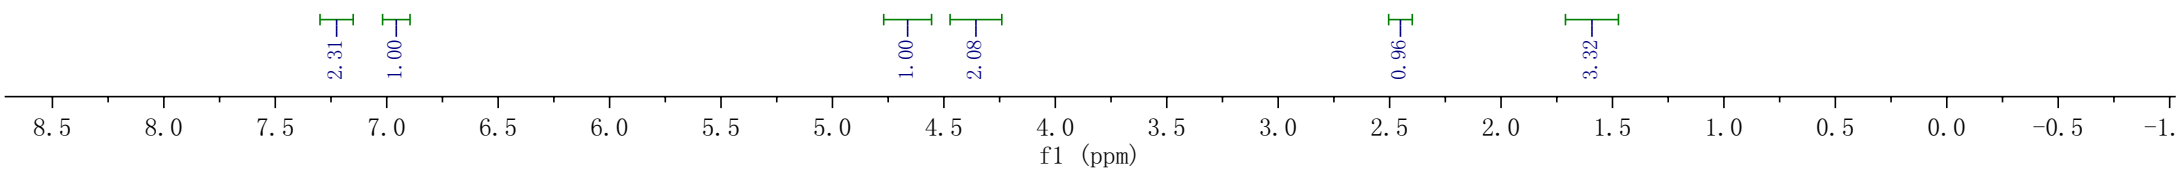

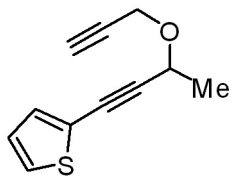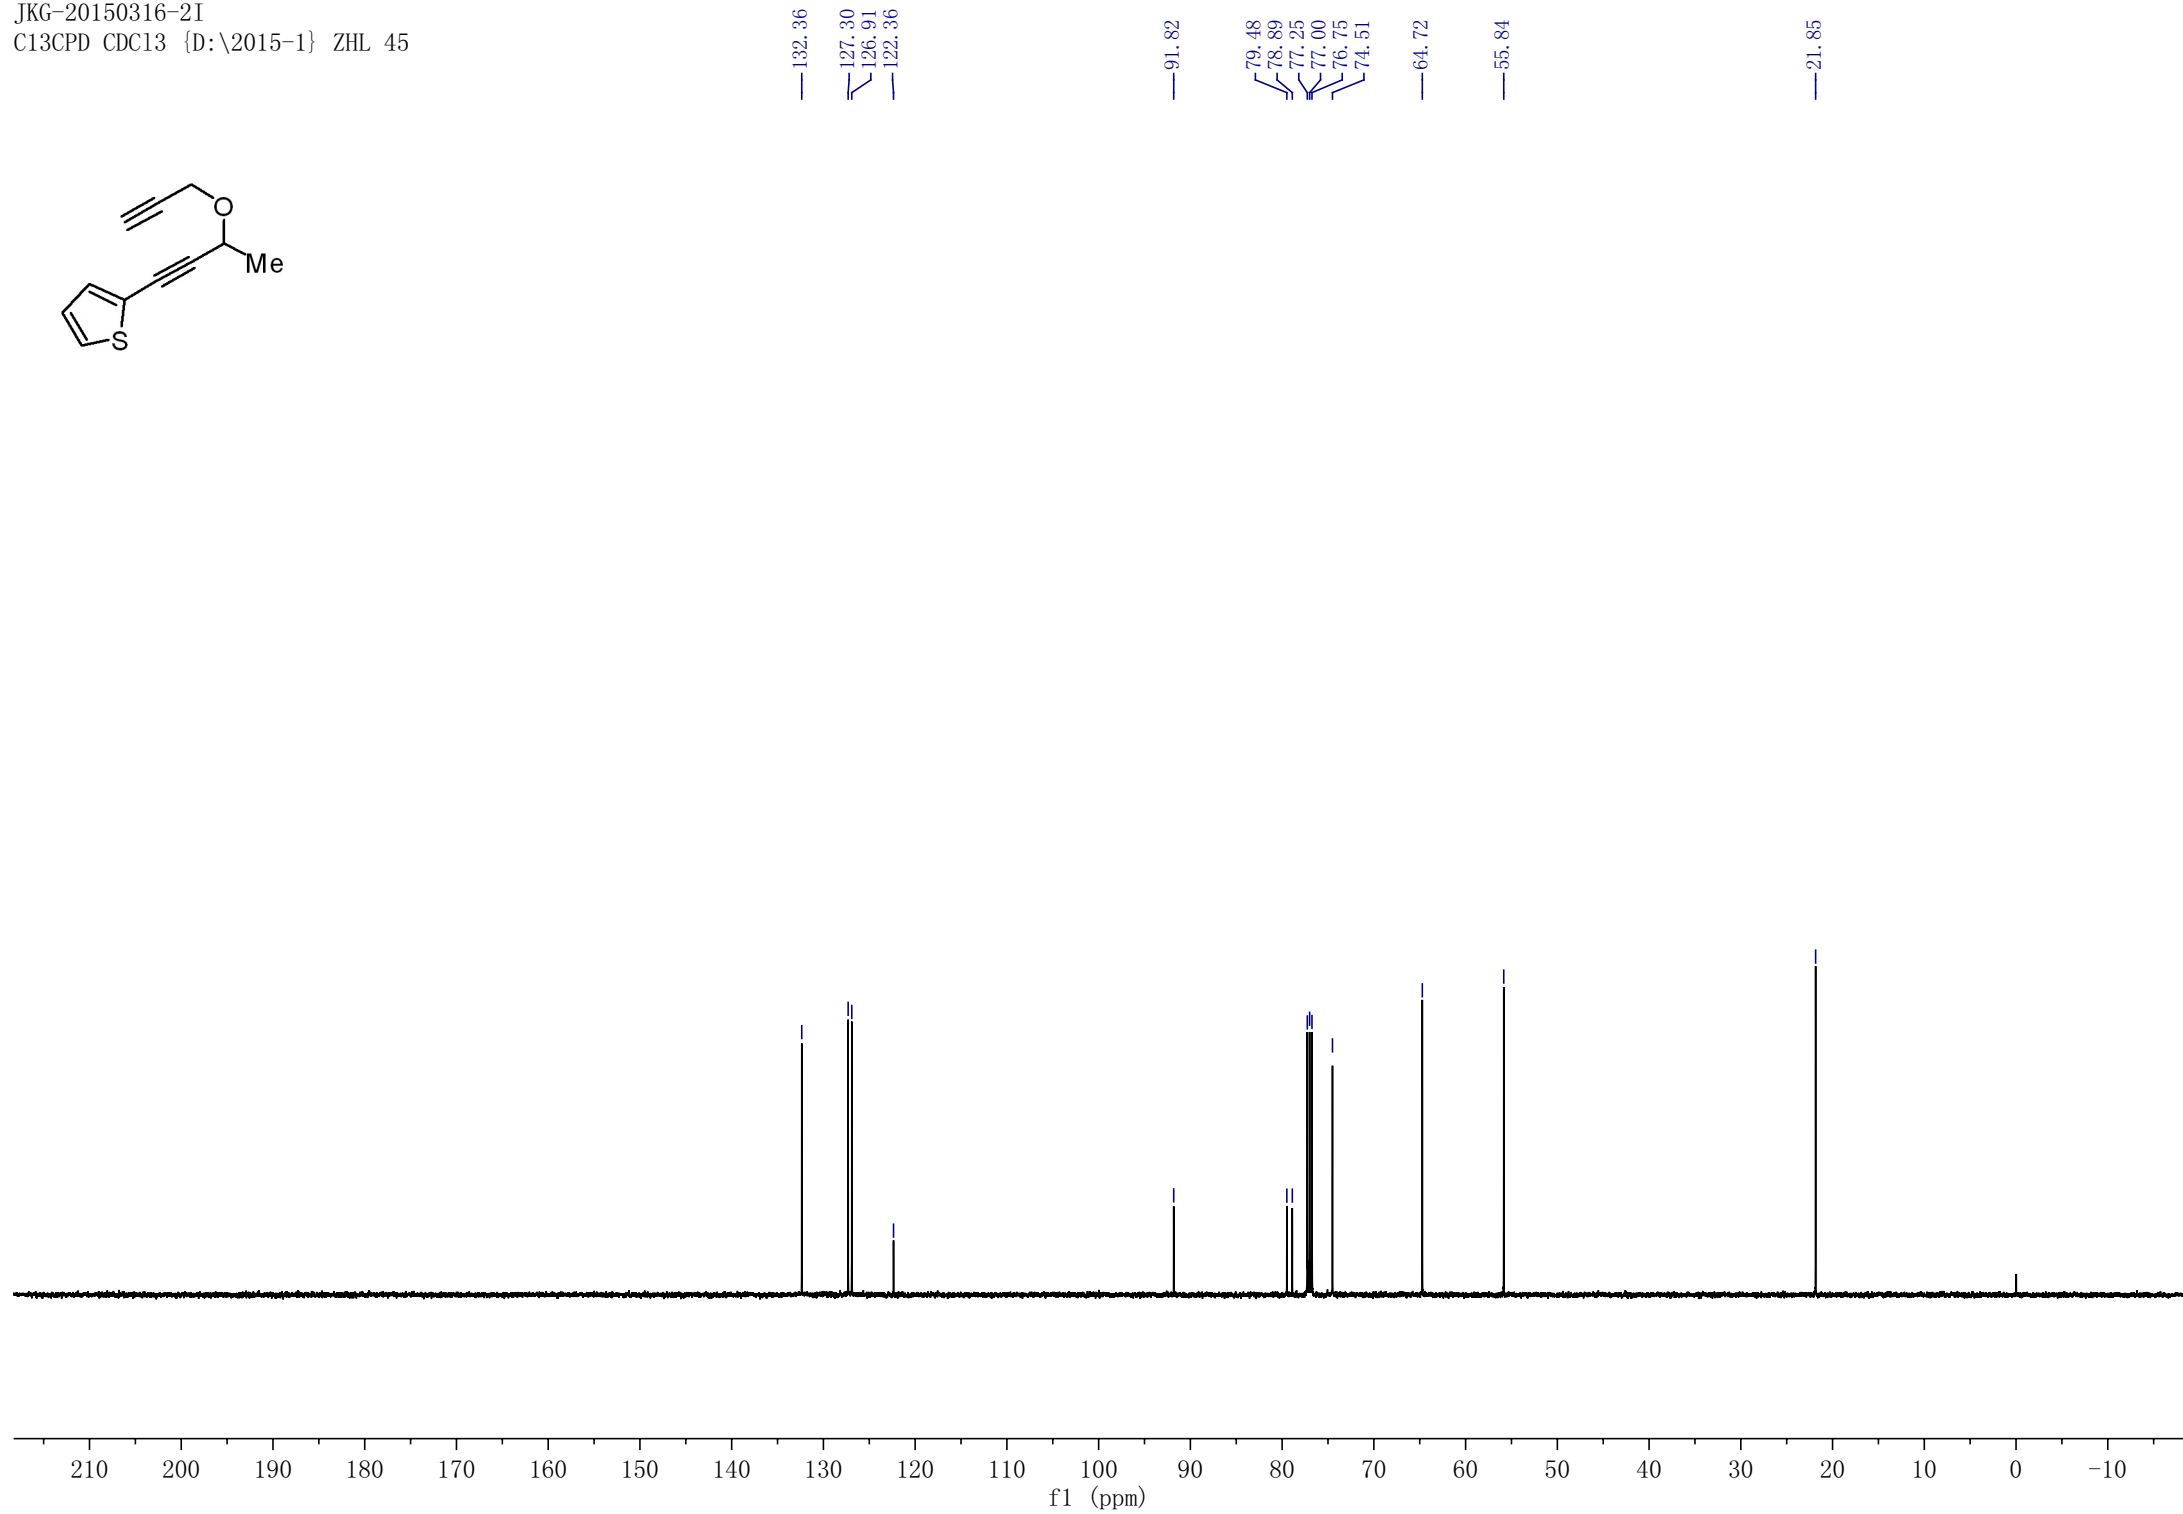



JKG-20150316-1-1S

PROTON NMR (CDCl<sub>3</sub>) {ZL 2015-1} ZHL 13

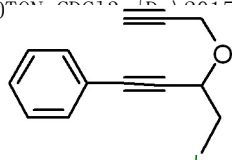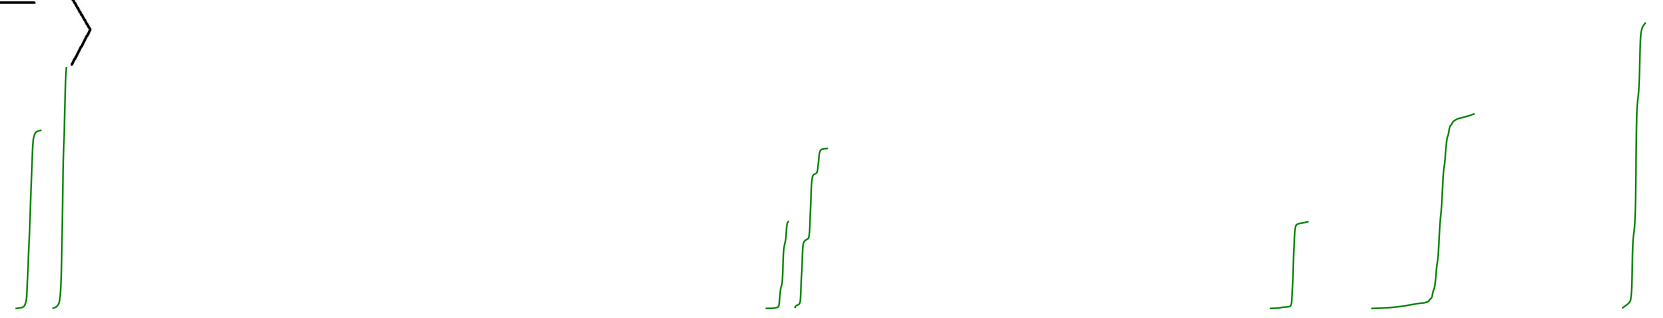

D (m)  
7.21

C (m)  
7.35

B (qd)  
4.27

A (dd)  
4.36

E (t)  
2.35

F (m)  
1.76

G (t)  
0.99

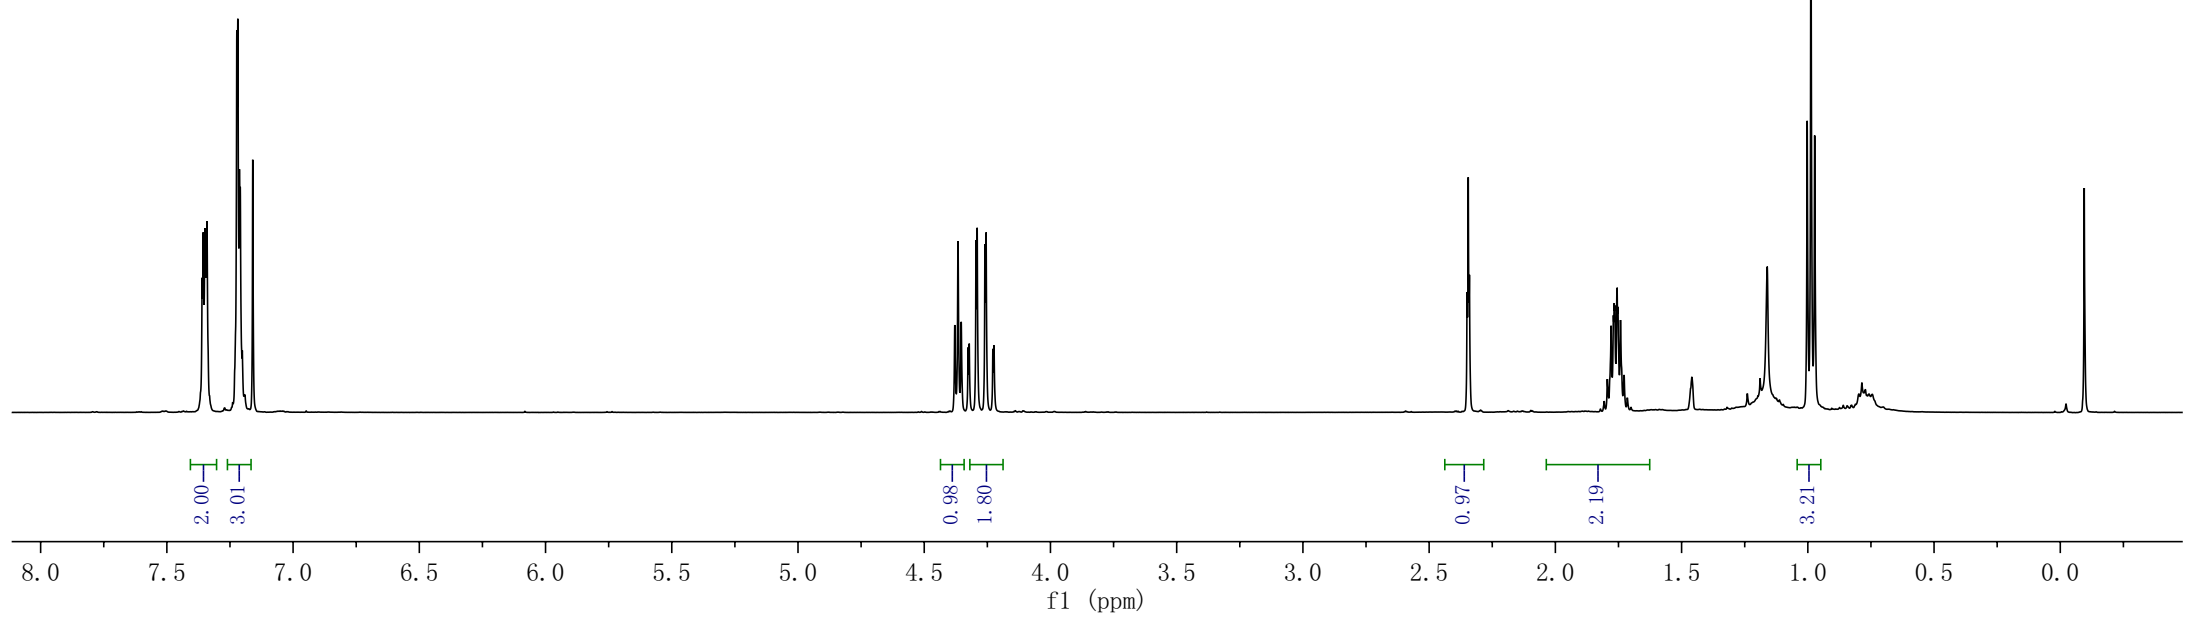

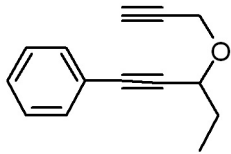

131.77  
128.40  
128.26  
122.59

87.06  
86.37  
79.69  
77.25  
77.00  
76.75  
74.33  
70.14

55.83

28.80

9.67

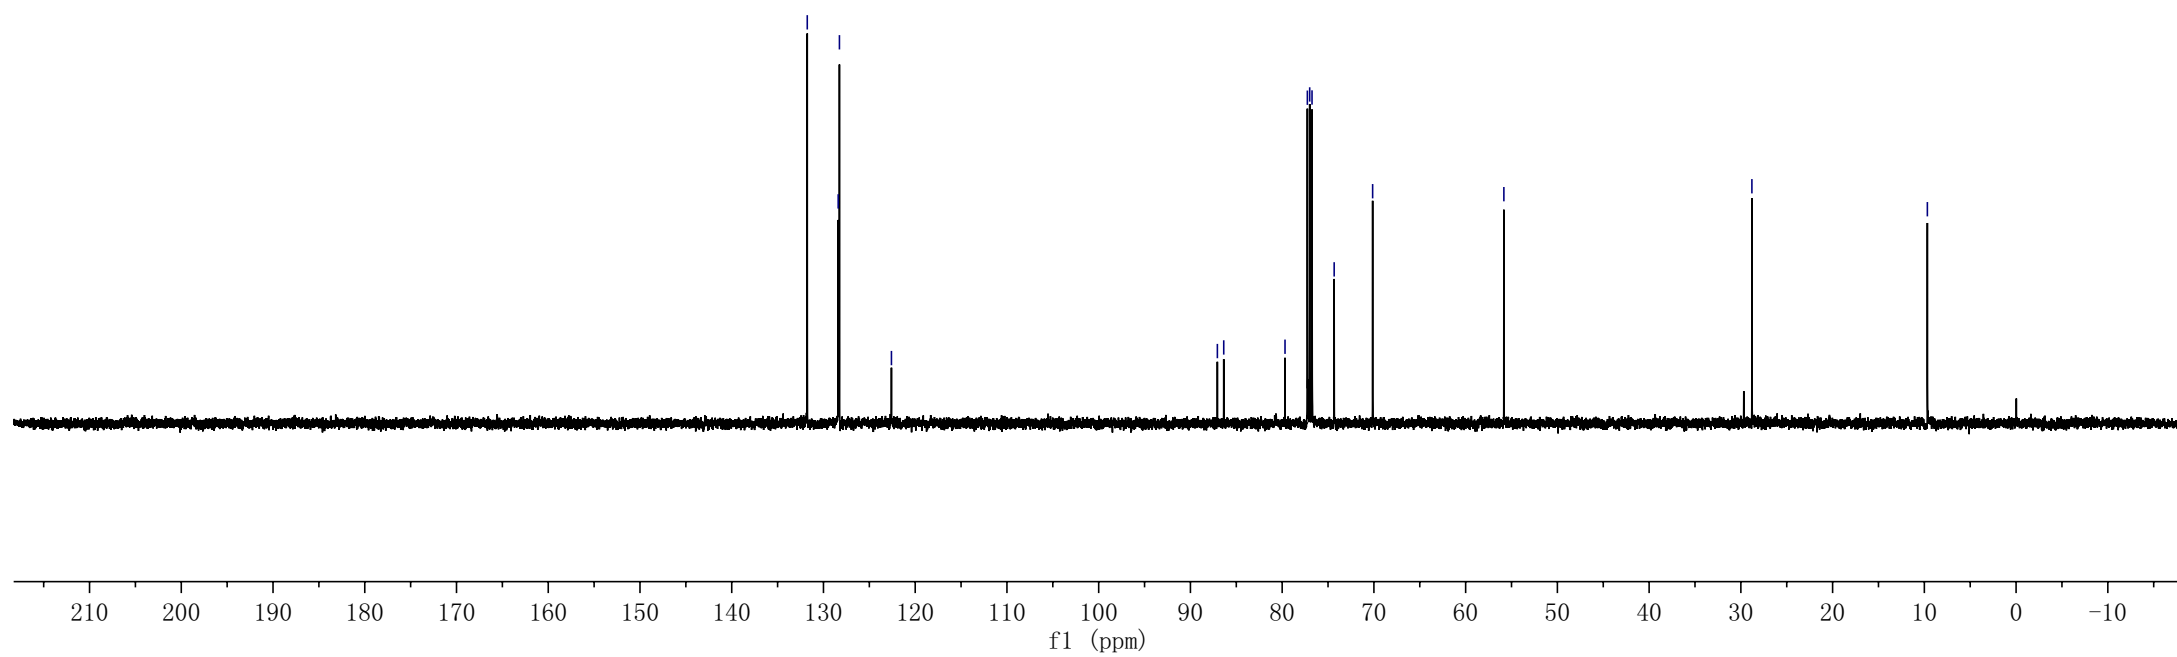

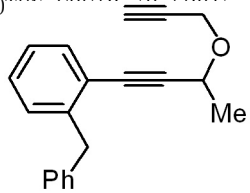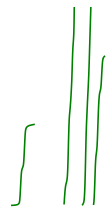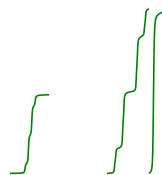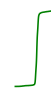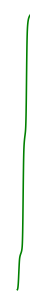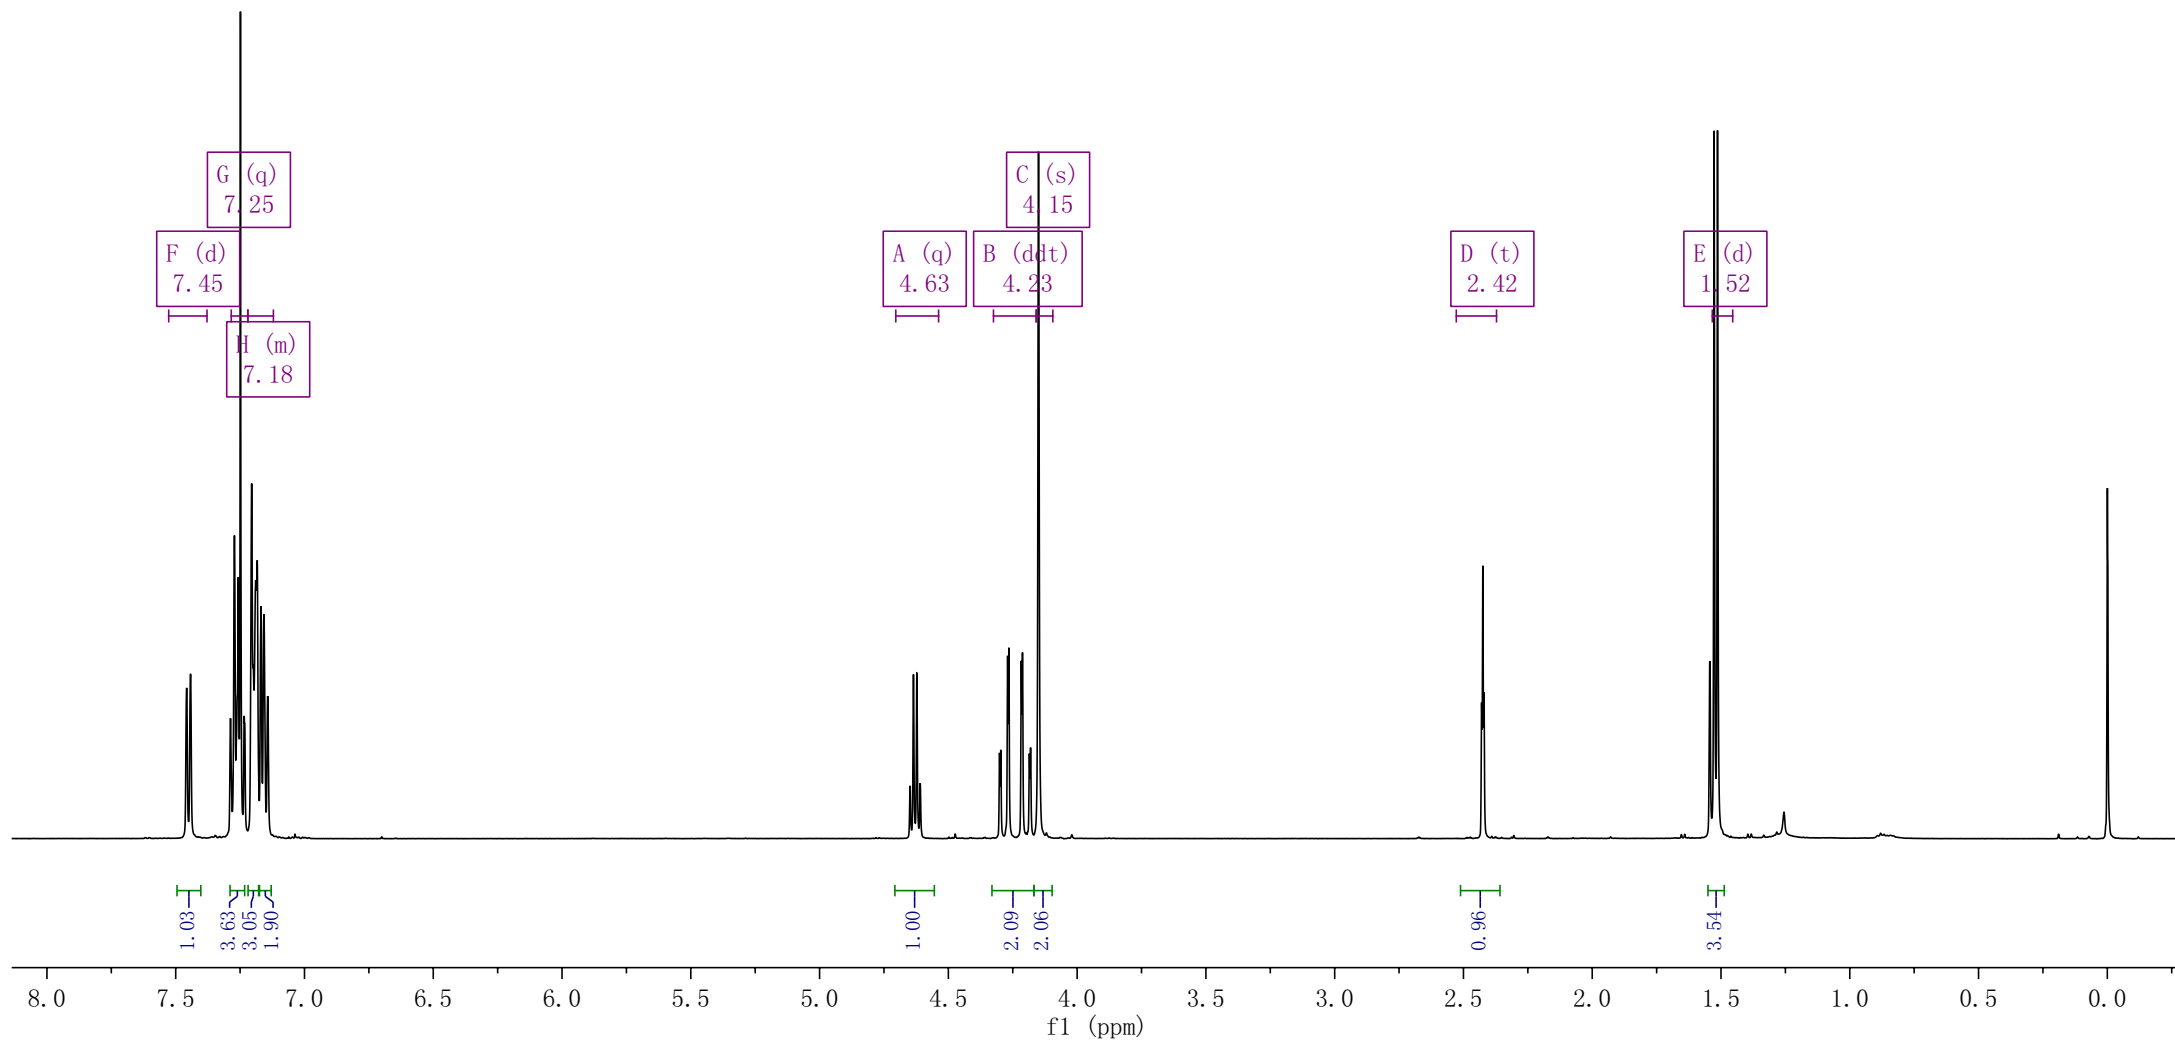

JKG-20150320-LX-I-2b  
C13 NMR (CDCl<sub>3</sub>) {5, 10015 1} ZHL 32

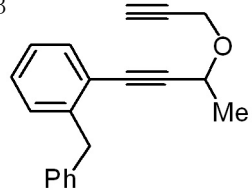

143.01  
140.37  
132.57  
129.49  
128.85  
128.73  
128.38  
126.13  
126.06  
122.23

91.99

84.52  
79.58  
77.25  
77.00  
76.75  
74.41

64.66

55.71

40.23

22.04

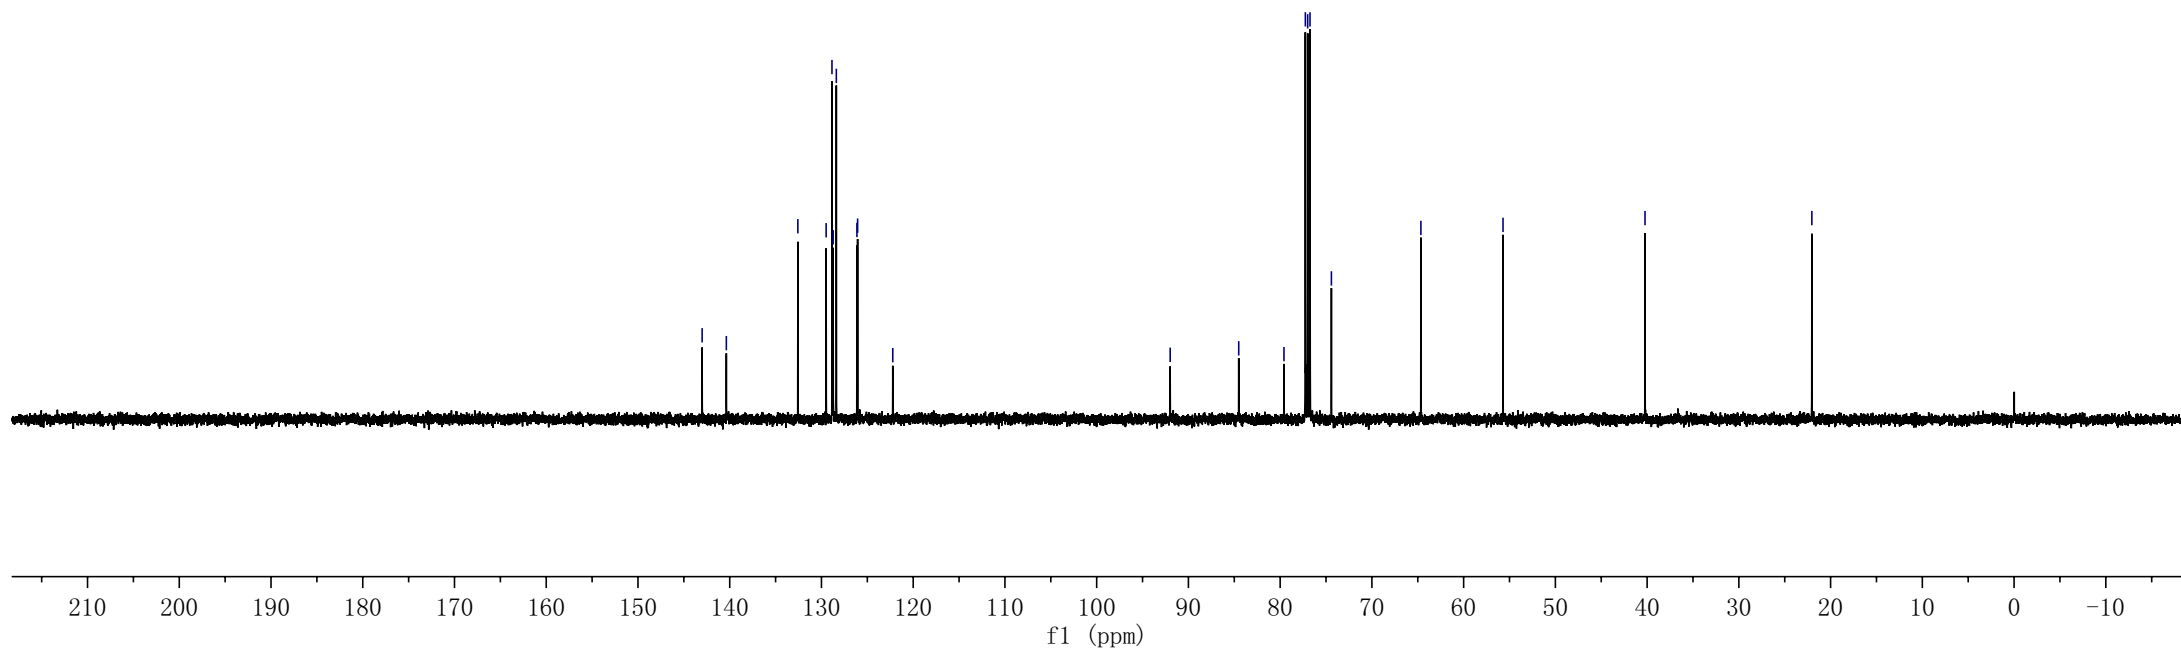

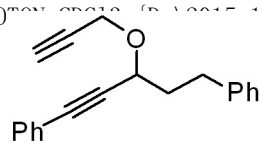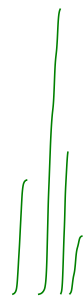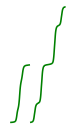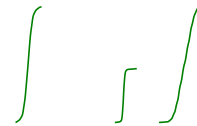

G (m)  
7.28

F (m)  
7.46

B (ddd)  
4.39

A (t)  
4.52

E (m)  
2.17

C (m)  
2.89

D (d)  
2.45

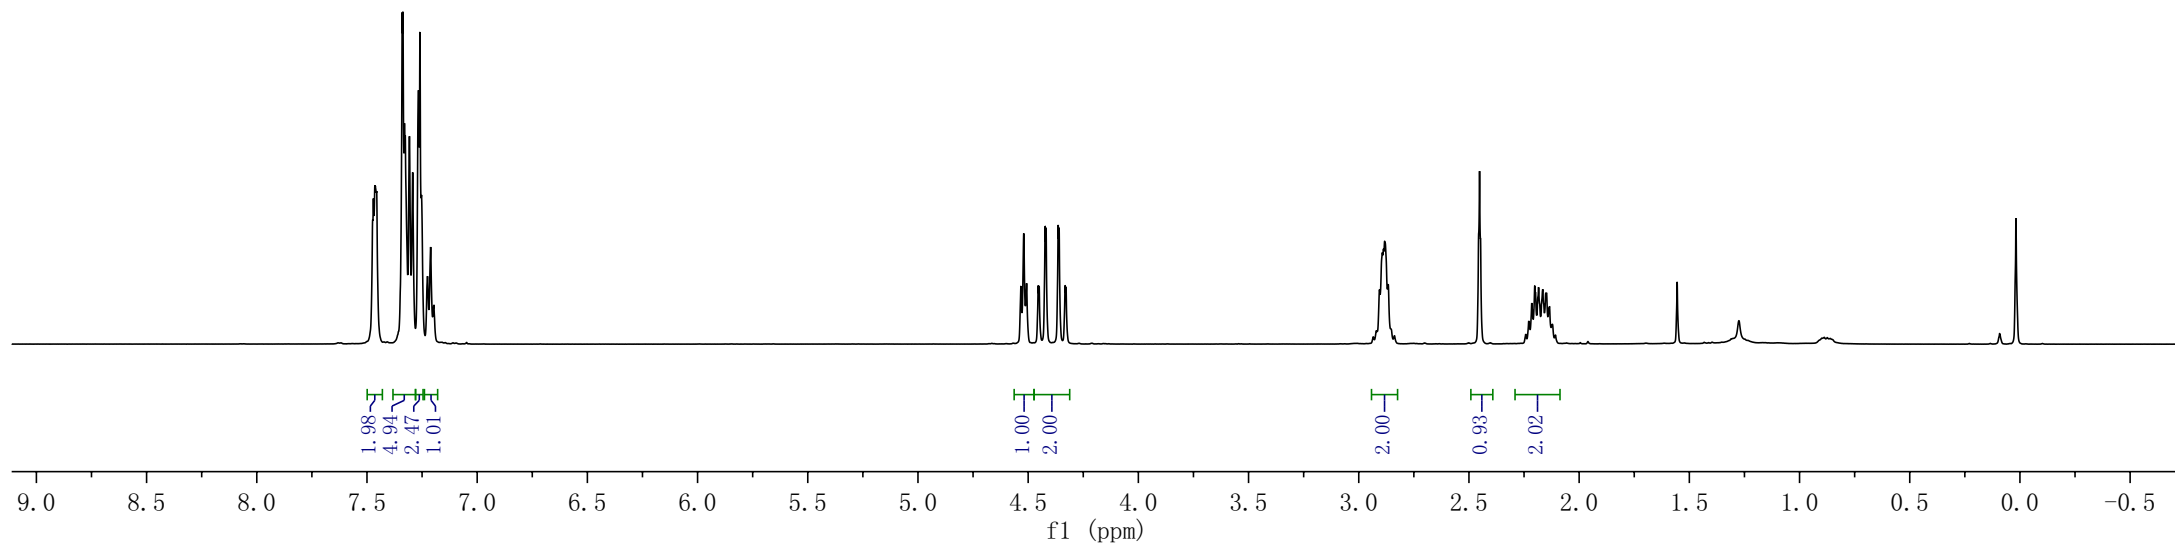

JKG-20150316-1-67C  
C13 NMR (CDCl<sub>3</sub>) { 2015-1 } ZHL 15

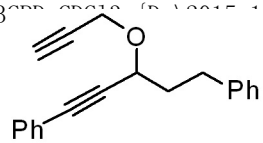

141.33  
131.78  
128.57  
128.49  
128.38  
128.29  
125.94  
122.47

86.93  
86.68  
79.60  
77.25  
77.00  
76.75  
74.49  
68.11

55.89

37.21

31.43

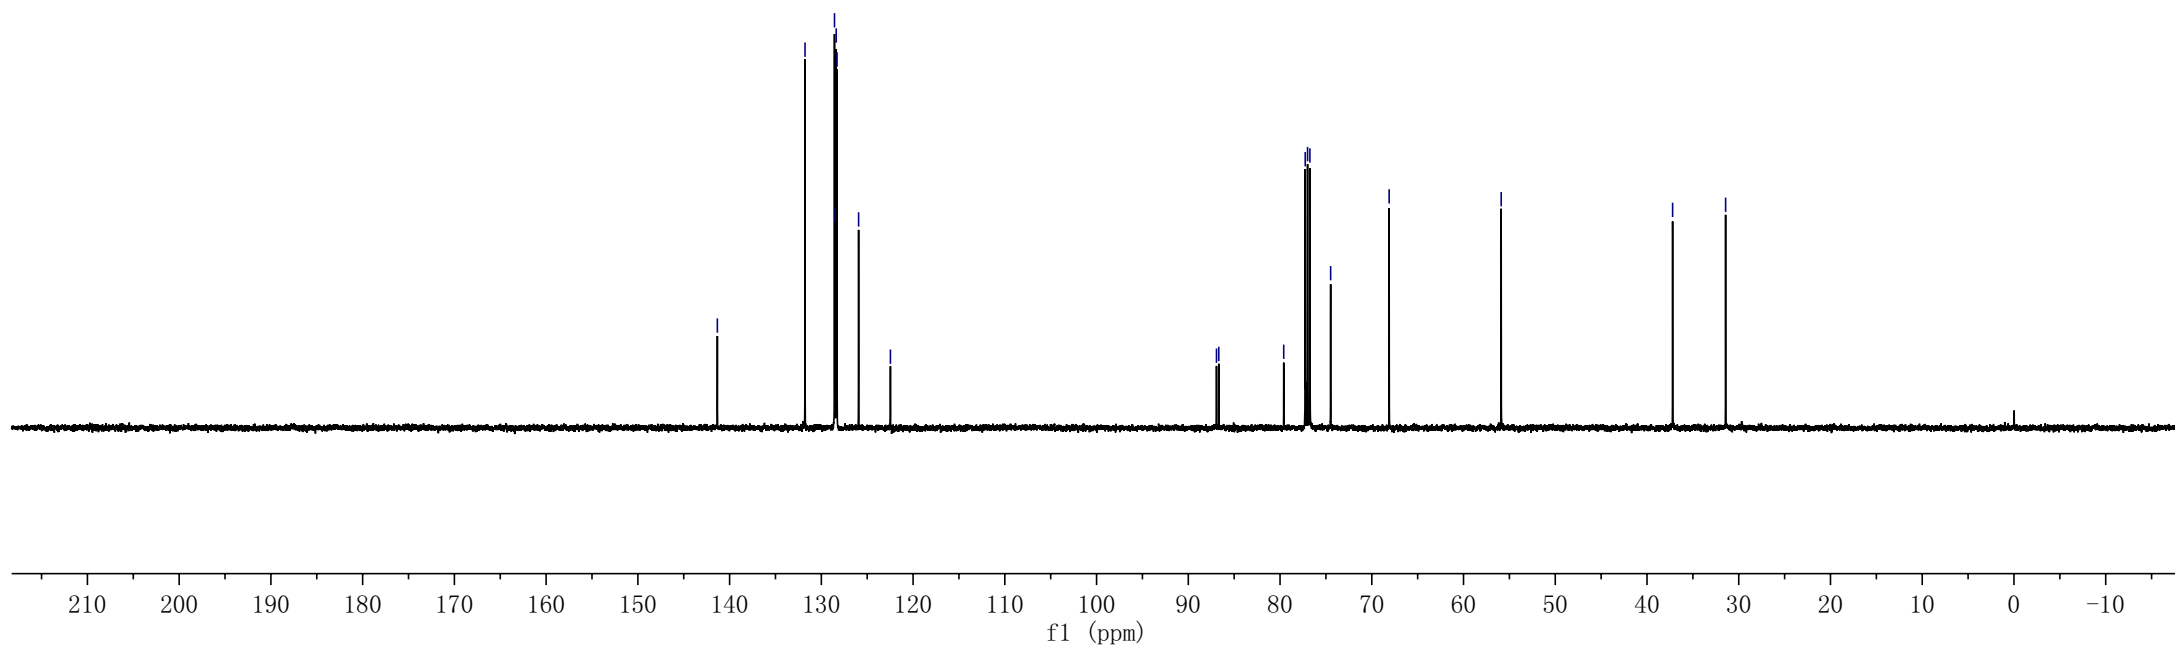

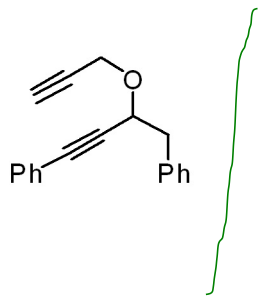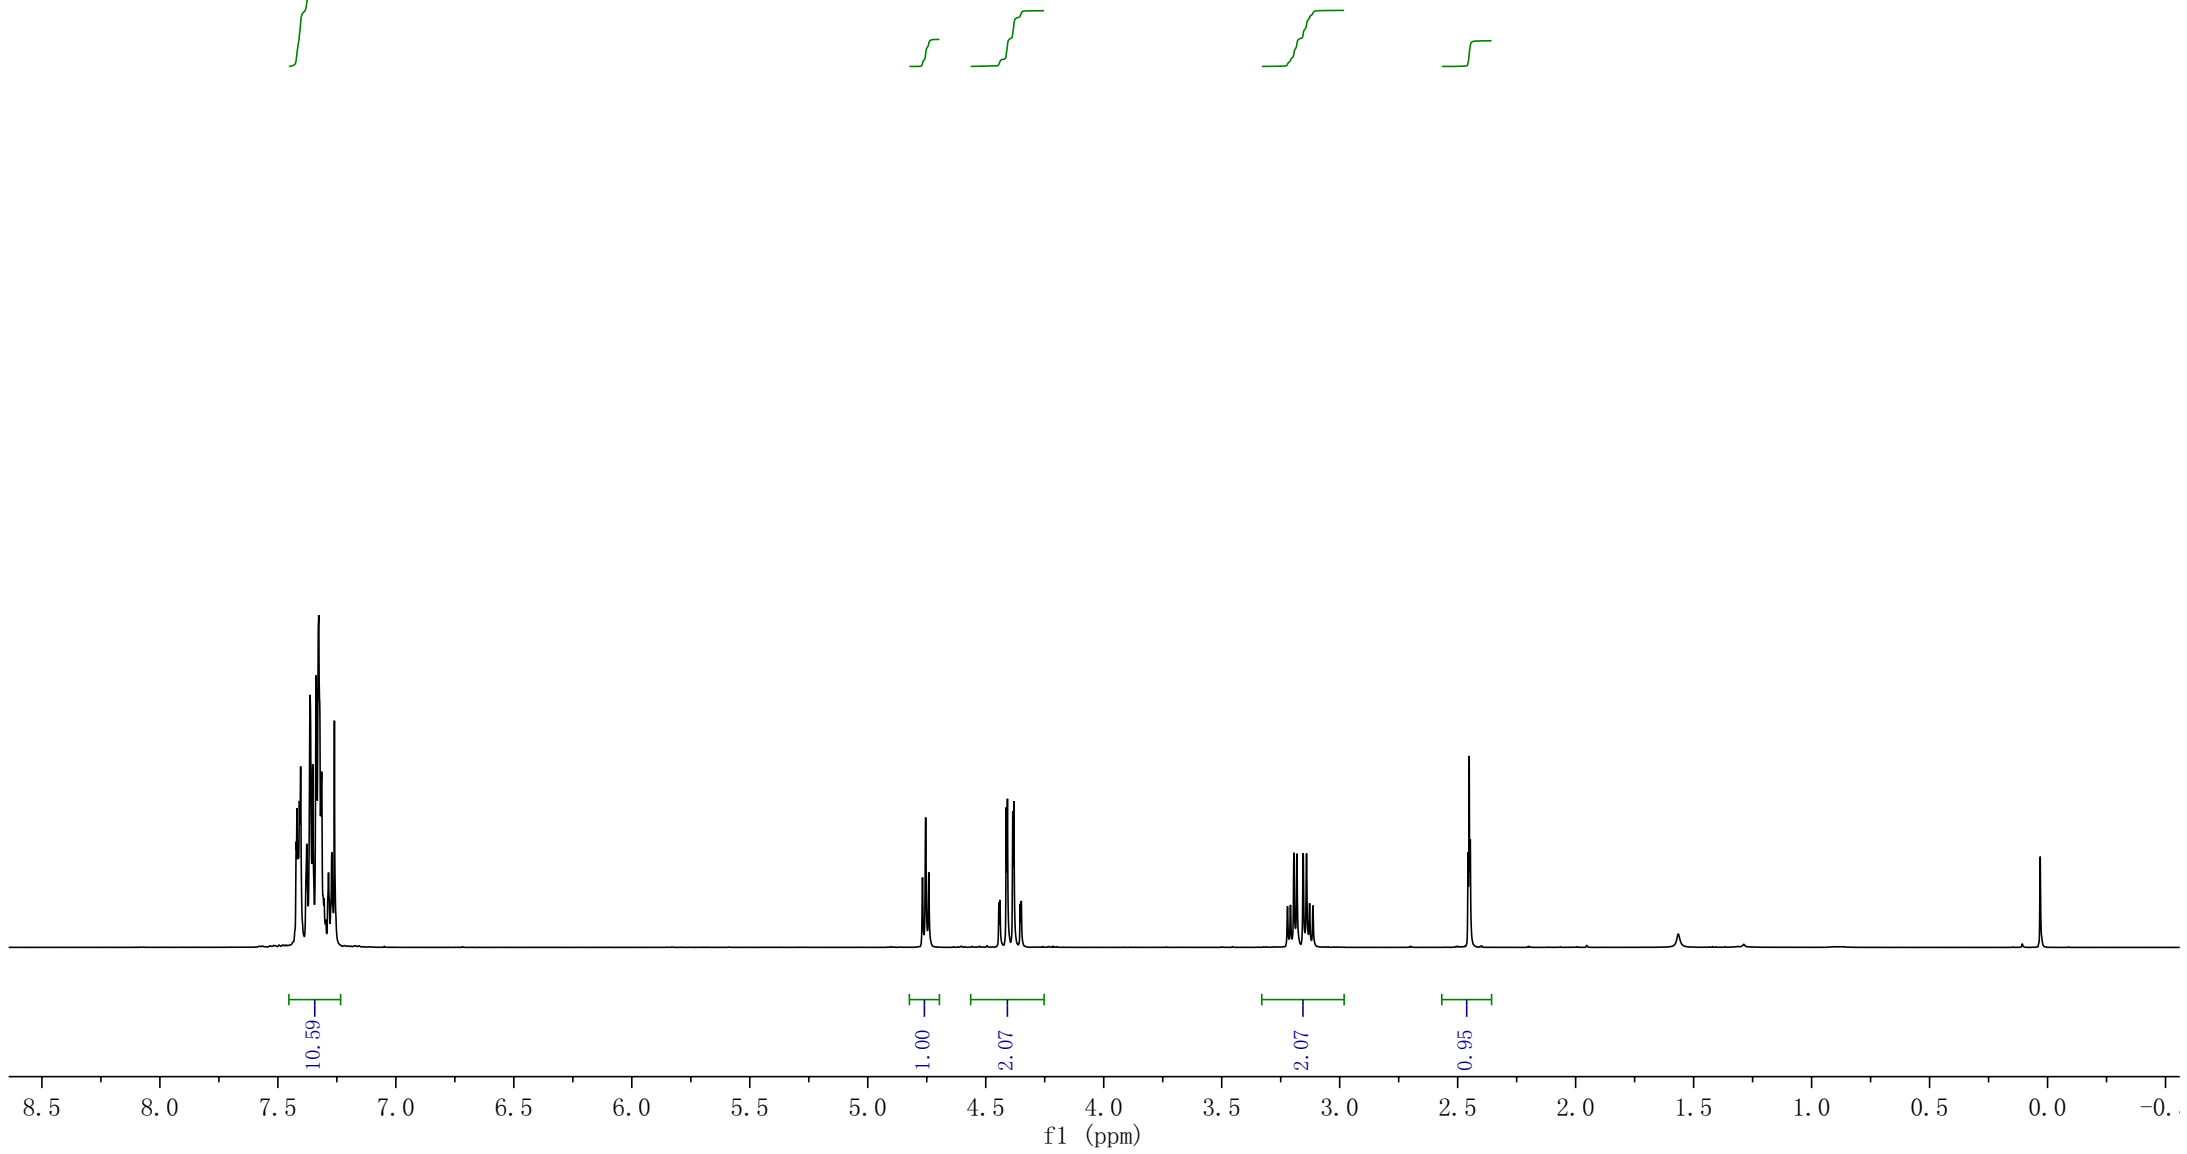

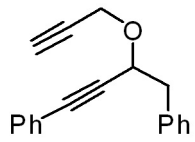

136.85  
131.68  
129.74  
128.46  
128.24  
128.15  
126.66  
122.41

87.32  
86.62  
79.41  
77.25  
77.00  
76.75  
74.58  
69.74

55.91

42.01

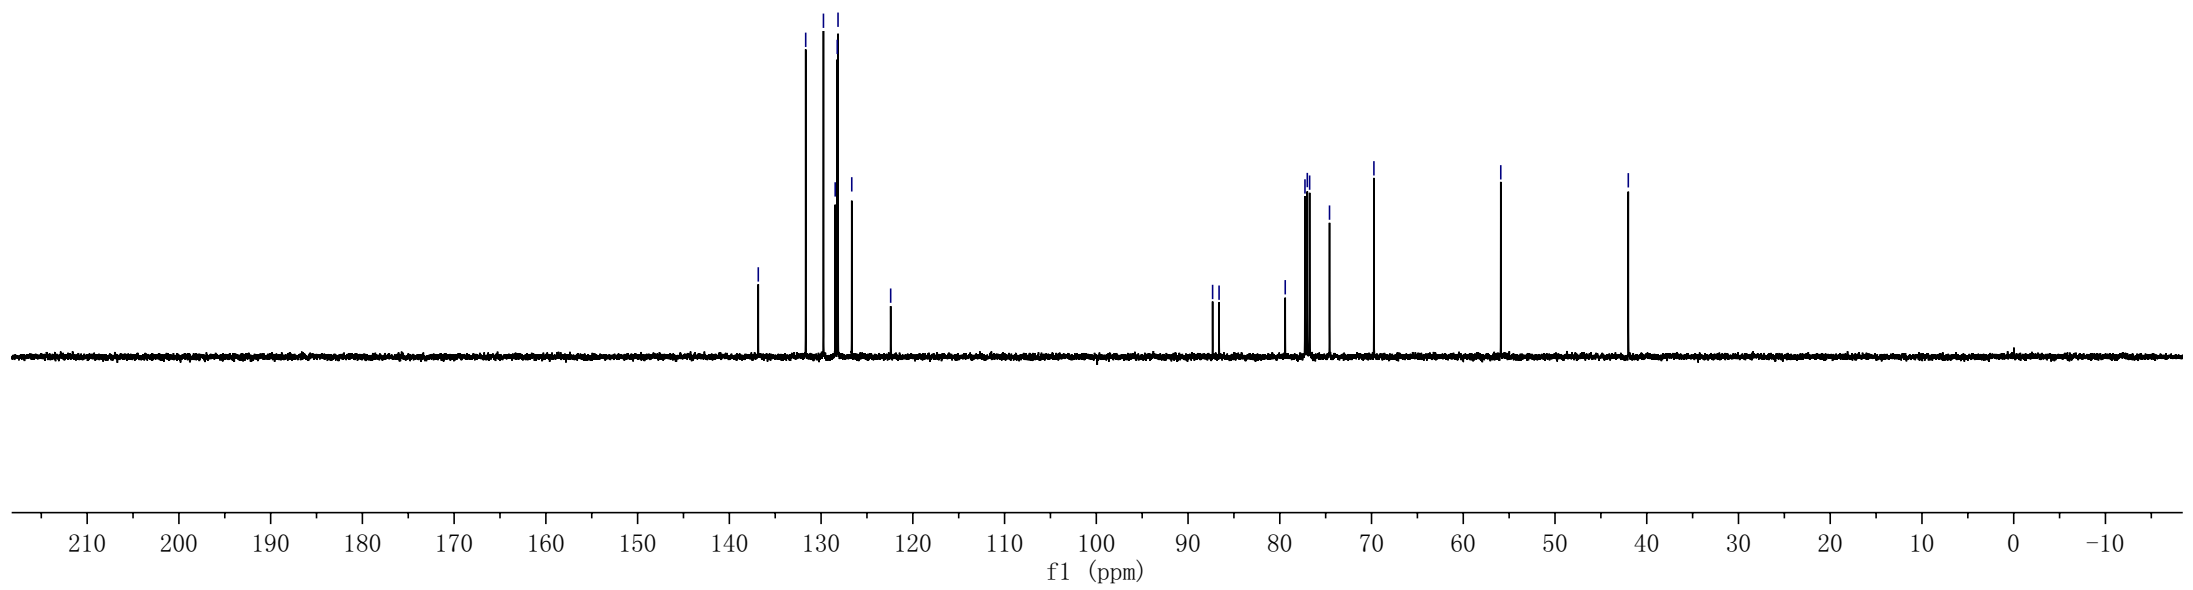



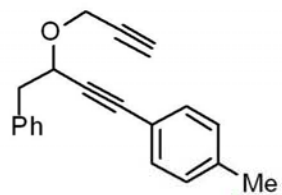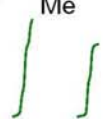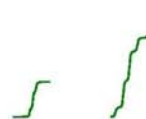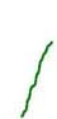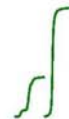

C (m)  
7.39

B (d)  
7.19

A (t)  
4.83

D (qd)  
4.46

E (m)  
3.24

F (dt)  
2.50

G (s)  
2.42

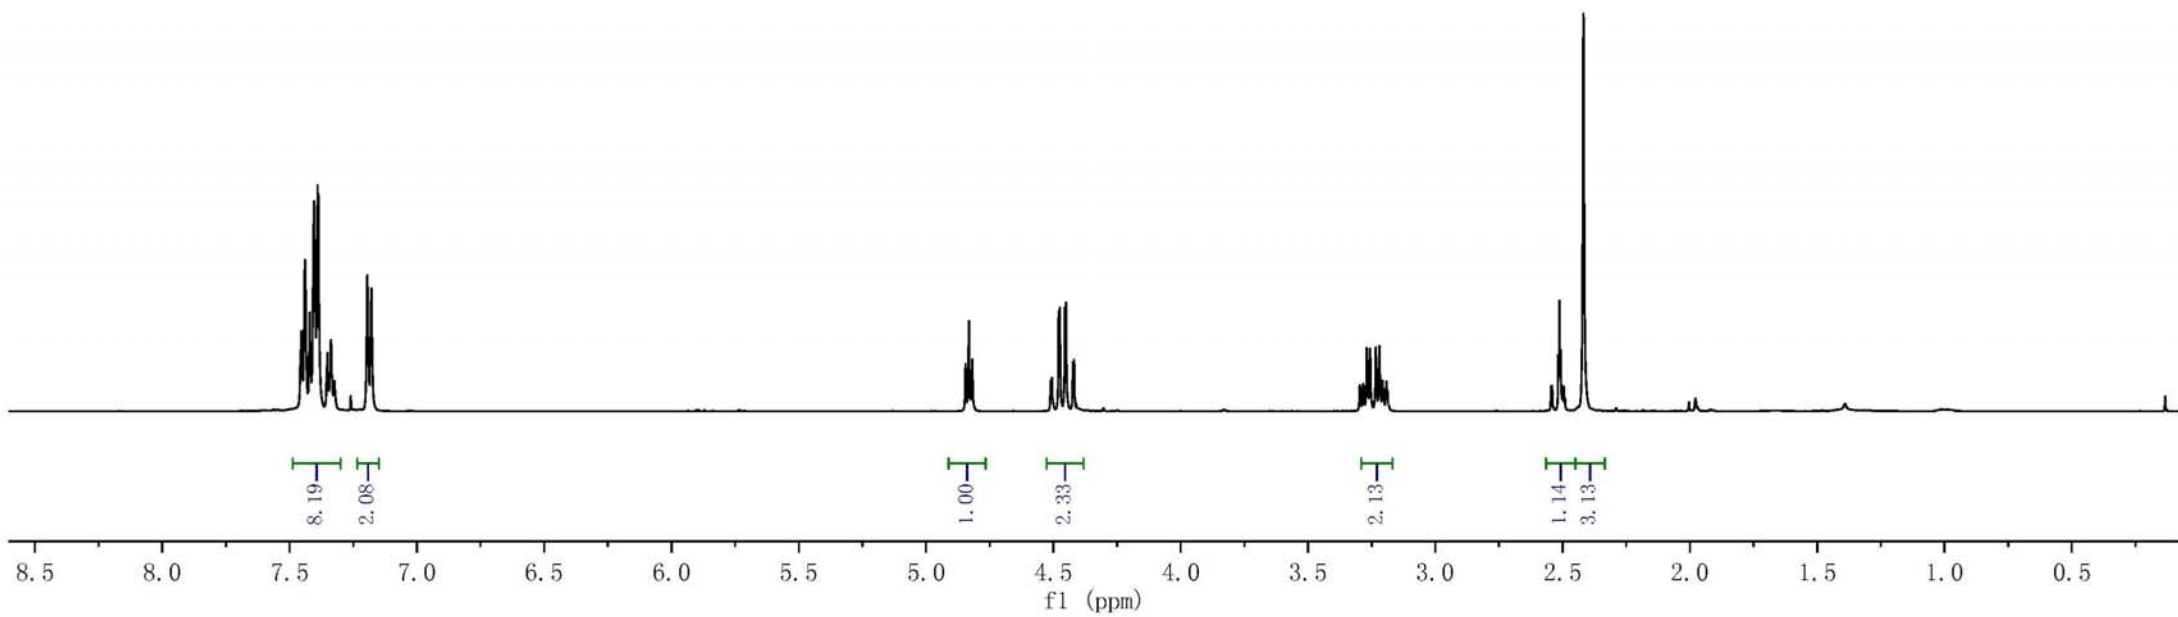

138.45  
136.81  
131.47  
129.65  
128.90  
128.02  
126.52  
119.24

87.37  
85.87

79.38

74.53

69.64

55.73

41.94

21.32

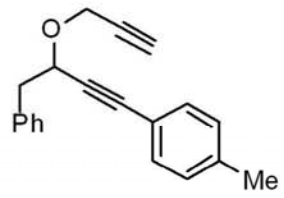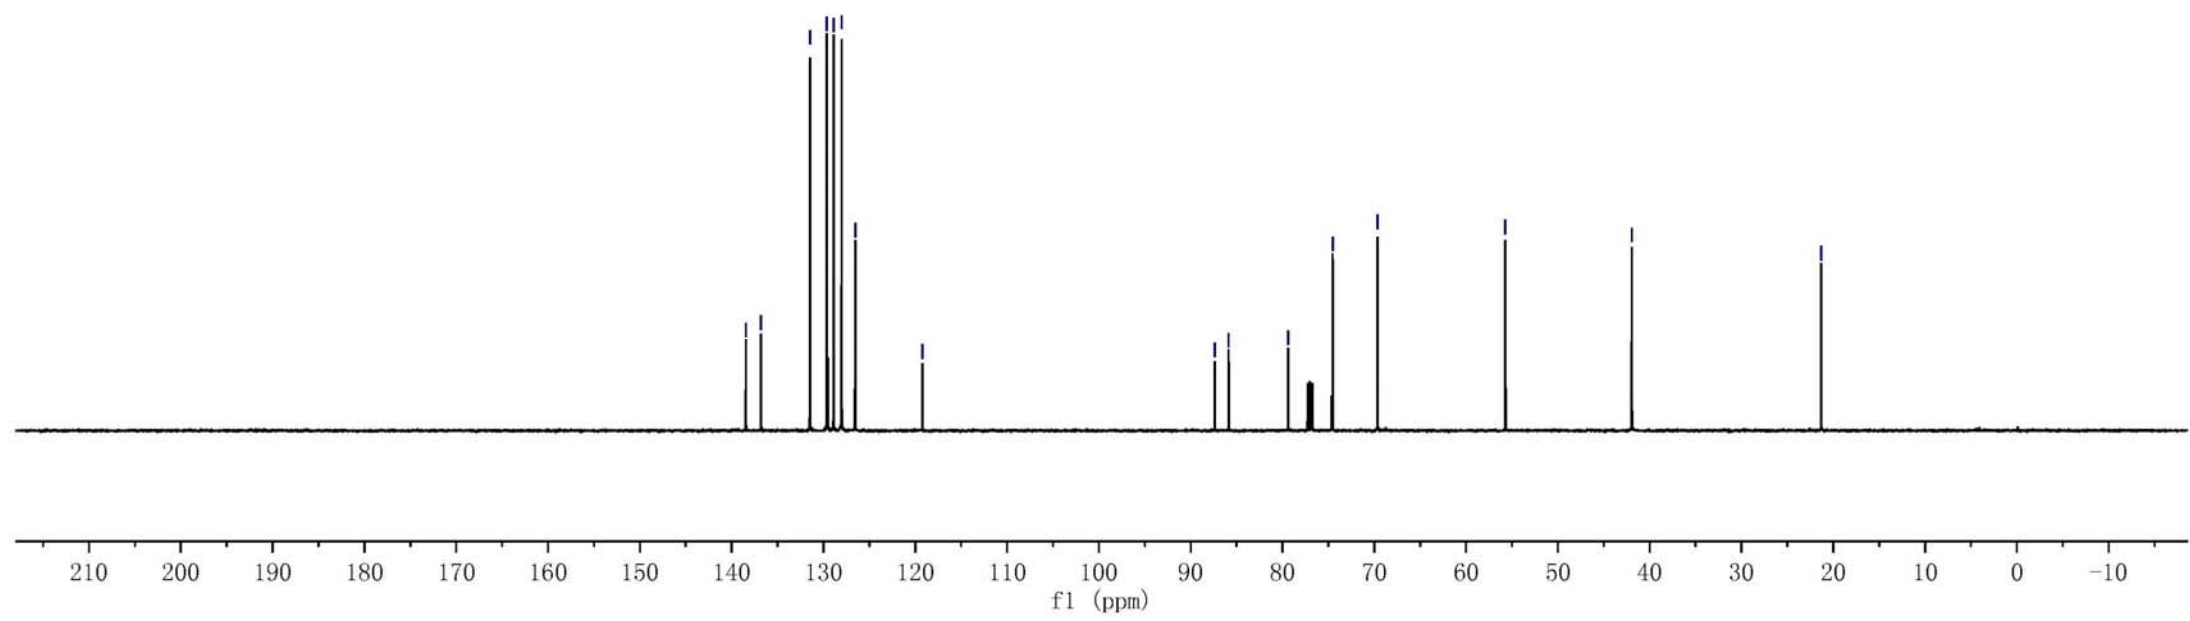

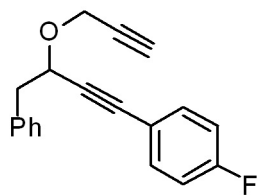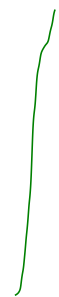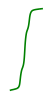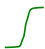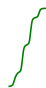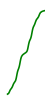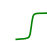

|       |       |
|-------|-------|
| F (m) | E (t) |
| 7.34  | 7.02  |

|       |        |
|-------|--------|
| A (t) | B (qd) |
| 4.76  | 4.40   |

|       |
|-------|
| C (m) |
| 3.16  |

|       |
|-------|
| D (m) |
| 2.48  |

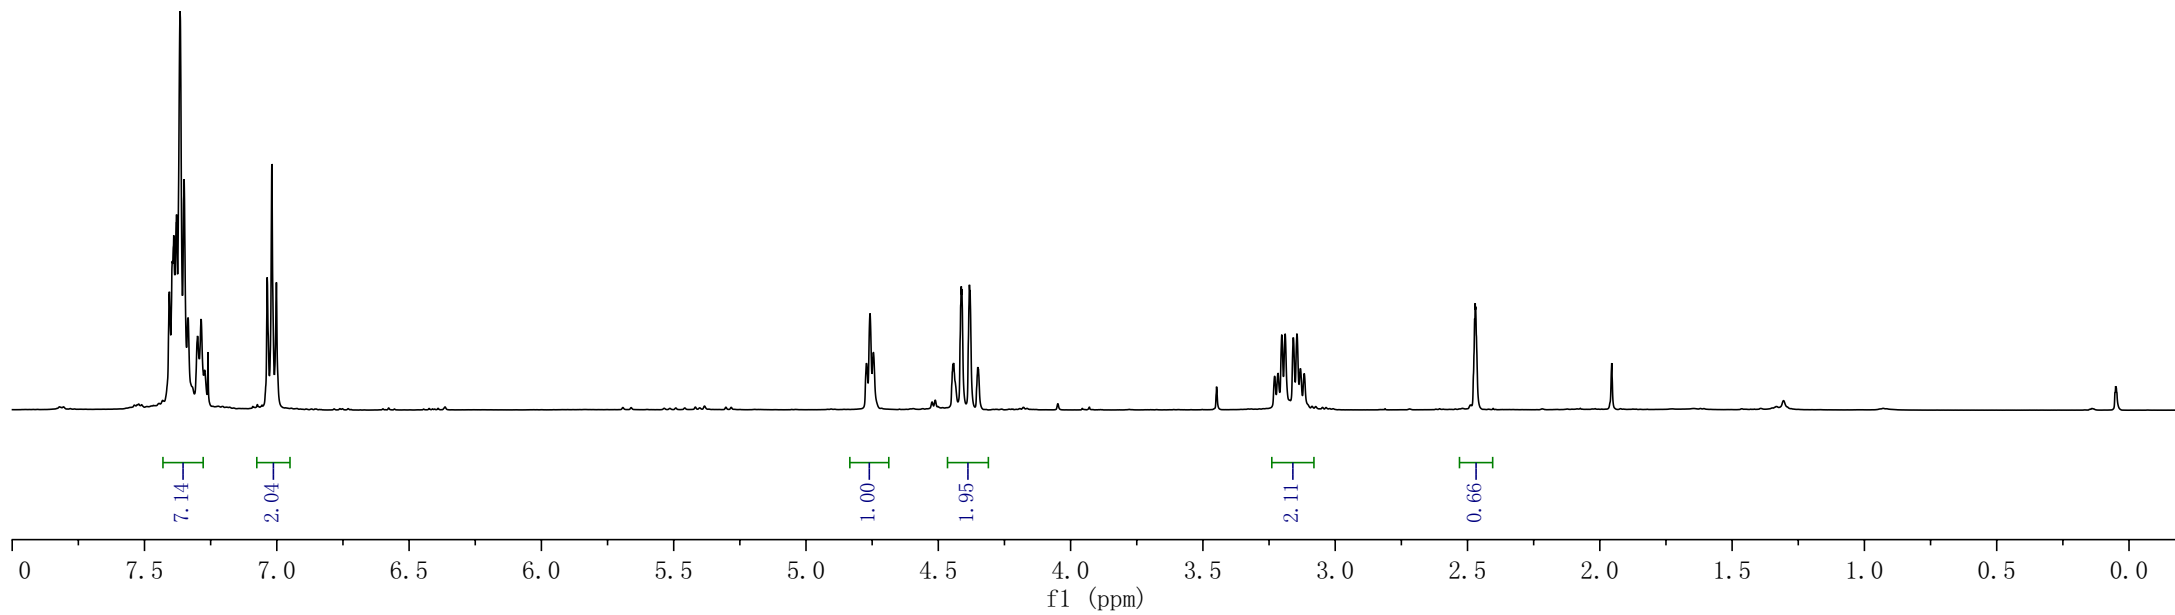

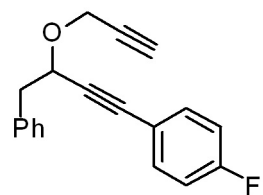

163.52  
161.54

136.76  
133.60  
133.53  
129.70  
128.13  
126.66

118.45  
118.42  
115.60  
115.42

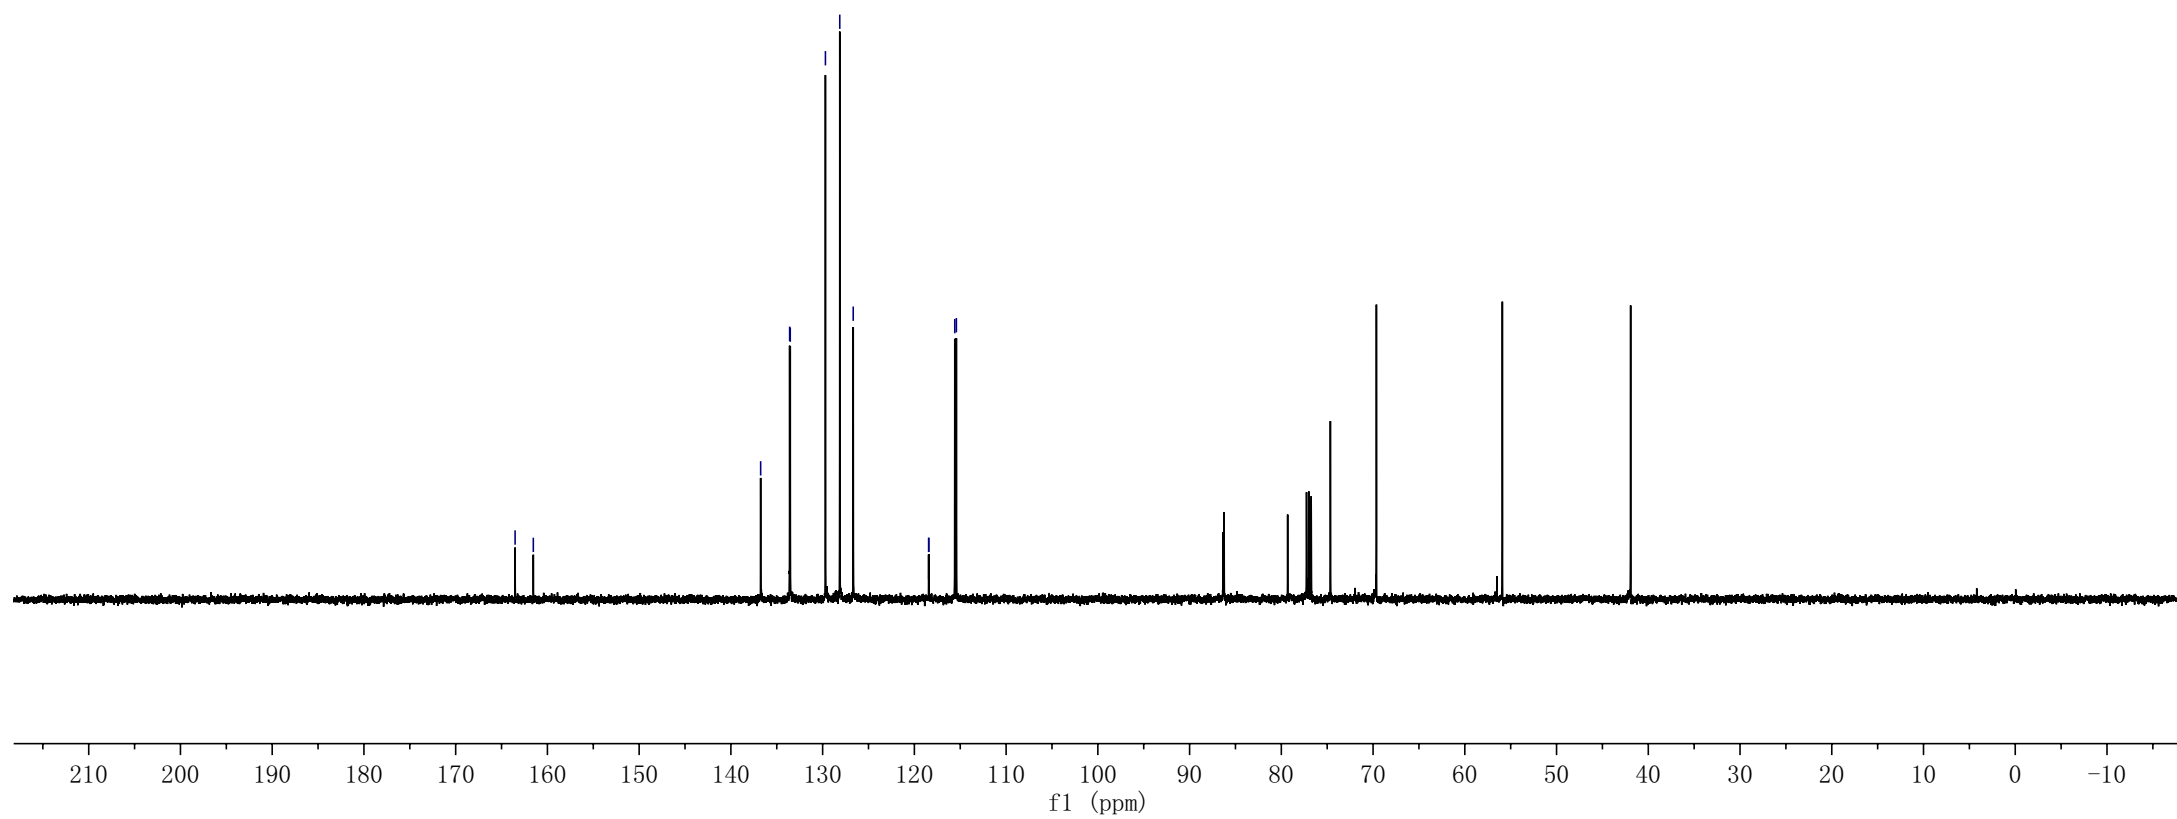

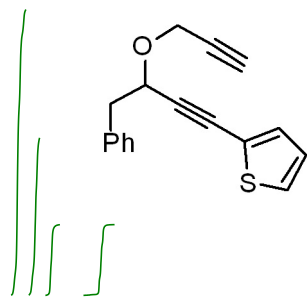

H (m)  
7.24

F (dd)  
7.17

E (dd)  
6.95

G (m)  
7.31

A (t)  
4.72

B (m)  
4.34

C (qd)  
3.13

D (t)  
2.42

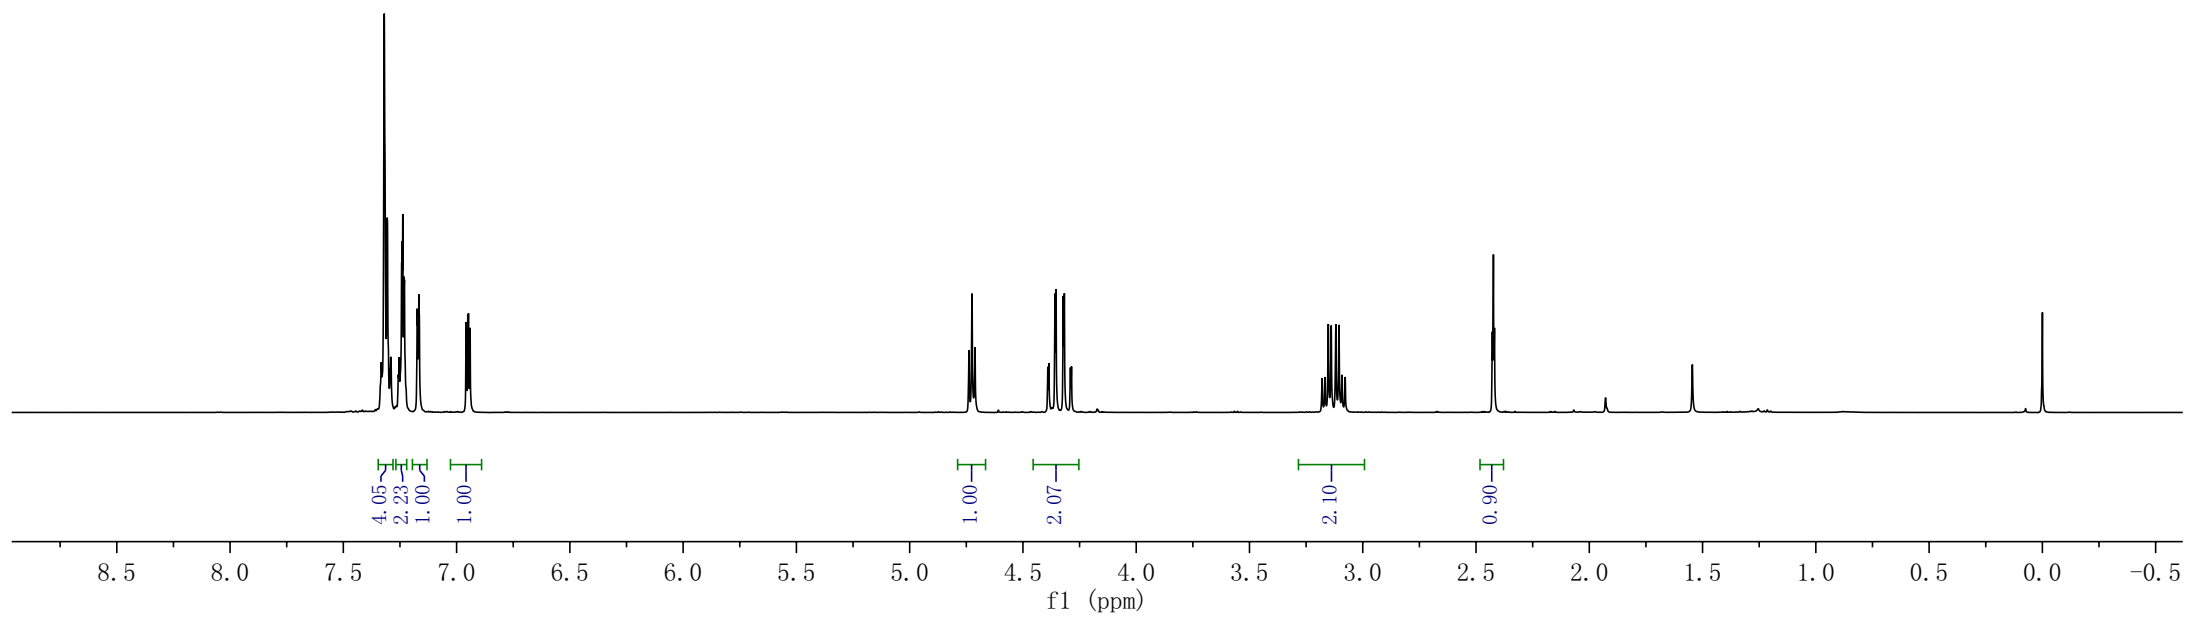

JKG-20150327-DB-1-6f  
C13 NMR (CDCl<sub>3</sub>, 125 MHz, 25 °C) ZHL 33

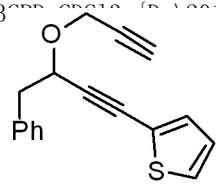

136.68  
132.34  
129.72  
128.19  
127.36  
126.90  
126.69  
122.27

90.60

80.59  
79.30  
77.25  
77.00  
76.75  
74.69  
69.81

56.01

41.86

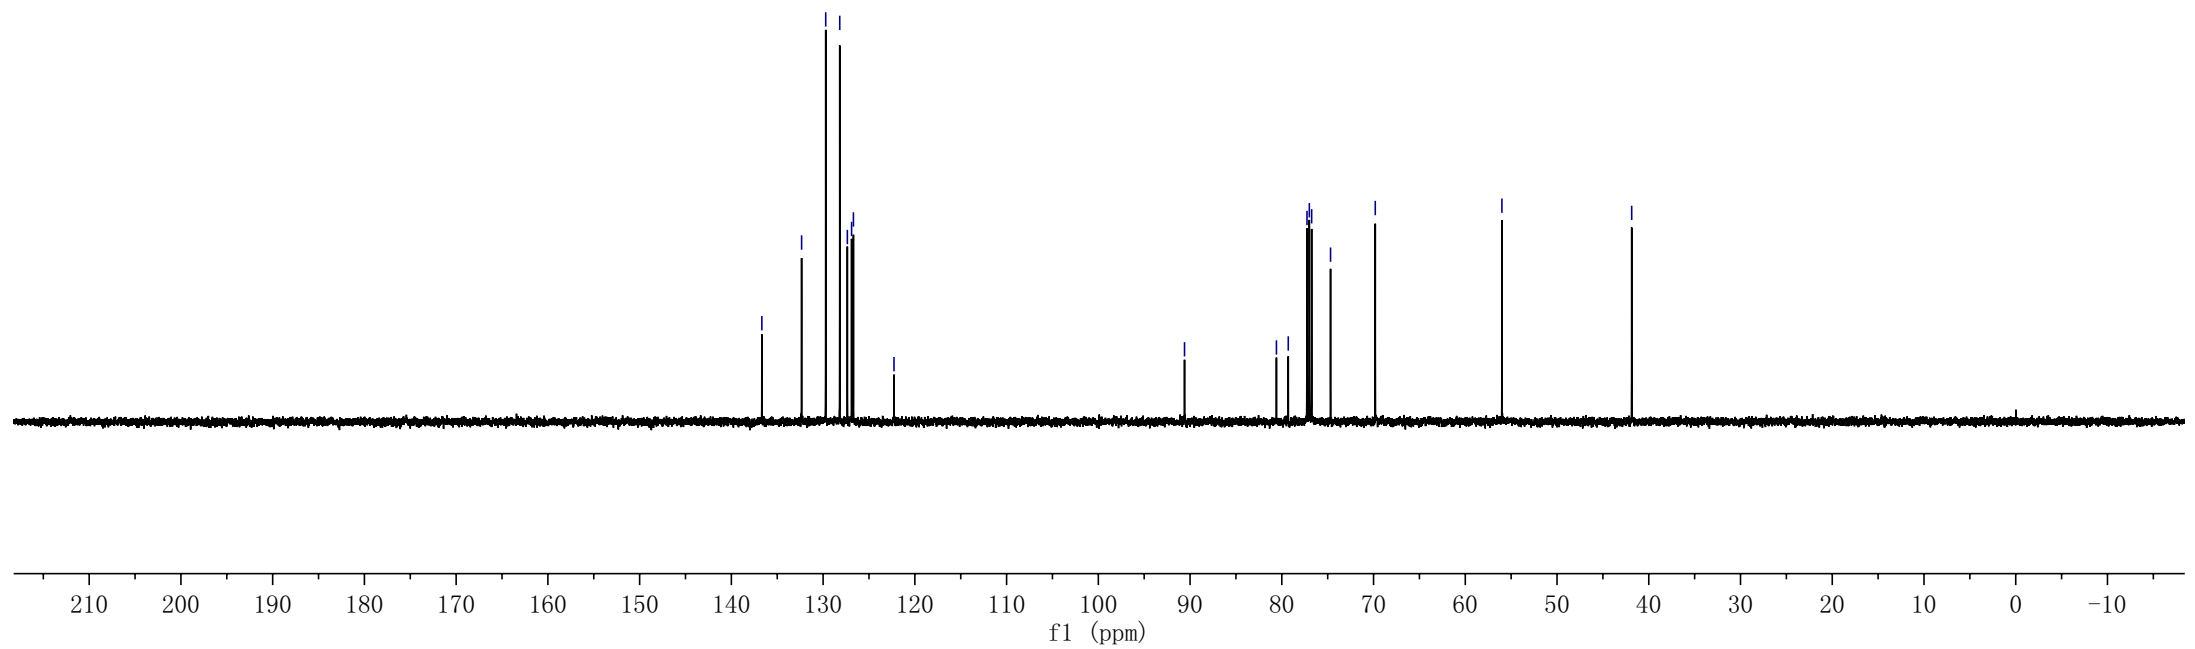

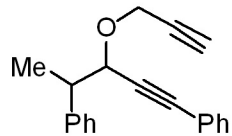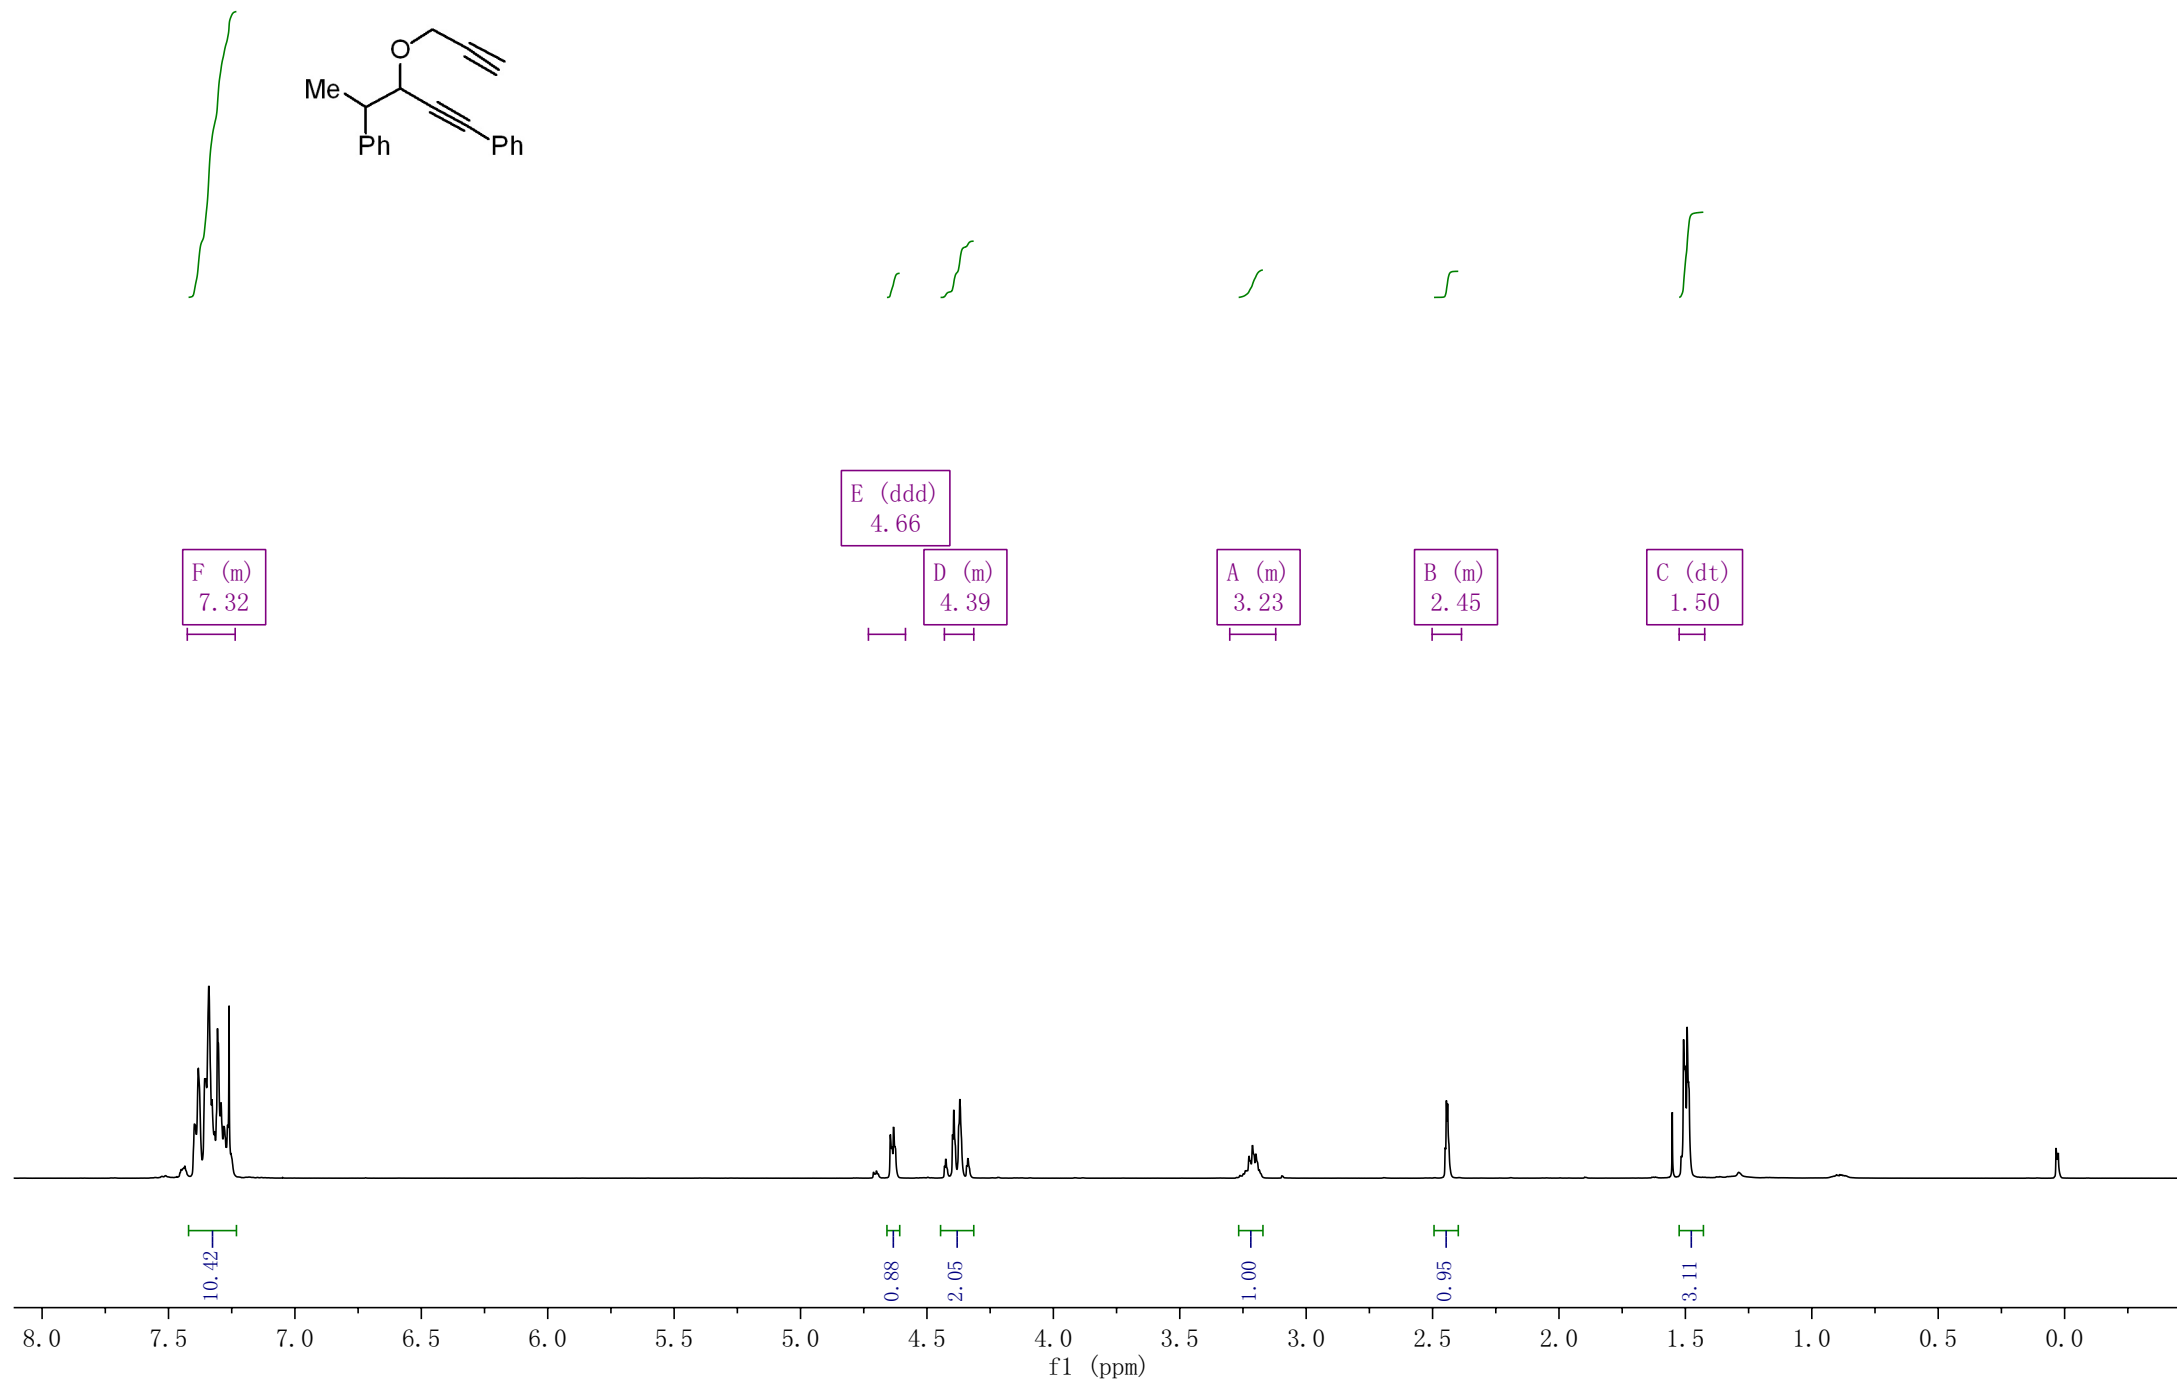

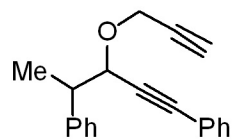

142.64  
131.71  
131.64  
128.38  
128.34  
128.26  
128.19  
128.15  
128.11  
128.00  
126.70  
122.53

87.50  
86.25  
79.57  
77.25  
77.00  
76.75  
74.47  
73.60

56.05

44.74

17.22

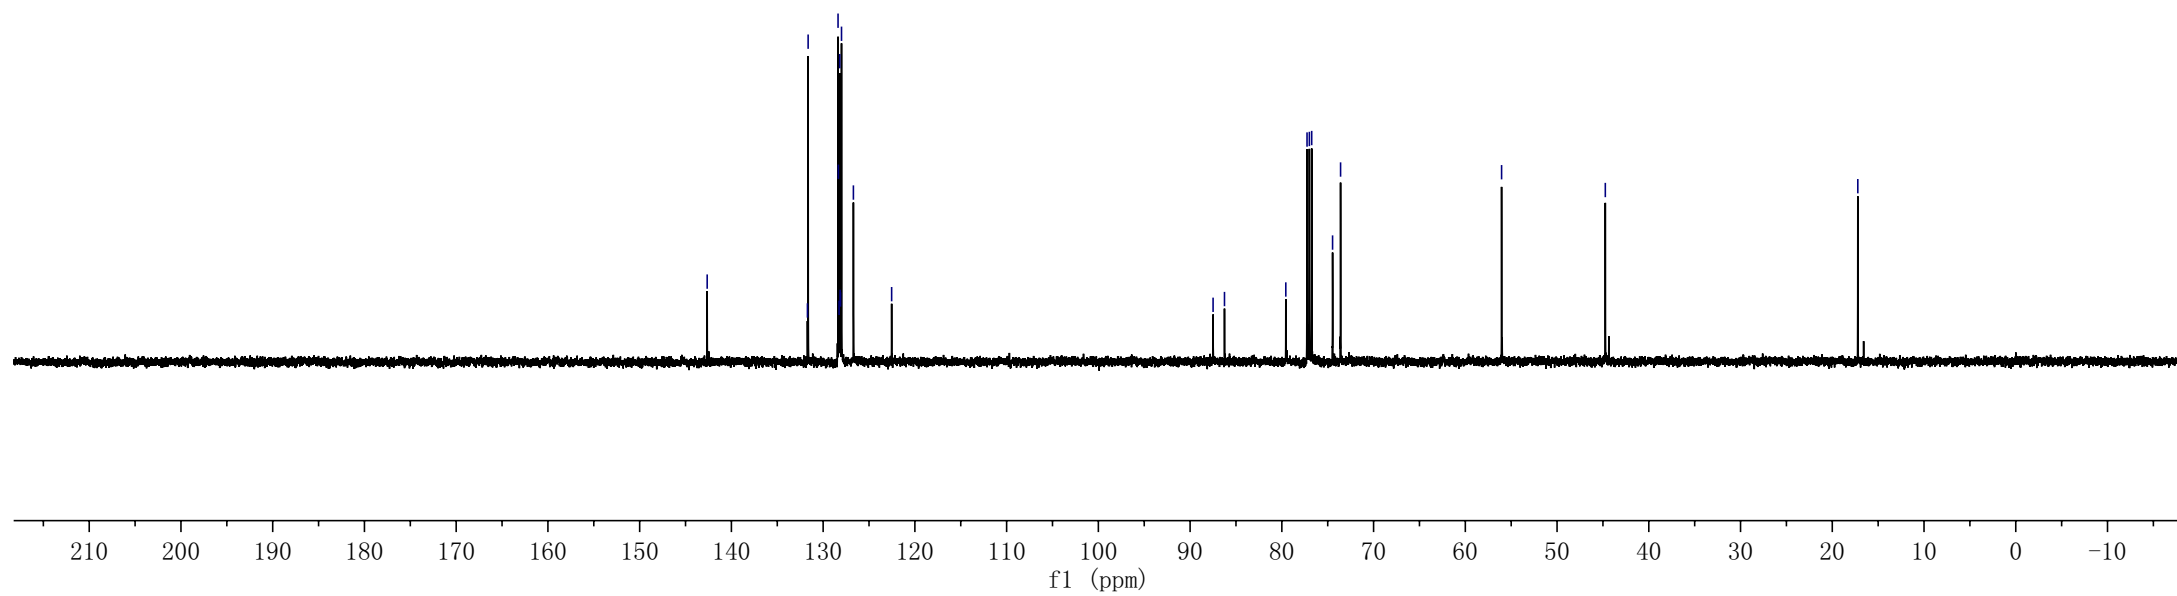



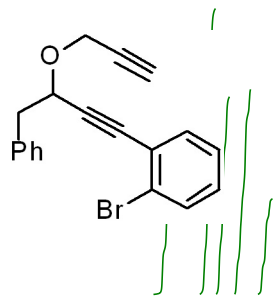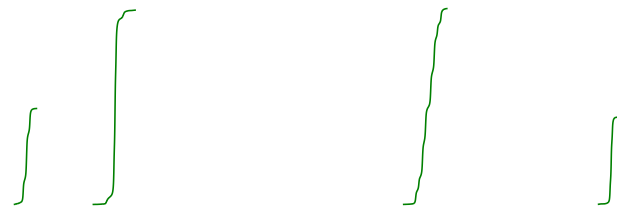

H (m)  
7.27

F (m)  
7.41

E (dd)  
7.59

I (td)  
7.18

G (dd)  
7.35

A (dt)  
4.85

B (m)  
4.47

C (ddd)  
3.21

D (t)  
2.47

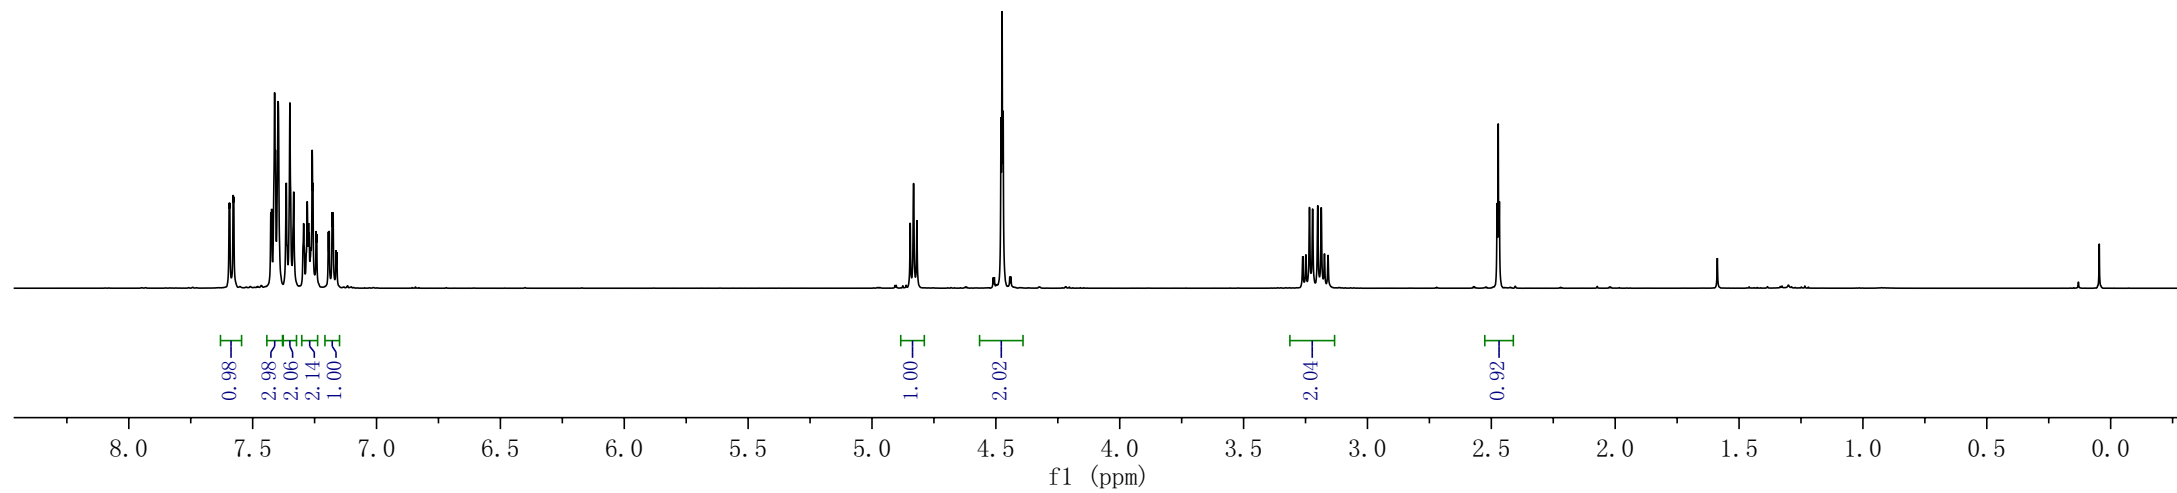

136.63  
133.41  
132.30  
129.74  
129.60  
128.16  
126.89  
126.66  
125.42  
124.54

91.29

85.76

79.32

77.25

77.00

76.75

74.69

69.63

55.96

41.73

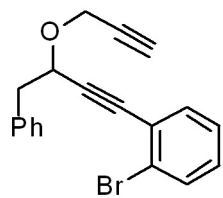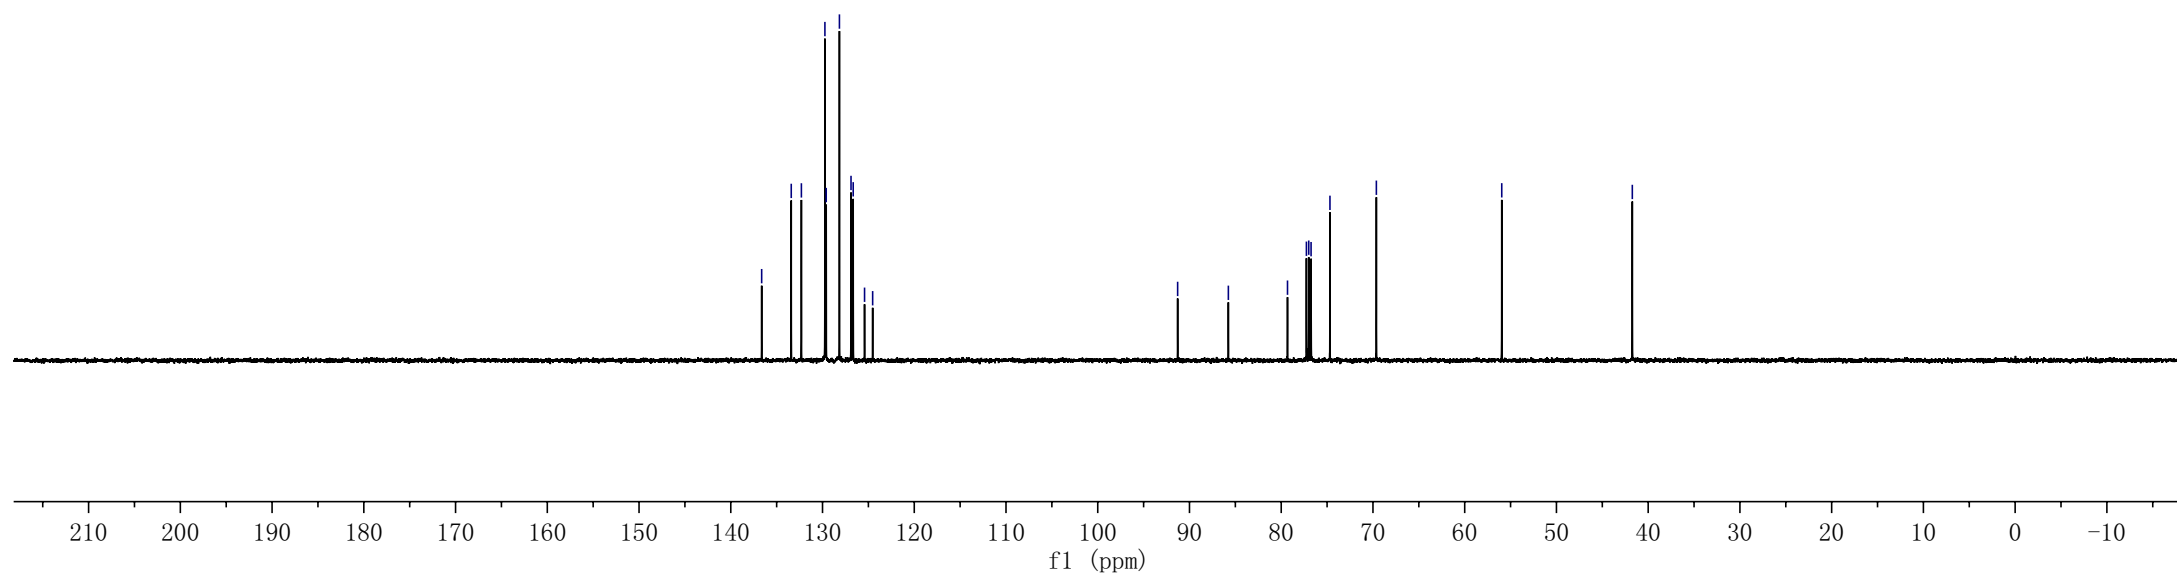

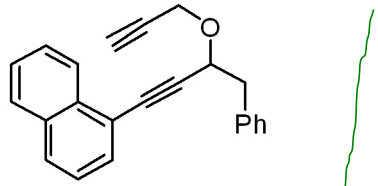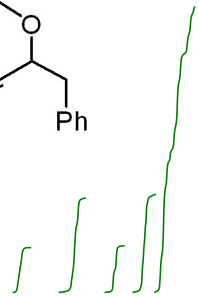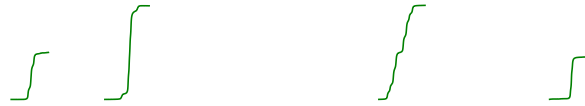

|       |        |
|-------|--------|
| F (m) | I (m)  |
| 7.86  | 7.39   |
| E (m) | G (dd) |
| 8.11  | 7.67   |
|       | H (m)  |
|       | 7.54   |

|       |       |         |       |
|-------|-------|---------|-------|
| A (m) | B (m) | C (ddd) | D (t) |
| 4.96  | 4.53  | 3.30    | 2.52  |

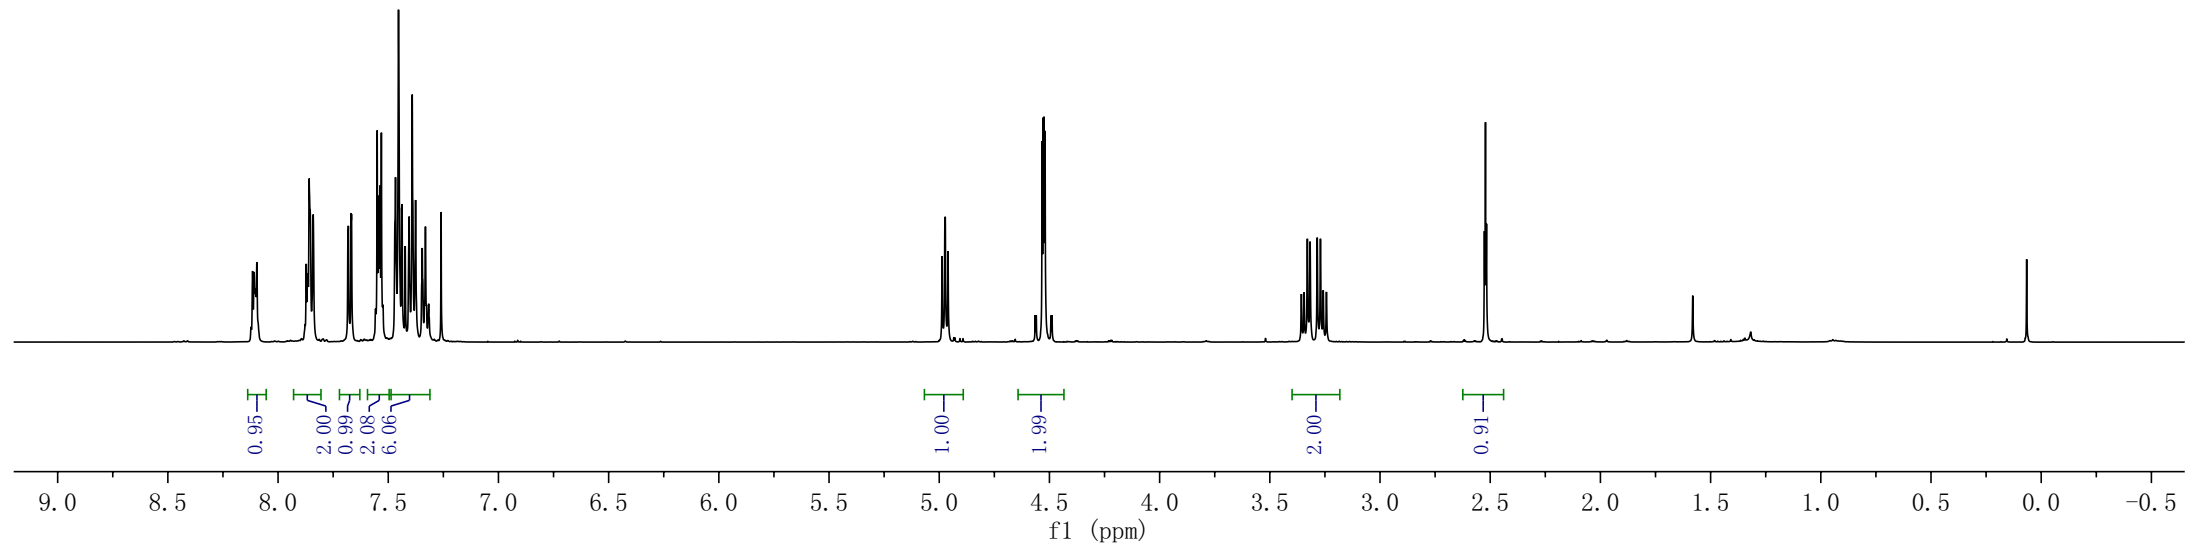

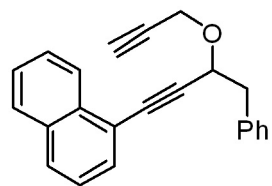

136.85  
133.18  
133.01  
130.57  
129.82  
128.91  
128.26  
128.16  
126.73  
126.70  
126.35  
126.08  
125.06  
120.01

91.41

85.52

79.41

77.25

77.00

76.75

74.74

69.98

56.02

42.05

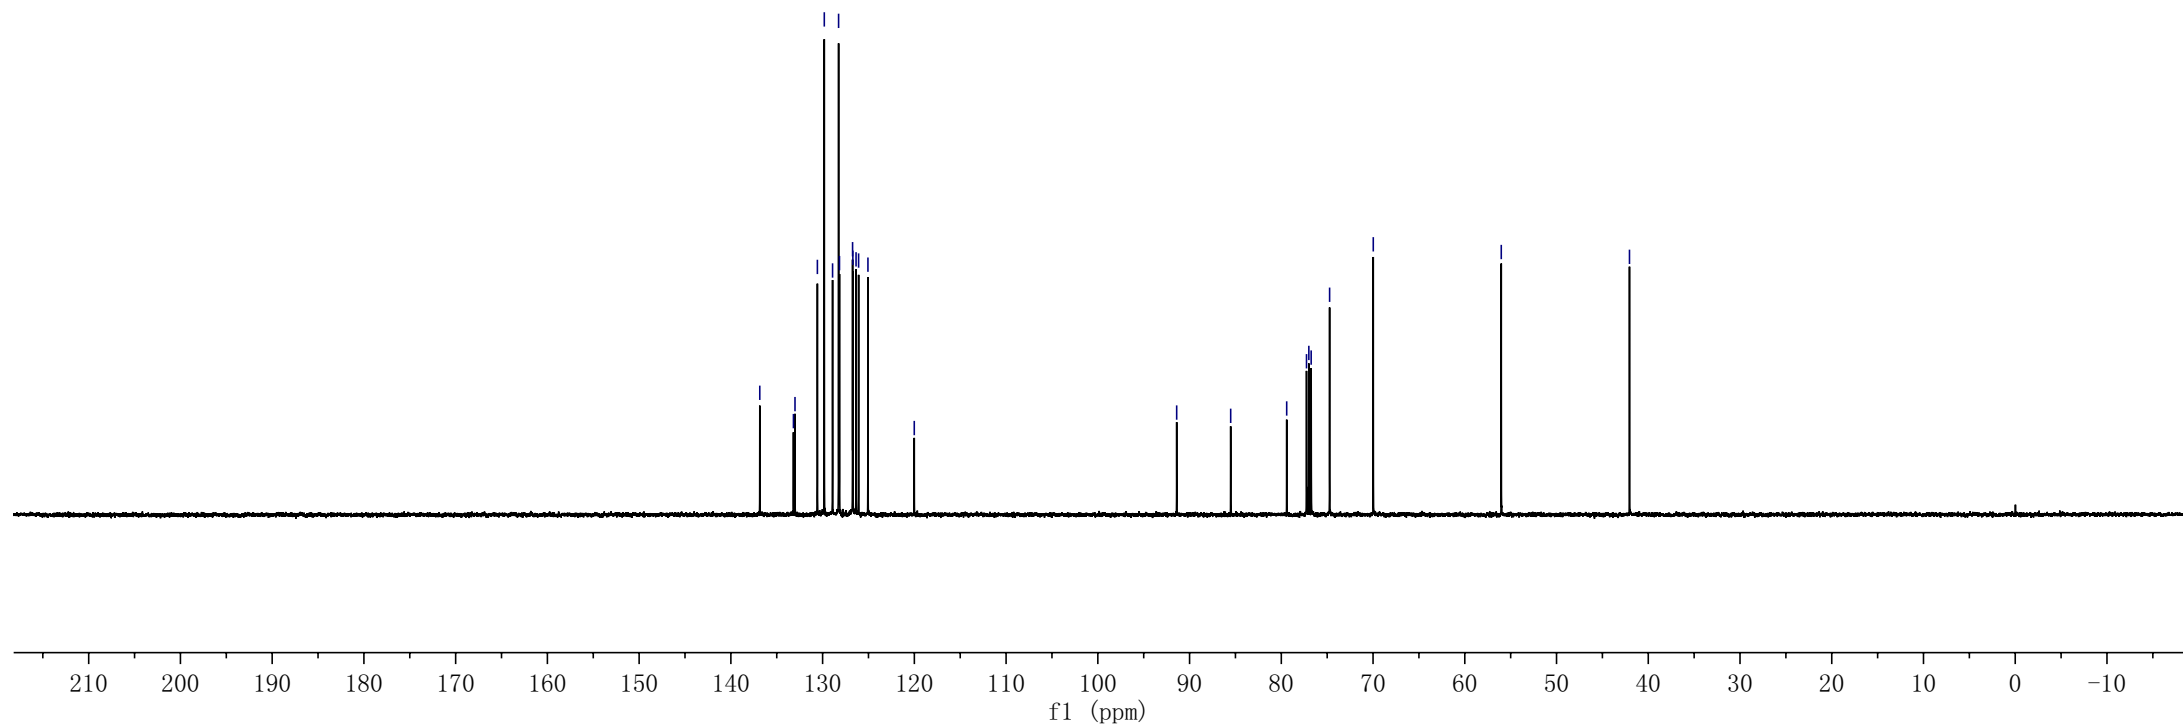

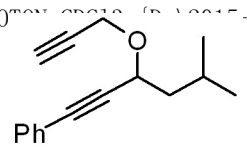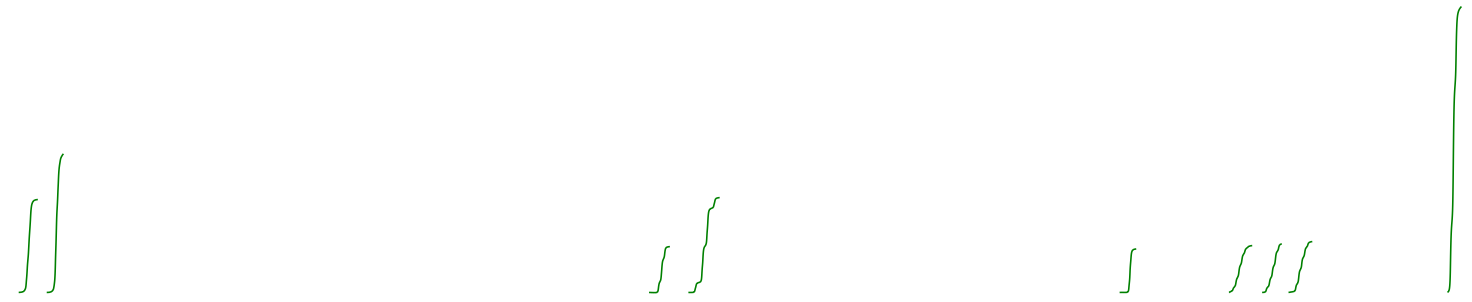

D (m)  
7.31  
C (dd)  
7.44

B (qd)  
4.37  
A (t)  
4.57

G (dt)  
1.80  
E (t)  
2.45  
F (tt)  
1.94  
H (dt)  
1.67

I (t)  
0.98

2.00  
2.98

0.99  
2.04

0.94

1.01  
1.05  
1.10

6.15

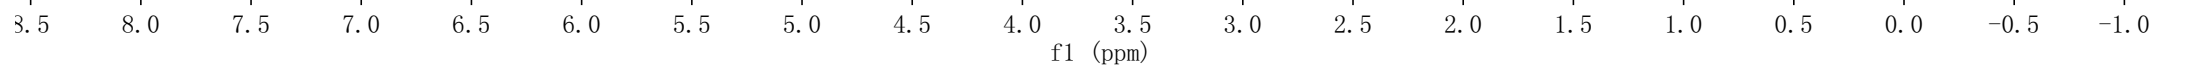

JKG-20150316-1-68A

C13 NMR (CDCl<sub>3</sub>) {J=125.1 Hz}

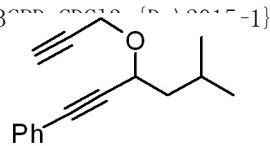

138.74

128.38

128.26

122.61

87.51

86.13

79.70

77.25

77.00

76.75

74.32

67.36

55.72

44.55

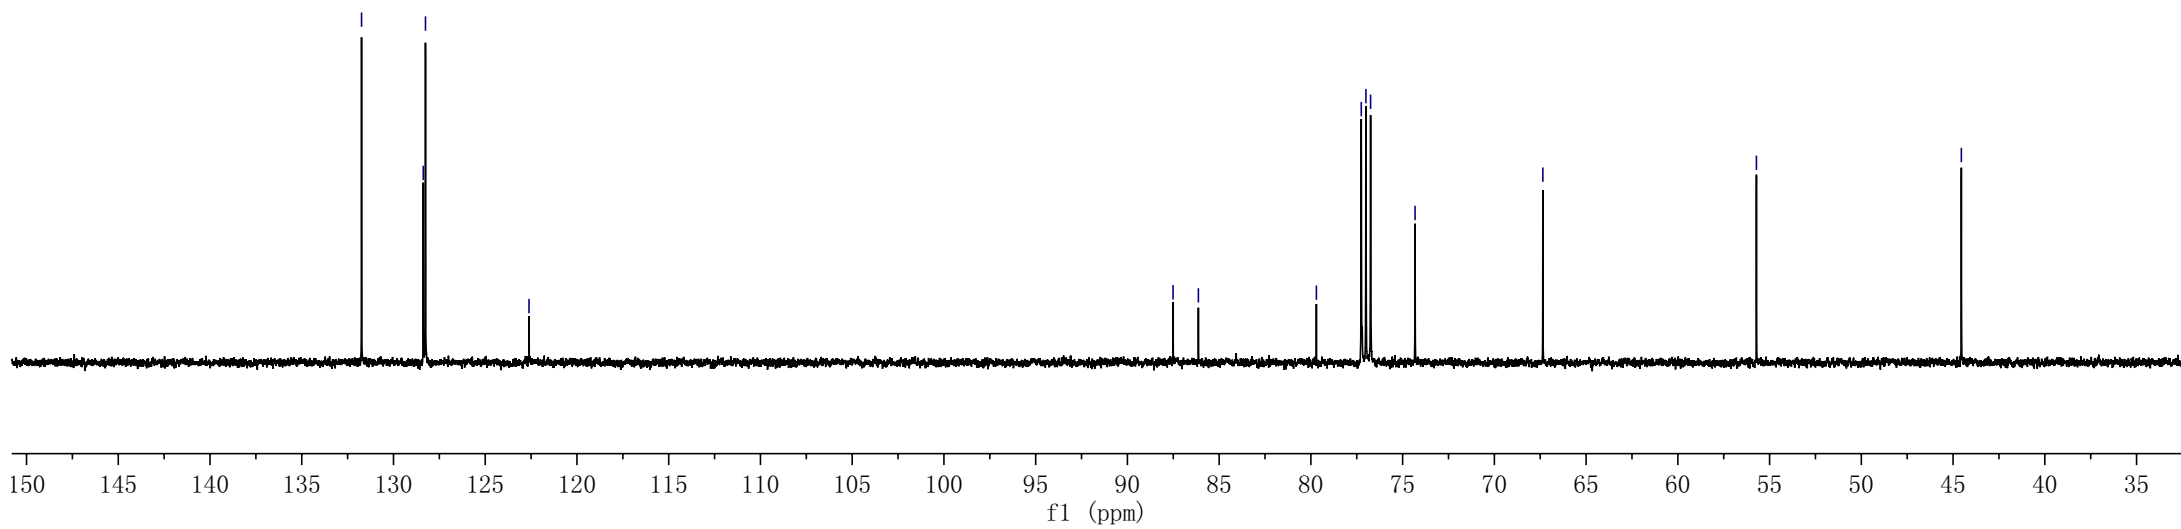

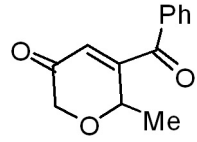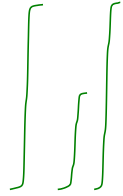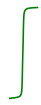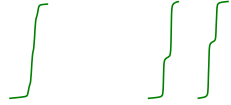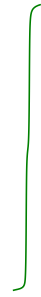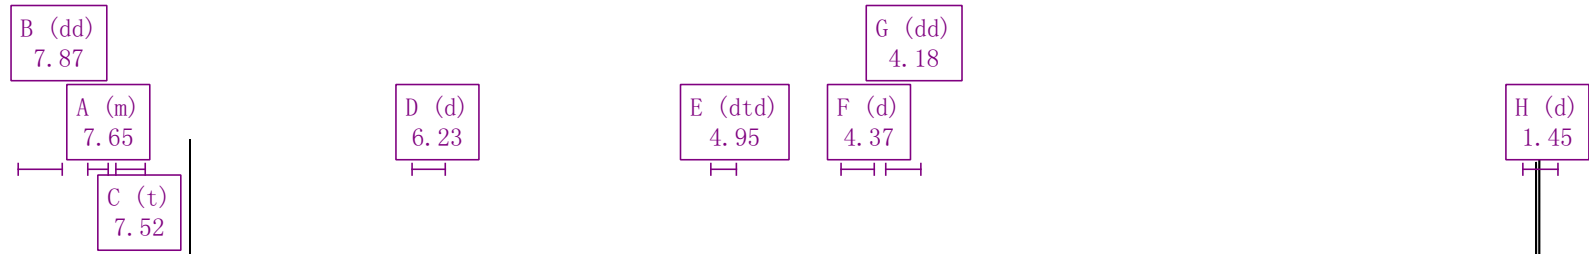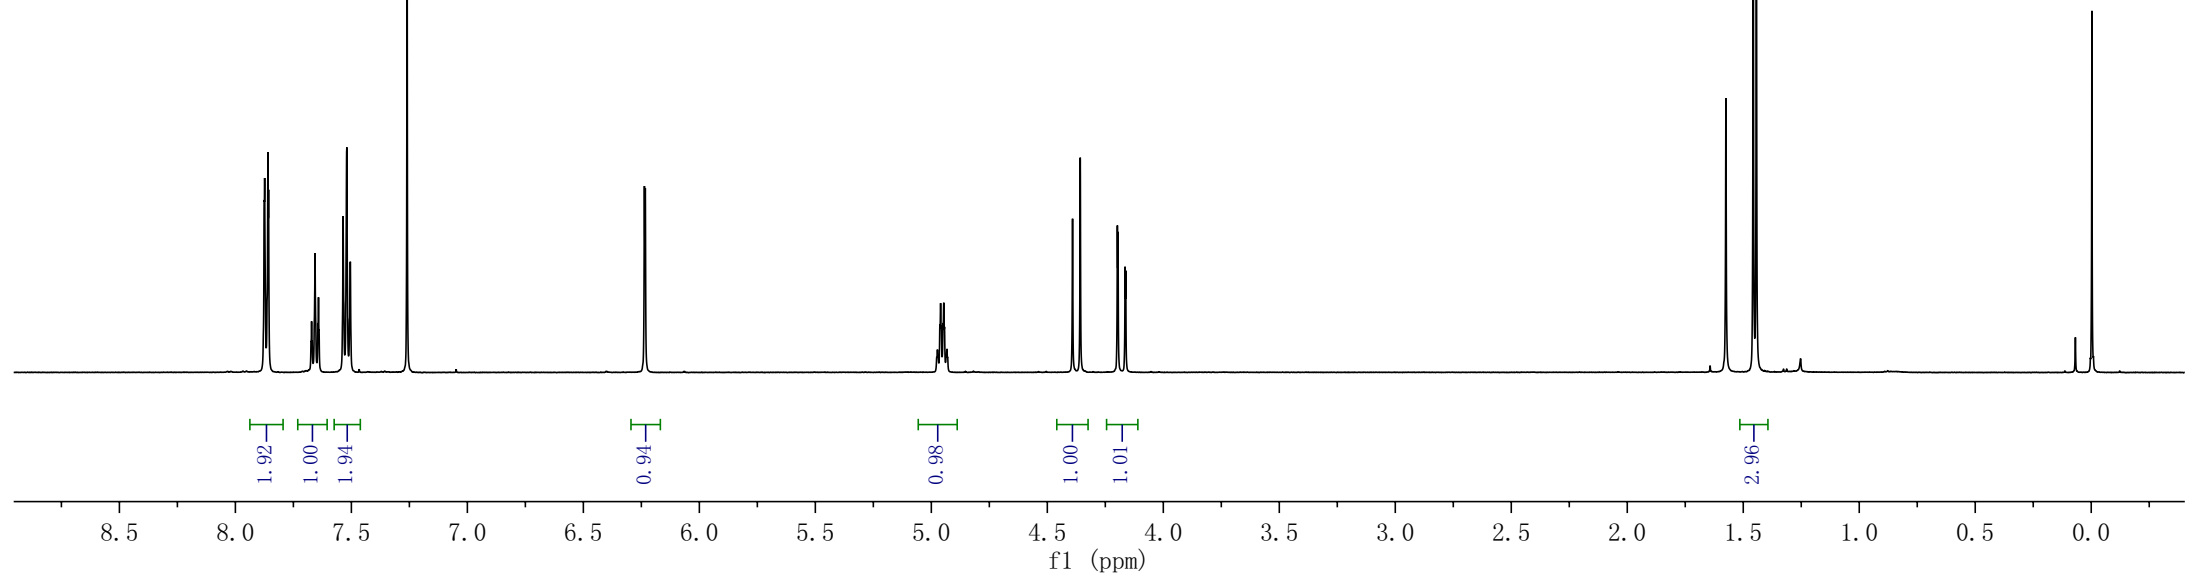

JKG-20150508-LX-118D  
C13CPD CDC13 {DMSO-d6-15-1} ZHL 4

197.94  
195.77

158.85

135.16  
134.25  
129.71  
128.92  
127.40

77.25  
77.00  
76.75  
70.65  
70.17

18.14

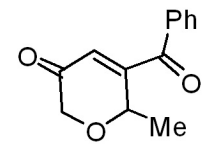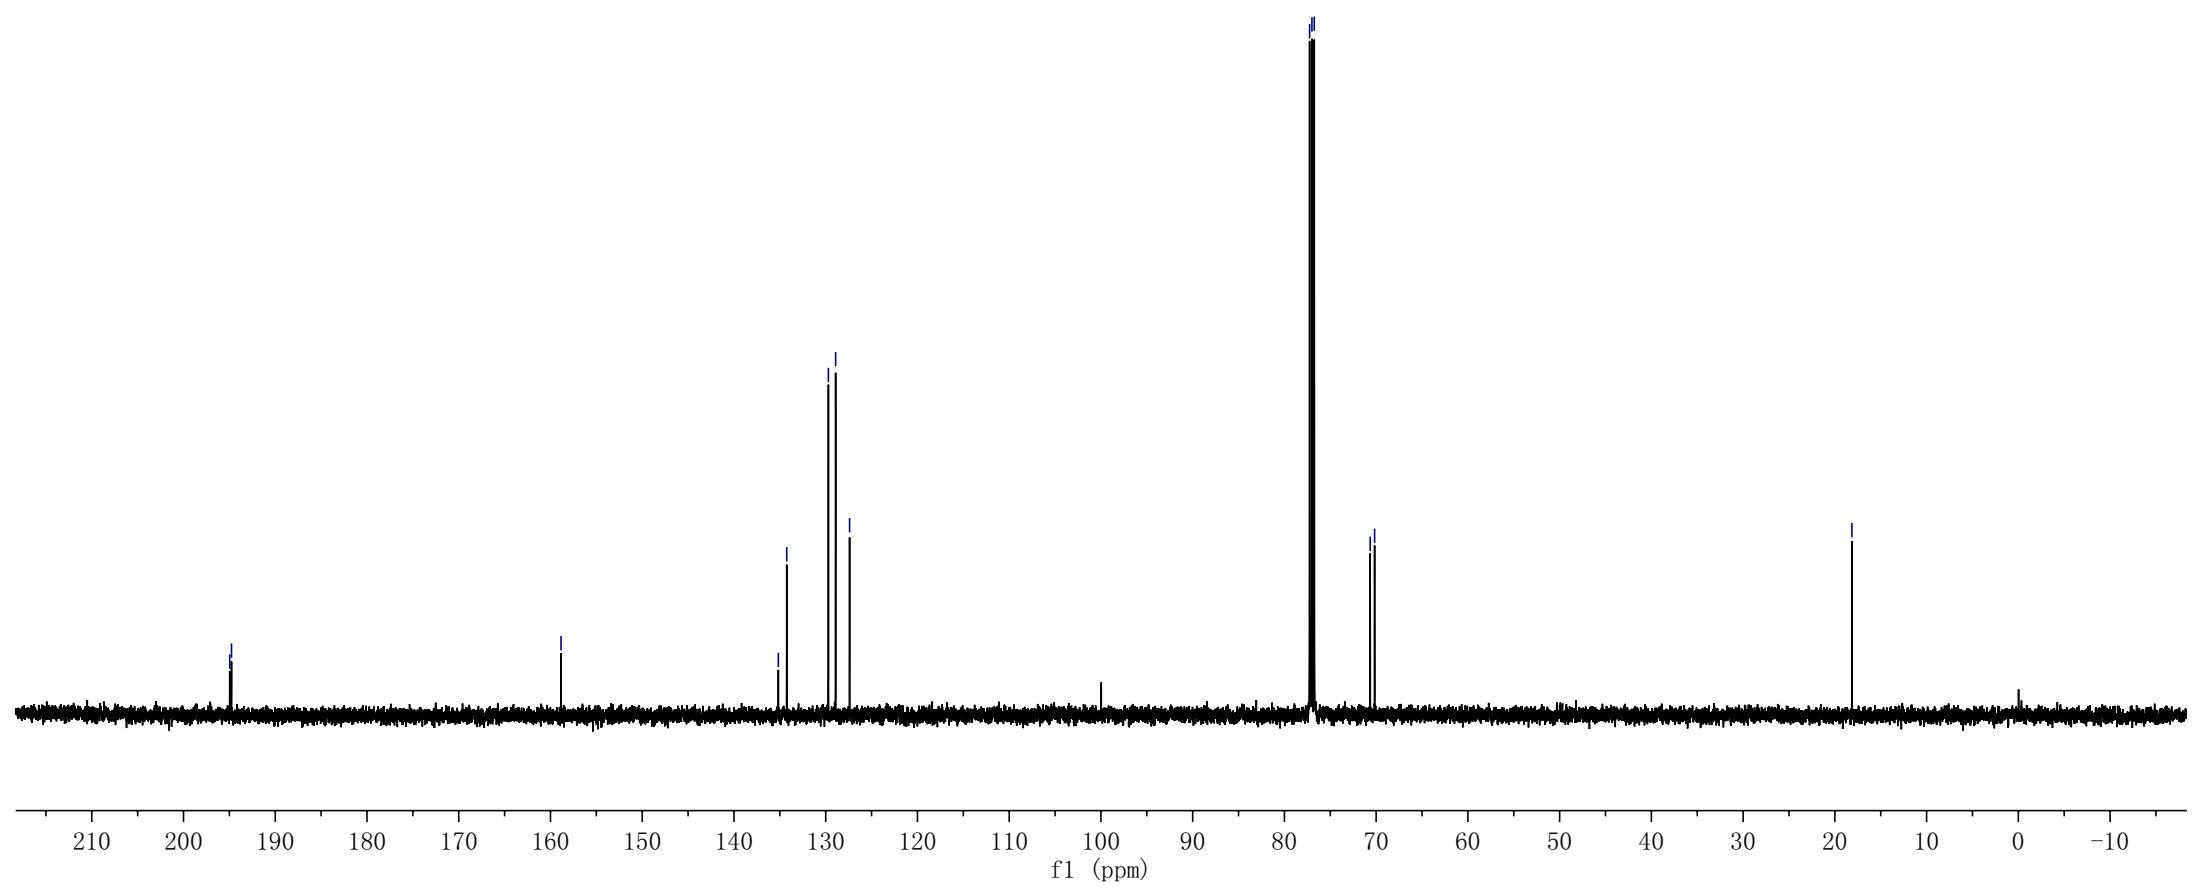



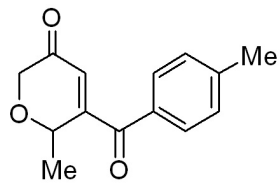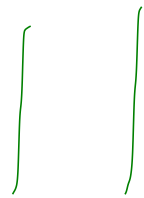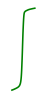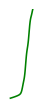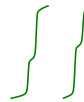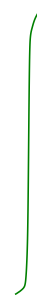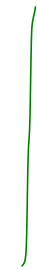

F (d)  
7.83

E (d)  
7.36

D (s)  
6.26

A (dd)  
4.99

B (d)  
4.41

C (d)  
4.22

G (s)  
2.49

H (m)  
1.47

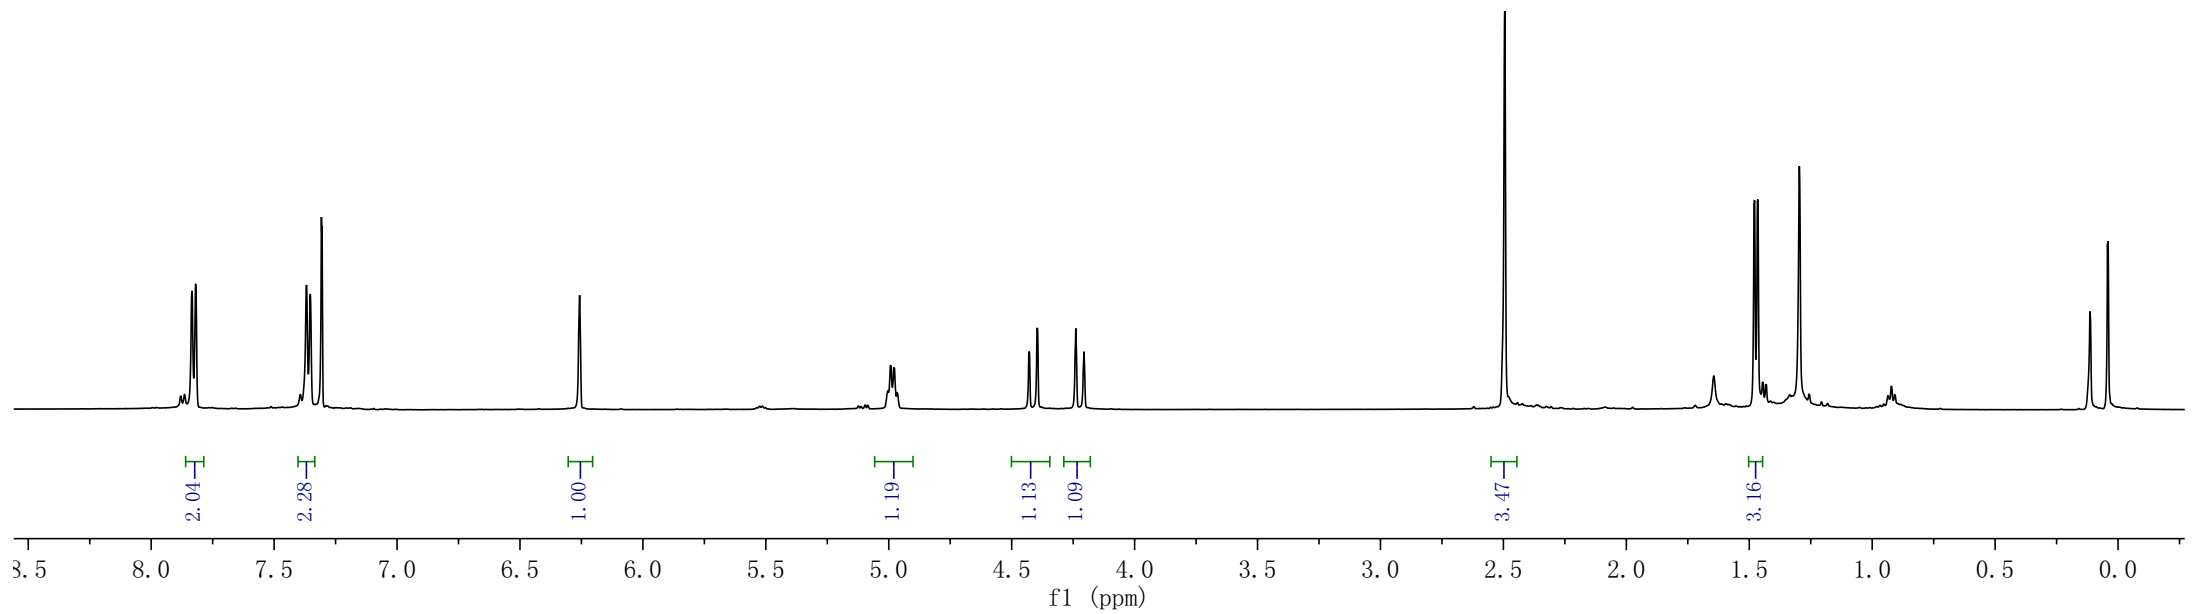

191.86  
190.39

159.28

145.64

132.58  
129.95  
129.68  
126.90

77.31  
77.05  
76.80  
70.79  
70.34

21.85  
18.19

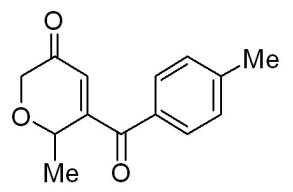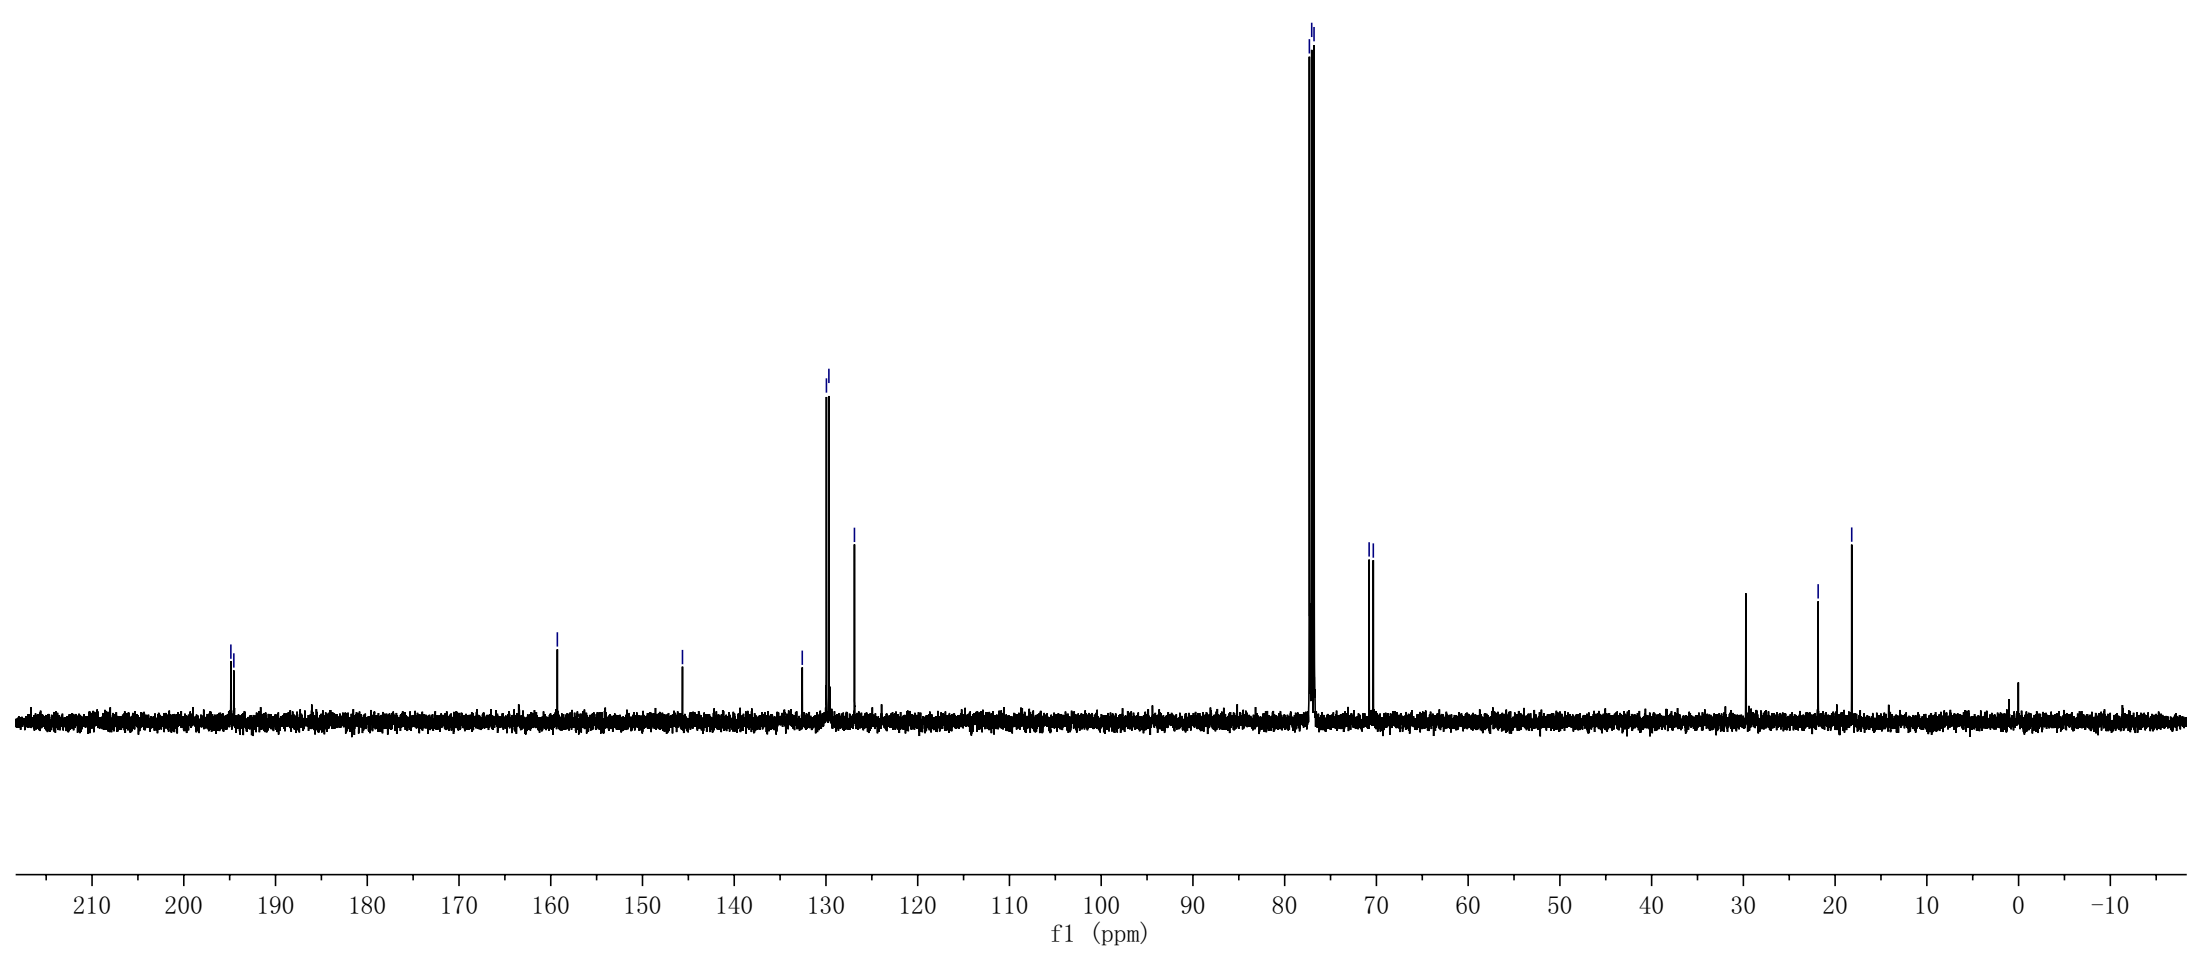

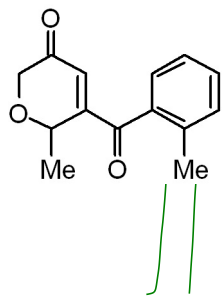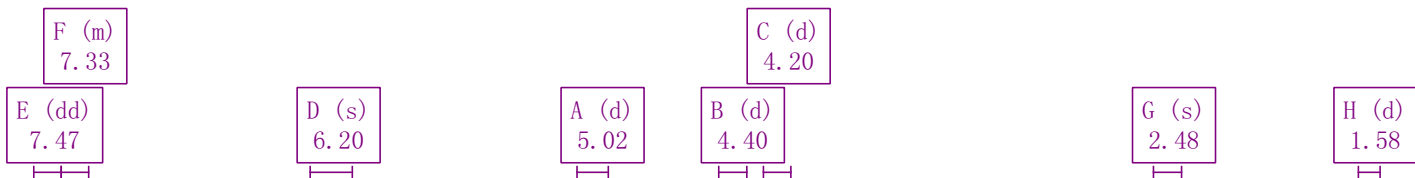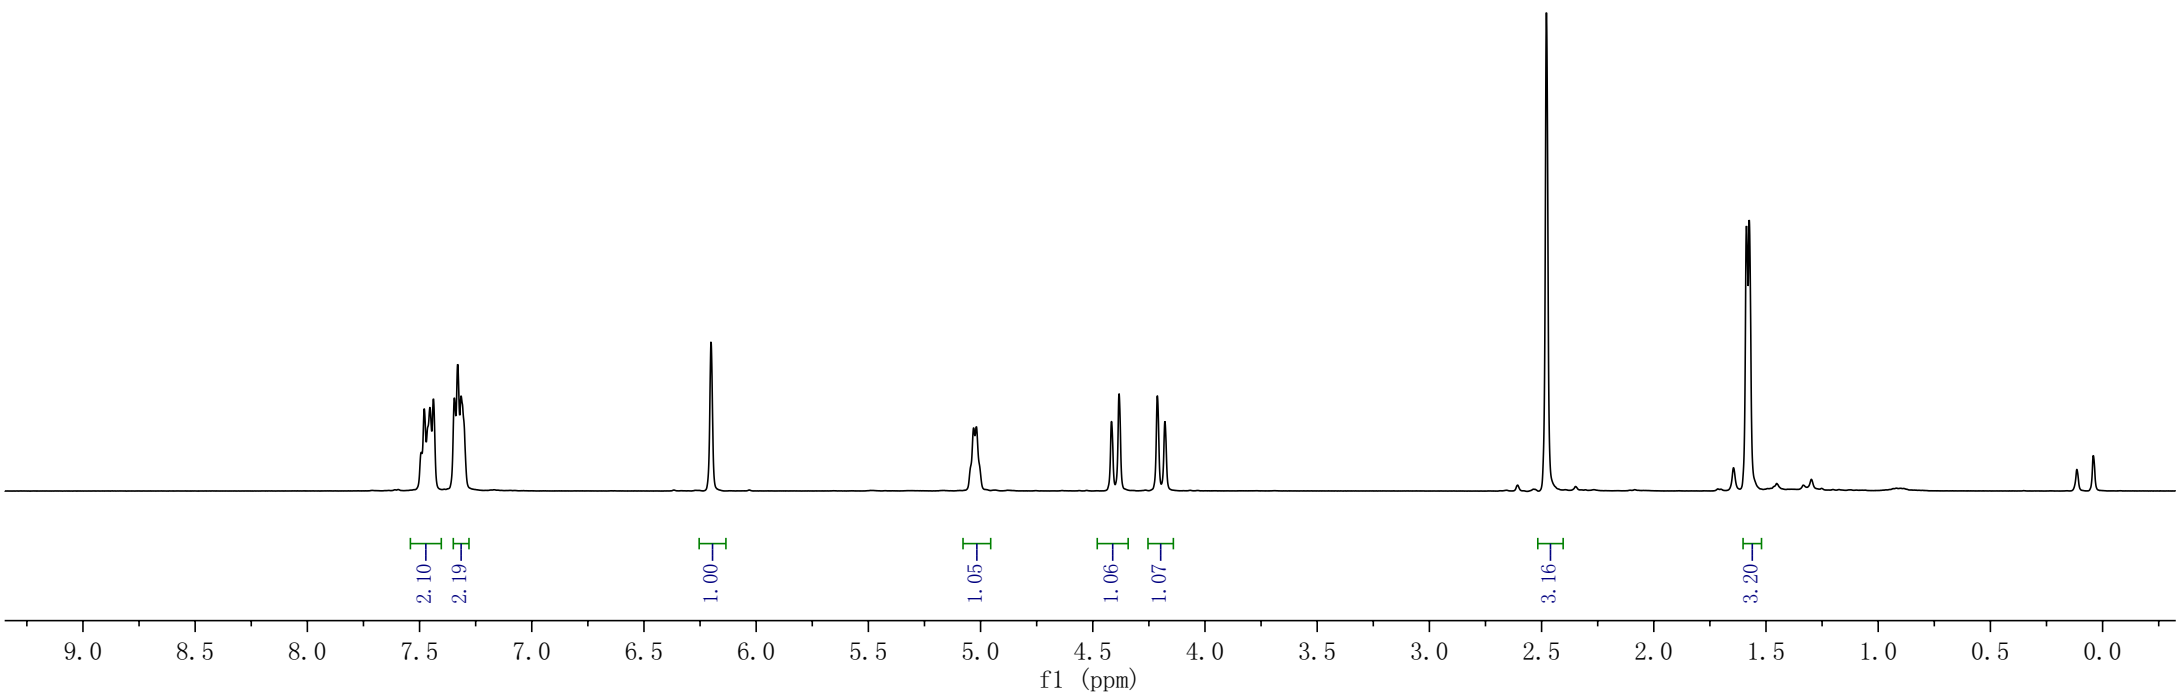

JKG-20150310-36P  
C13CPD CDC13 (QNP 101) 2015-1} ZHL 16

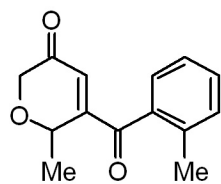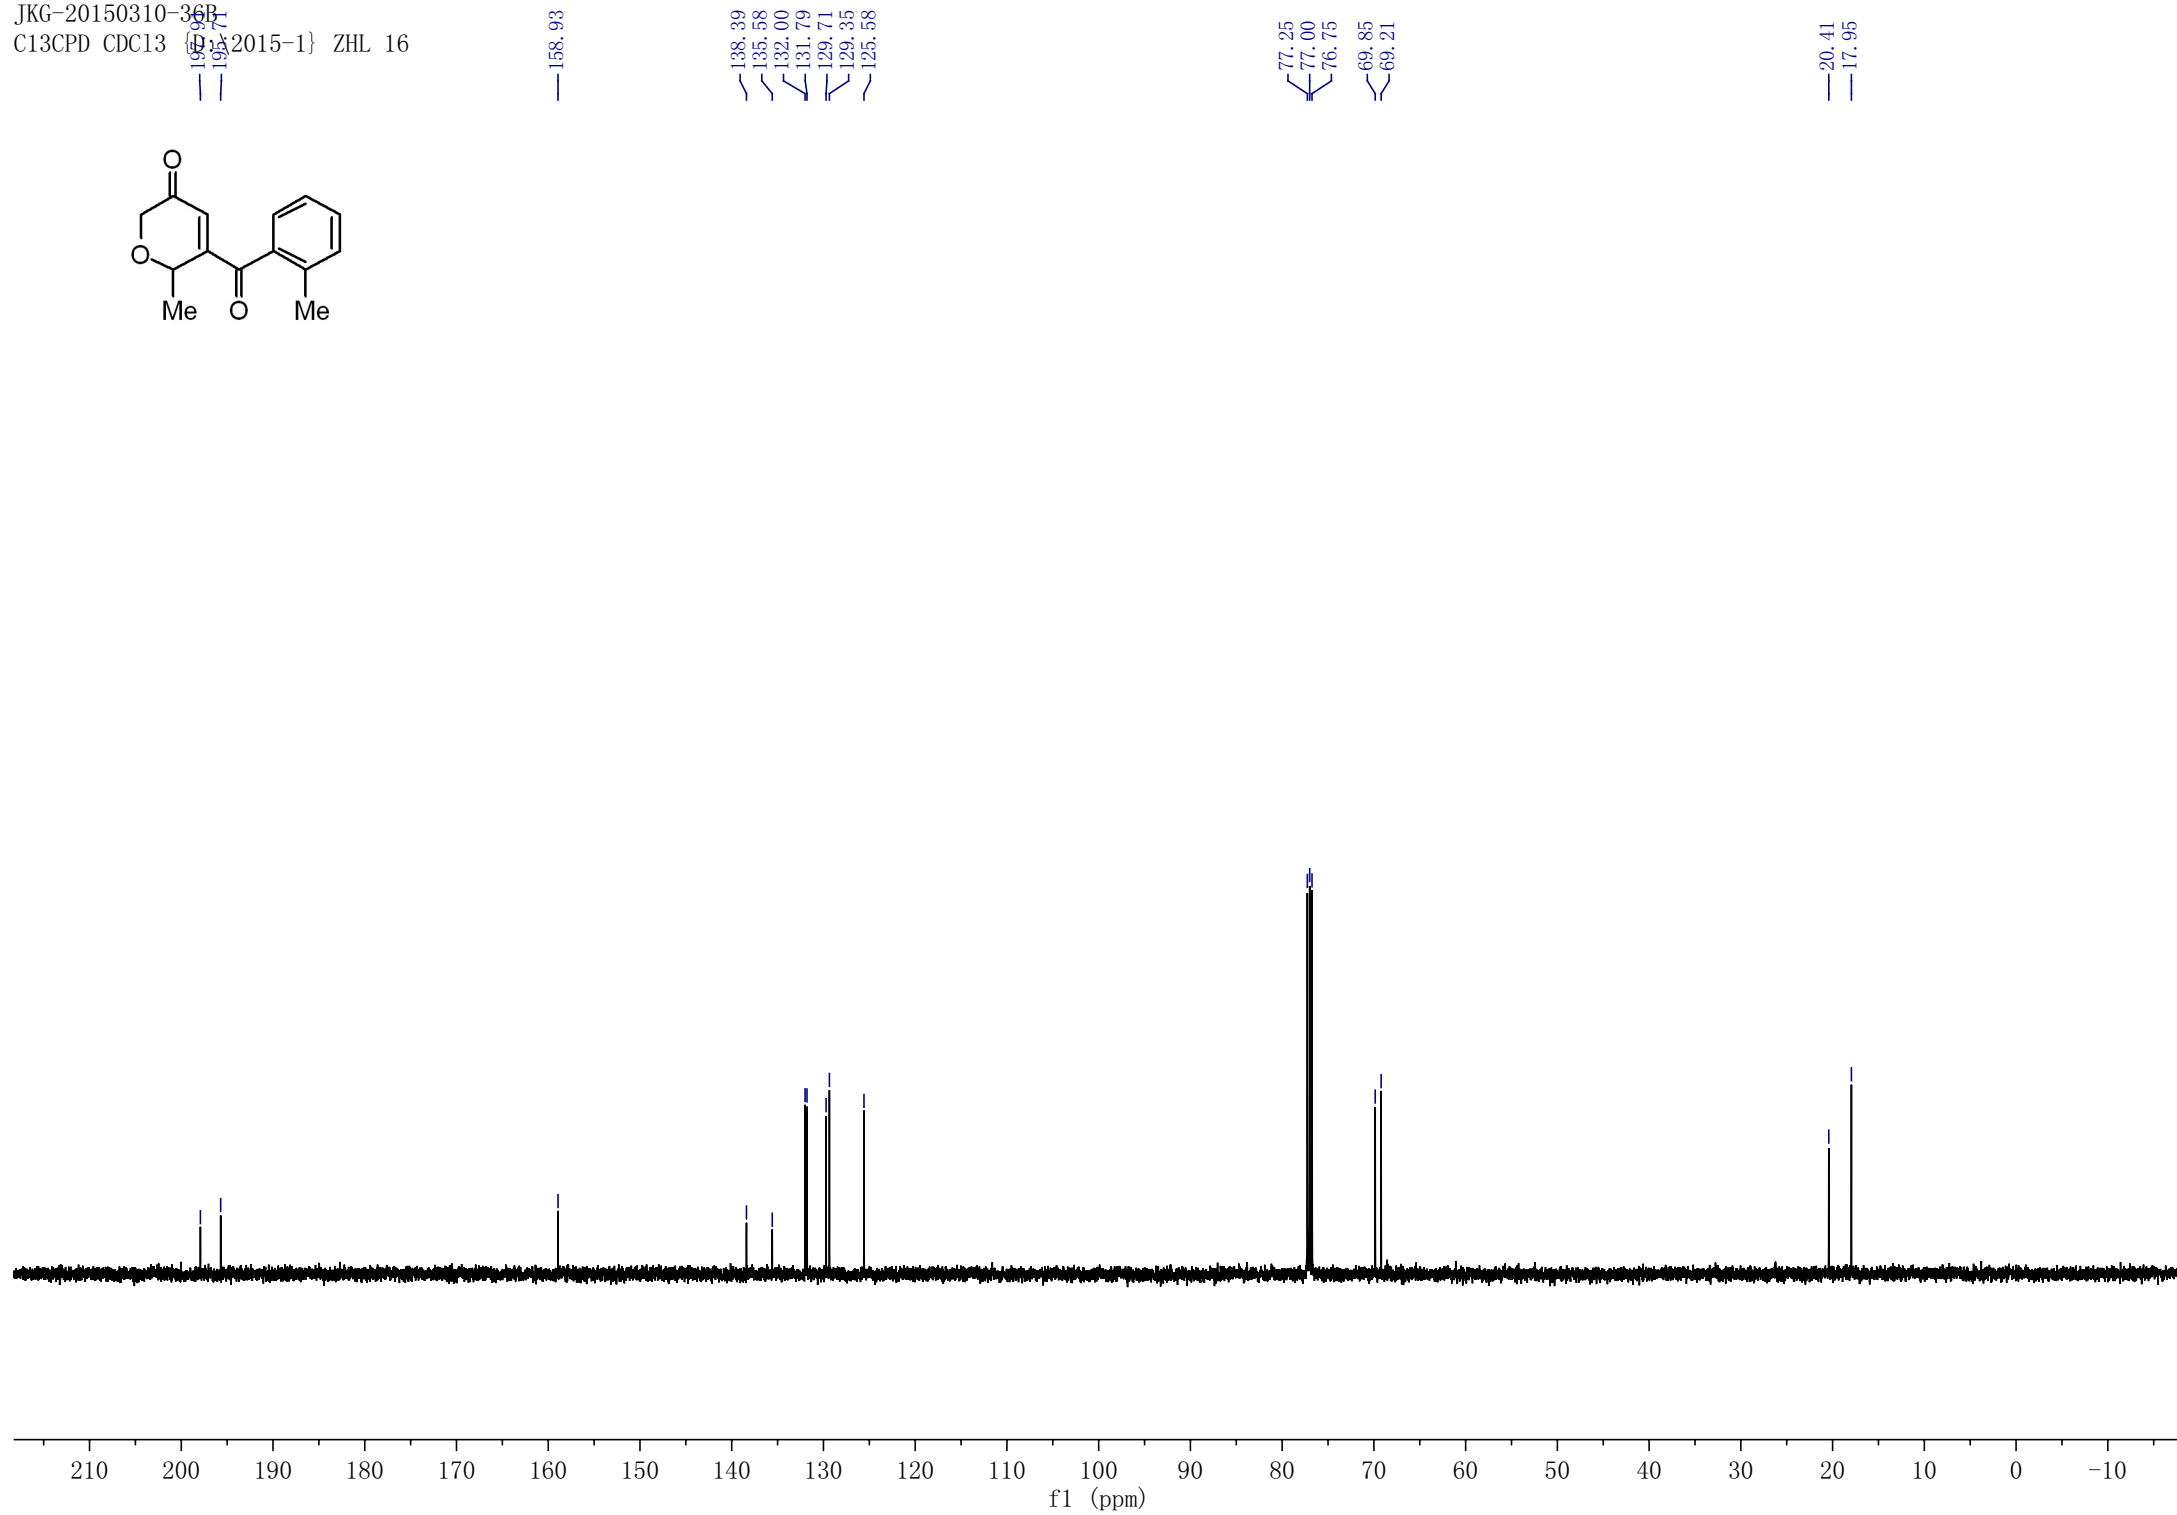

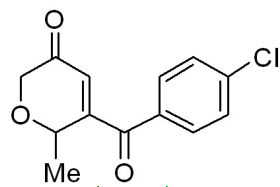

D (m)  
7.86

C (m)  
7.55

B (d)  
6.26

E (m)  
4.98

A (m)  
4.98

G (dd)  
4.22

F (d)  
4.42

H (d)  
1.48

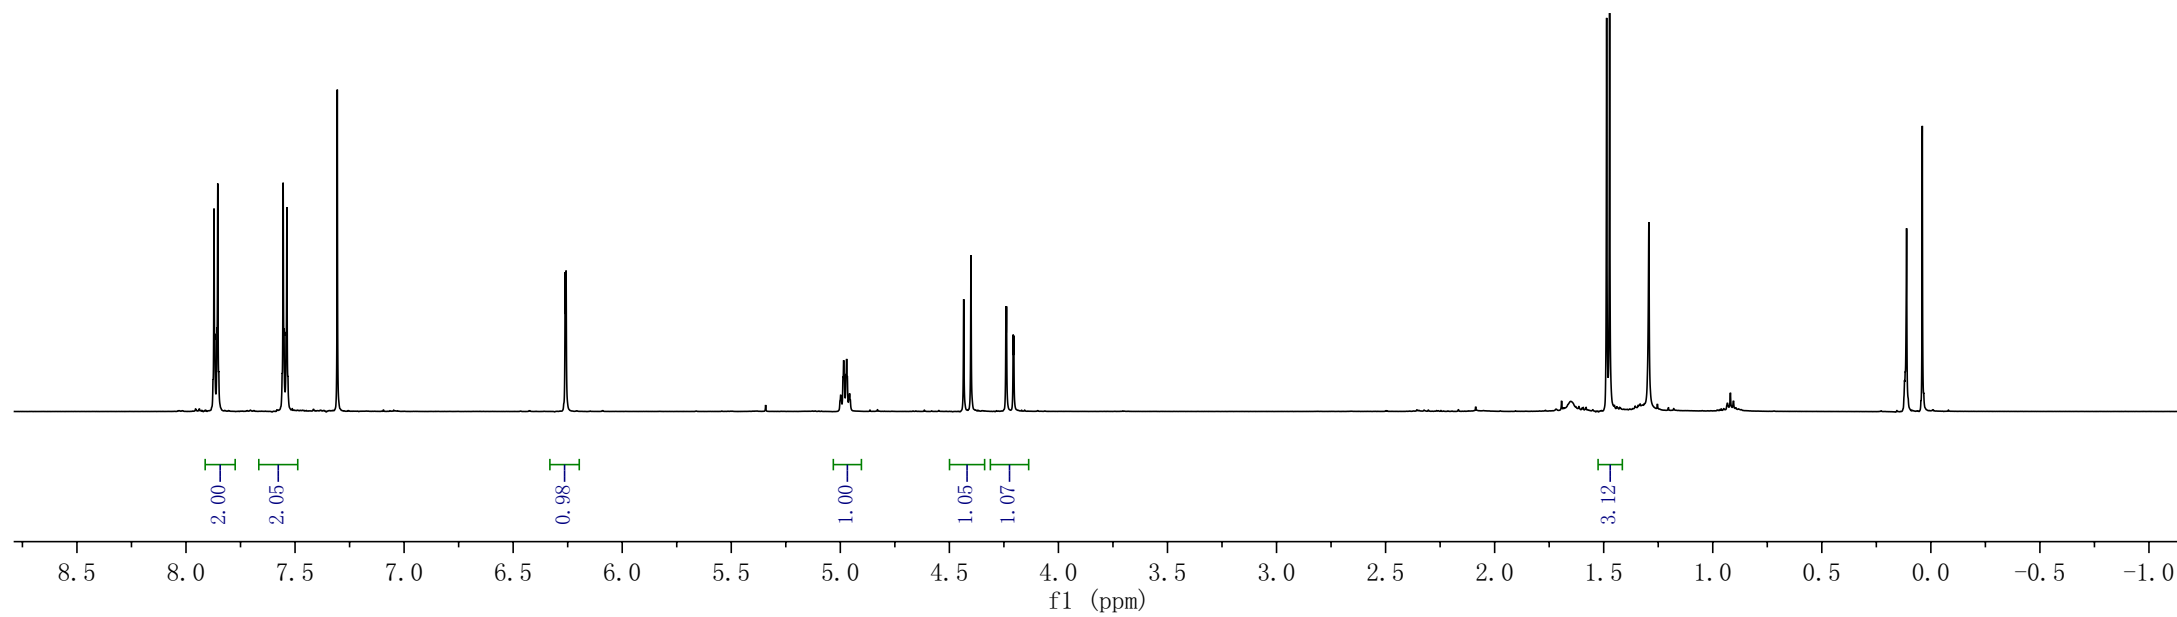

JKG-20150311-I-36B  
C13CPD CDC13 {D:2015-1} ZHL 15

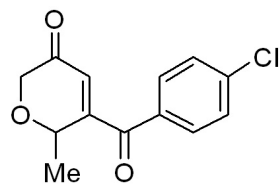

194.88  
194.80

158.36

141.03

133.37

131.03

129.33

127.43

70.58  
70.17

18.13

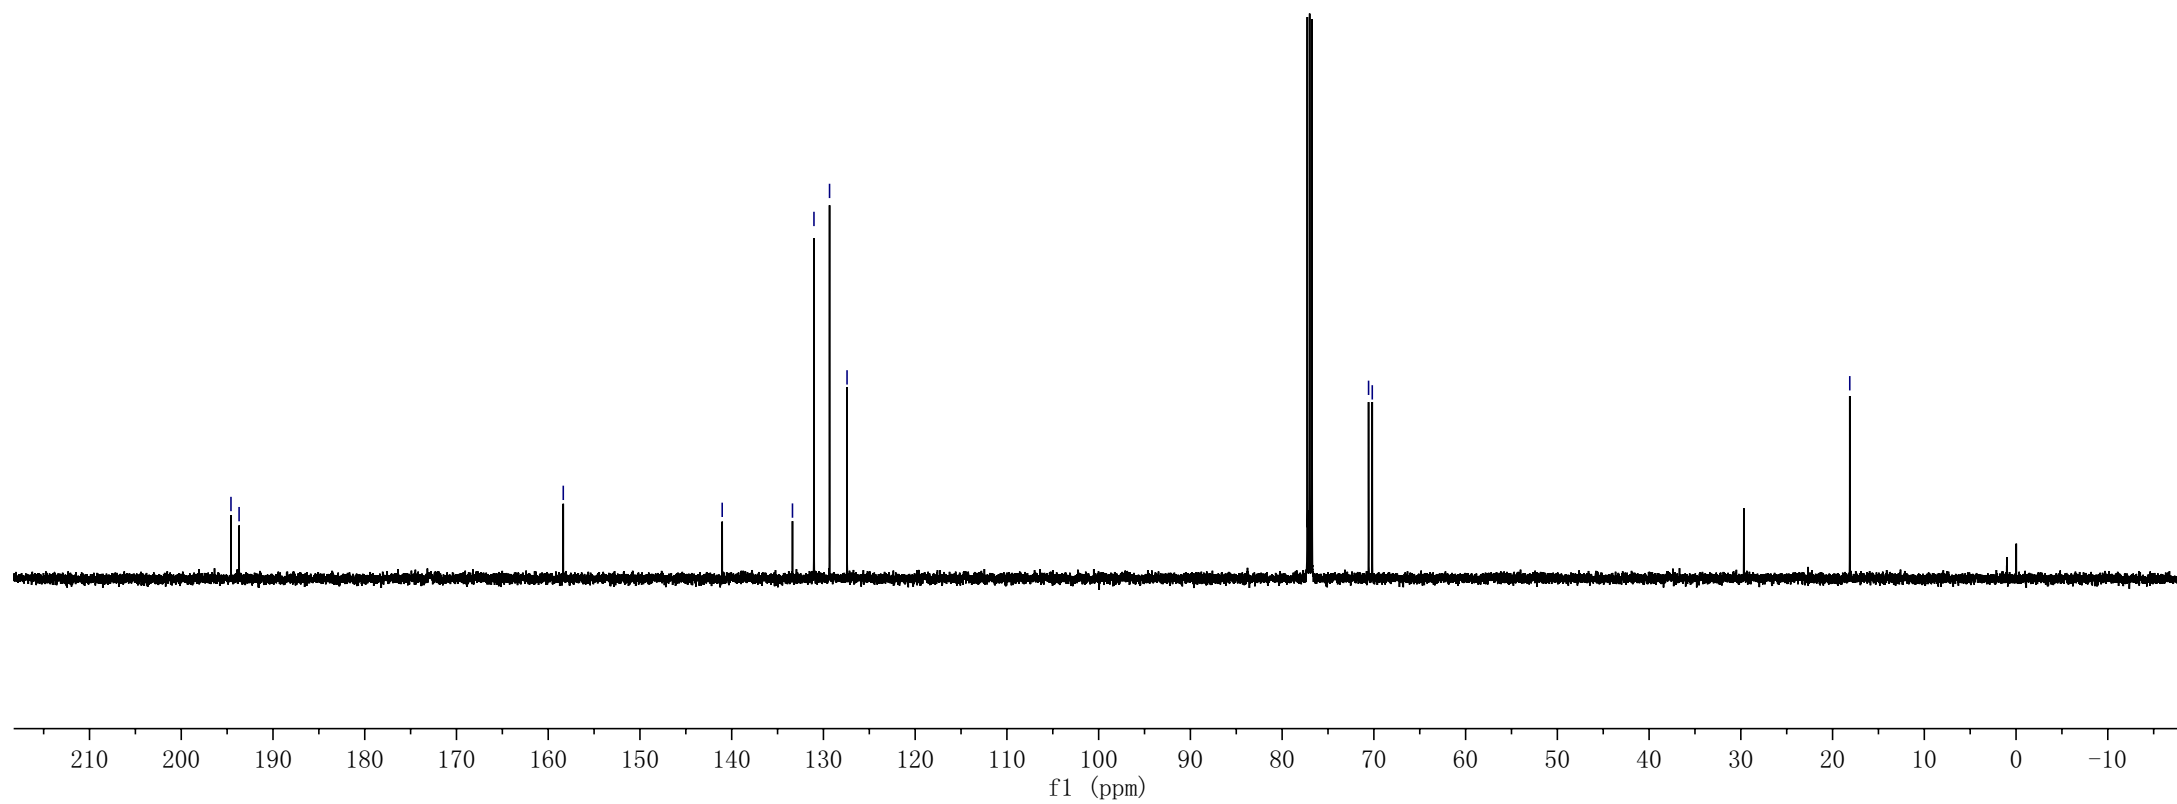

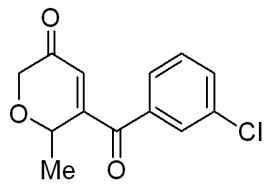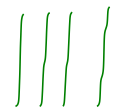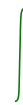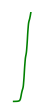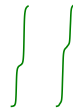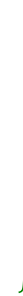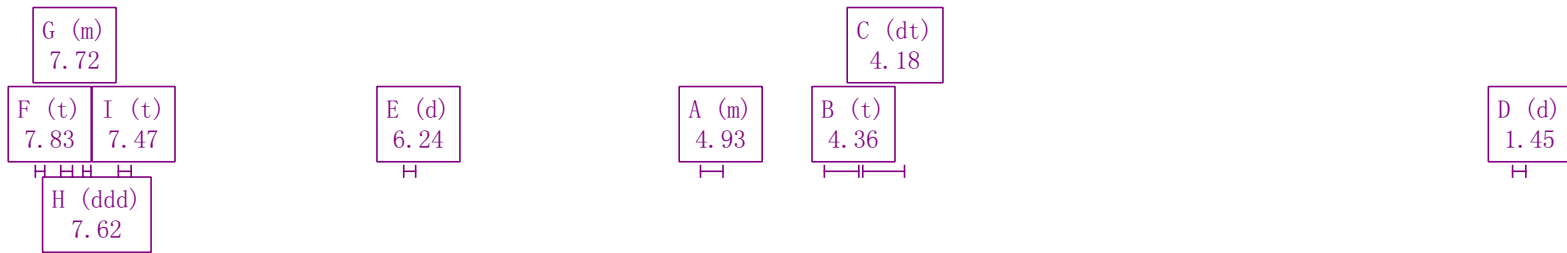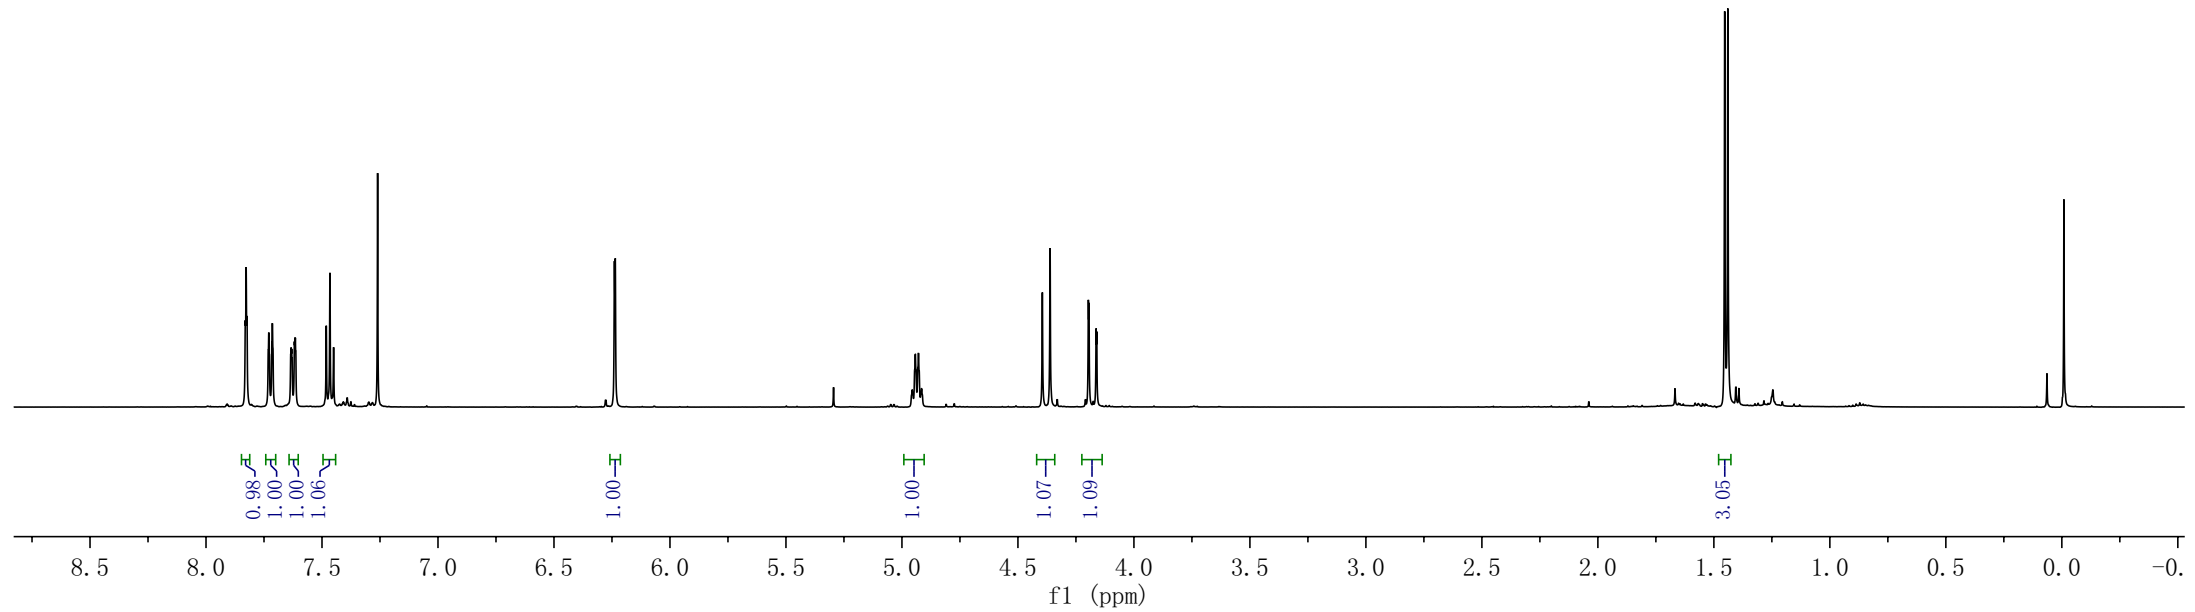

194.63  
192.67

158.01

136.66  
135.36  
134.16  
130.22  
129.43  
127.86  
127.80

77.25  
77.00  
76.75  
70.49  
70.09

18.12

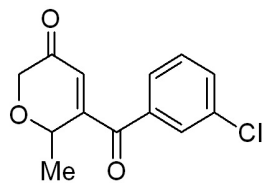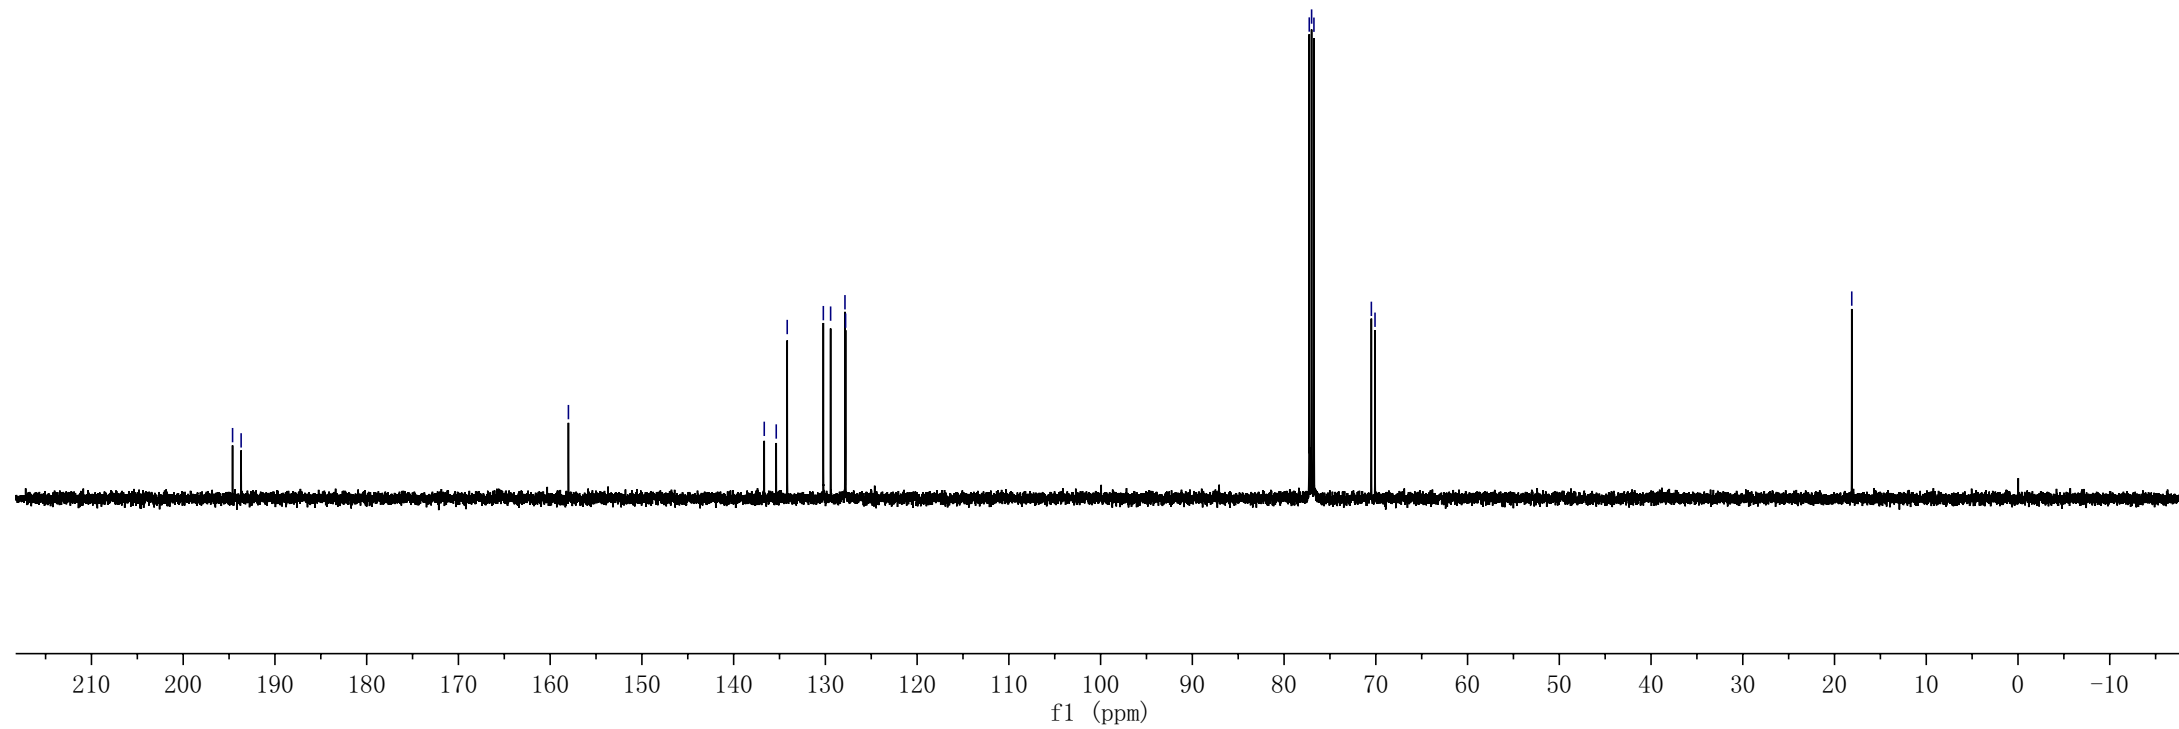



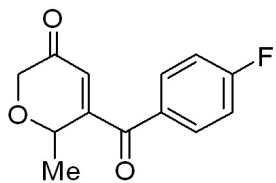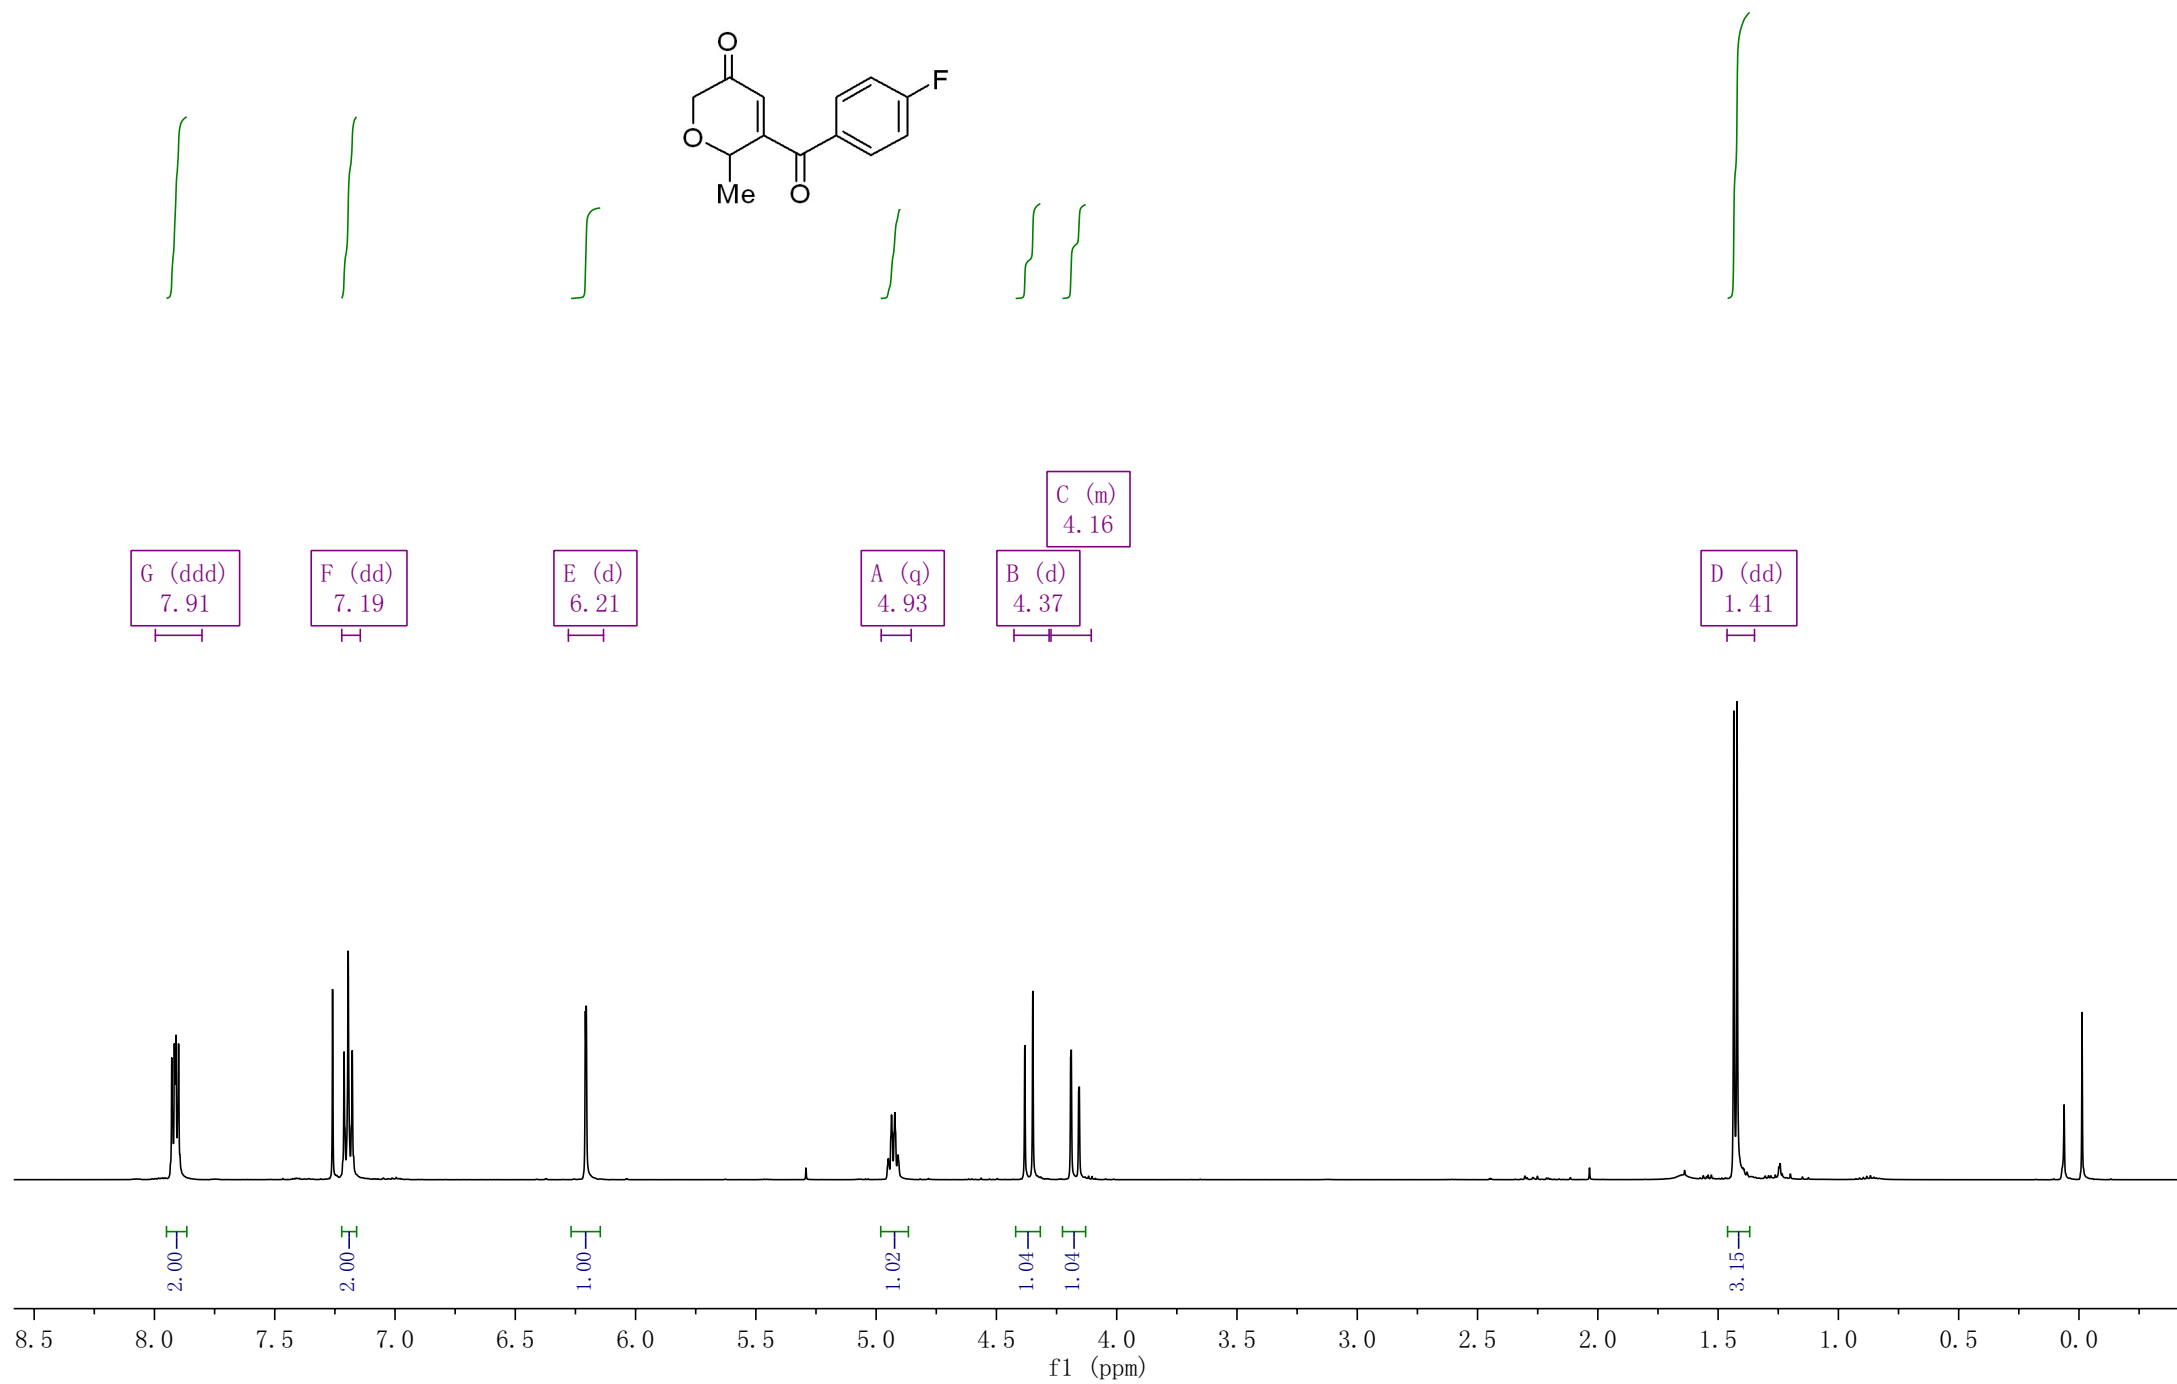

JKG-20150311-I-38B  
C13CPD CDC13 {D:\2015-1} ZHL 12

194.88  
194.82

167.46  
165.41

158.62

132.50  
132.43  
131.46  
131.43  
127.19

116.34  
116.17

70.63  
70.22

18.12

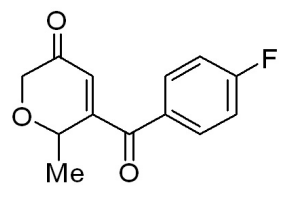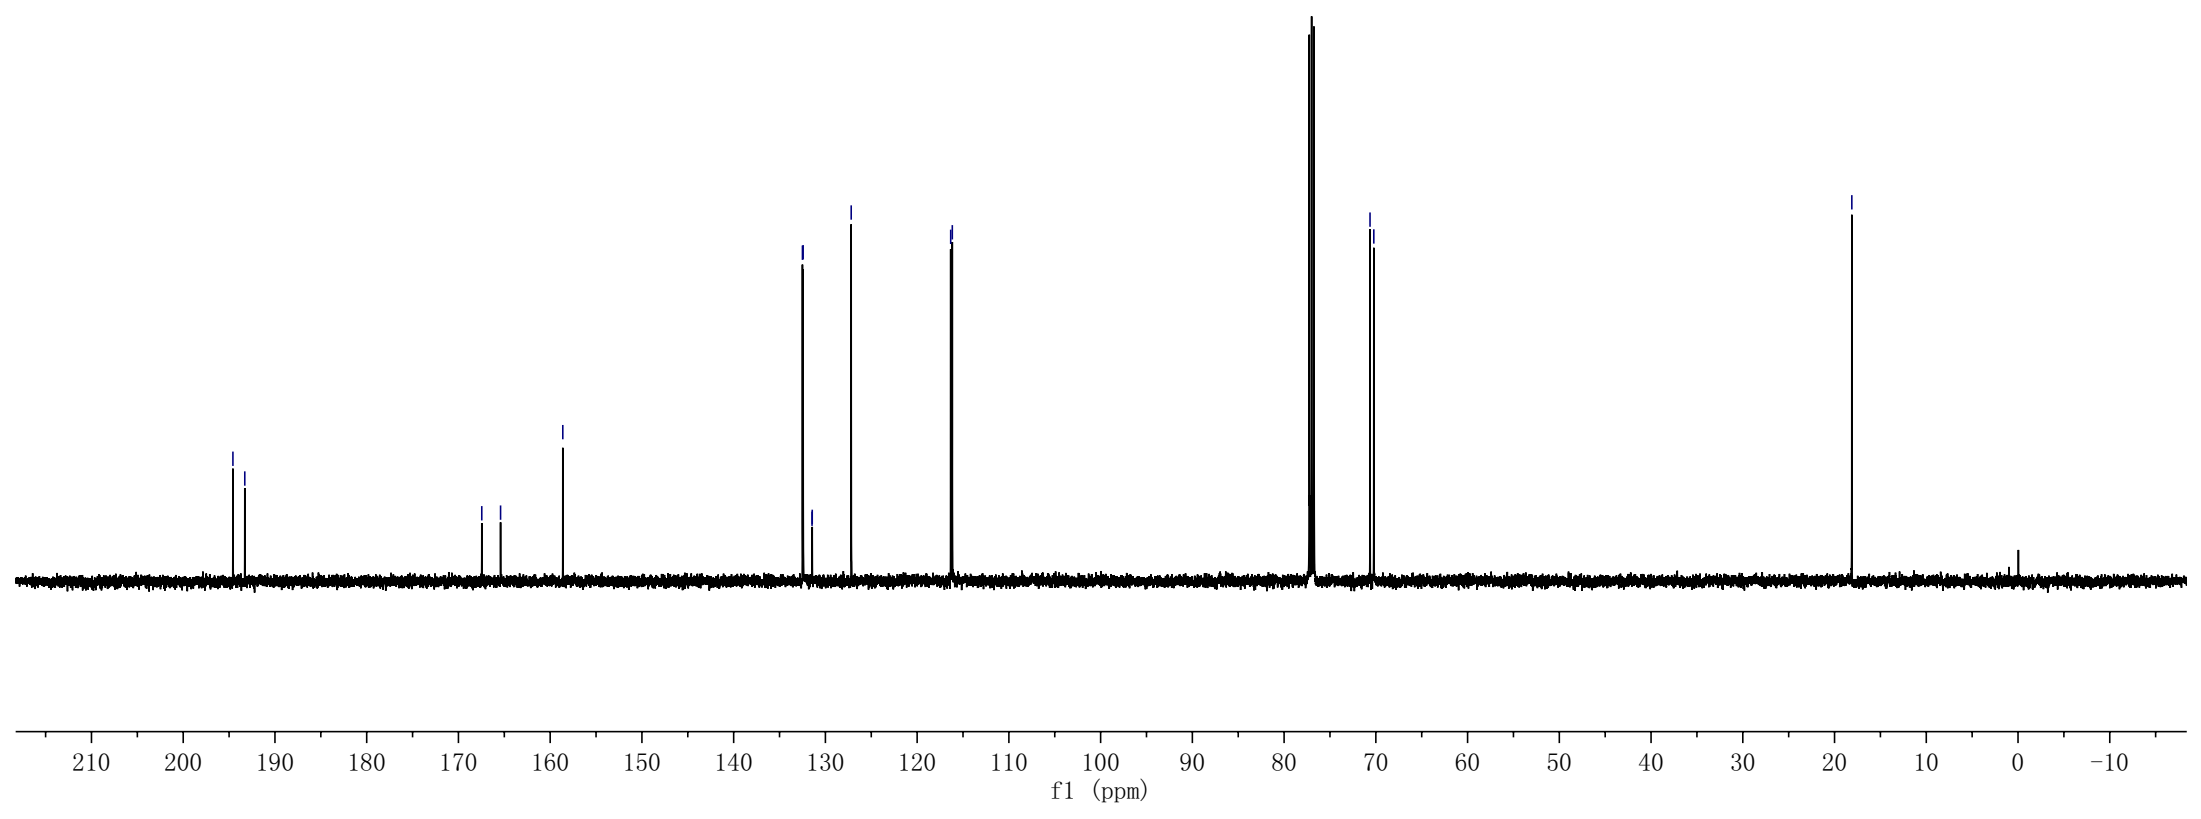

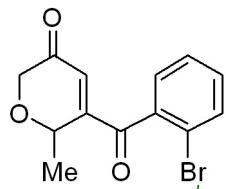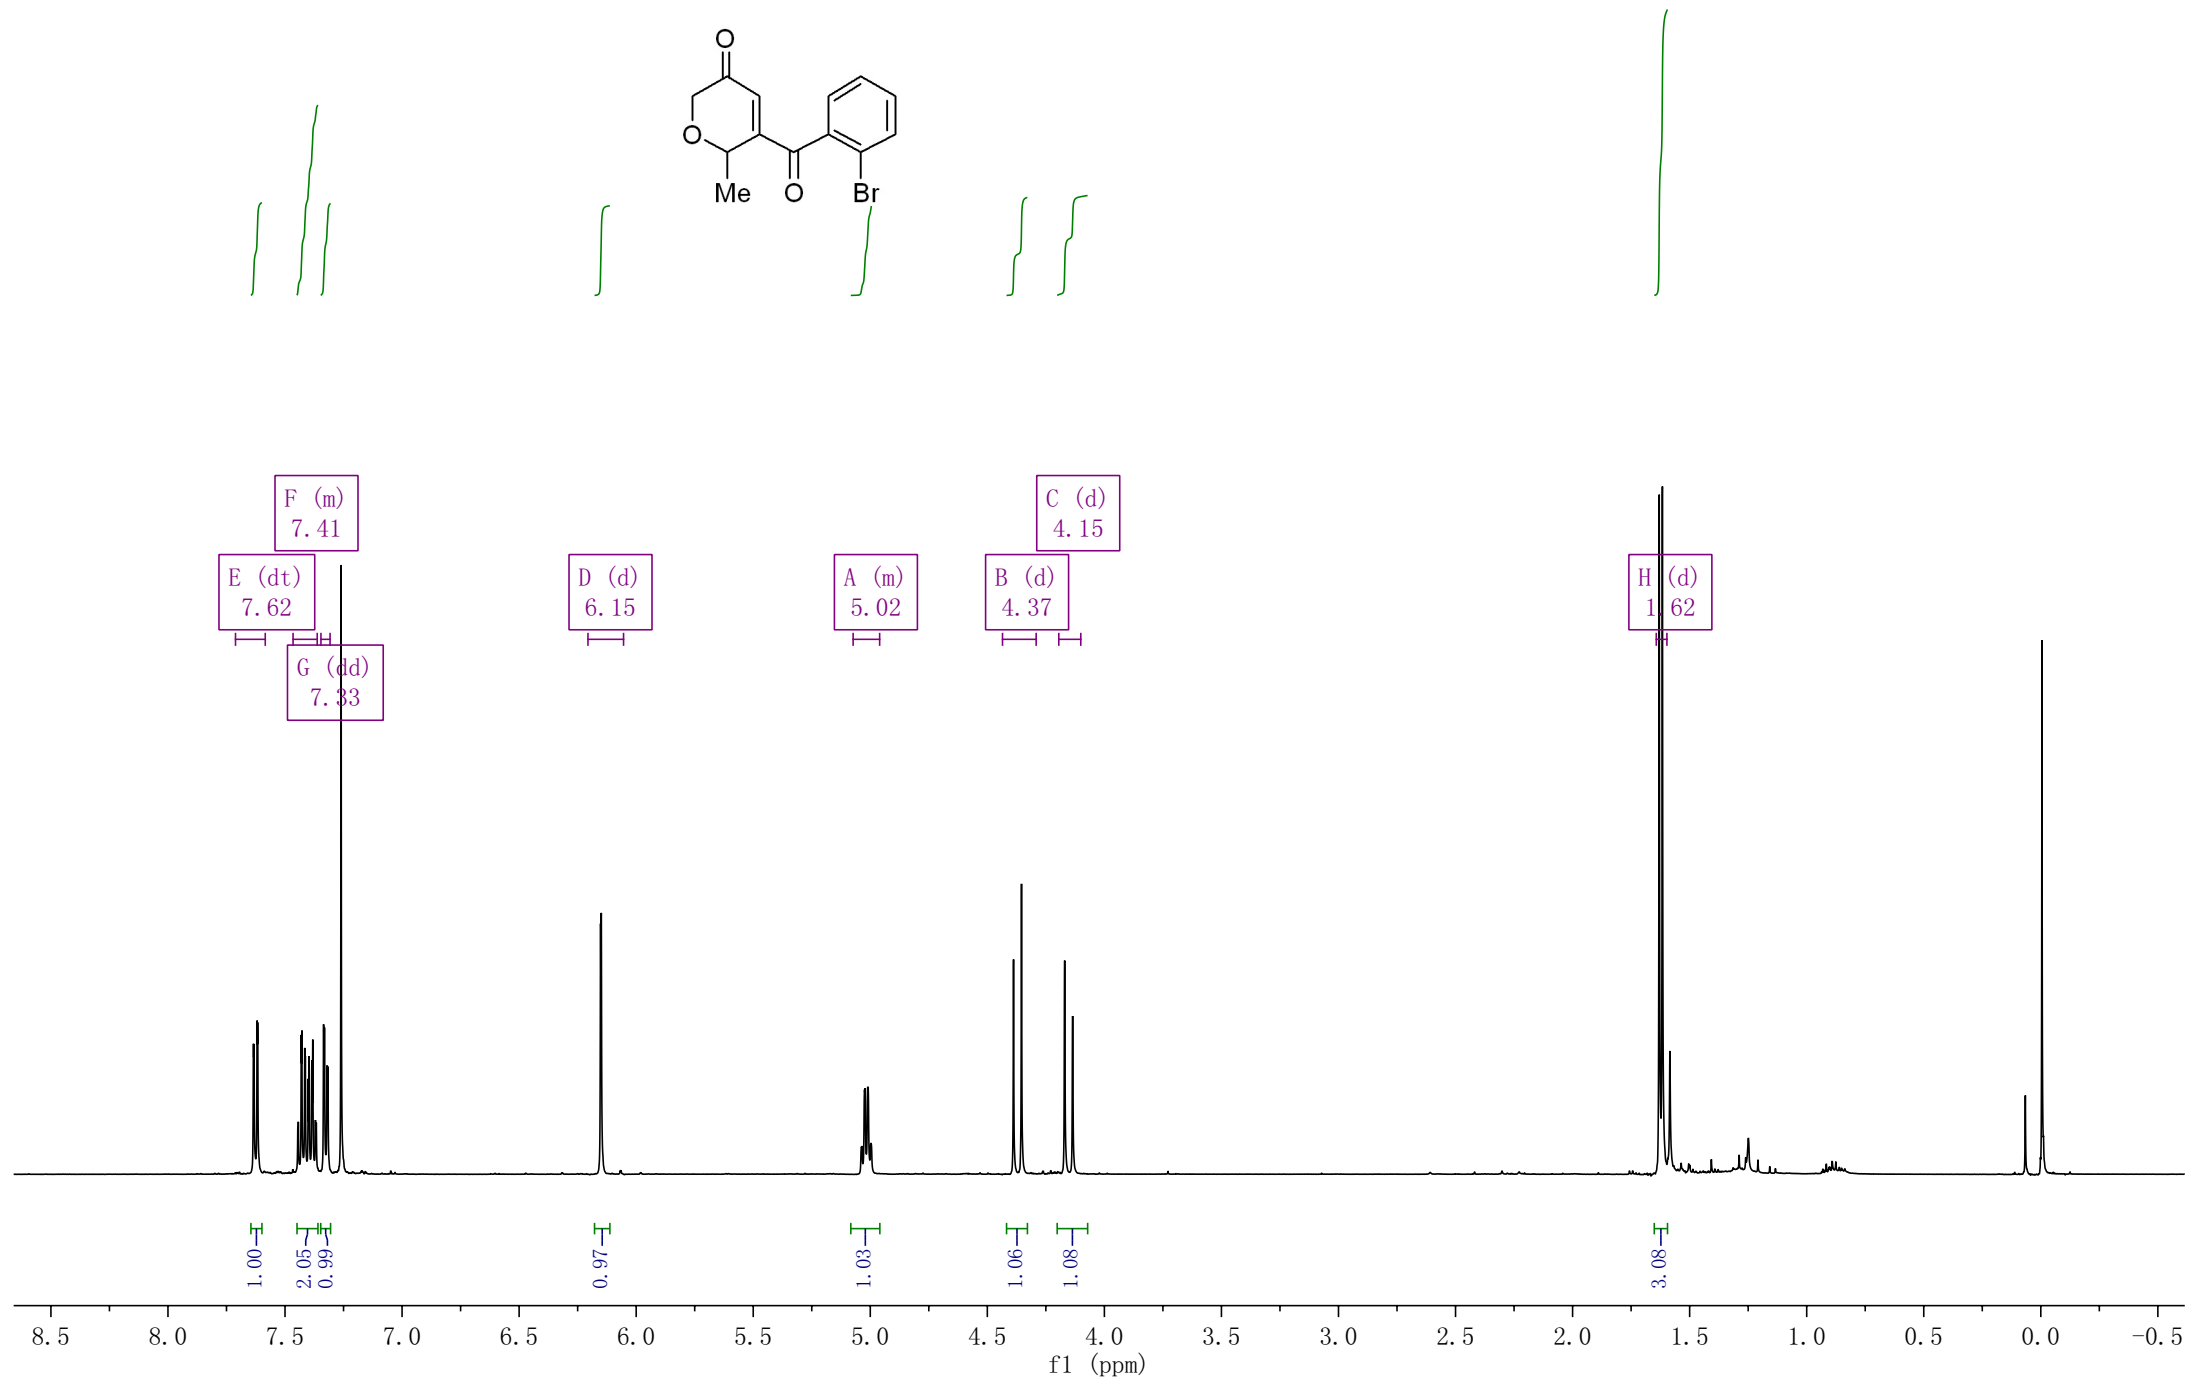

196.34  
194.66

156.49

138.35  
133.51  
132.35  
130.94  
129.44  
127.55

119.61

69.24  
68.34

17.73

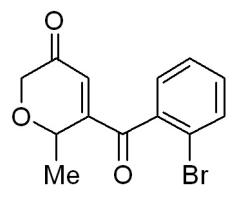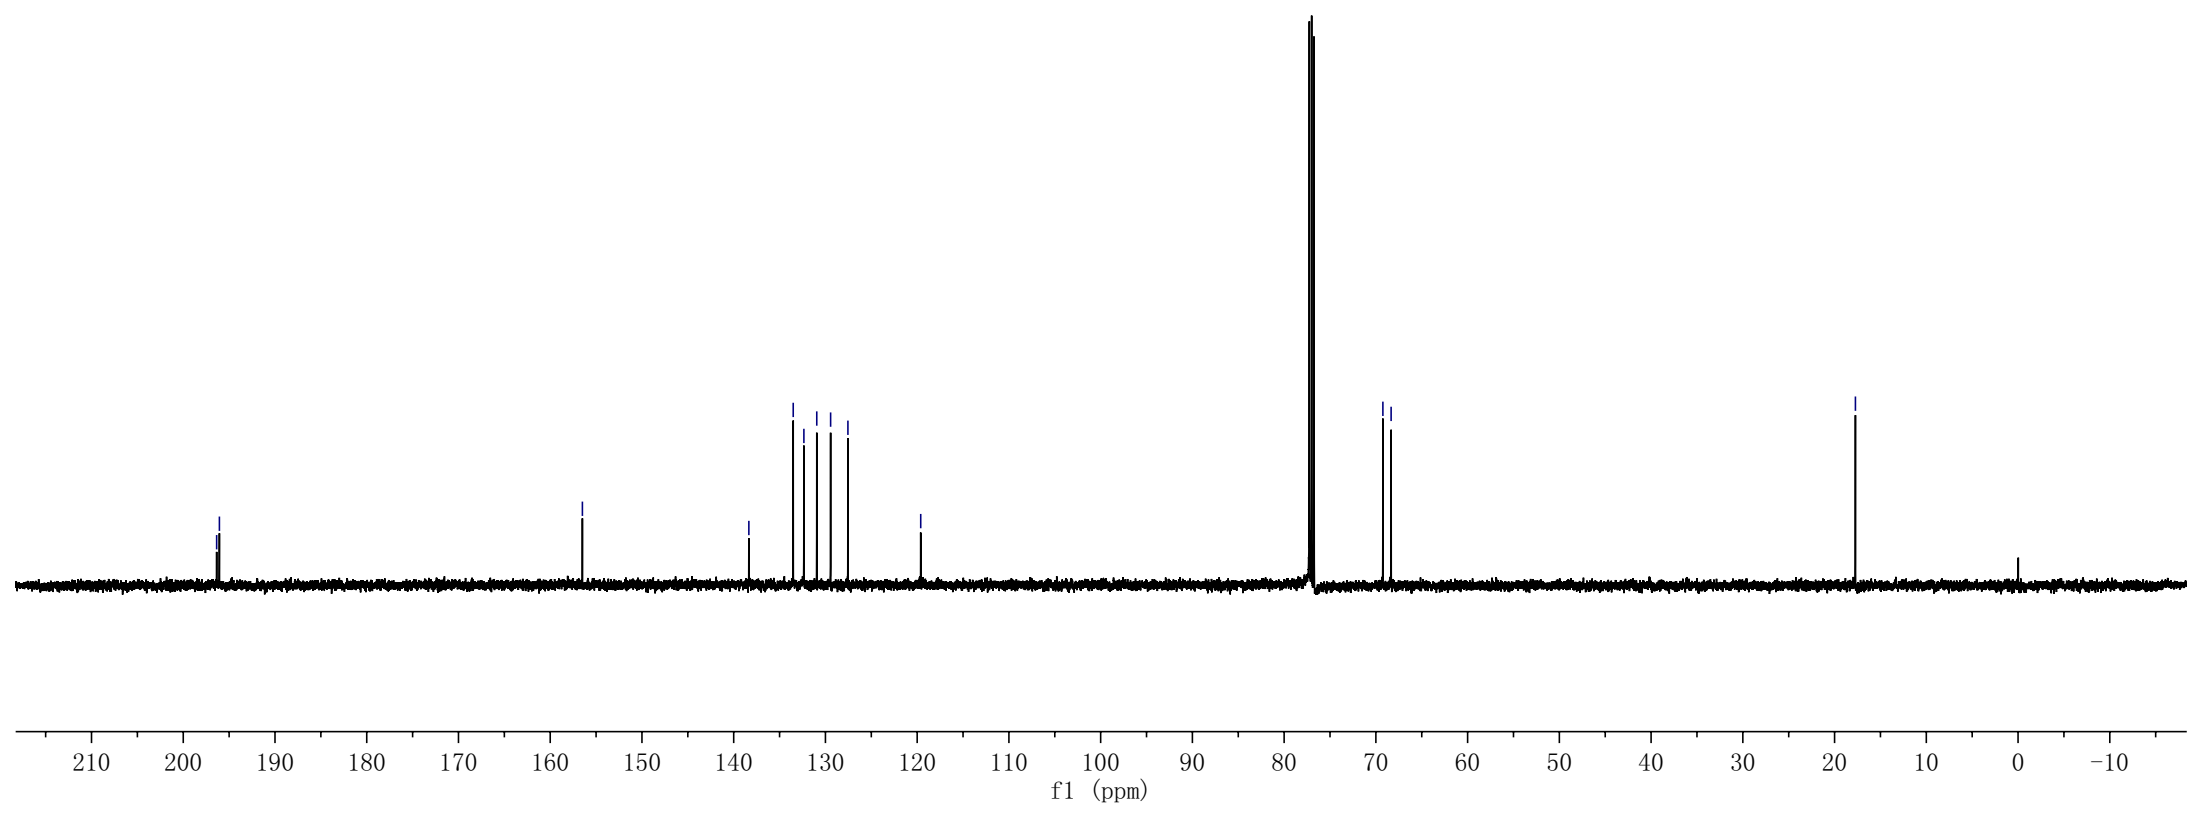

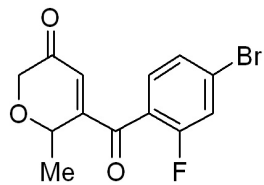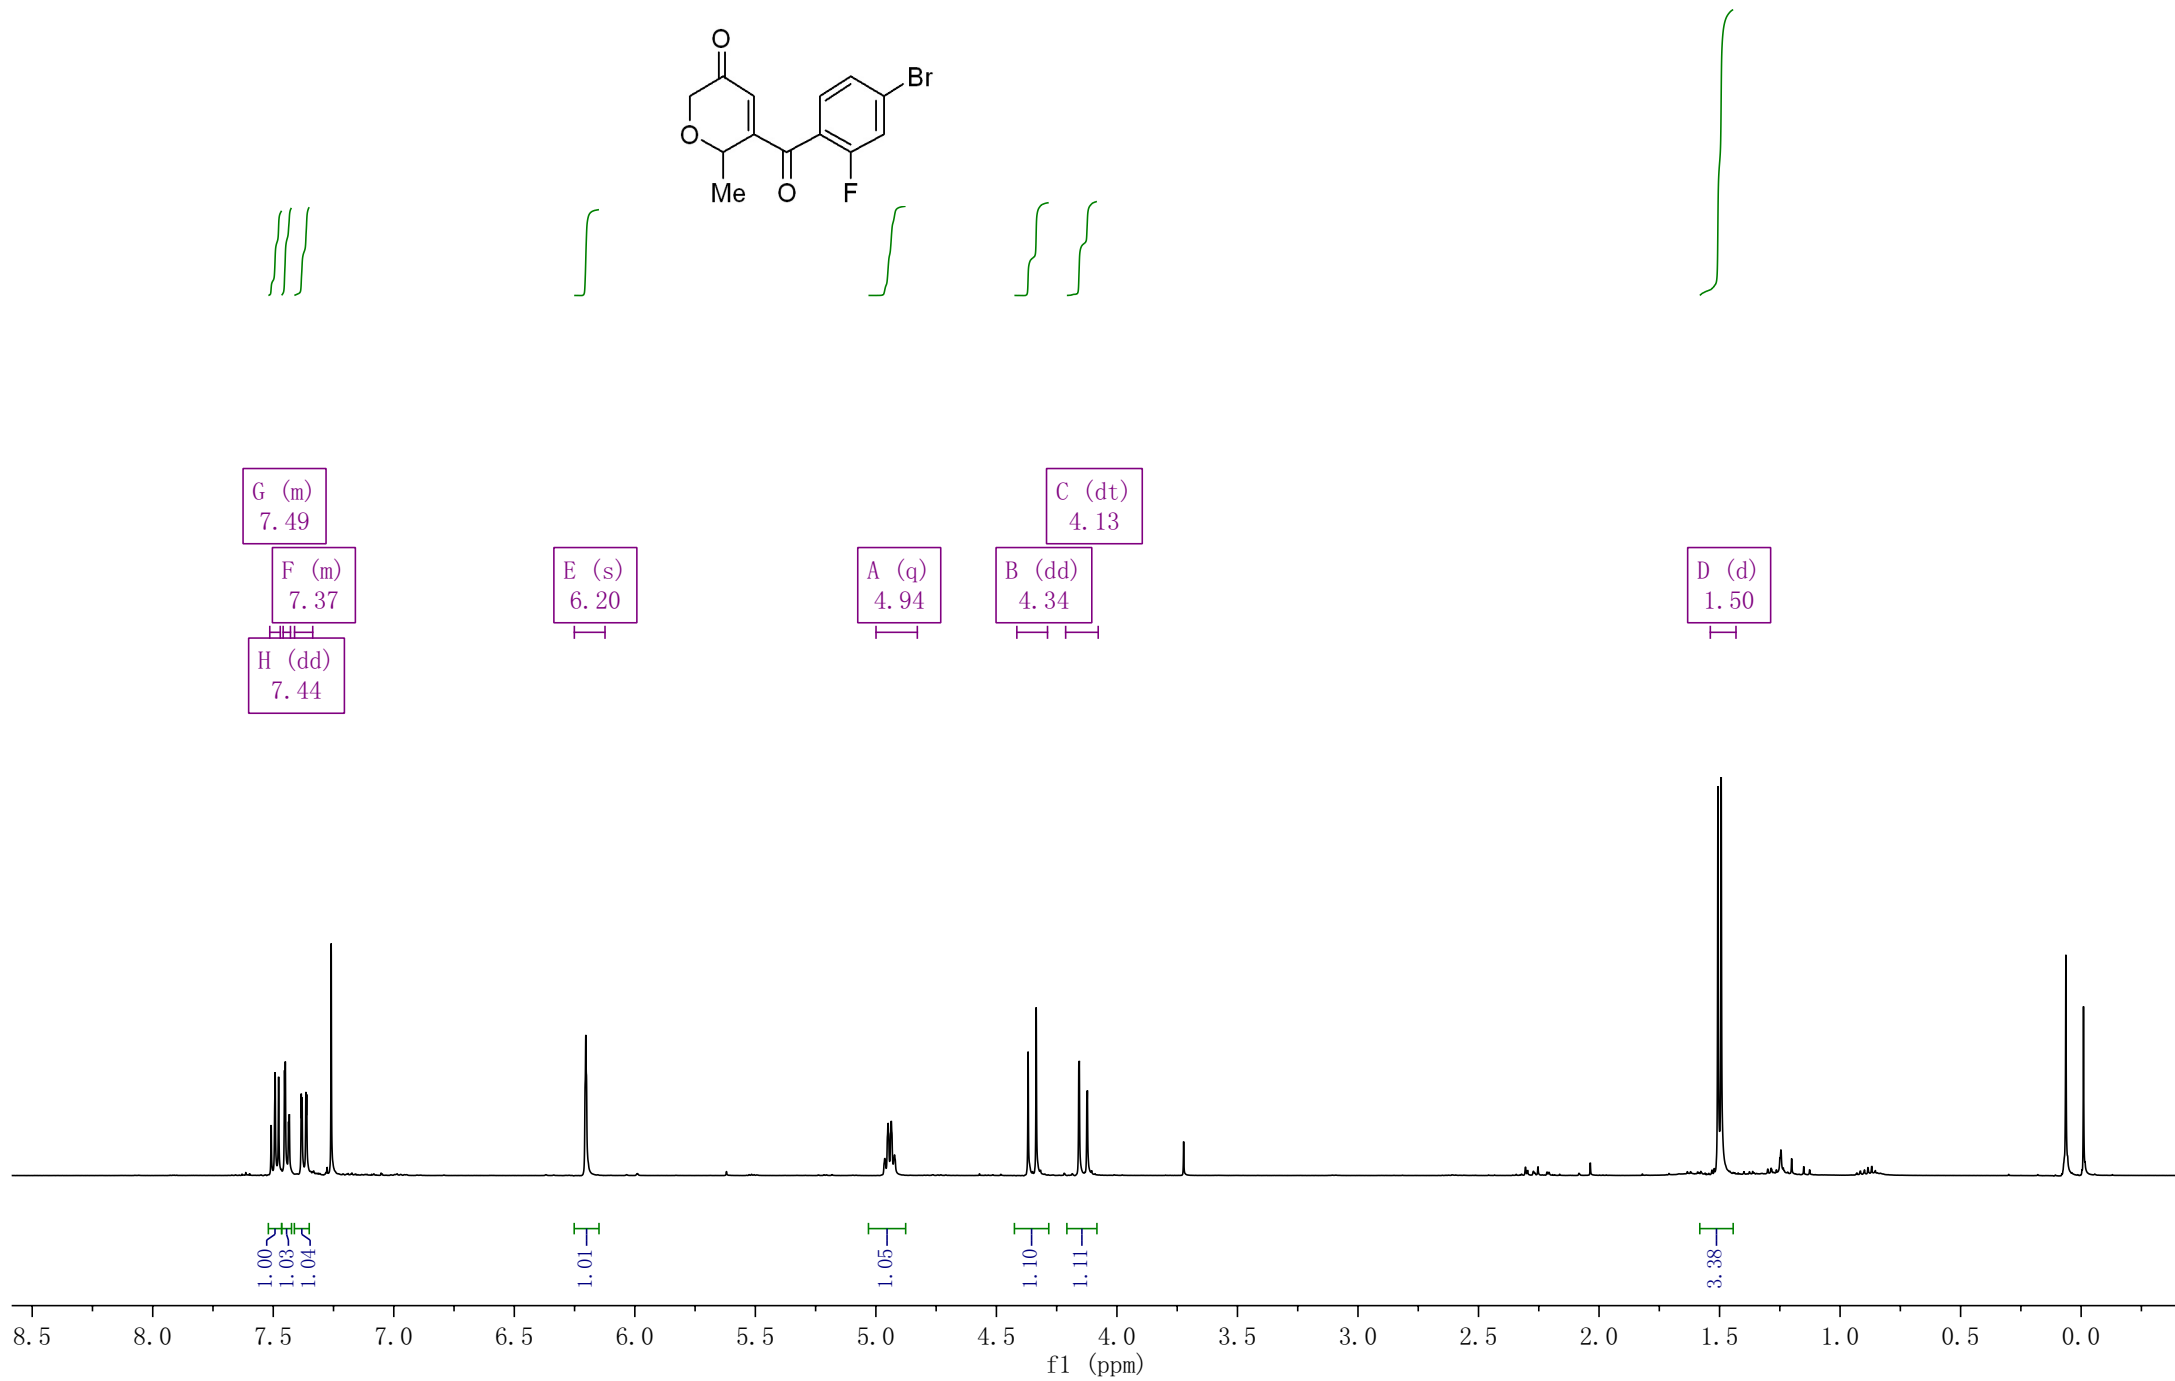

JKG-20150311-I-48A  
C13CPD CDC13 {D:2015-1} ZHL 10

195.26  
194.32

161.39  
159.32  
158.43

131.77  
131.75  
128.66  
128.58  
128.42  
128.39  
128.21  
128.18  
123.80  
123.70  
120.53  
120.33

69.78  
69.33

17.98

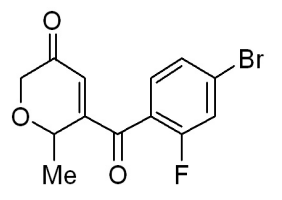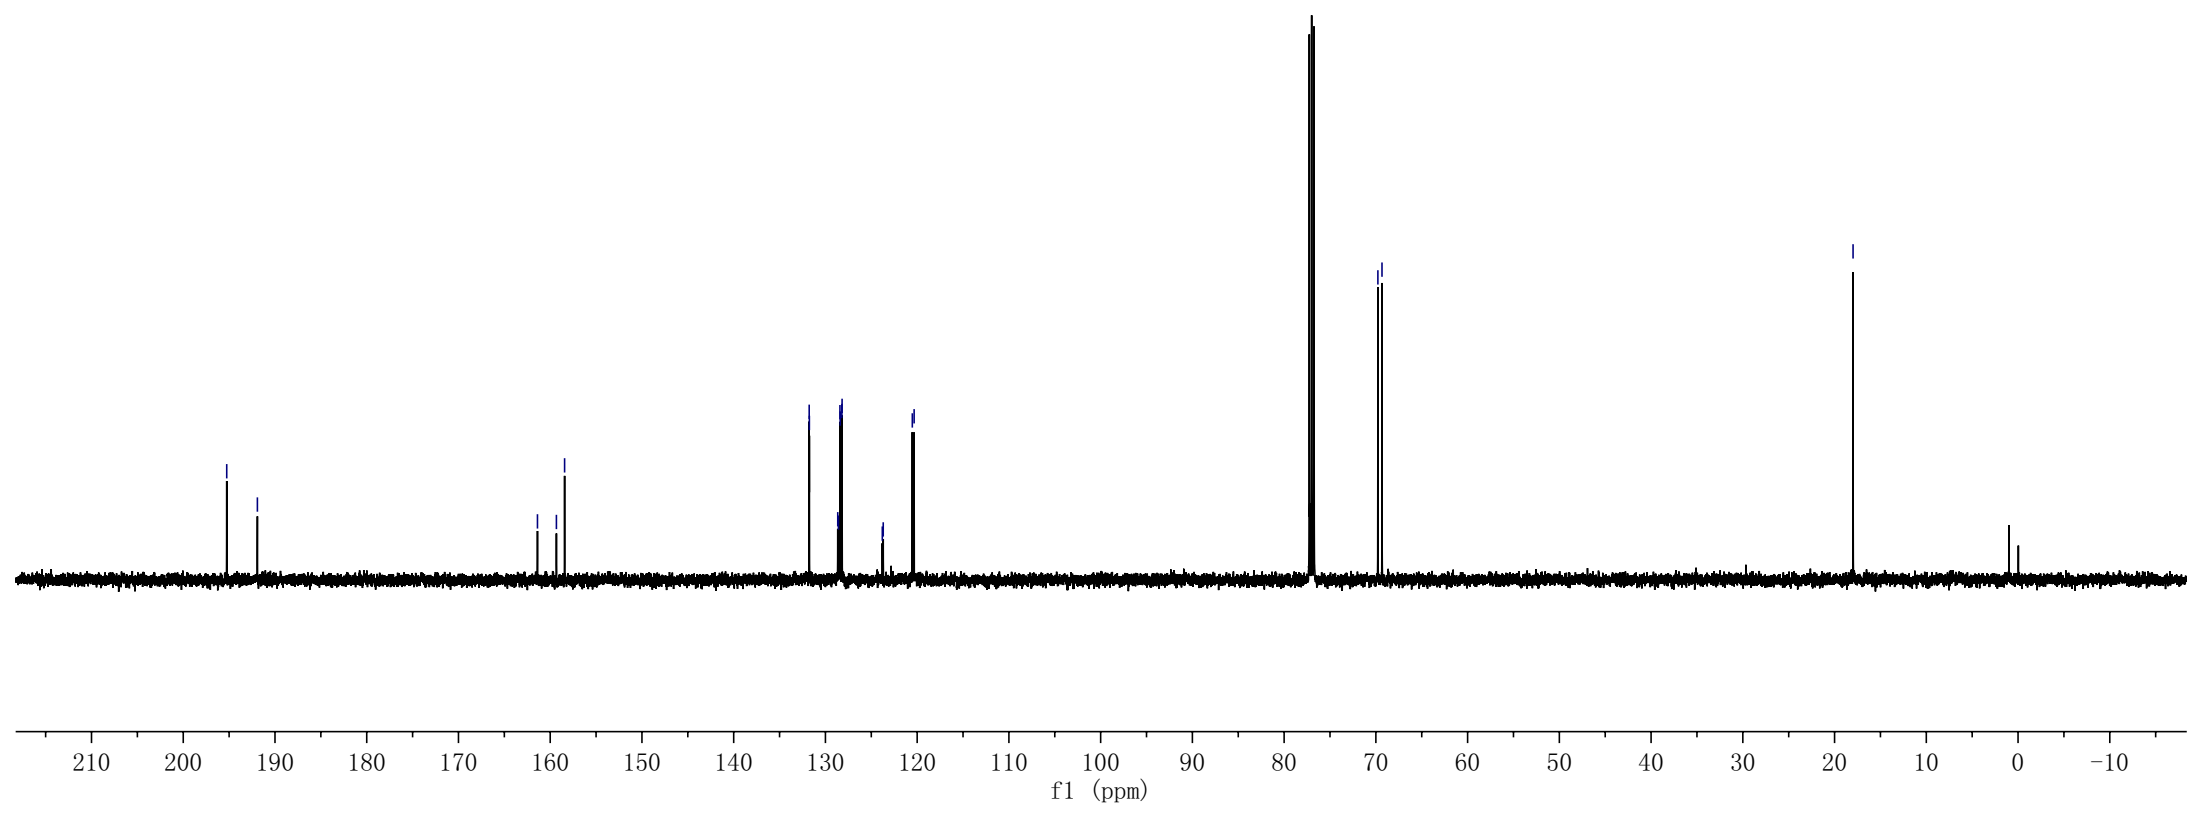

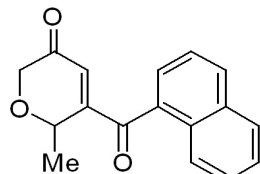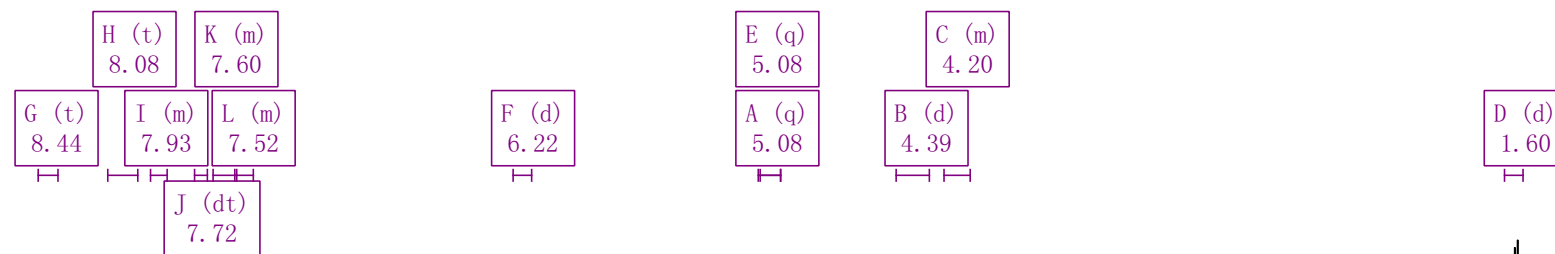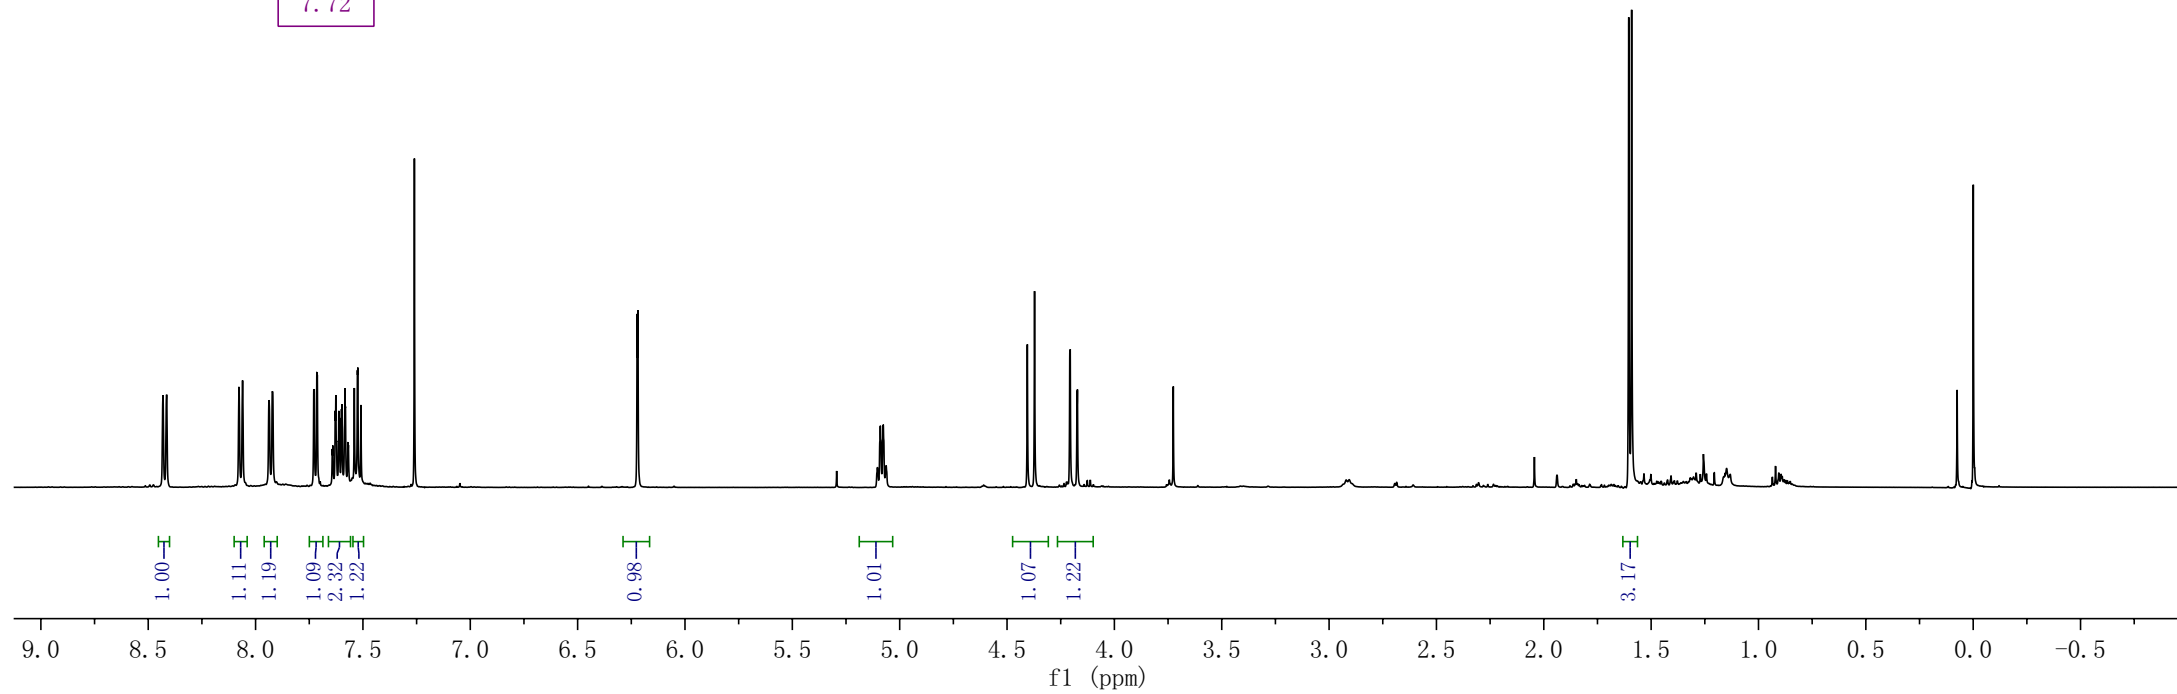

197.90  
196.84

159.71

133.90  
133.75  
132.98  
130.70  
130.27  
129.32  
128.67  
128.40  
126.96  
125.13  
124.13

77.25  
77.00  
76.75  
70.16  
69.45

18.08

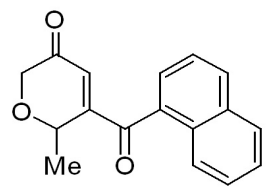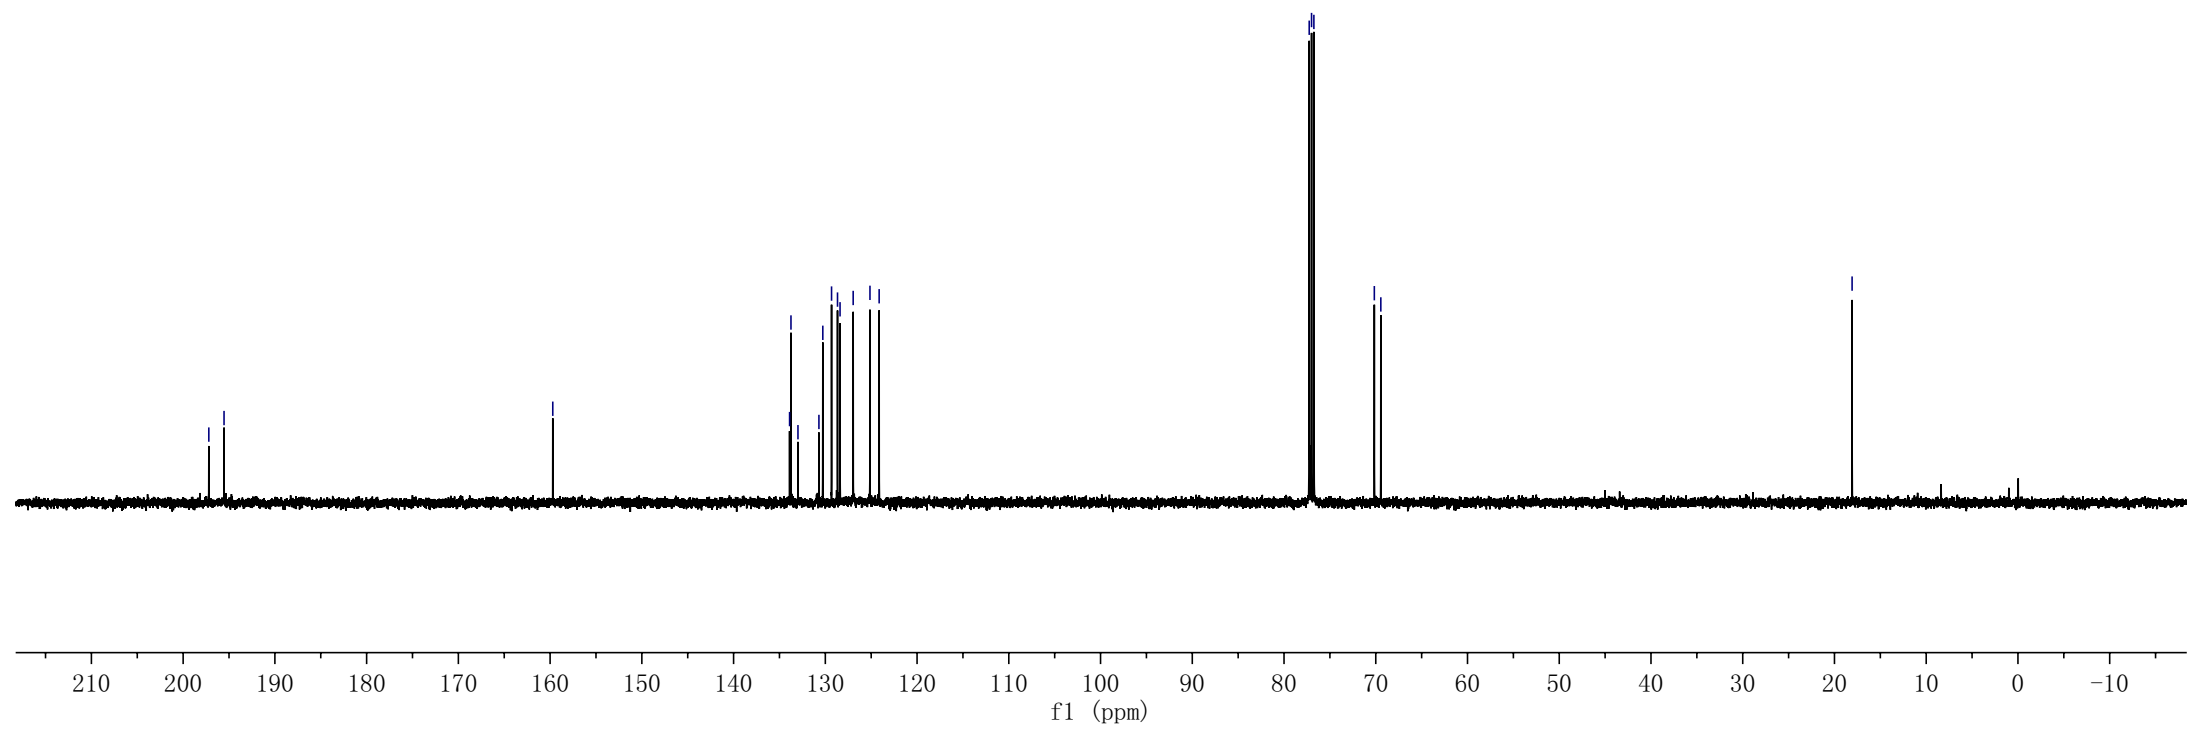



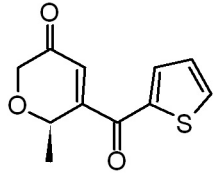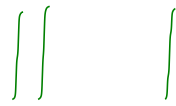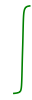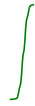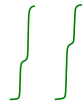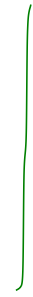

A (m)  
7.83

C (m)  
7.21

D (d)  
6.40

E (q)  
4.92

F (d)  
4.36

G (dd)  
4.17

H (d)  
1.44

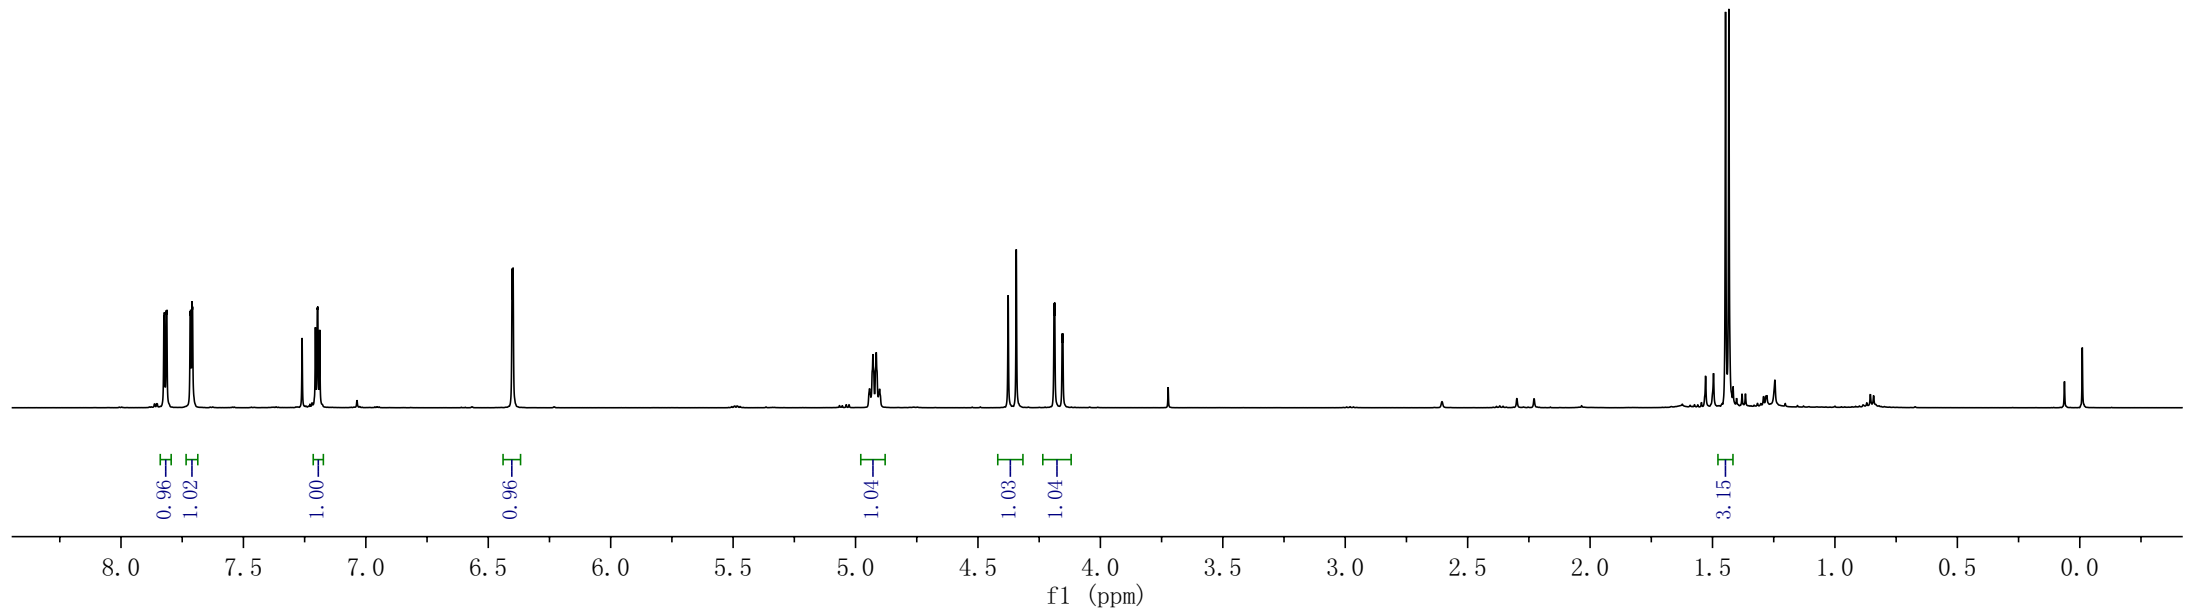

JKG-20141229-J-45A

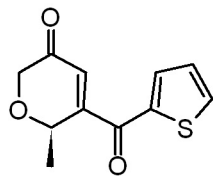

194.75

186.28

158.88

142.06

136.60

135.32

128.61

126.48

77.25

77.00

76.75

70.59

70.16

18.16

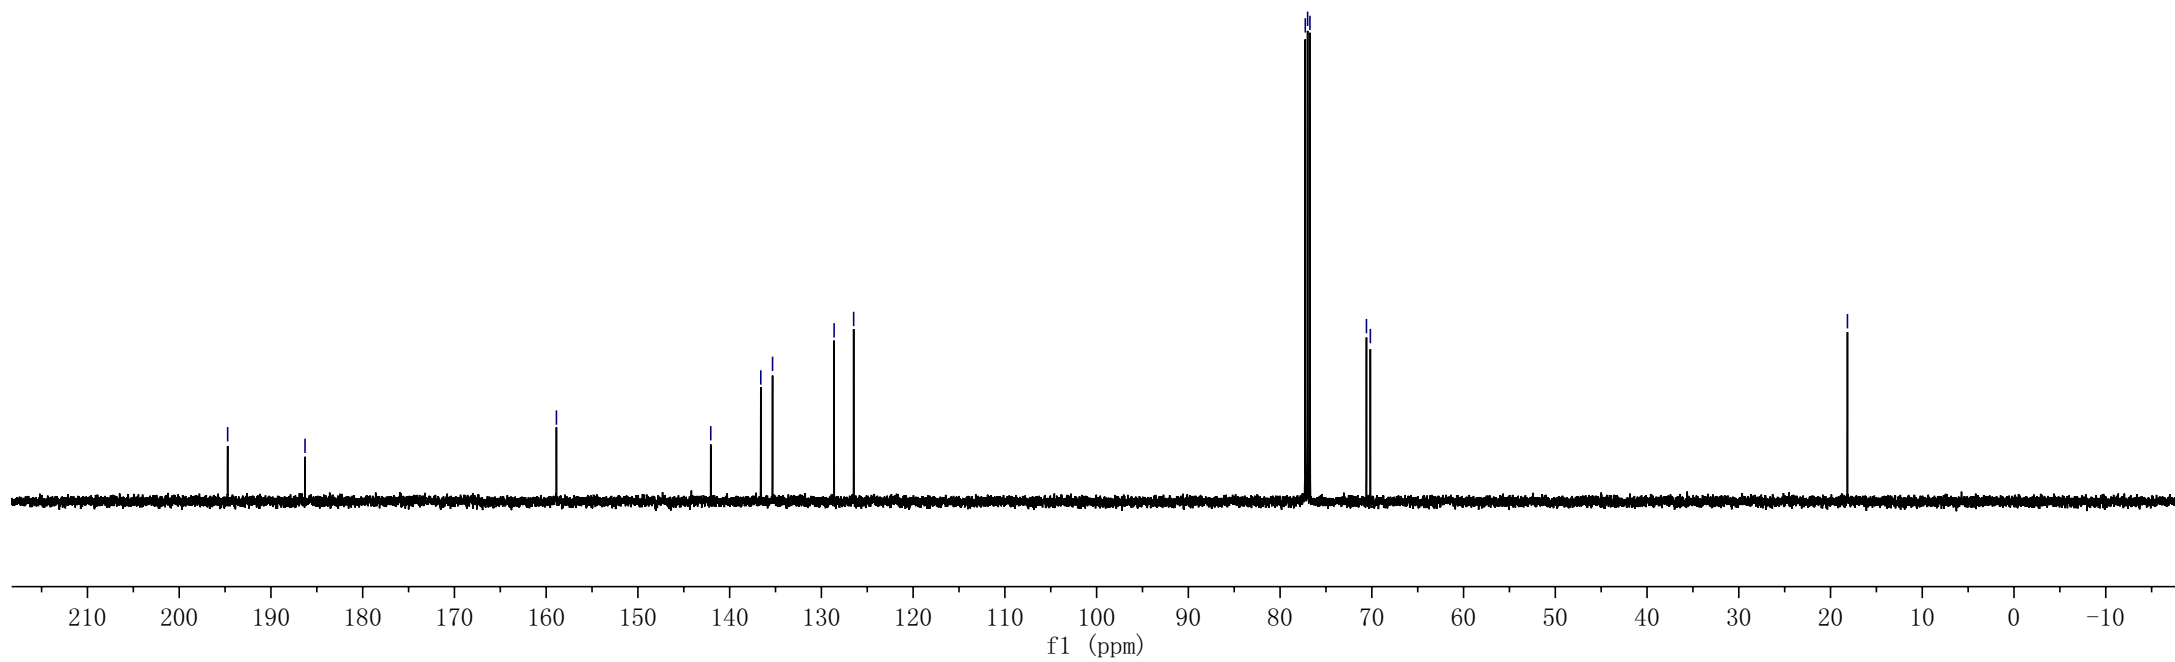

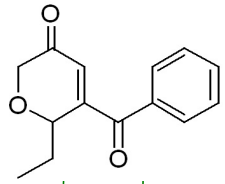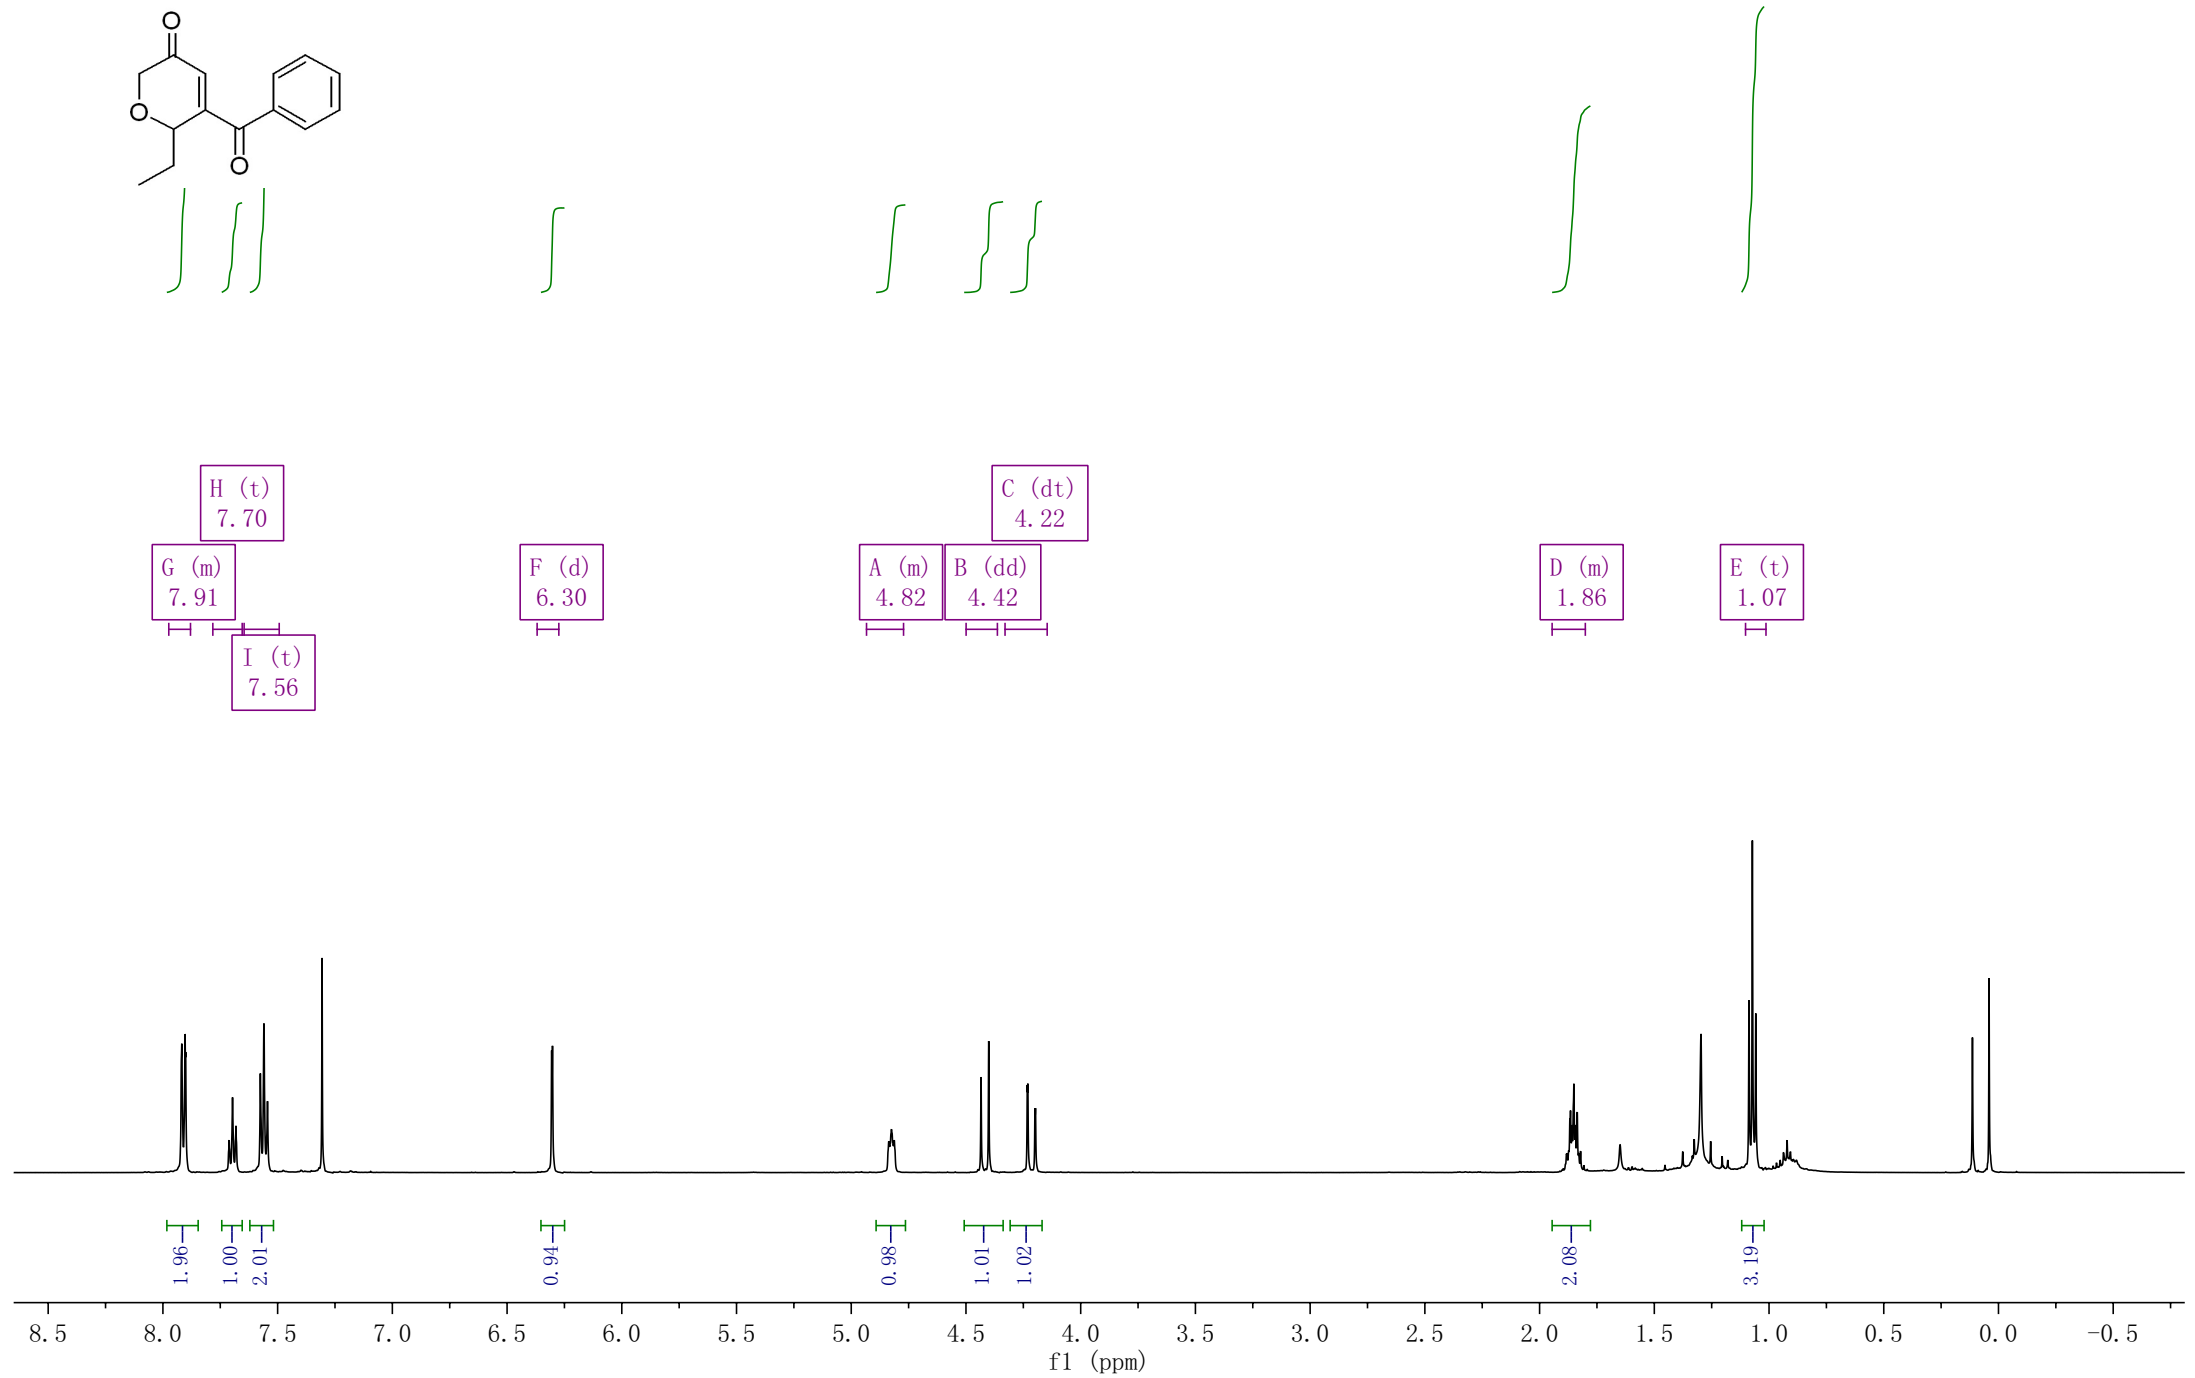

JKG-20150311-I-36A  
C13CPD CDC13 {DMSO-2015-1} ZHL 9

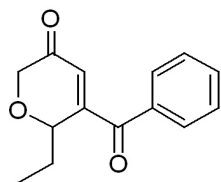

195.85  
194.84

158.27

134.98  
134.19  
129.74  
128.88  
128.13

77.25  
77.00  
76.75  
75.28  
69.82

25.04

9.99

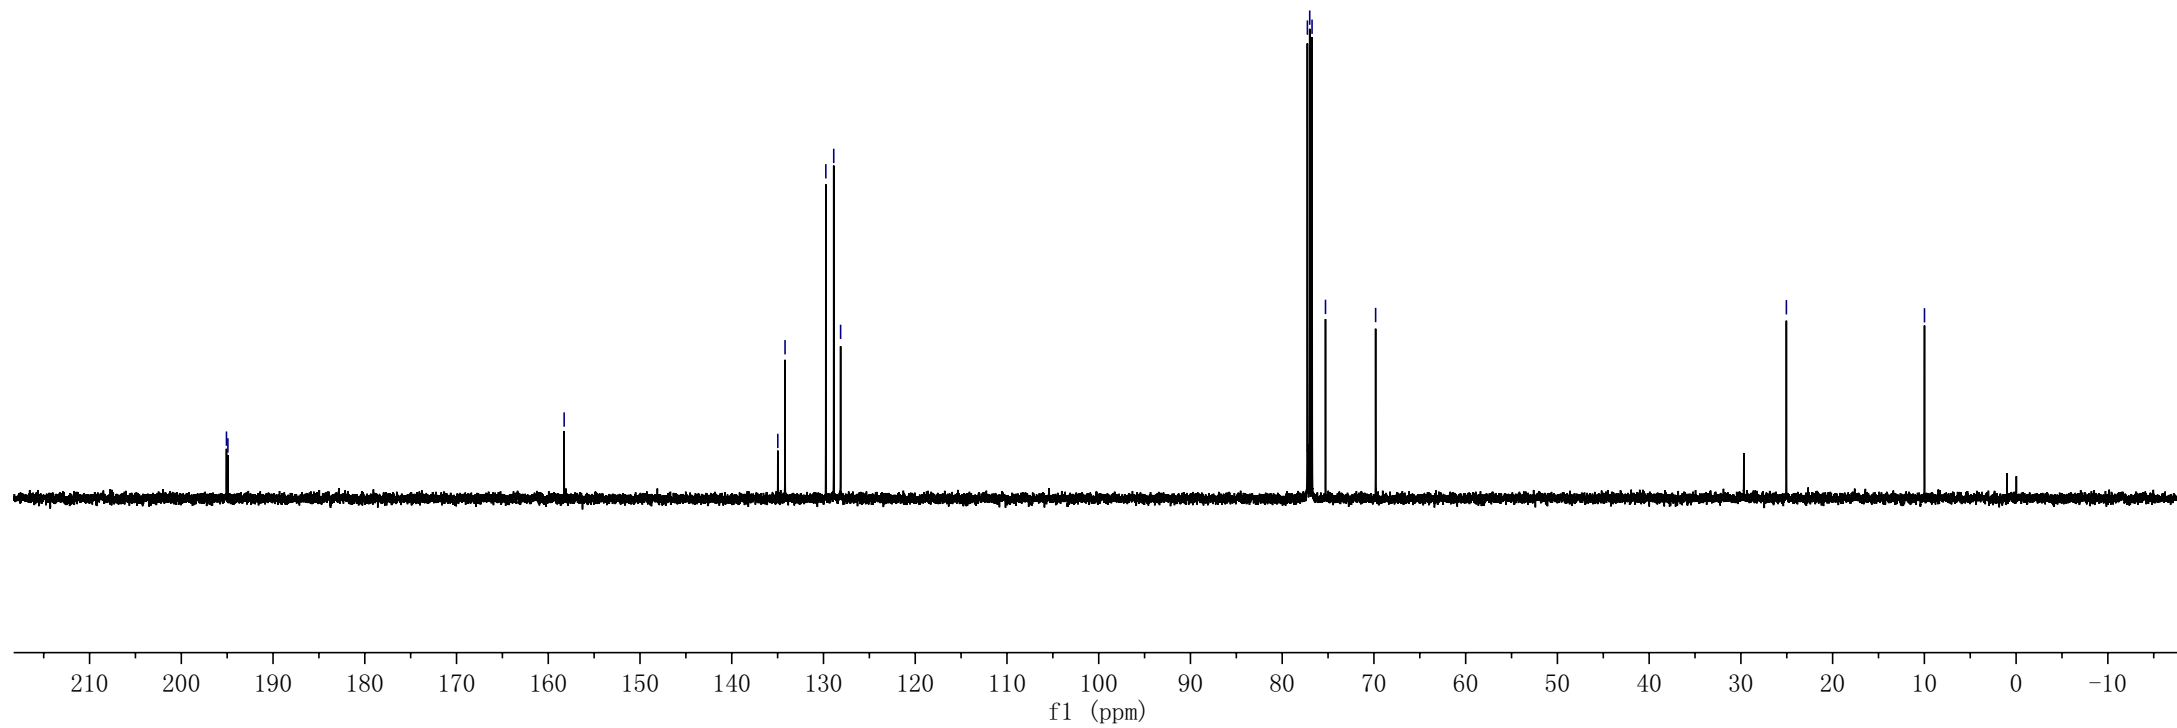

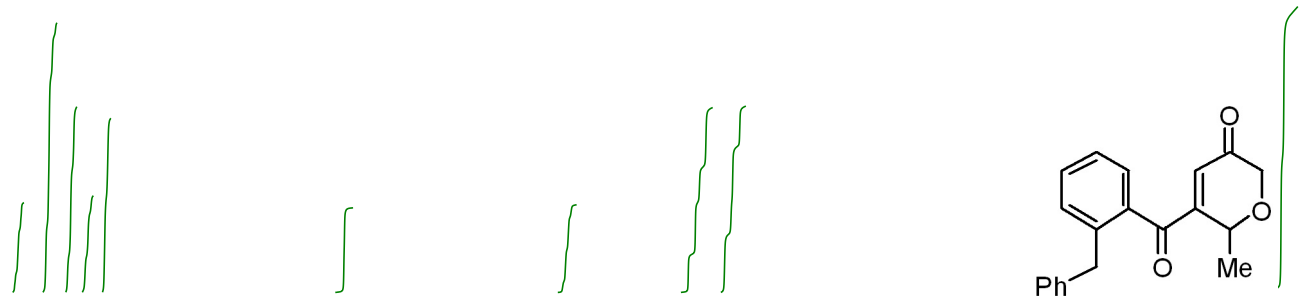

| Label | Multiplicity | Chemical Shift (ppm) |
|-------|--------------|----------------------|
| I     | (m)          | 7.31                 |
| G     | (t)          | 7.13                 |
| J     | (m)          | 7.46                 |
| F     | (t)          | 7.05                 |
| H     | (t)          | 7.21                 |
| E     | (d)          | 5.91                 |
| A     | (q)          | 4.85                 |
| B     | (dd)         | 4.23                 |
| C     | (m)          | 4.06                 |
| D     | (d)          | 1.44                 |

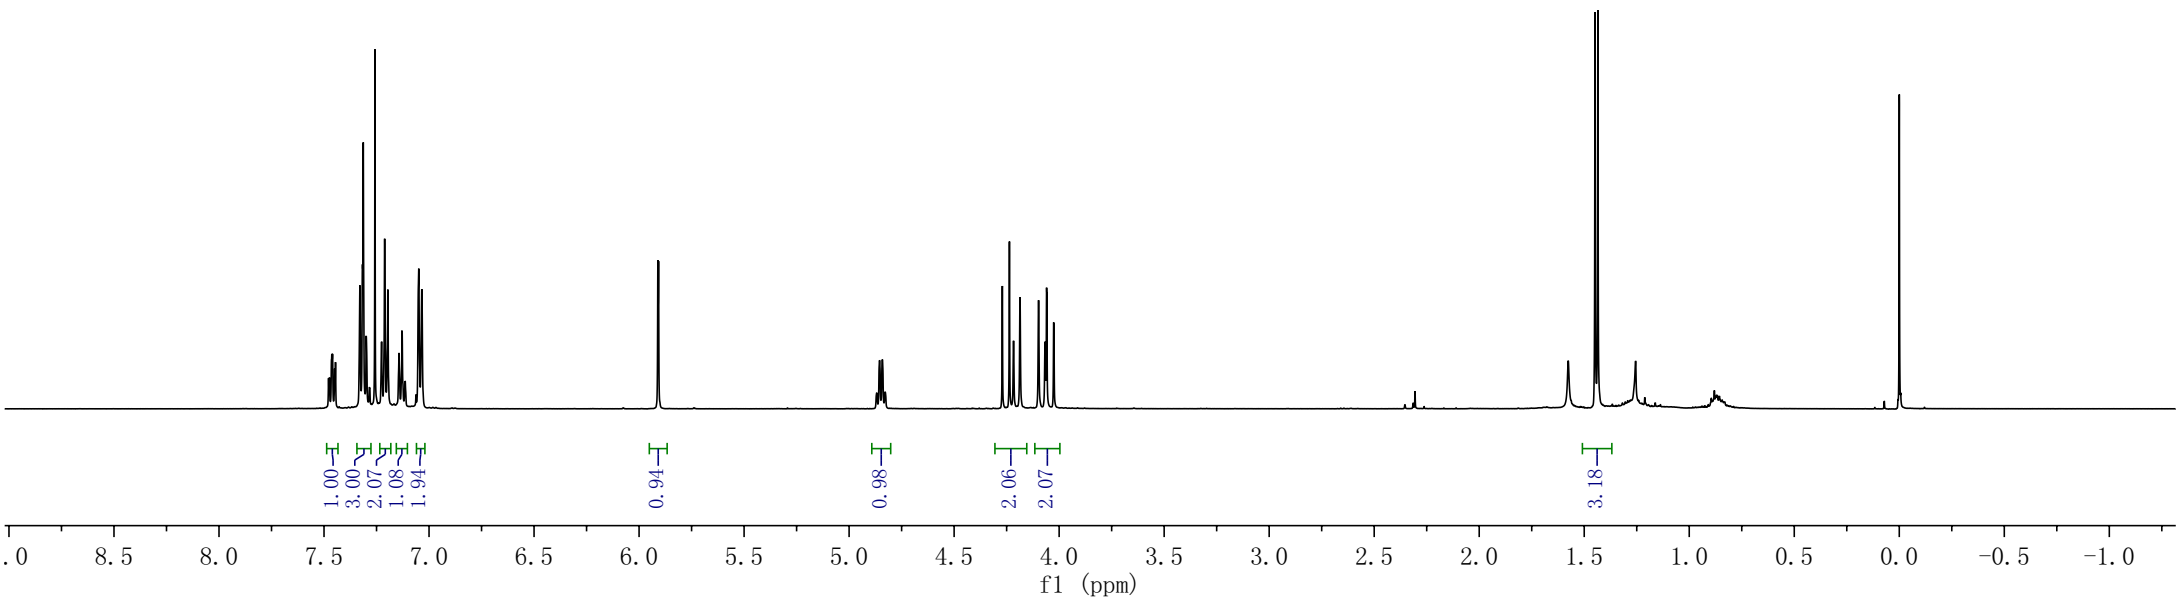

JKG-20150320-LX-I-2a  
C13 NMR (CDCl<sub>3</sub>) 125 MHz, 300 K, 1} ZHL 31

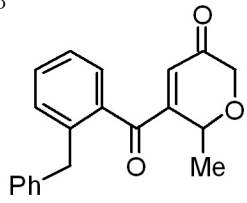

157.95

141.21  
140.05  
136.29  
131.70  
131.67  
130.10  
129.26  
128.40  
126.24  
126.01

77.25  
77.00  
76.75  
69.41  
68.63

38.95

17.87

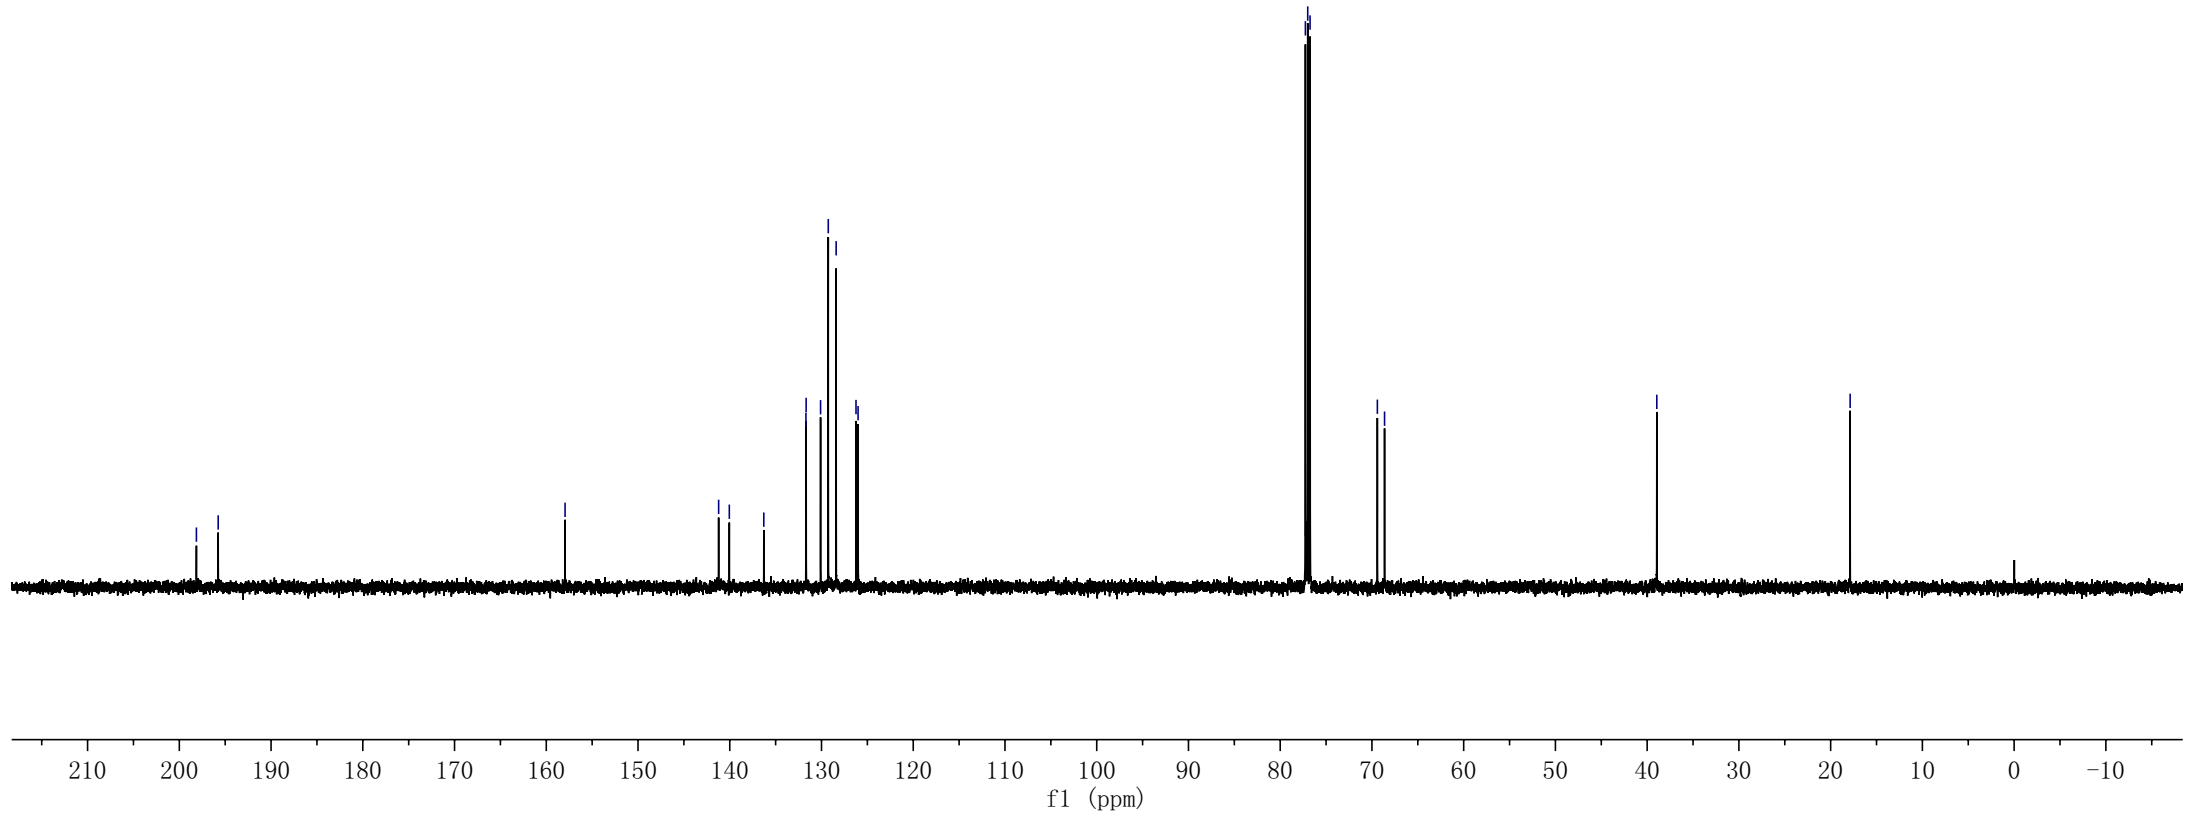

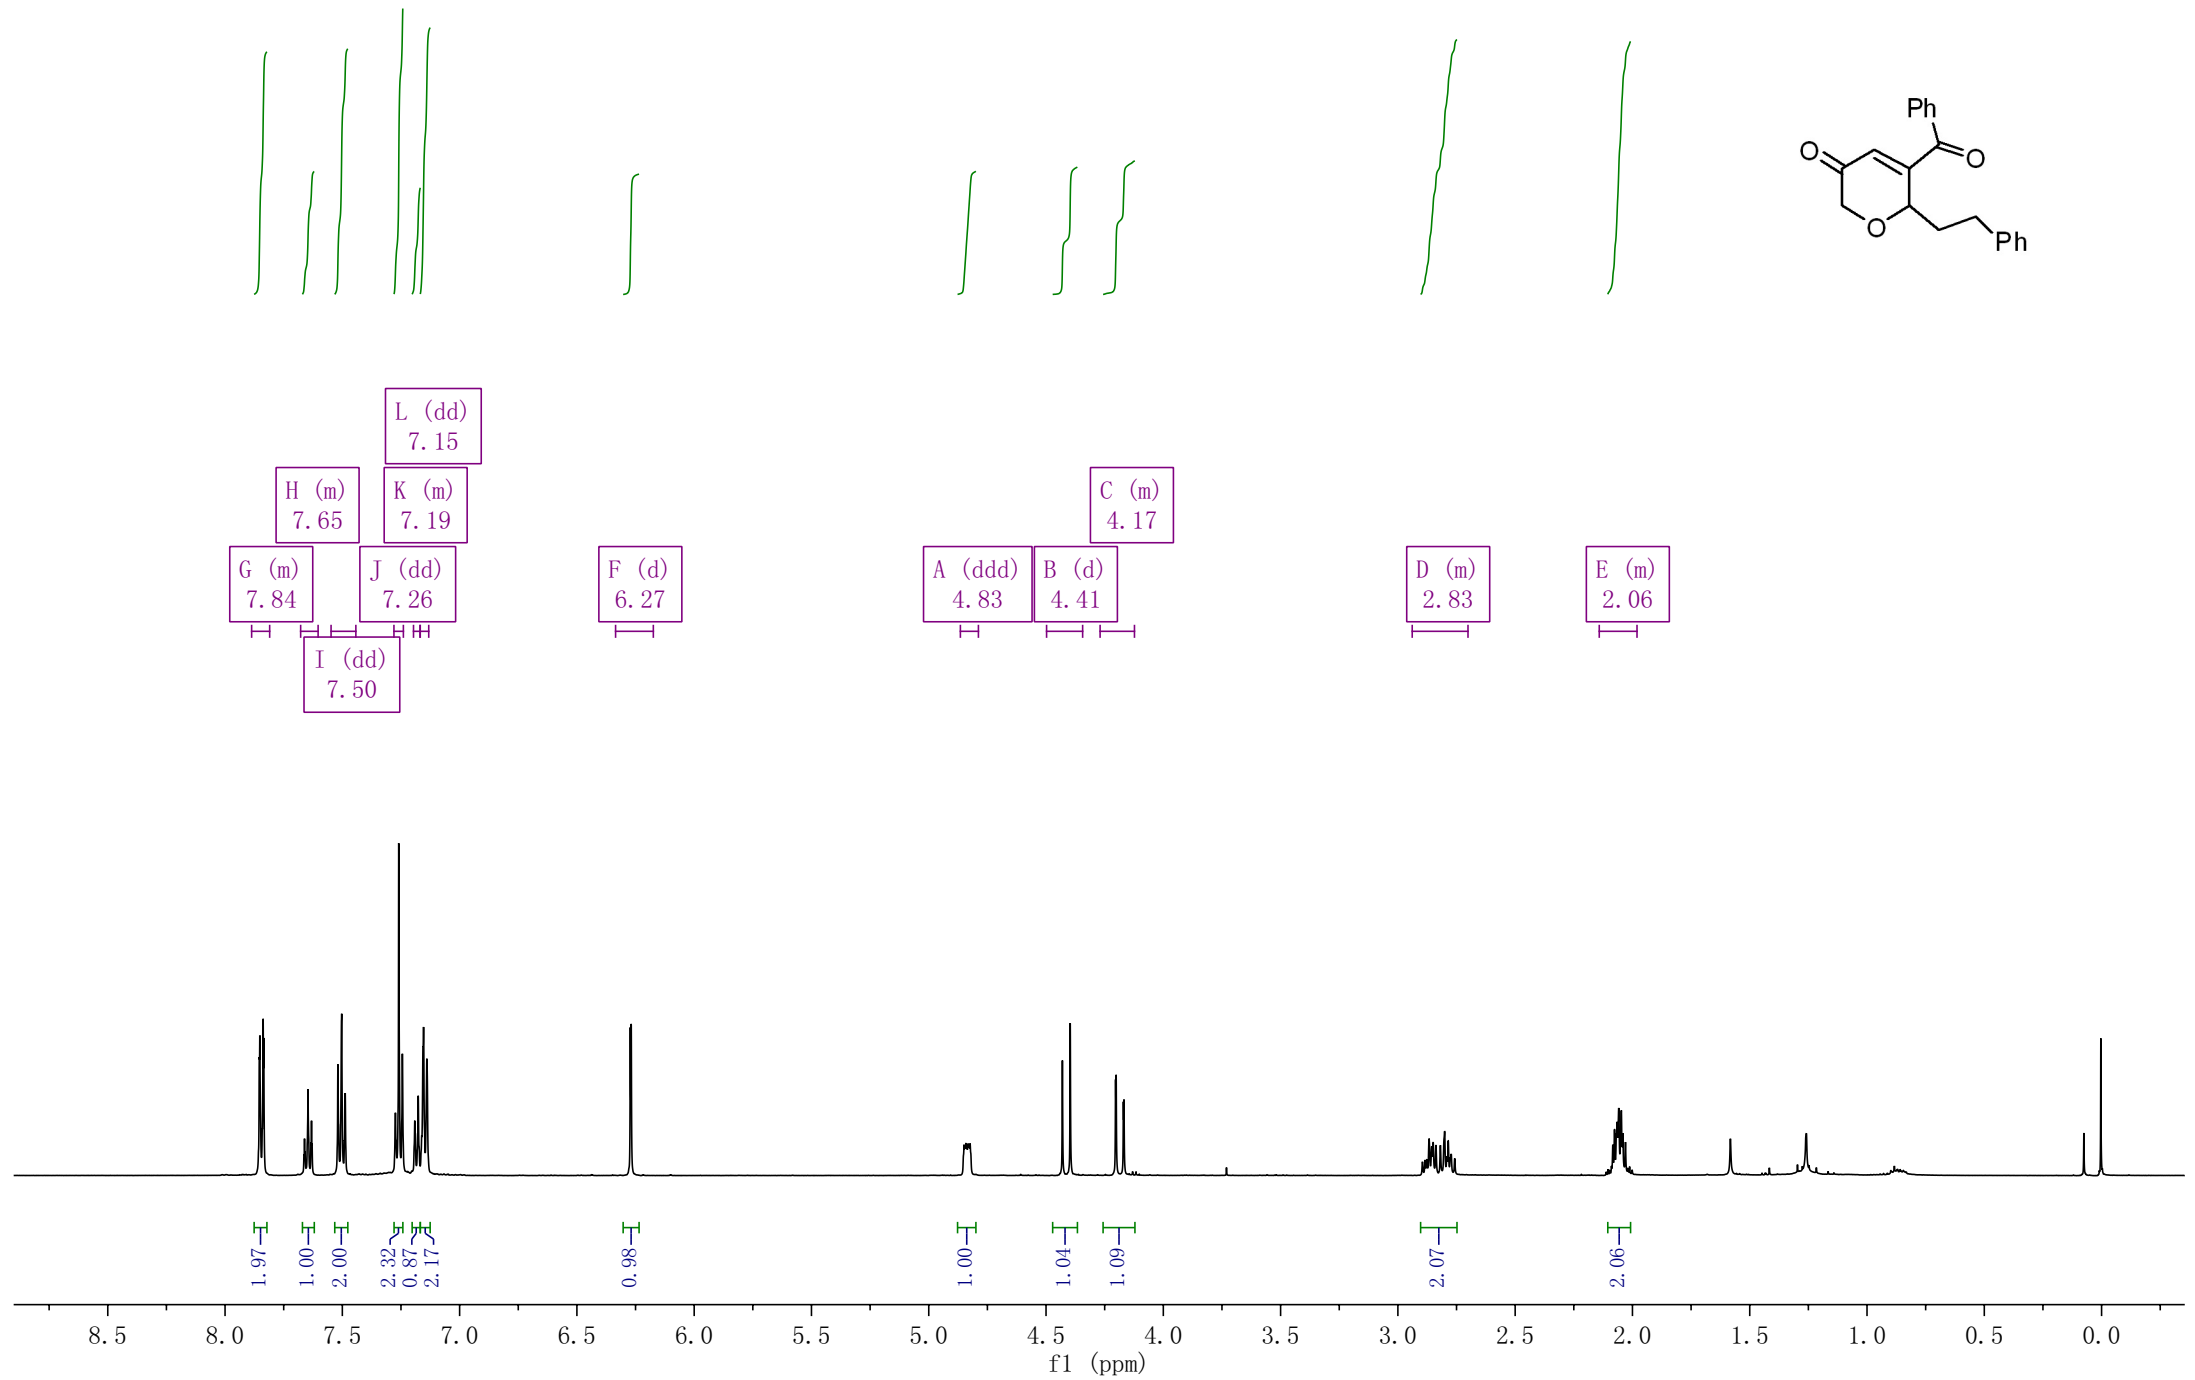

JKG-20150309-69B-3  
C13CPD CDC13 {DMSO-d6-15-1} ZHL 13

197.81  
196.83

158.04

140.75  
134.97  
134.26  
129.72  
128.91  
128.47  
128.44  
128.11  
126.14

77.25  
77.00  
76.75  
73.49  
69.83

33.44  
31.70

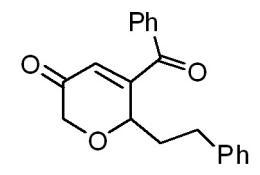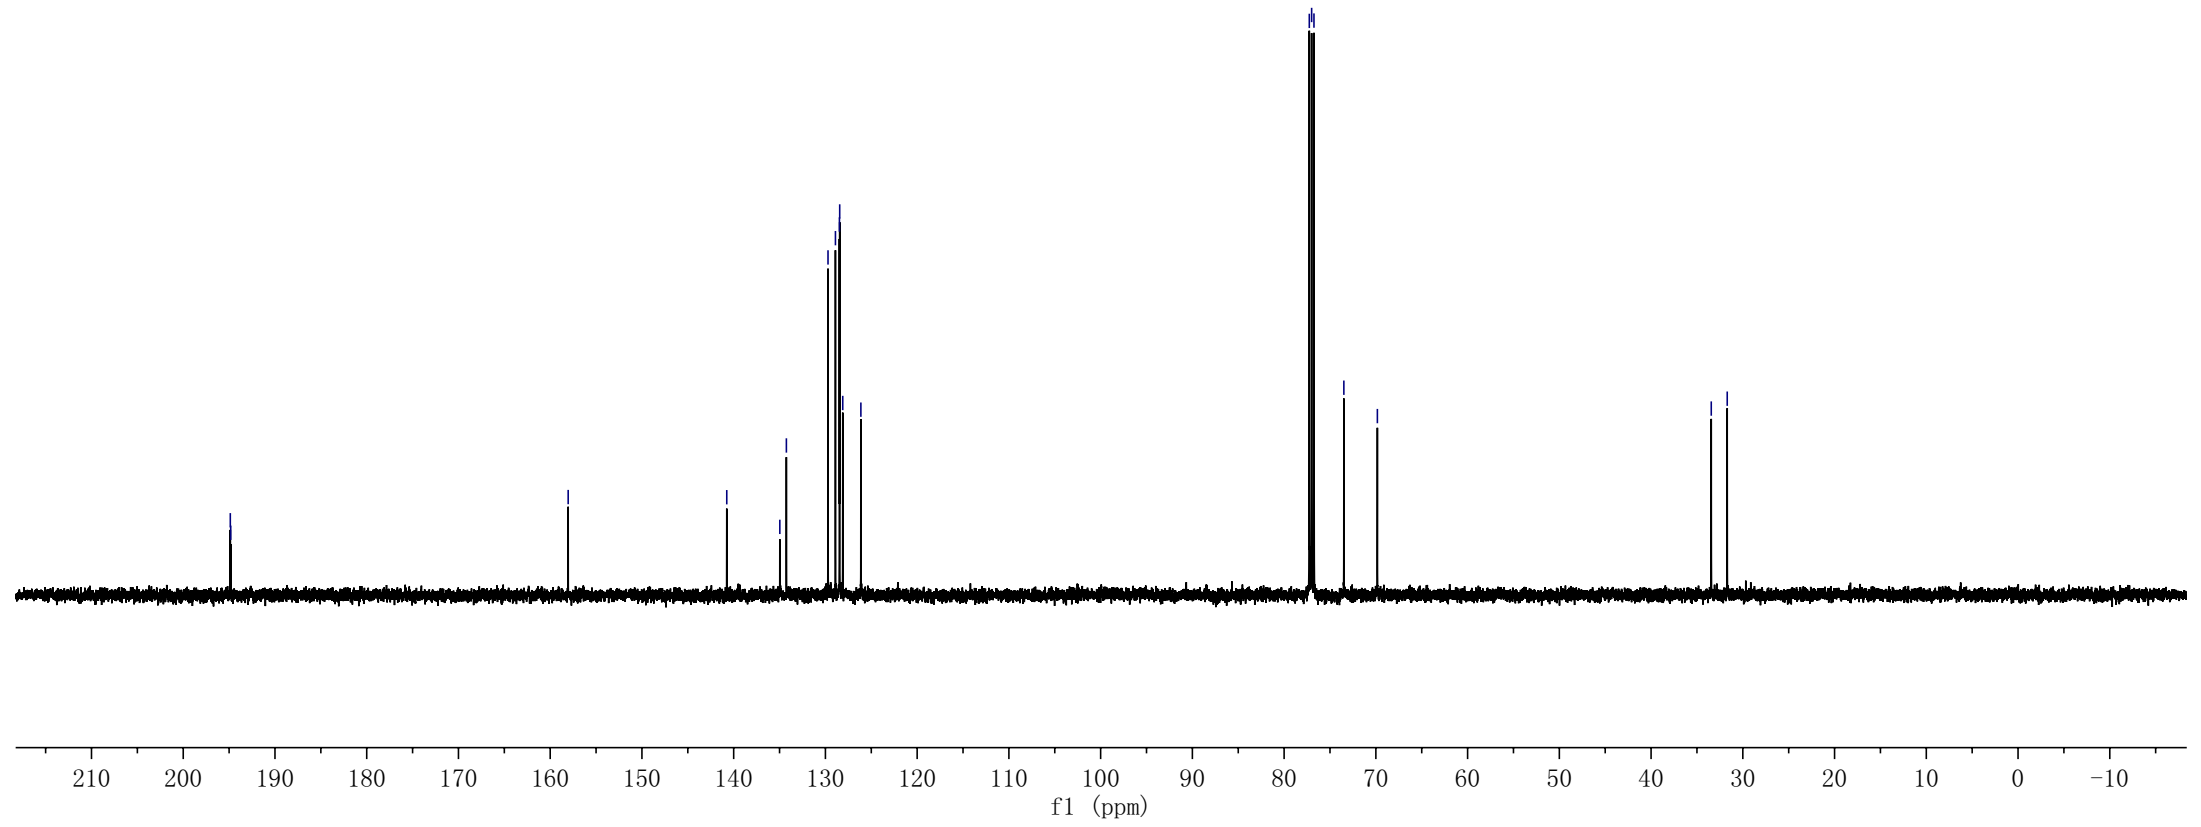



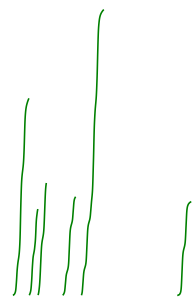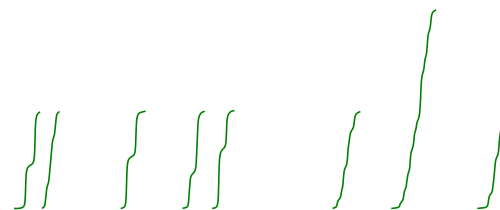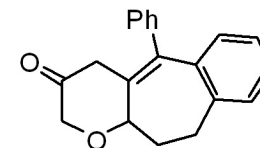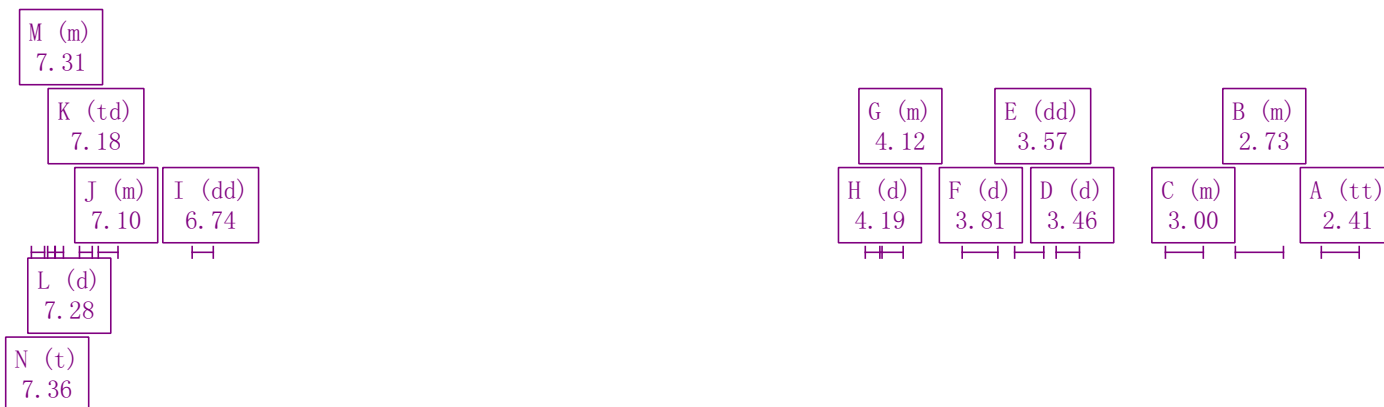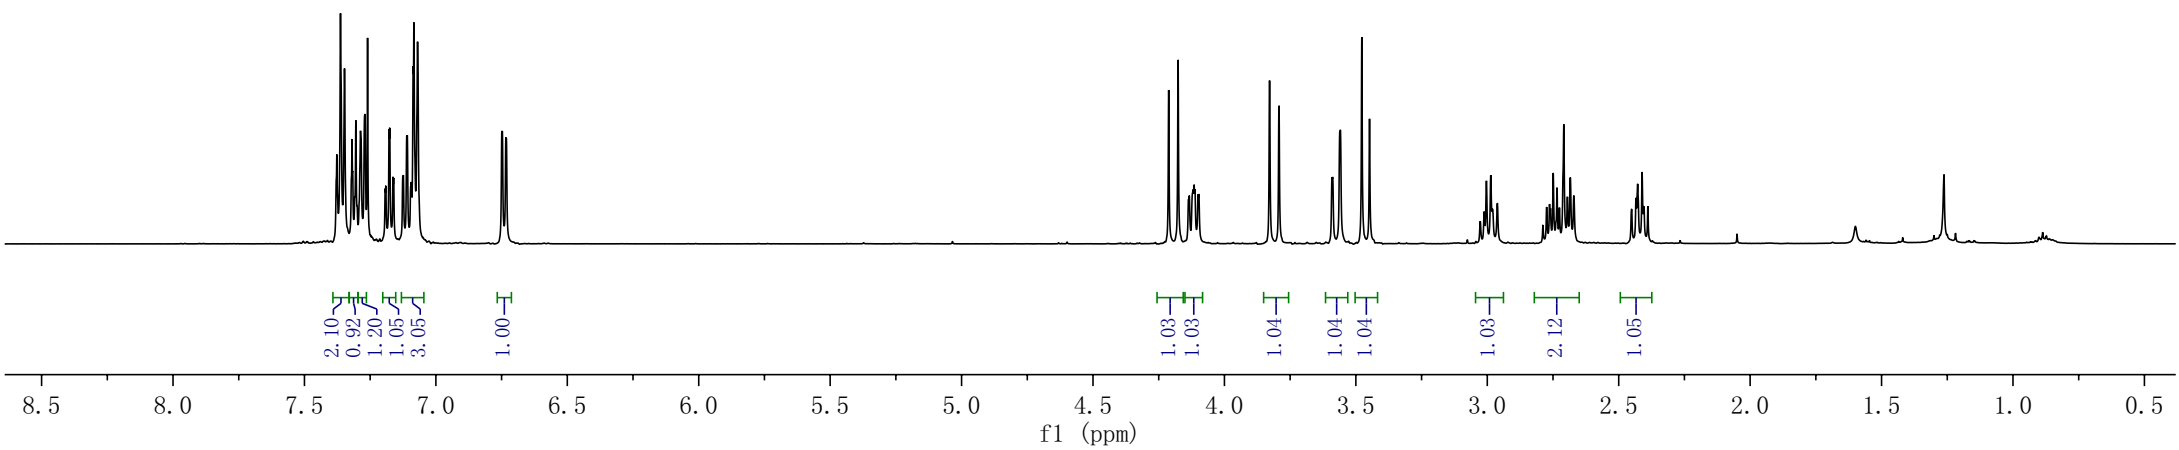

JKG-20150309-69B-1  
C13CPD: CDC13 {D:\2015-1} ZHL 12

140.46  
140.43  
139.85  
137.91  
129.98  
129.66  
129.46  
128.40  
128.36  
127.45  
127.33  
126.28

77.25  
77.00  
76.74  
72.55

41.83  
40.38

30.19

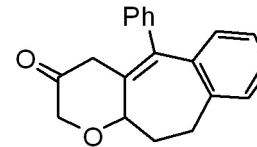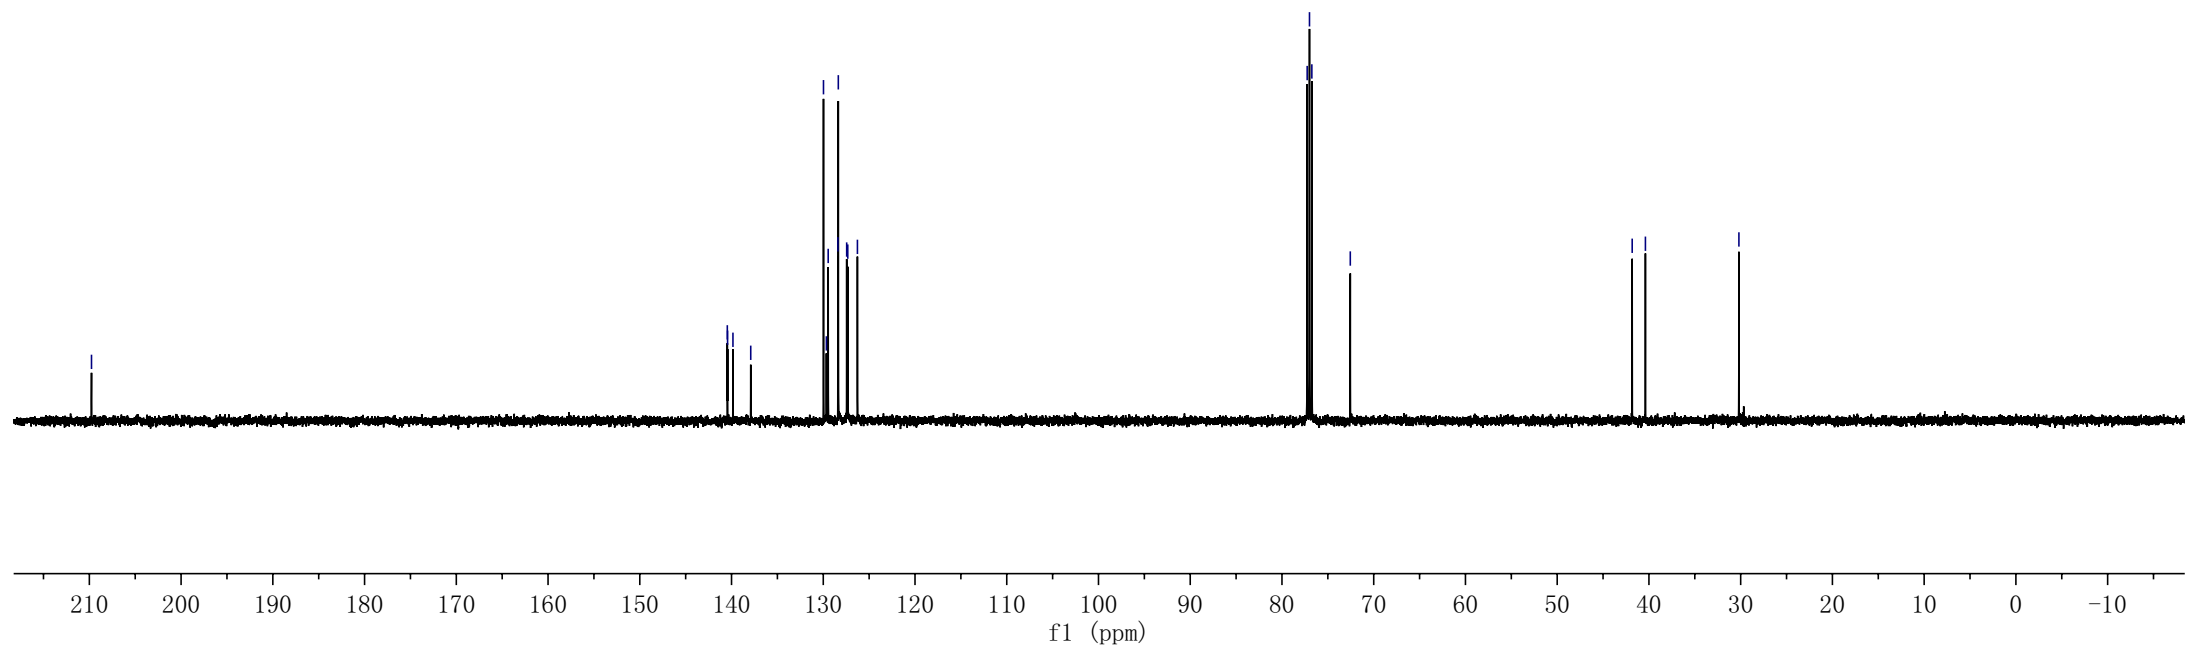

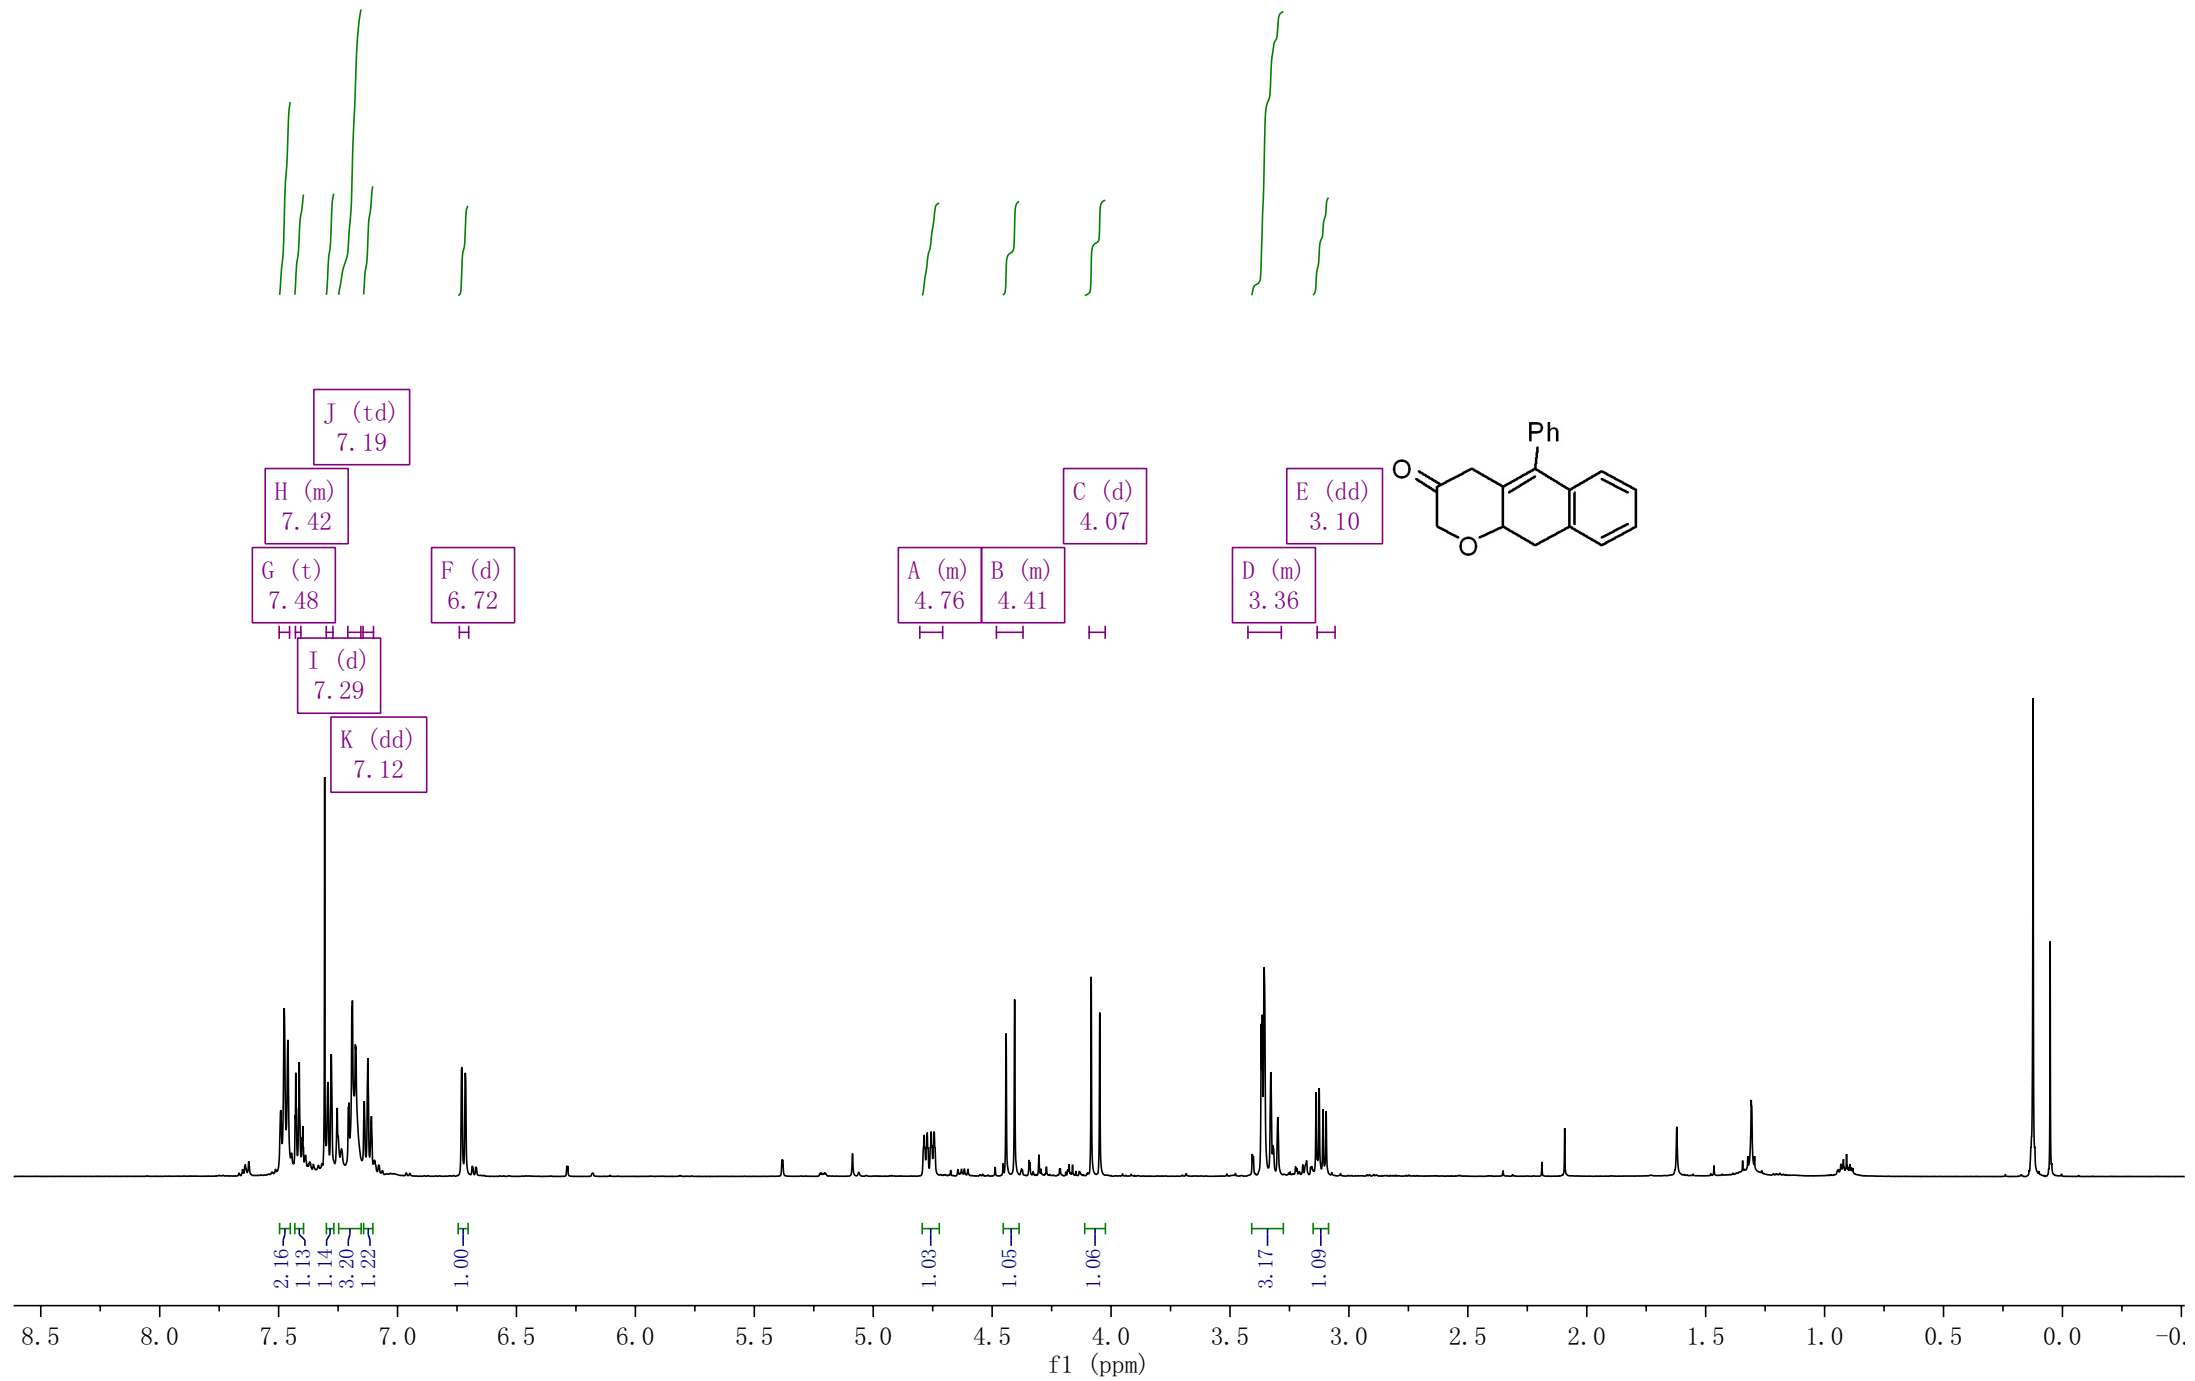

JKG-20150109-61-B  
C13CPD CDC13 {D:\2015-1} ZHL 26

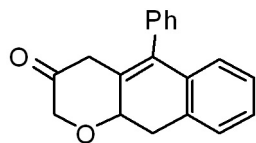

137.10  
135.62  
135.47  
132.87  
129.72  
129.49  
128.81  
128.10  
127.56  
127.20  
127.03  
126.06

77.25  
77.00  
76.75  
75.28  
72.48

41.36

33.68

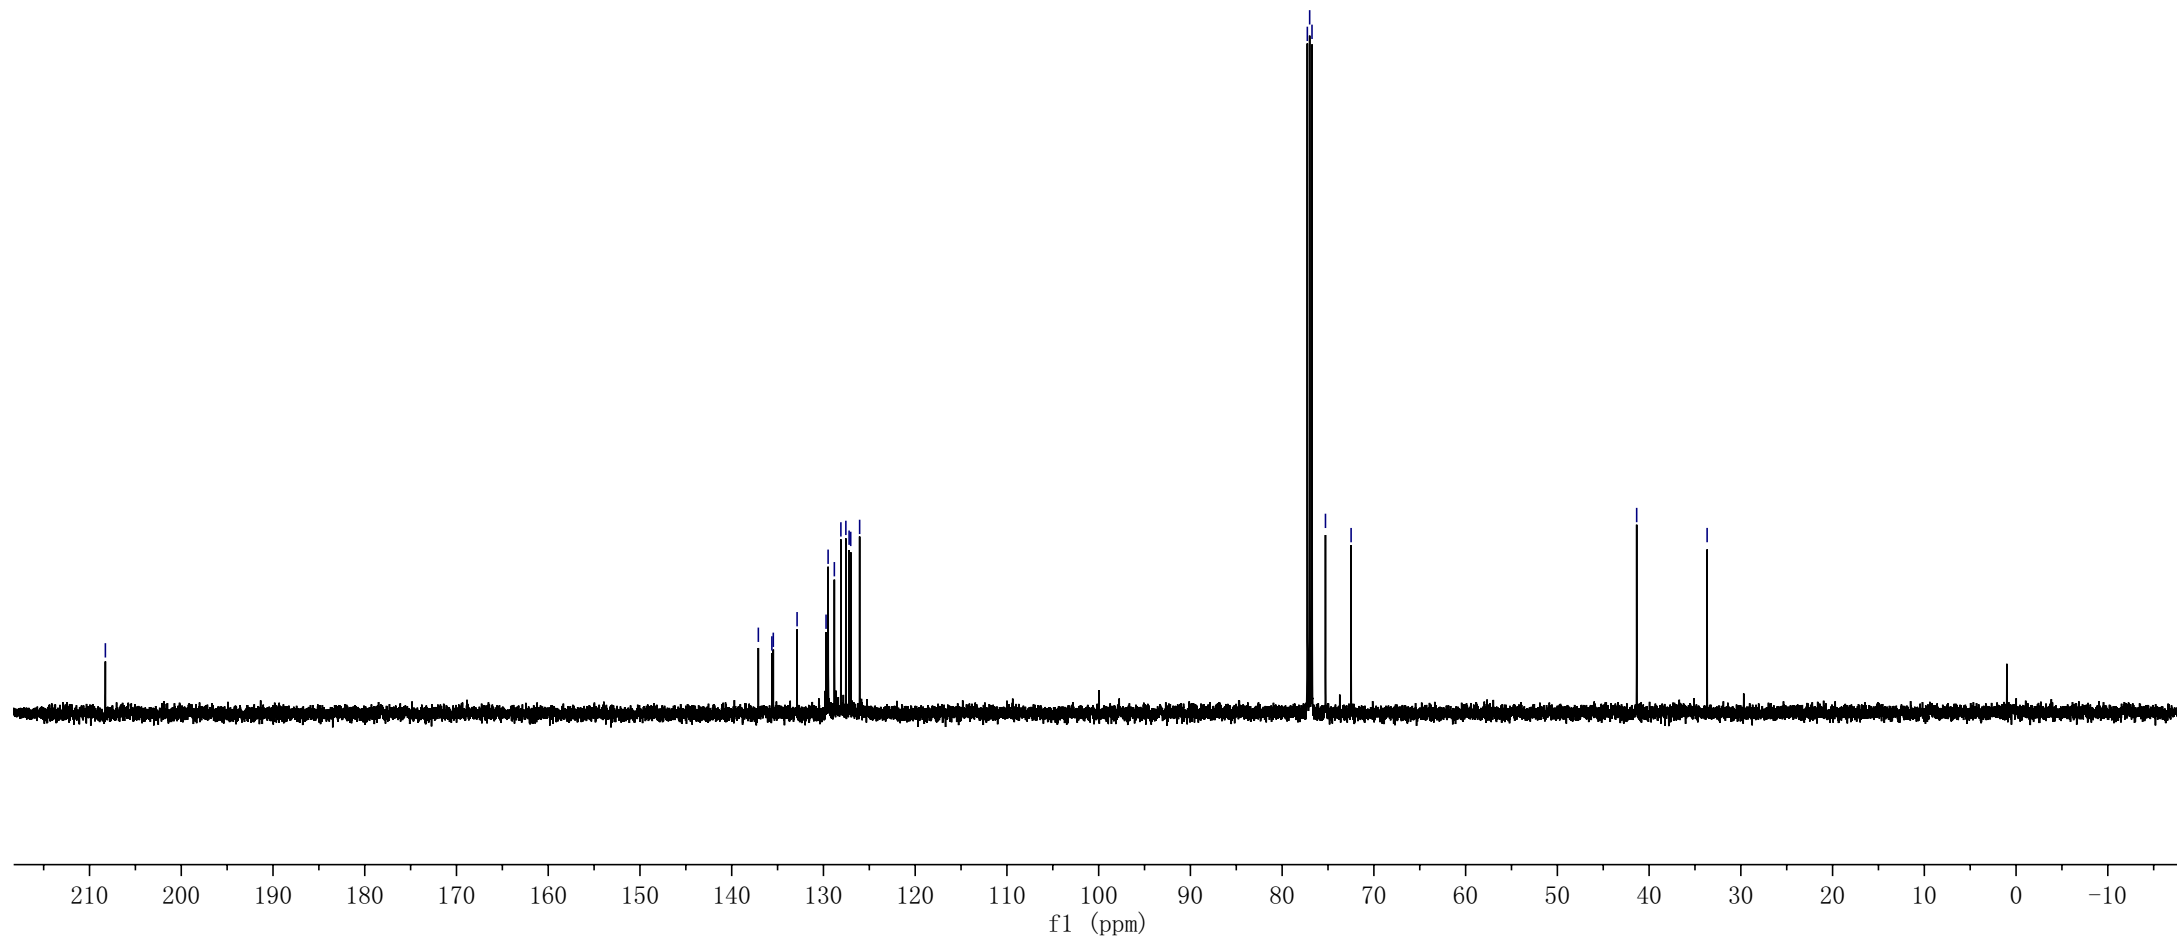

Parameters

Parameter Value  
 Data File Name D:/ 文章/ paper-1-NMR/ NMR/ jkg-03-26/ JKG-20150326-1-80A/ 10/ fid  
 Title JKG-20150326-1-80A  
 Solvent CDCl3

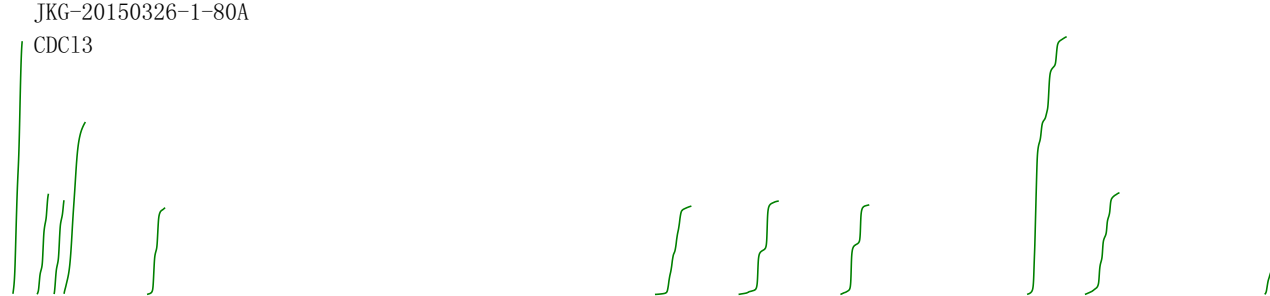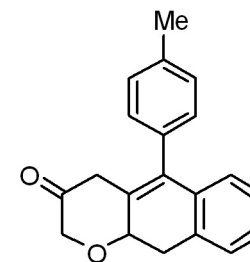

|               |               |               |                |               |               |               |               |               |
|---------------|---------------|---------------|----------------|---------------|---------------|---------------|---------------|---------------|
| I (m)<br>7.27 | H (m)<br>7.14 | G (t)<br>6.74 | A (td)<br>4.74 | B (d)<br>4.42 | C (m)<br>4.13 | D (m)<br>3.34 | E (m)<br>3.11 | F (m)<br>2.45 |
|---------------|---------------|---------------|----------------|---------------|---------------|---------------|---------------|---------------|

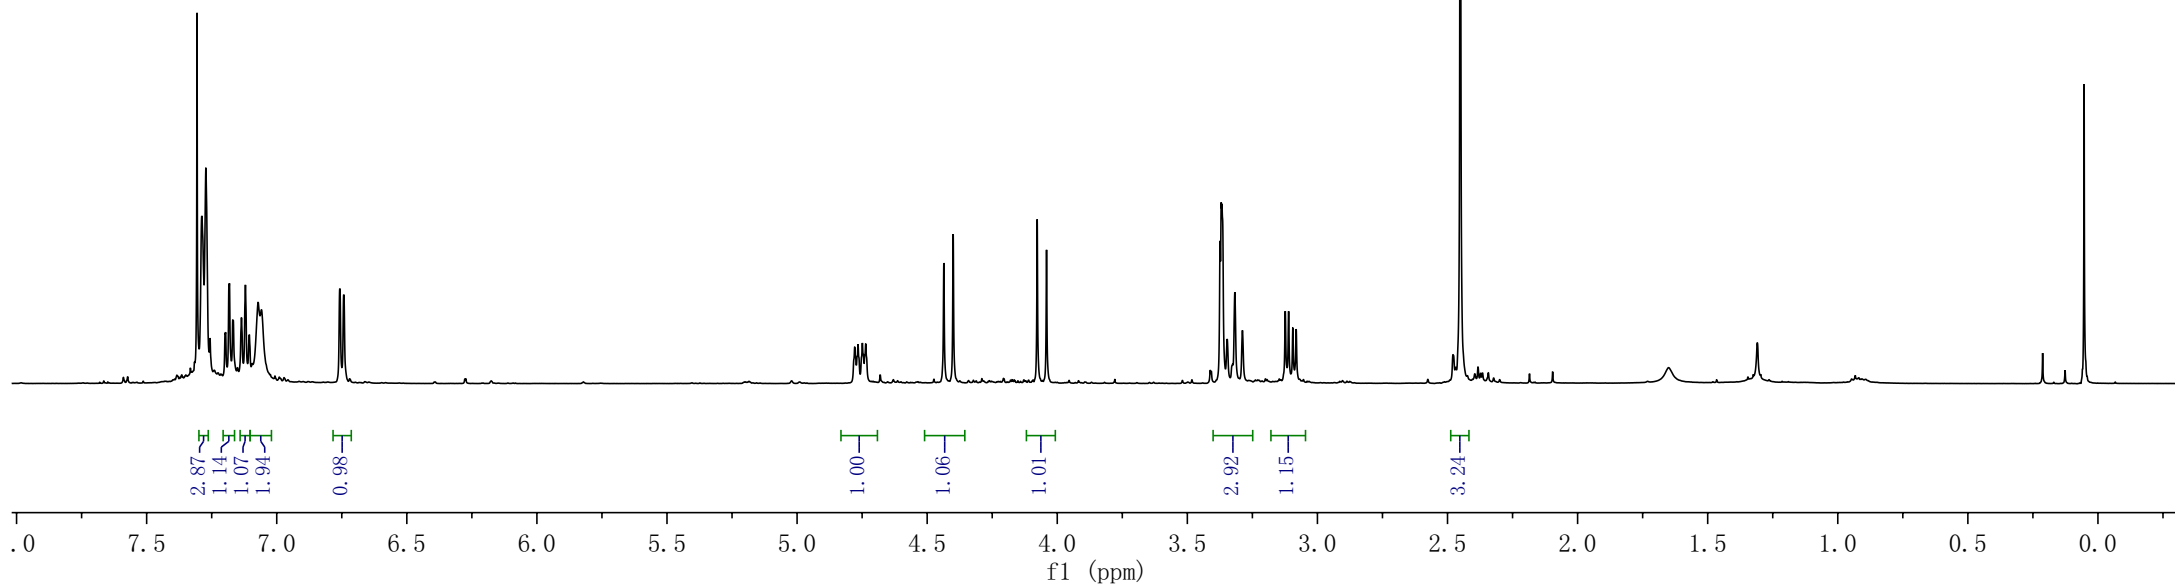

Parameter 208.37  
Data File Name D:/ 文章/ paper-1-NMR/ NMR/ jkg-03-26/ JKG-20150326-1-80A/ 10/ fid  
Title JKG-20150326-1-80A  
Solvent CDCl3

Parameters Value  
137.20  
135.62  
135.57  
134.02  
132.88  
129.57  
129.47  
129.36  
128.05  
127.12  
126.98  
126.07

77.25  
77.00  
76.75  
75.29  
72.41

41.37  
33.65

21.21

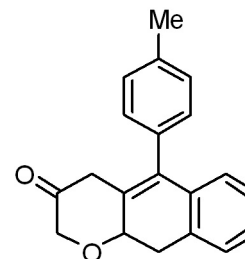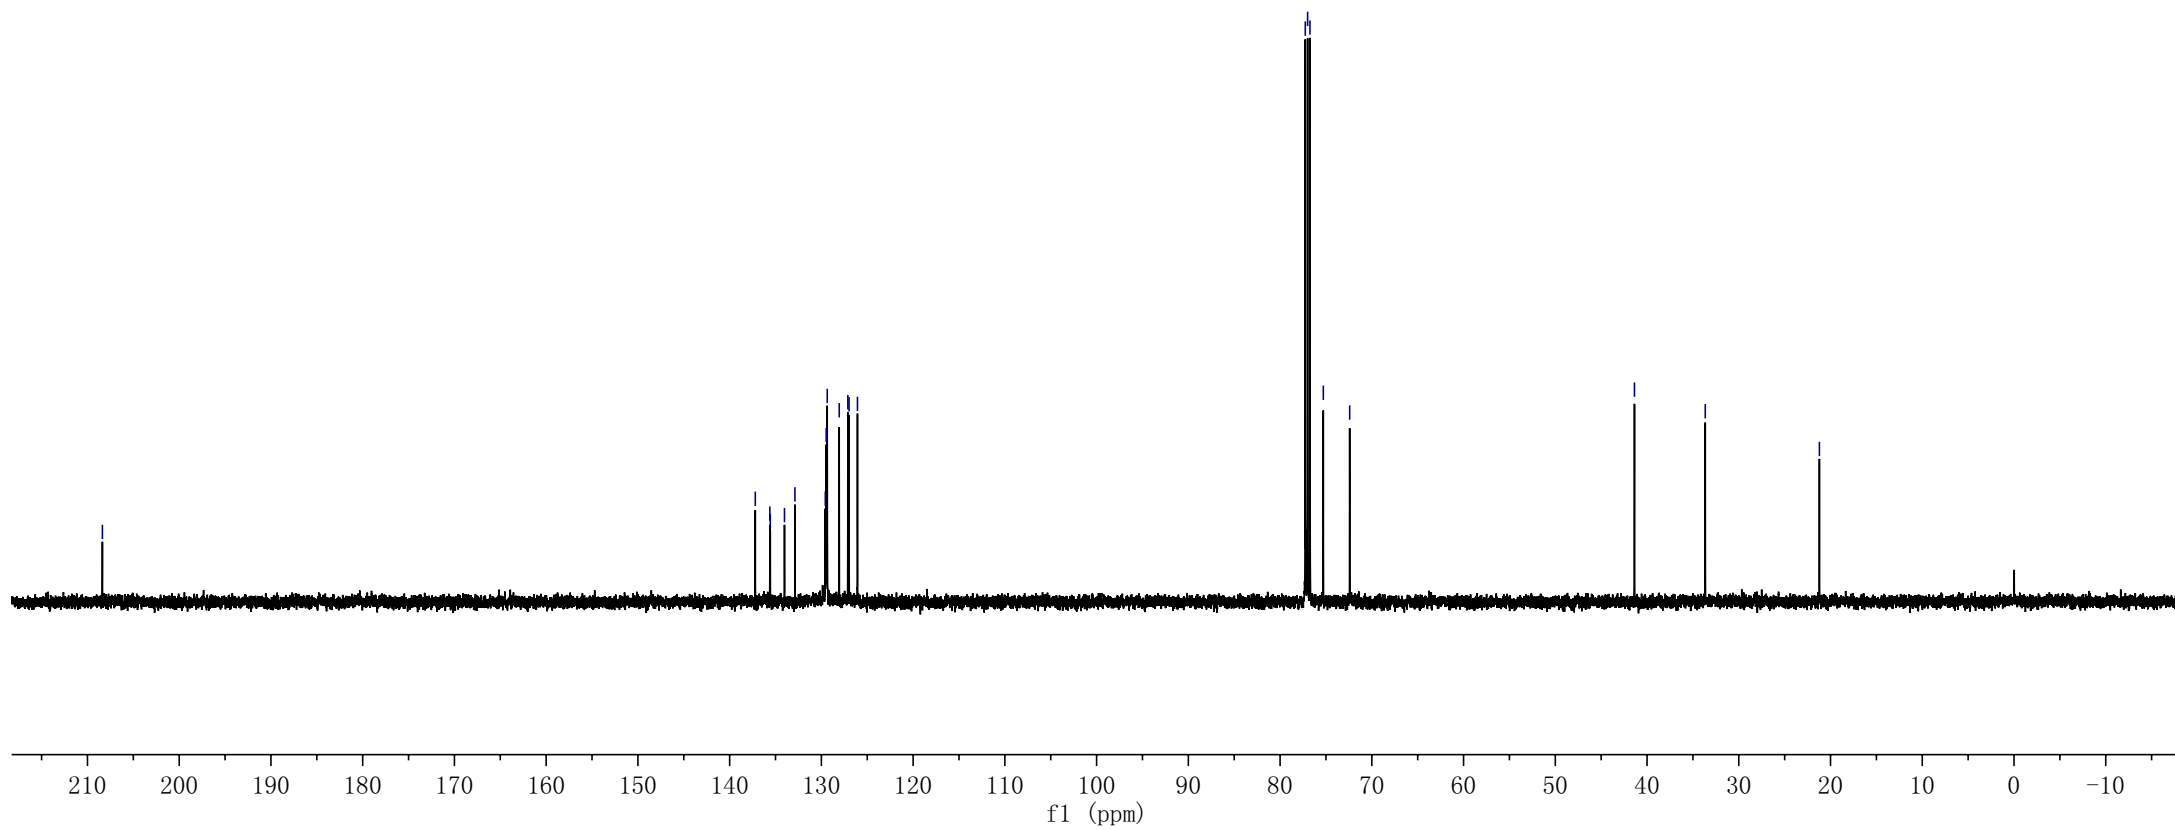

Parameters

Parameter Value  
Data File Name D:/ 文章/ paper-1-NMR/ NMR/ jkg-03-26/ JKG-20150326-1-80A/ 10/ fid  
Title JKG-20150326-1-80A  
Solvent CDCl3

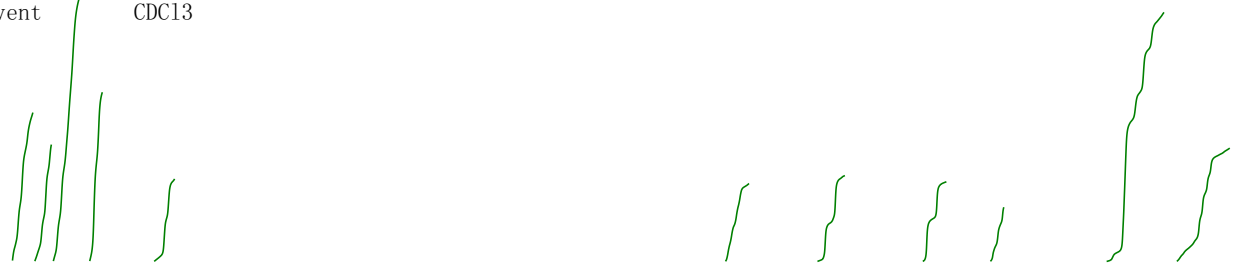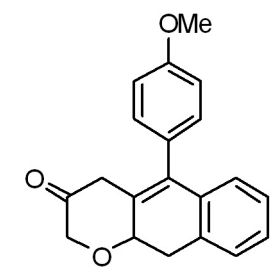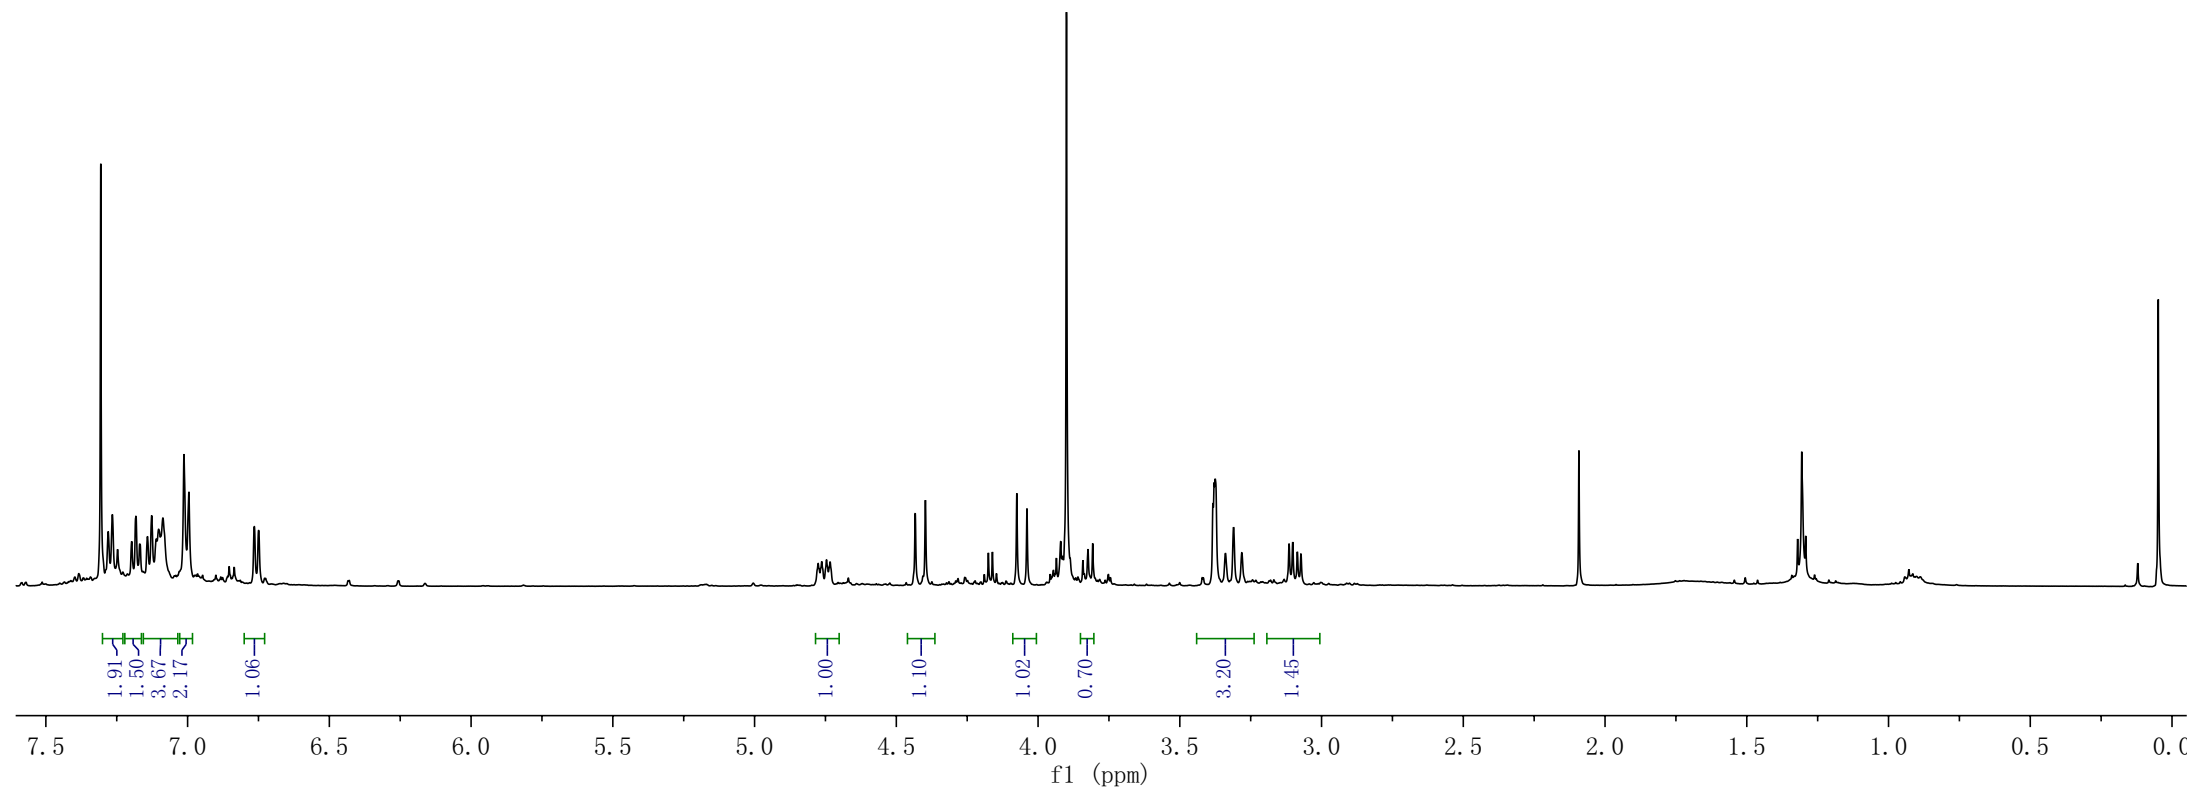

Parameter Value  
Data File Name D:/ 文章/ paper-1-NMR/ NMR/ jkg-03-26/ JKG-20150326-1-80A/ 10/ fid  
Title JKG-20150326-1-80A  
Solvent CDC13

Parameters Value  
158.94  
135.74  
135.26  
132.90  
130.66  
129.73  
129.19  
128.07  
127.13  
127.00  
126.06  
114.22

77.25  
77.00  
76.75  
75.29  
72.35

55.28

41.41

33.61

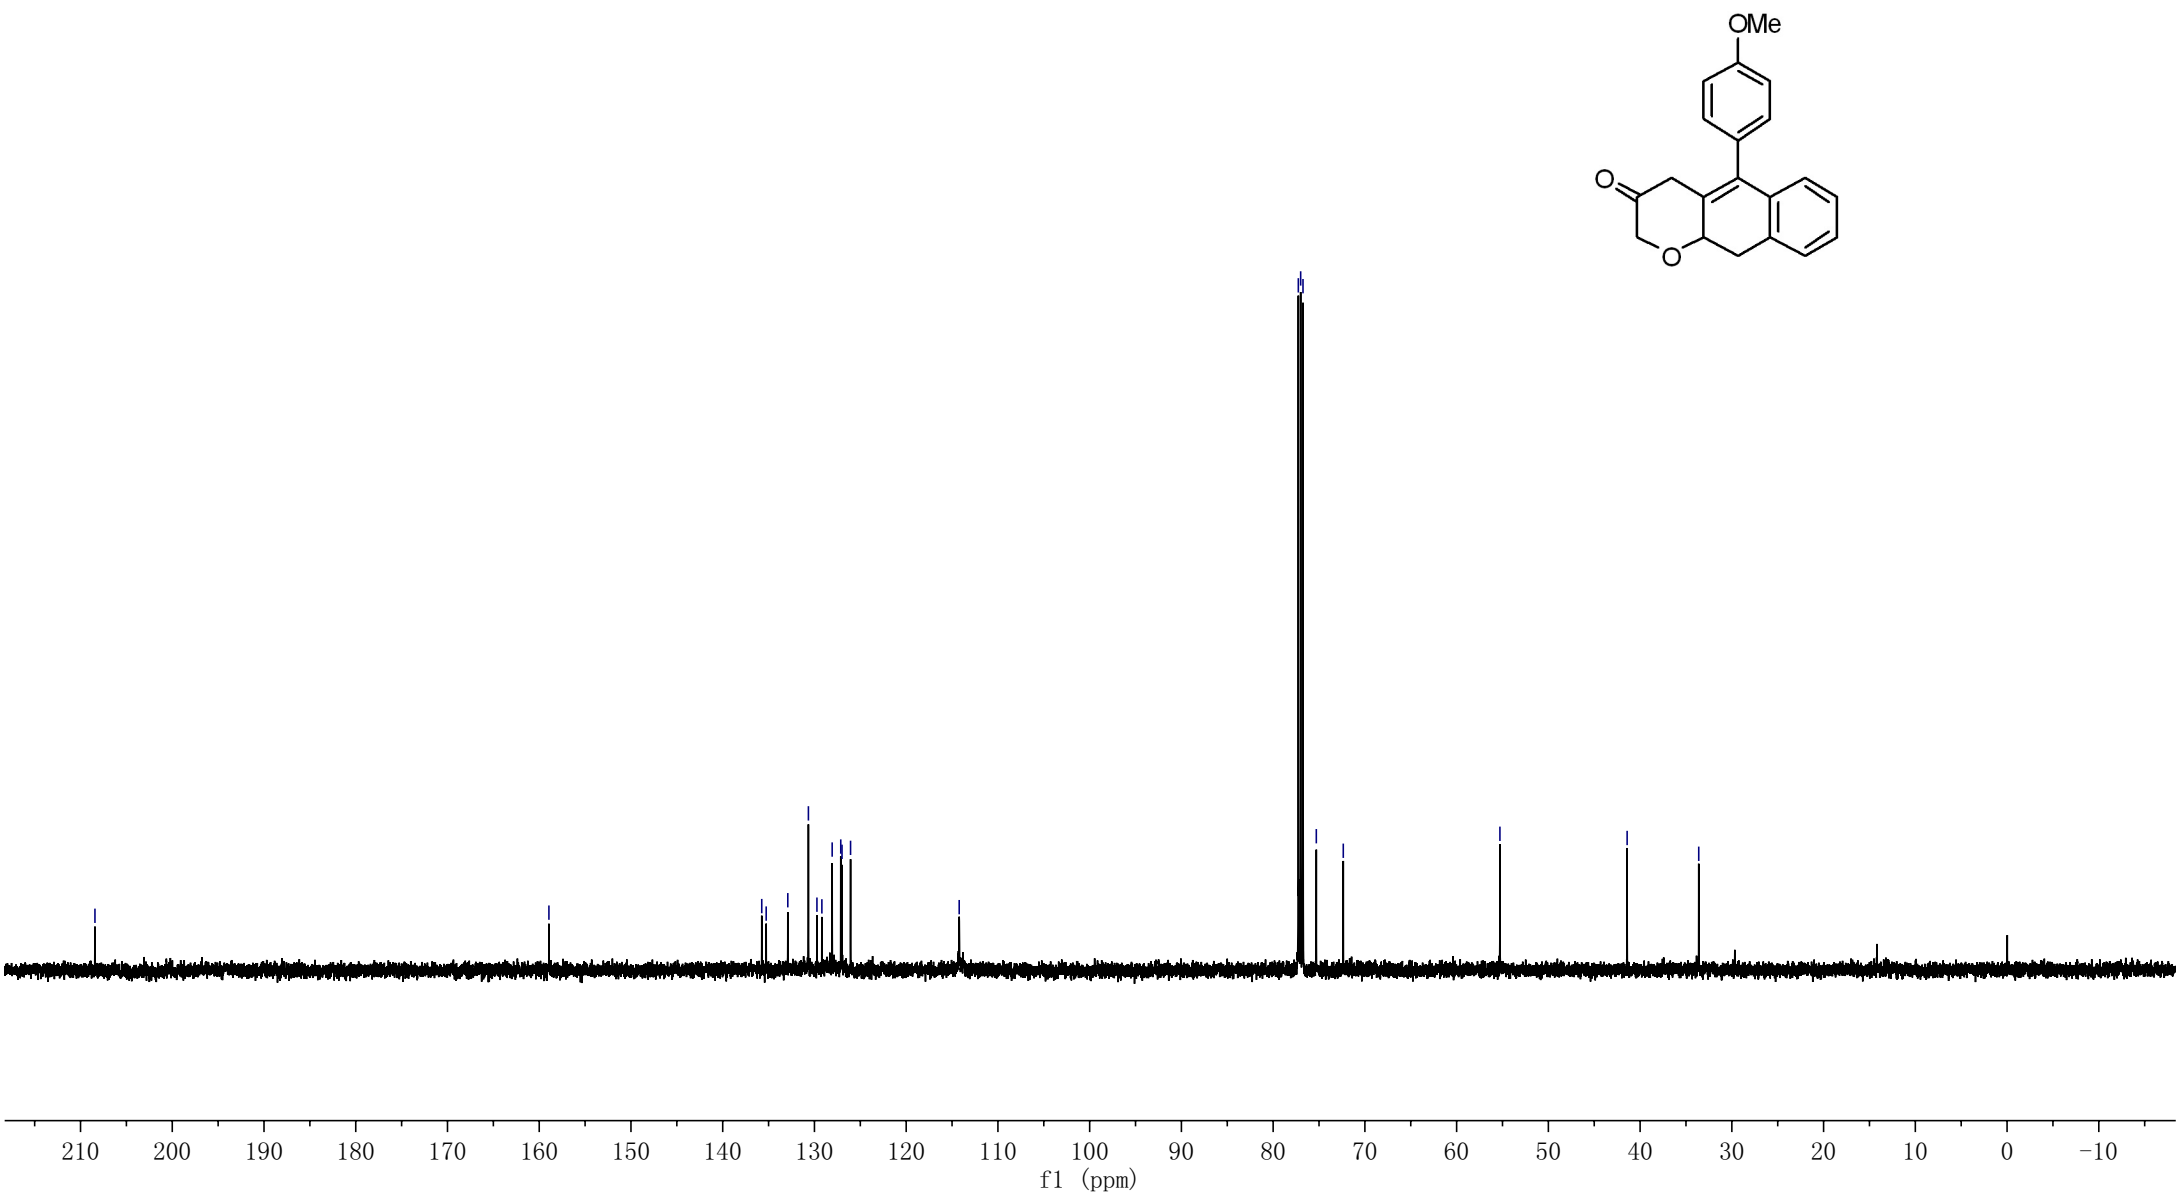



Parameters

Parameter Value  
 Data File Name D:/ 文章/ paper-1-NMR/ NMR/ jkg-03-26/ JKG-20150326-1-80A/ 10/ fid  
 Title JKG-20150326-1-80A  
 Solvent CDCl3

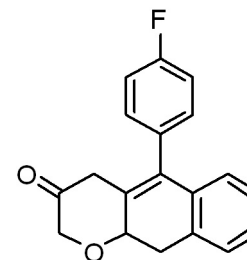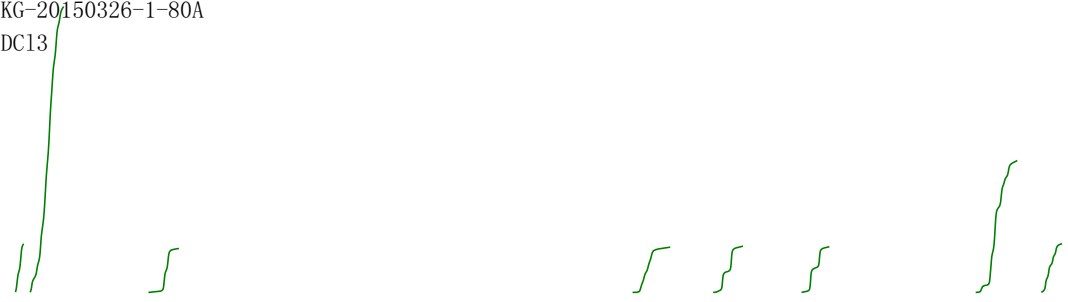

|               |                |               |
|---------------|----------------|---------------|
| H (m)<br>7.17 | B (m)<br>4.40  | E (m)<br>3.13 |
| G (m)<br>7.29 | A (dt)<br>4.73 | D (m)<br>3.33 |
| F (d)<br>6.69 | C (m)<br>4.08  |               |

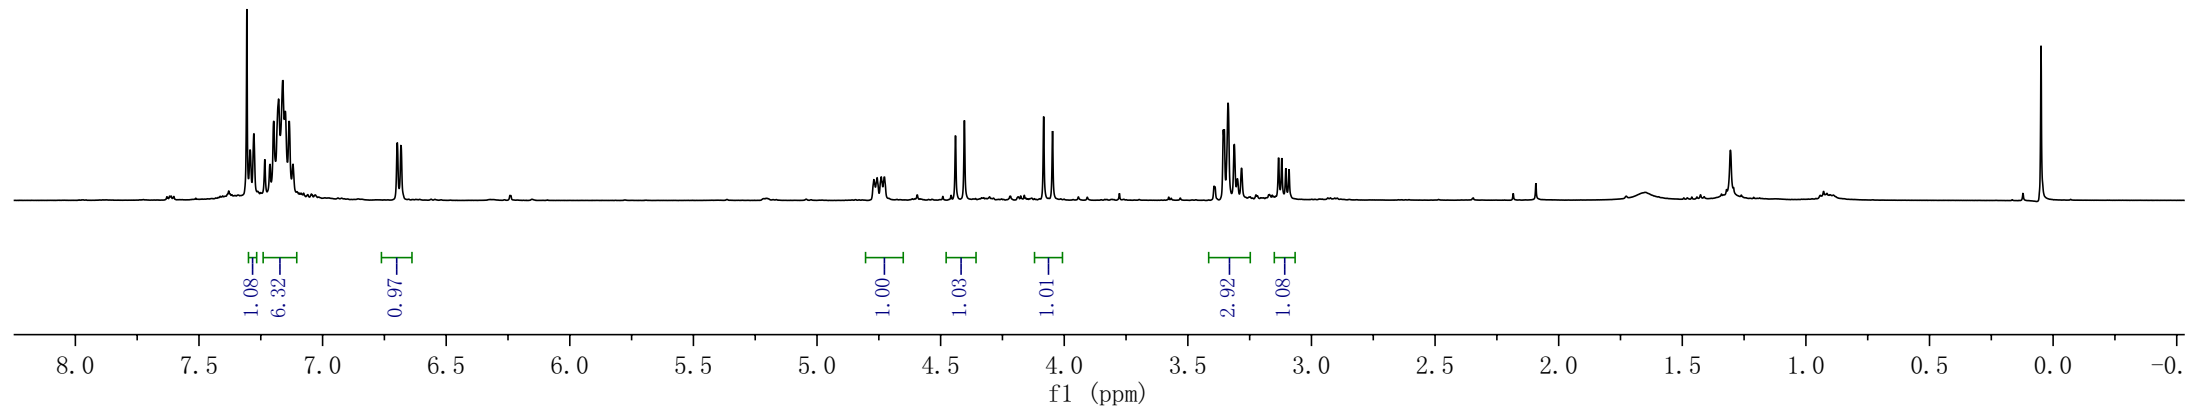

—208.02

163.18  
161.22

135.33  
134.64  
132.92  
132.90  
132.87  
131.25  
131.19  
130.34  
128.19  
127.36  
127.08  
125.89  
115.97  
115.80

77.25  
77.00  
76.75  
75.23  
72.46

—41.38

—33.59

Parameters

| Parameter      | Value                                                            |
|----------------|------------------------------------------------------------------|
| Data File Name | D:/ 文章/ paper-1-NMR/ NMR/ jkg-03-26/ JKG-20150326-1-80A/ 10/ fid |
| Title          | JKG-20150326-1-80A                                               |
| Solvent        | CDC13                                                            |

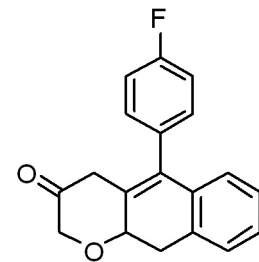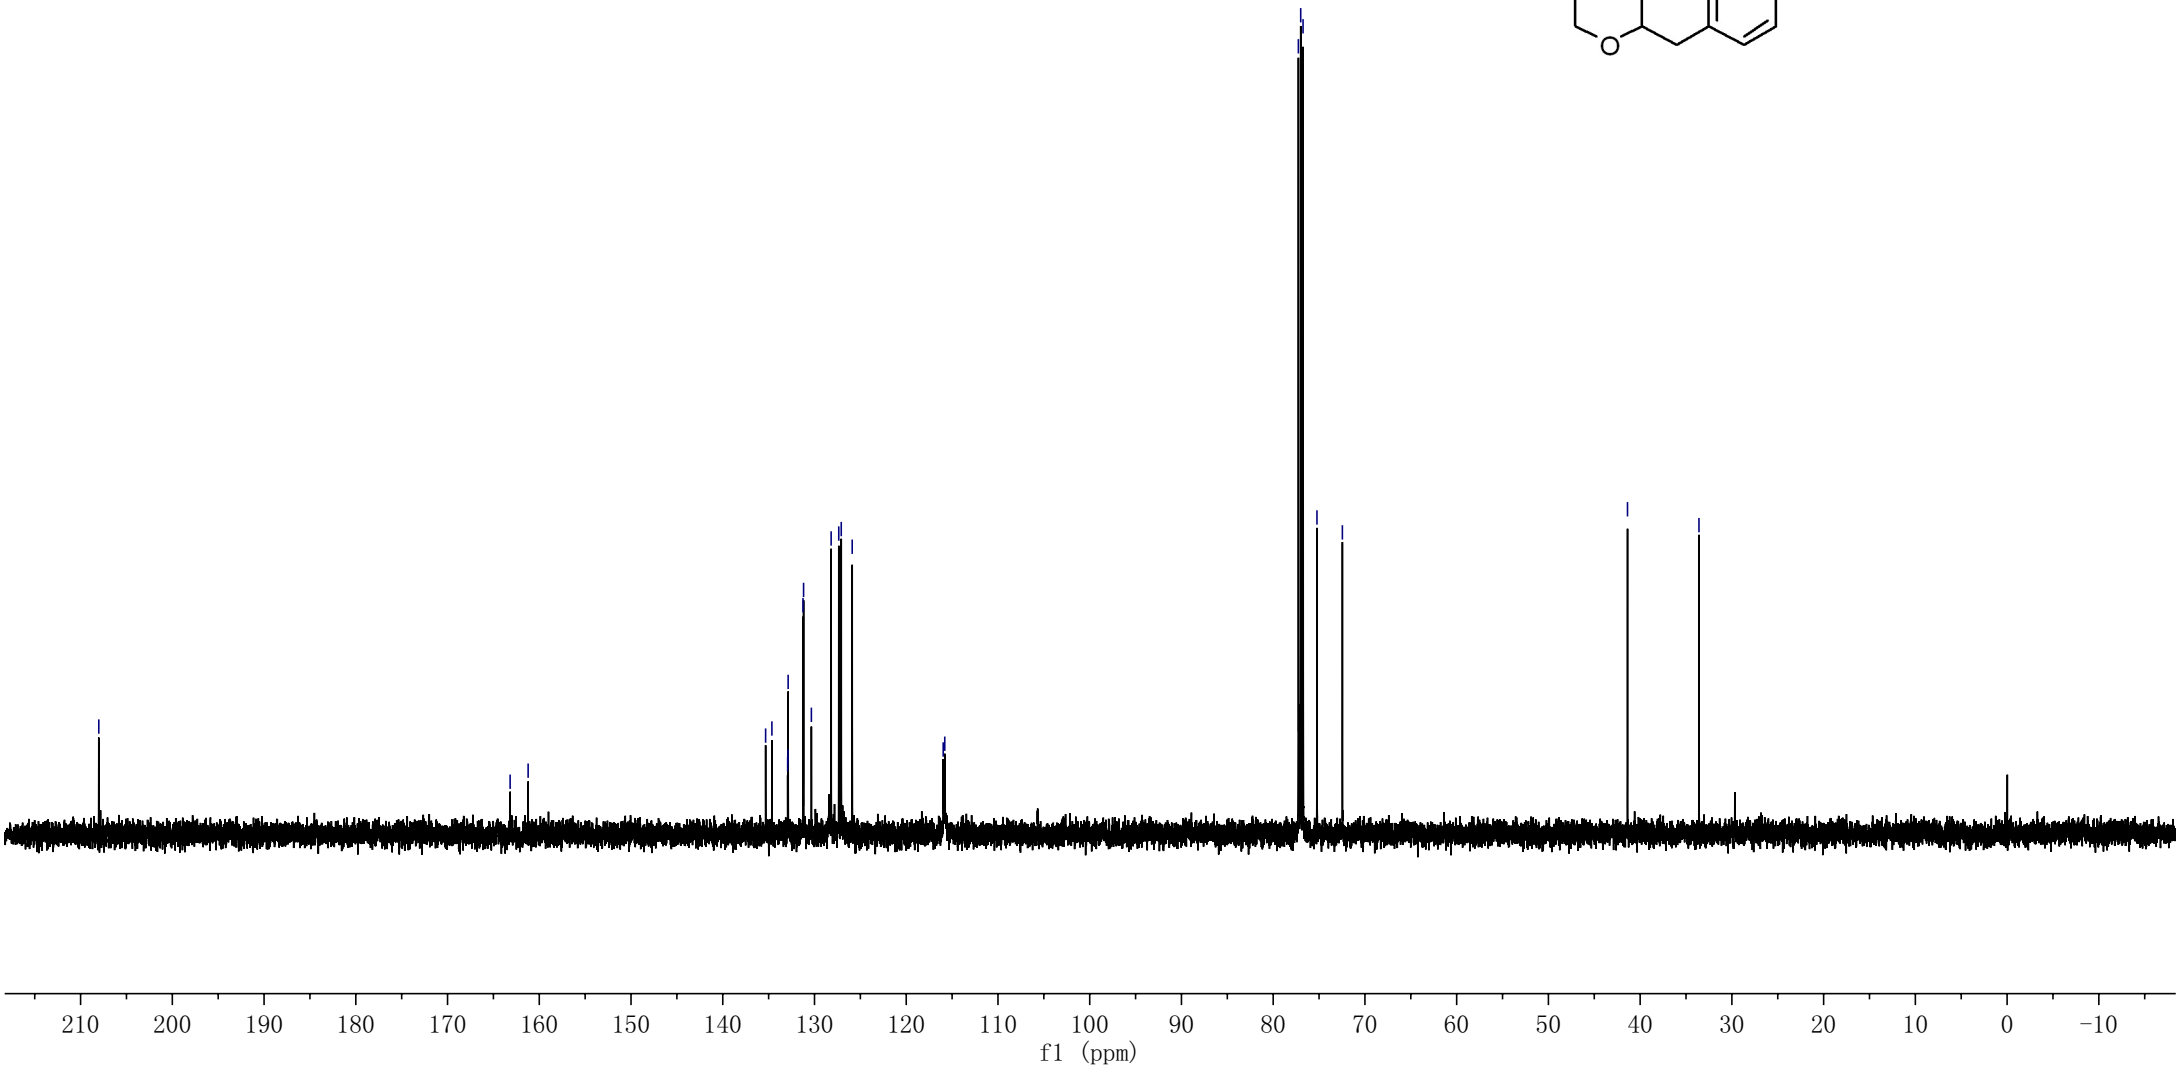

Parameters

| Parameter              | Value                                                            |
|------------------------|------------------------------------------------------------------|
| Data File Name         | D:/ 文章/ paper-1-NMR/ NMR/ jkg-03-26/ JKG-20150326-1-74A/ 10/ fid |
| Title                  | JKG-20150326-1-74A                                               |
| Solvent                | CDC13                                                            |
| Spectrometer Frequency | 500.13                                                           |
| Spectral Size          | 65536                                                            |

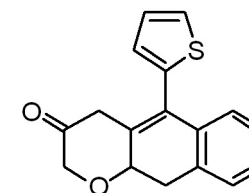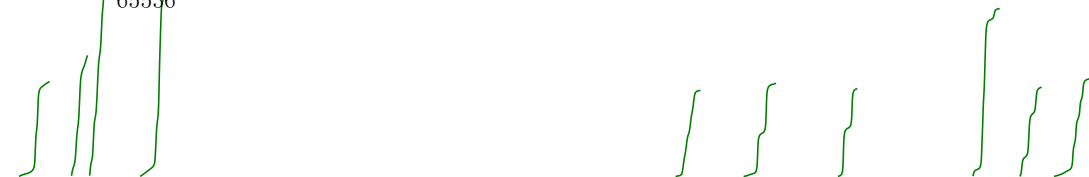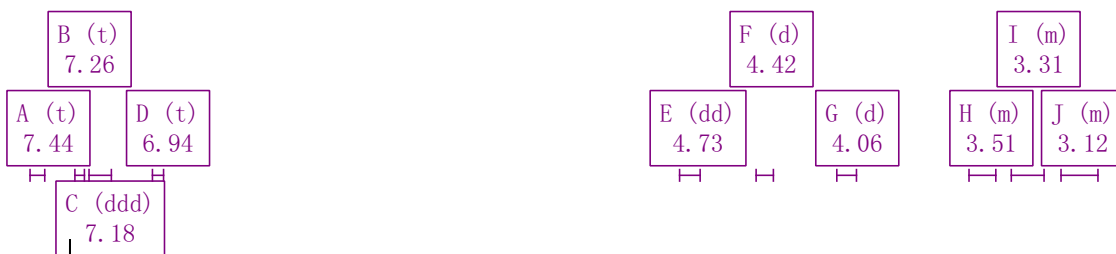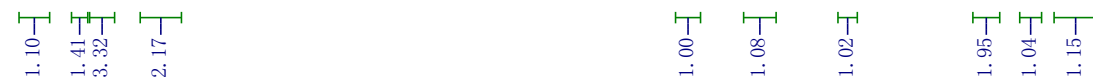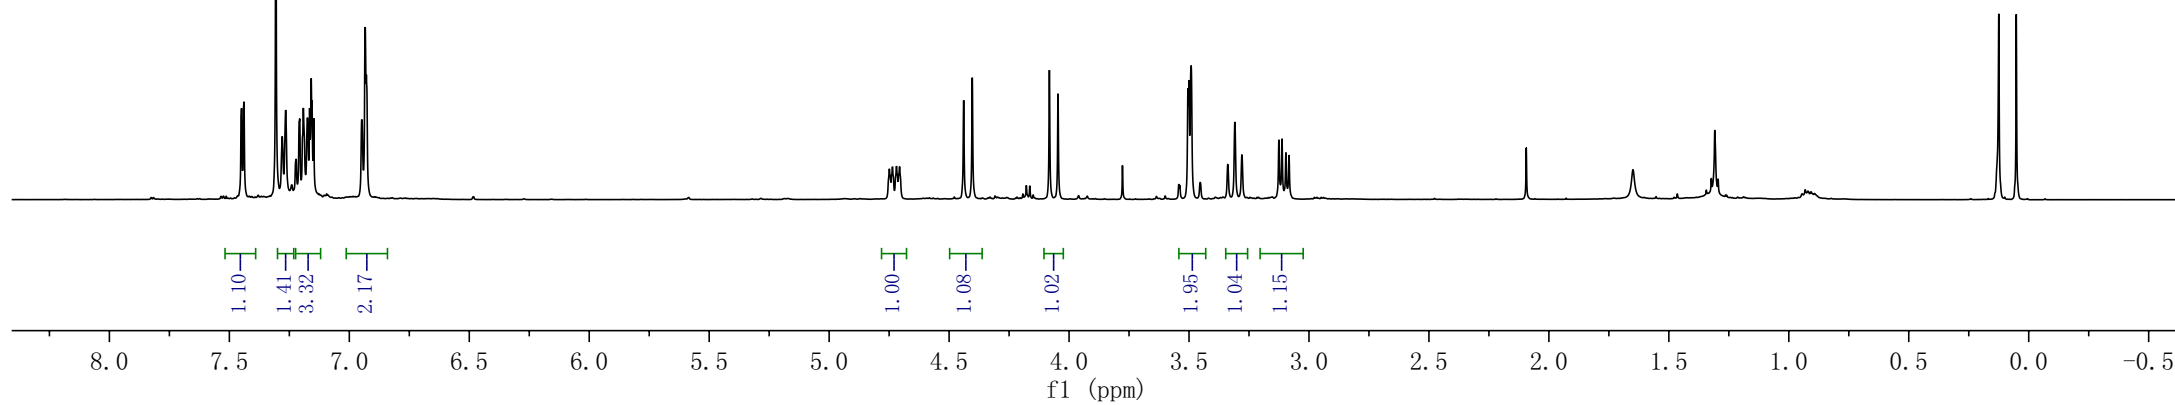

—207.73

137.14  
135.33  
133.86  
132.46  
128.42  
128.03  
127.77  
127.48  
127.28  
127.19  
126.21  
125.83

77.25  
77.00  
76.75  
75.34  
72.54

—41.60

—33.42

Parameters

Parameter Value

Data File Name D:/ 文章/ paper-1-NMR/ NMR/ jkg-03-26/ JKG-20150326-1-74A/ 11/ fid

Title JKG-20150326-1-74A

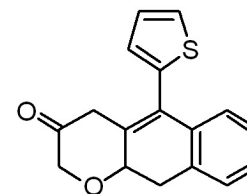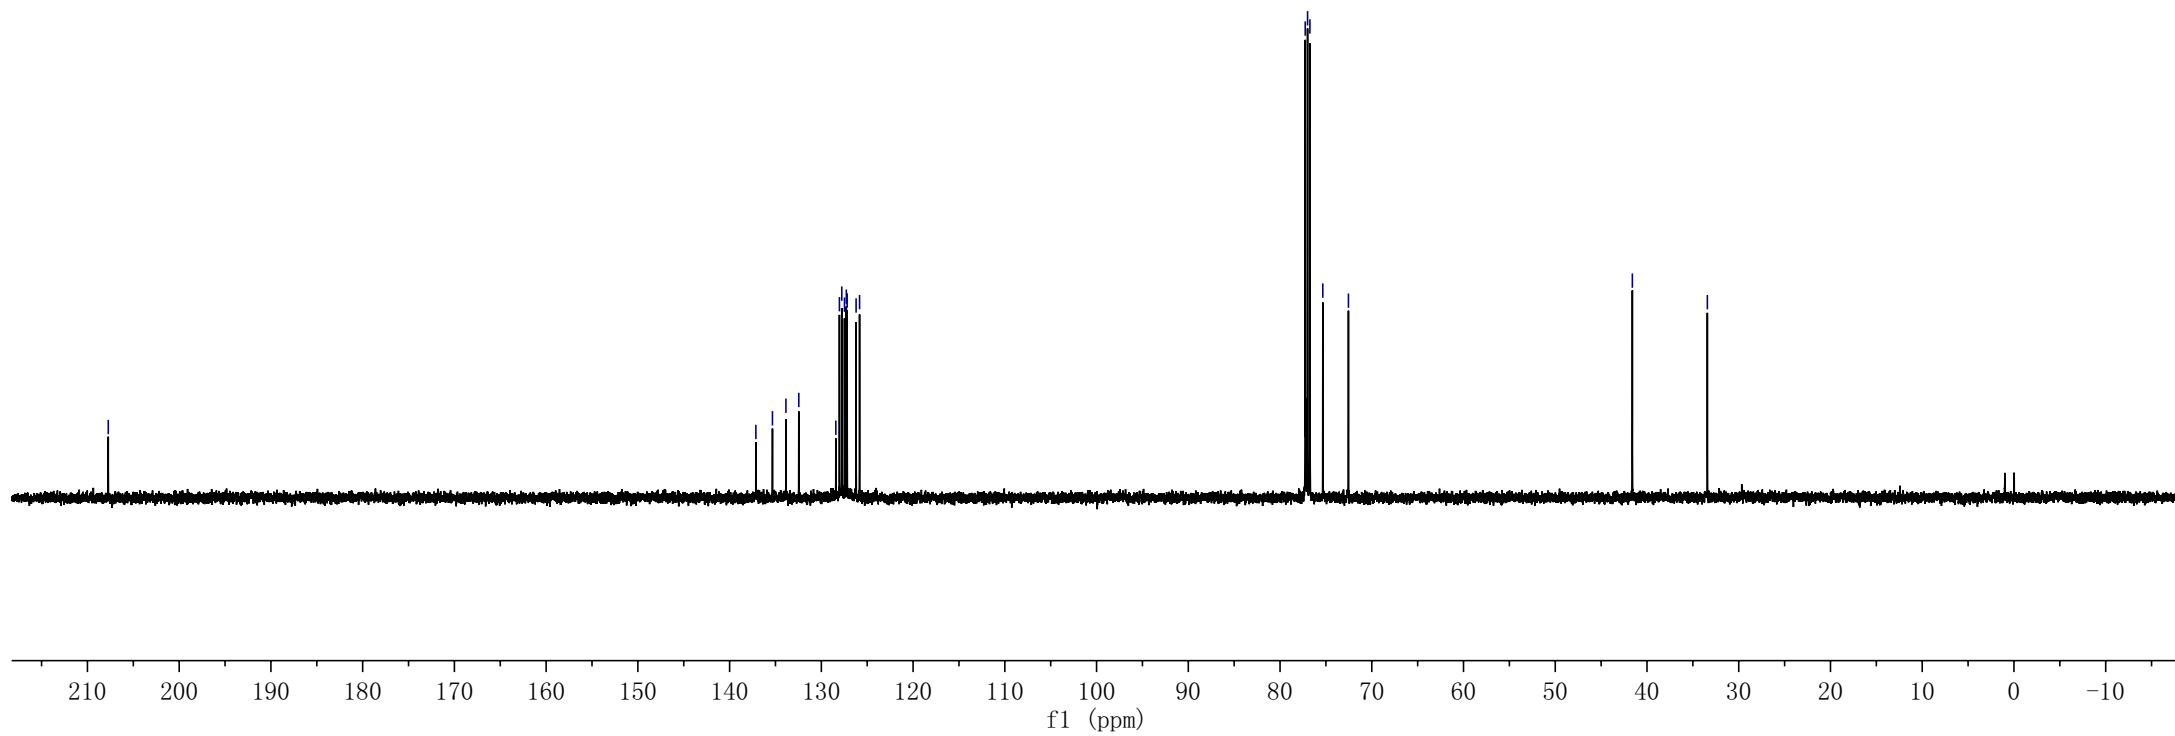

Parameters

Parameter Value  
Data File Name D:/ 文章/ paper-1-NMR/ NMR/ jkg-03-26/ JKG-20150326-1-73B/ 10/ fid  
Title JKG-20150326-1-73B  
Solvent CDCl3

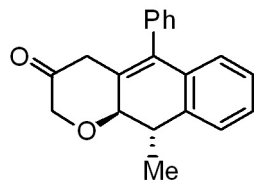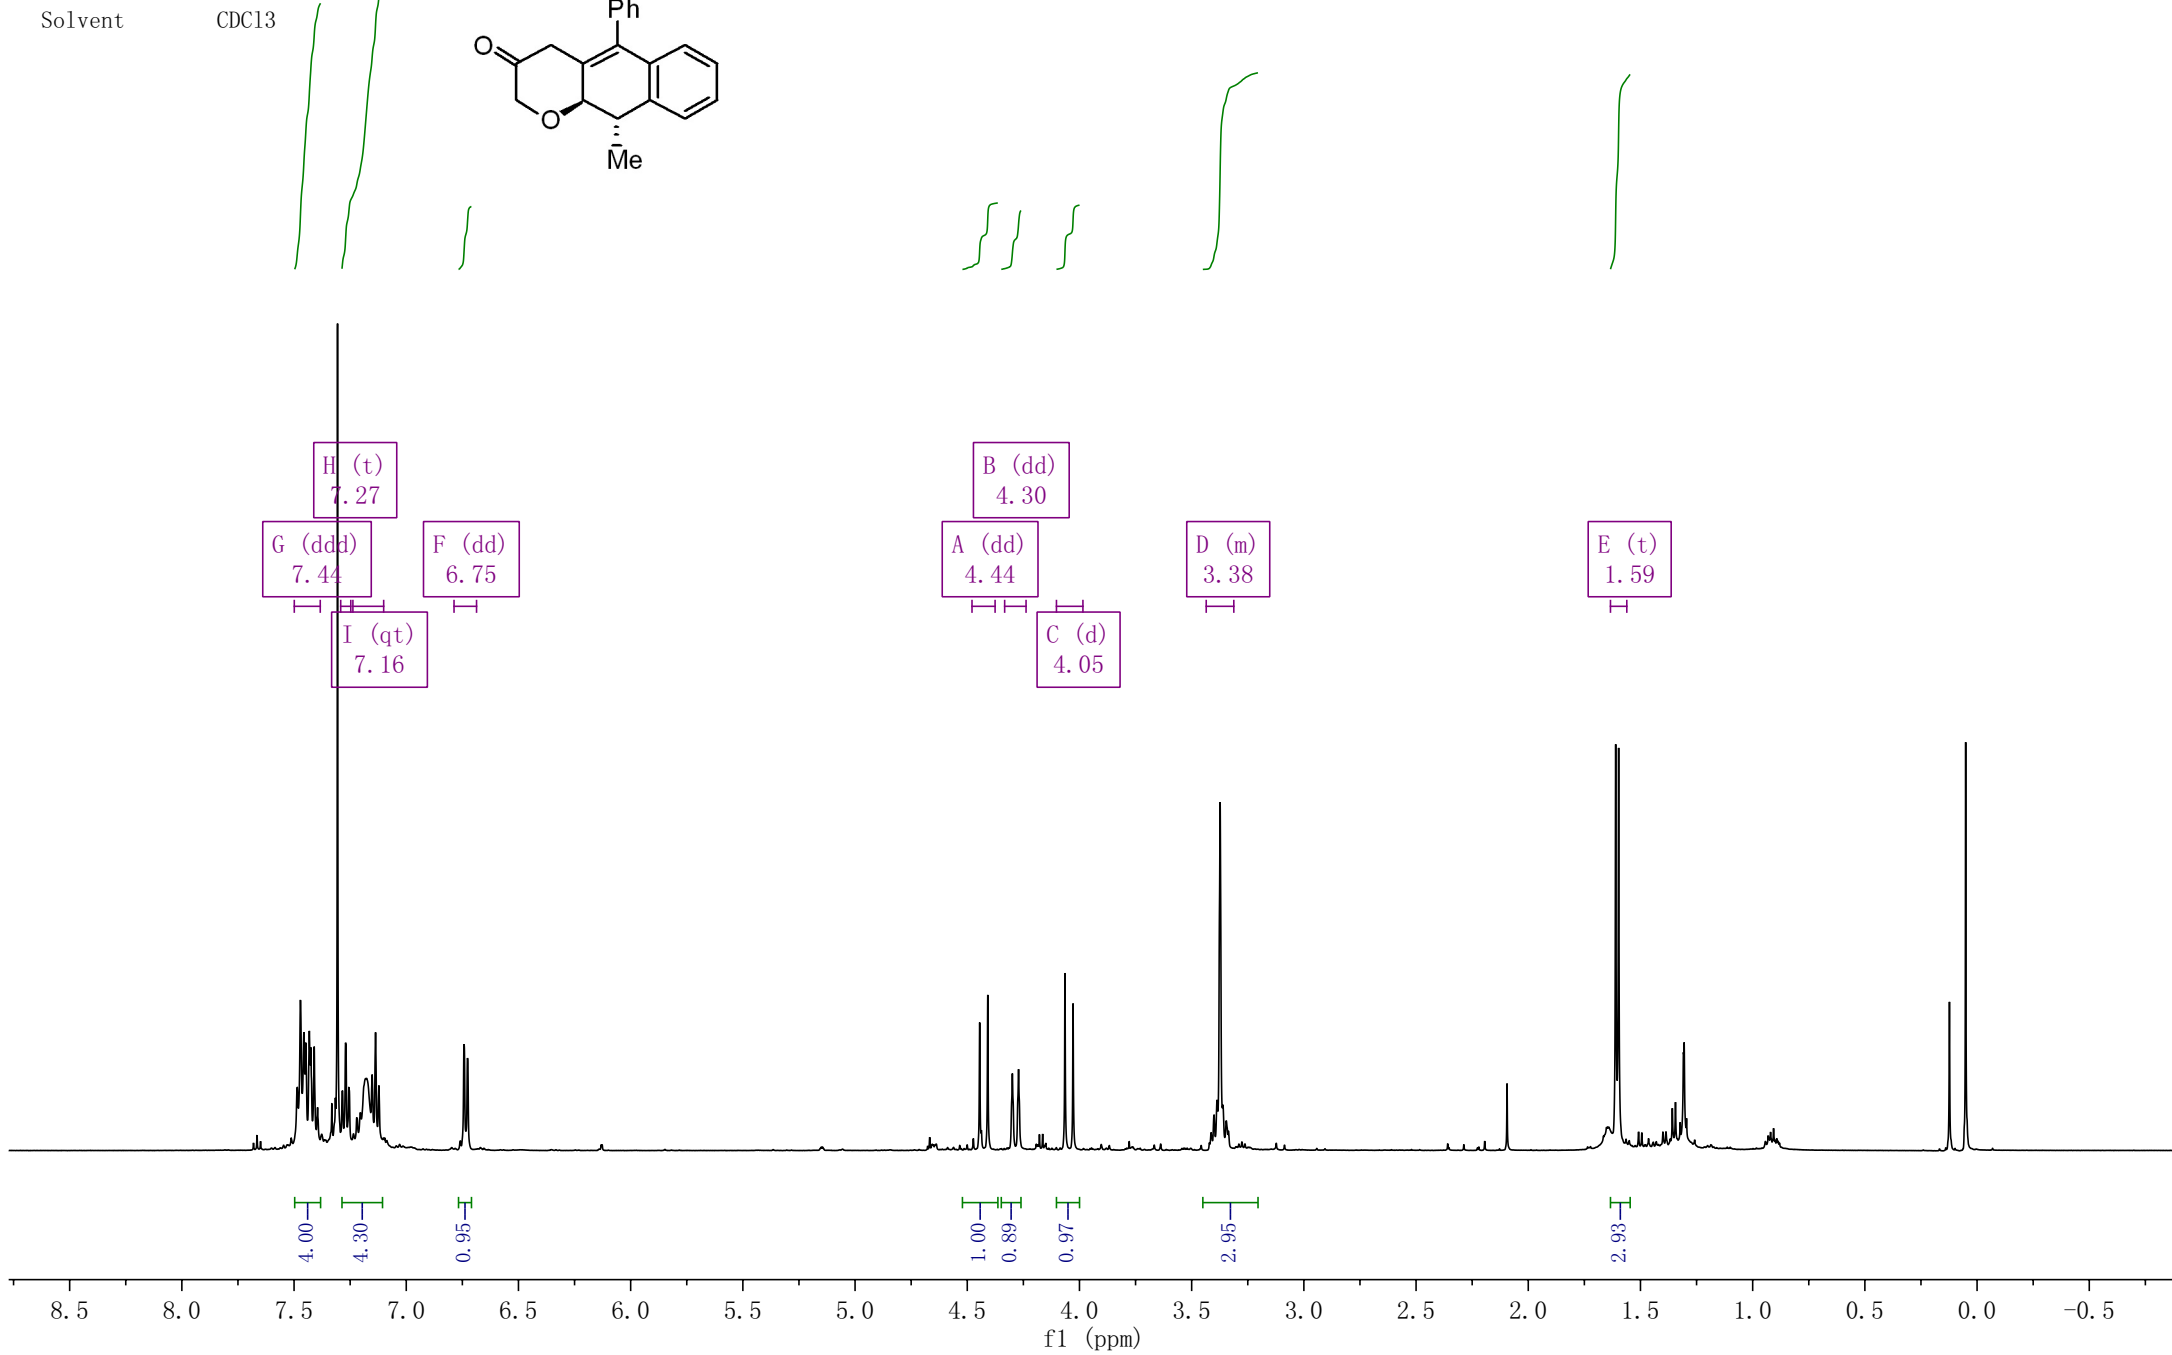

208.70

Parameters

137.40  
137.24  
135.54  
135.32  
129.68  
129.60  
128.77  
127.53  
127.45  
126.67  
126.06  
124.97  
122.85

80.03  
77.25  
77.00  
76.74  
72.05

41.55

36.04

14.06

Parameter Value

Data File Name D:/ 文章/ paper-1-NMR/ NMR/ jkg-03-26/ JKG-20150326-1-73B/ 10/ fid

Title JKG-20150326-1-73B

Solvent CDC13

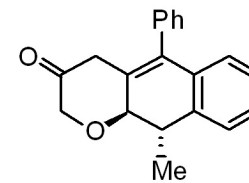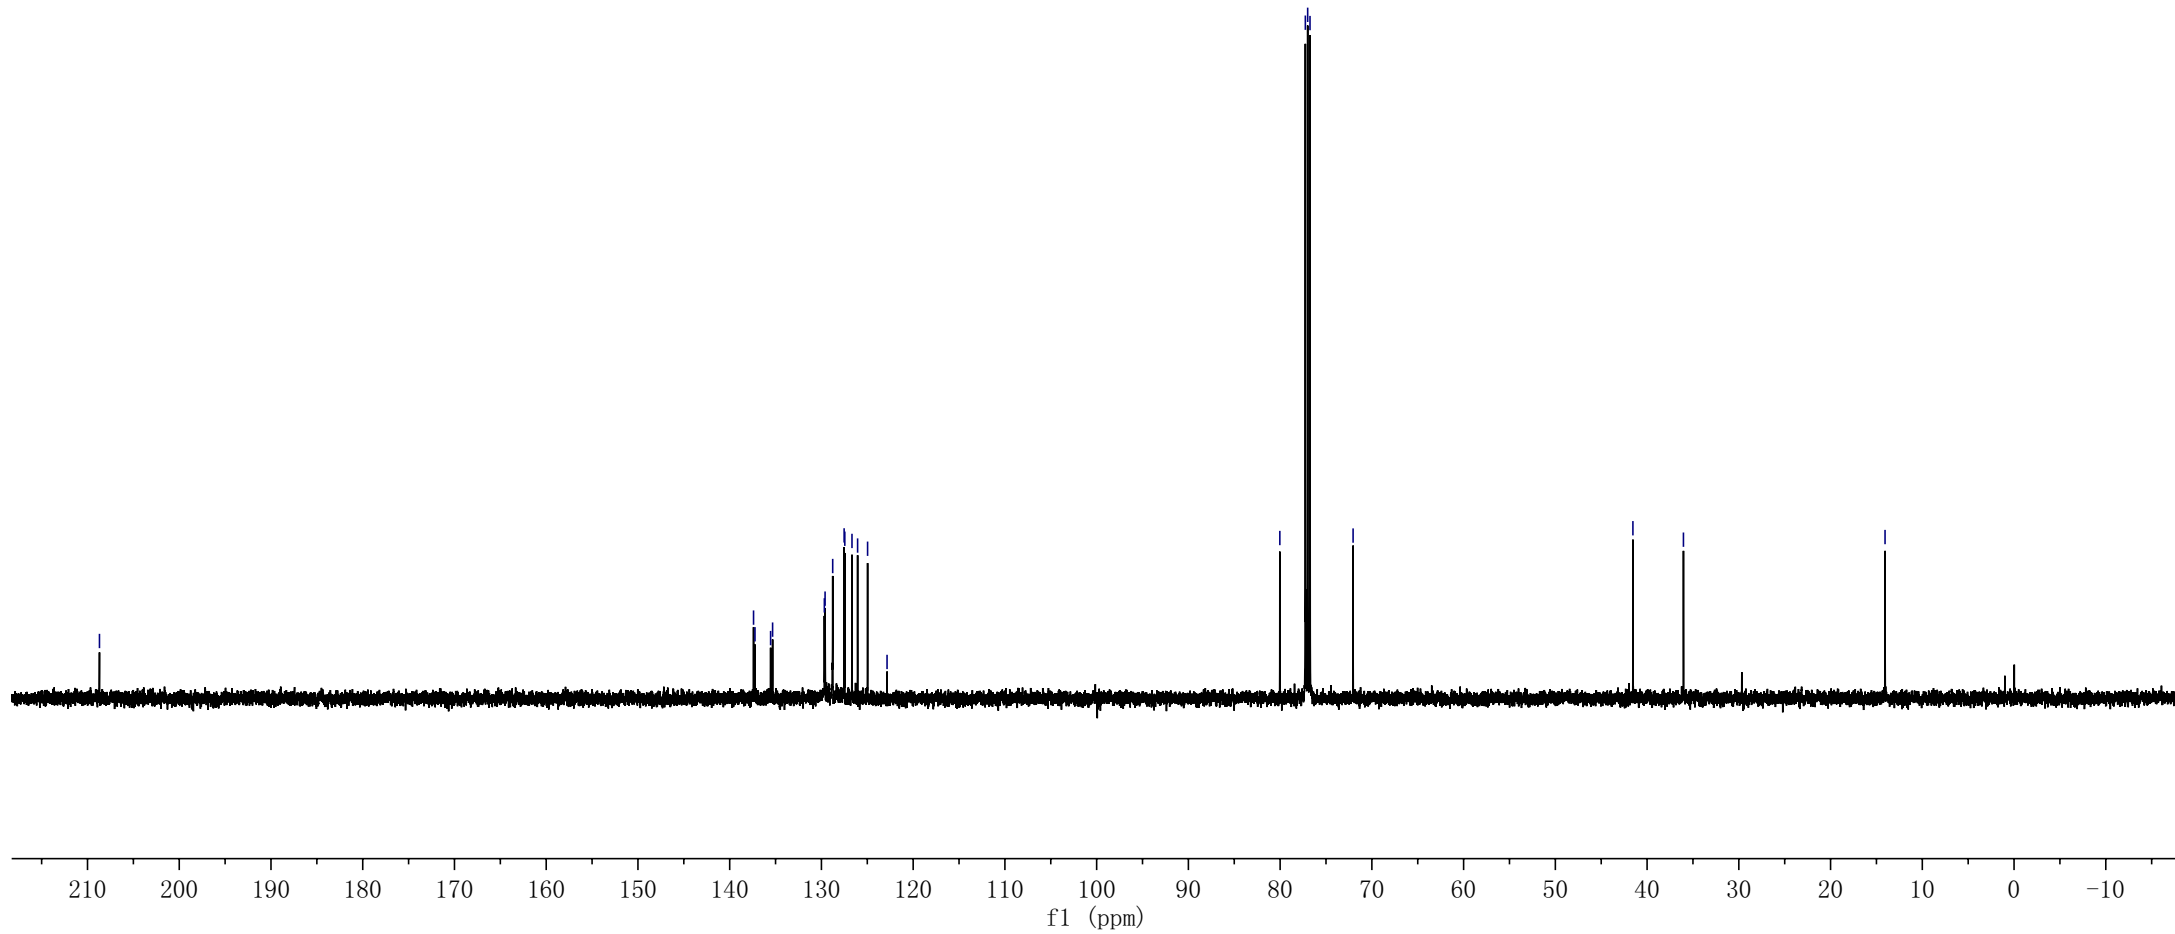

Parameters

Parameter Value  
 Data File Name D:/ 文章/ paper-1-NMR/ NMR/ jkg-03-26/ JKG-20150326-1-73B/ 11/ fid  
 Title JKG-20150326-1-73B  
 Solvent CDCl3

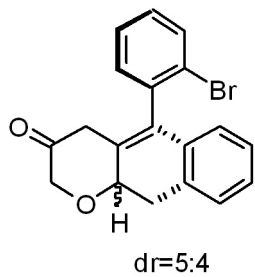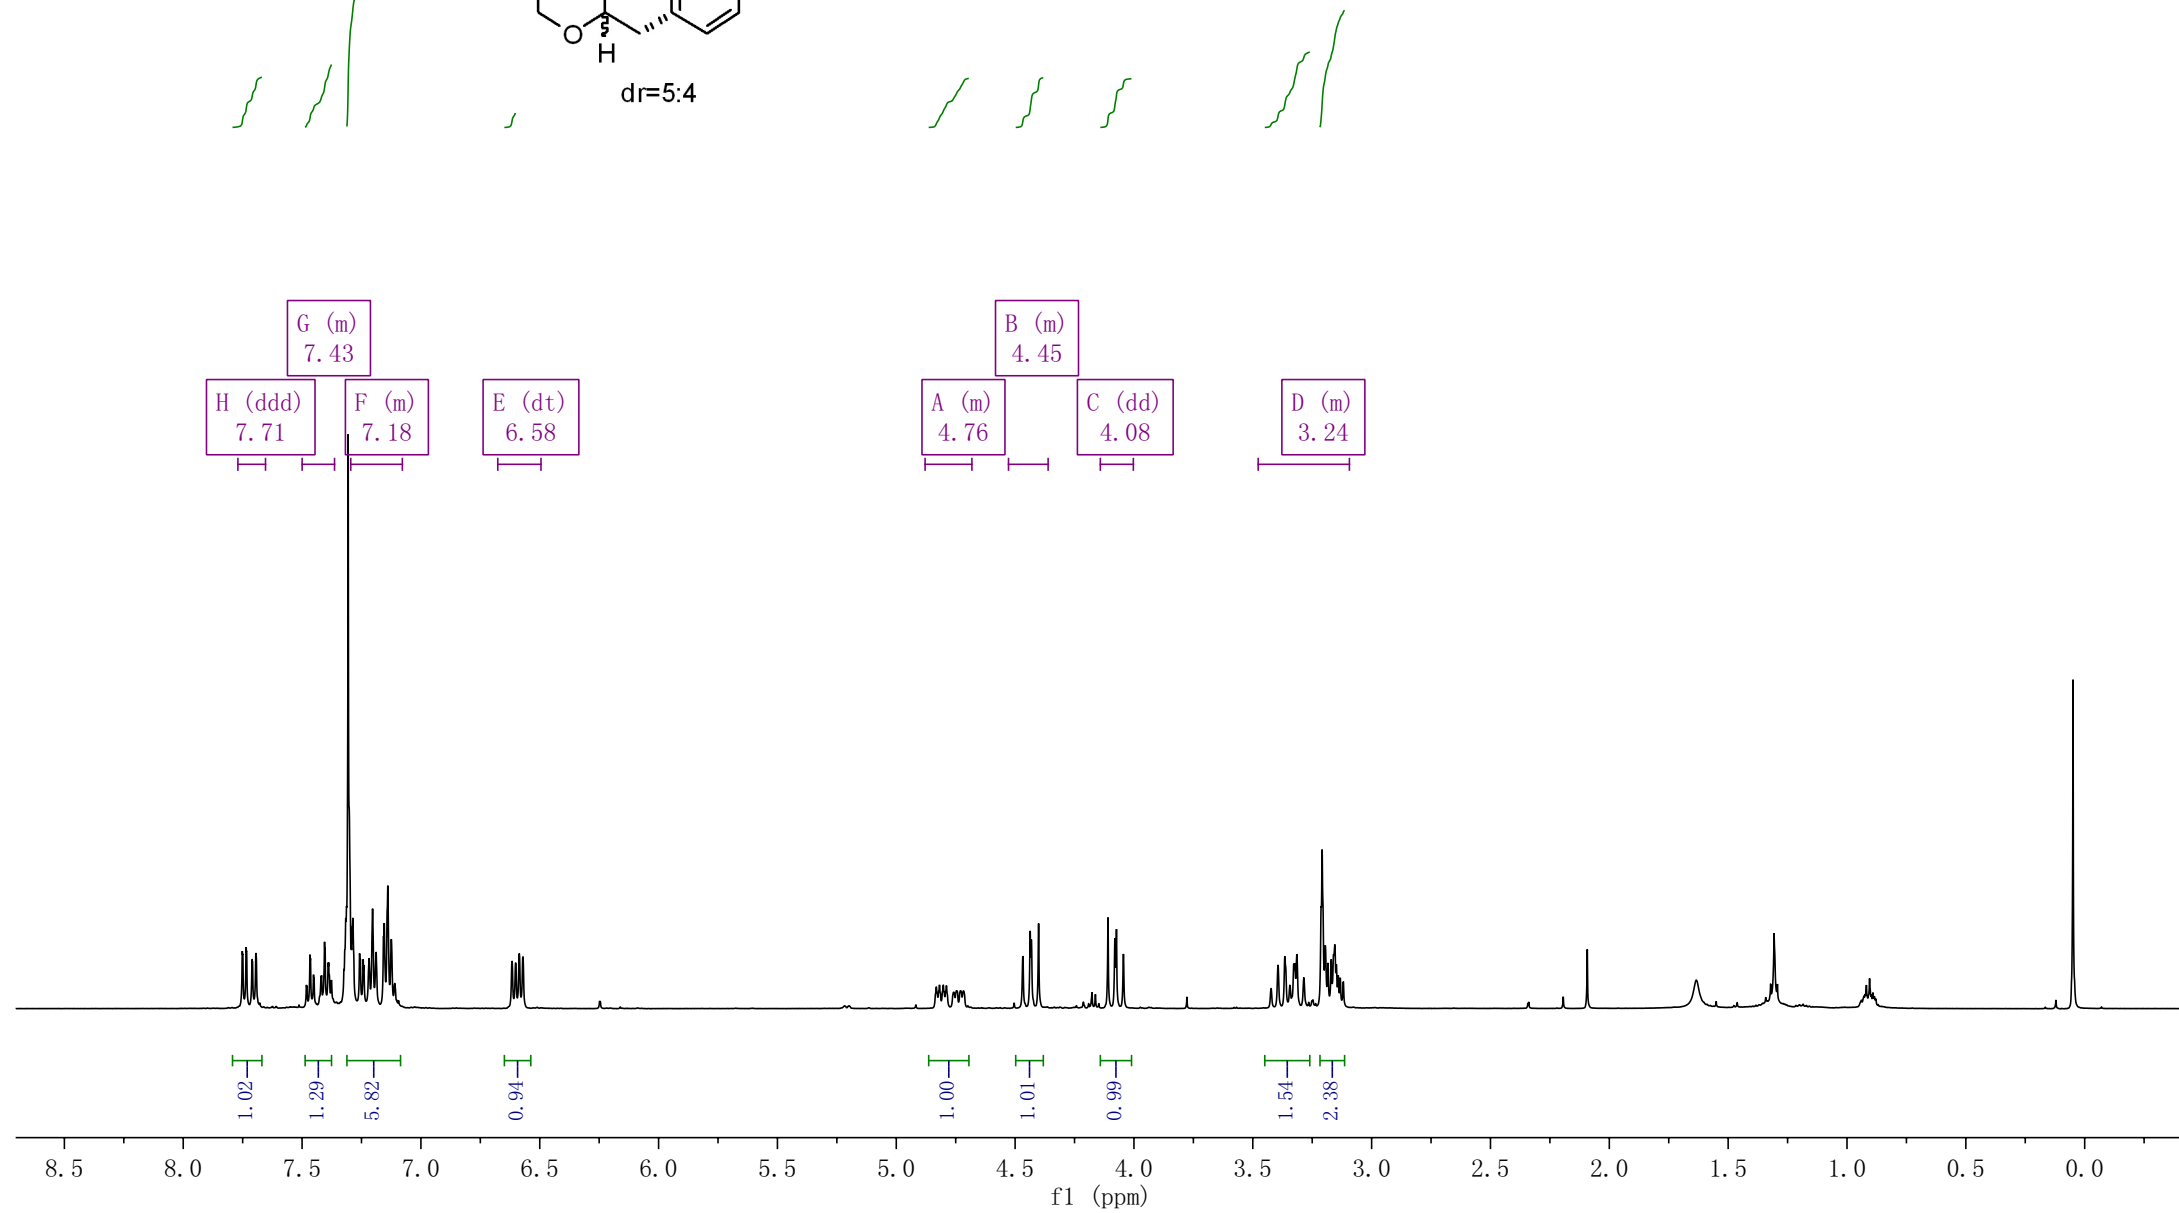

207.89  
207.43

Parameters  
137.93  
137.49  
134.59  
134.35  
134.04  
133.32  
133.01  
132.87  
132.66  
131.38  
131.15  
131.07  
130.76  
129.45  
129.42  
128.21  
128.18  
128.05  
127.75  
127.37  
127.35  
127.20  
127.13  
125.57  
124.82  
124.21  
124.01

75.13  
75.10  
72.78  
72.72

41.38  
41.06  
33.71  
33.59

Parameter

Value

Data File Name D:/ 文章/ paper-1-NMR/ NMR/ jkg-03-26/ JKG-20150326-1-75A/ 10/ fid

Title JKG-20150326-1-75A

Solvent CDC13

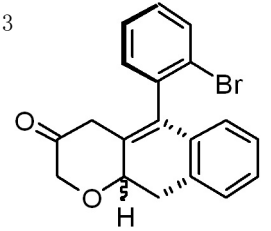

dr=5:4

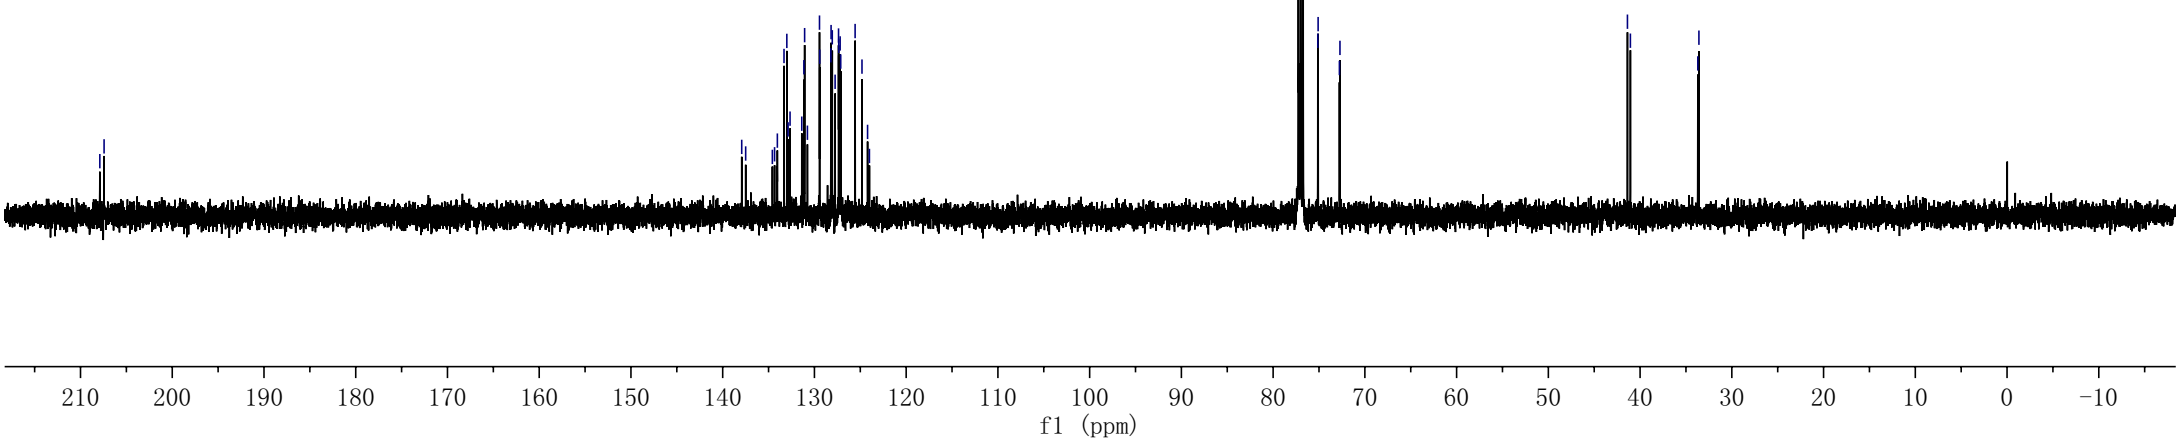



Parameters

Parameter Value  
 Data File Name D:/ 文章/ paper-1-NMR/ NMR/ jkg-03-26/ JKG-20150326-1-75A/ 11/ fid  
 Title JKG-20150326-1-75A  
 Solvent CDCl3

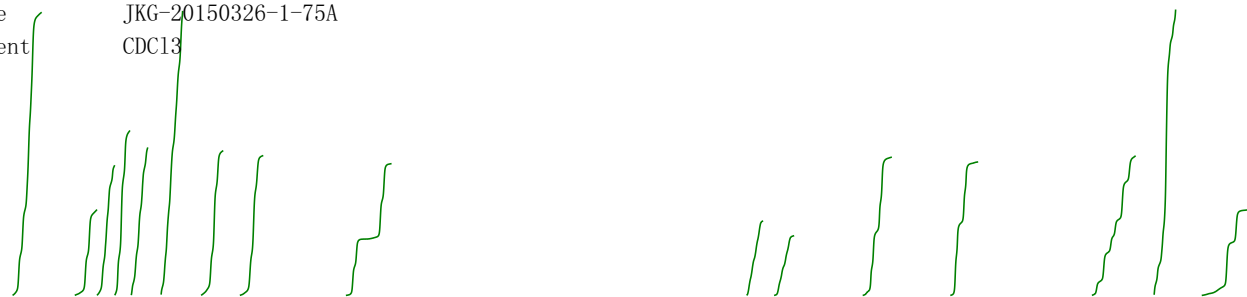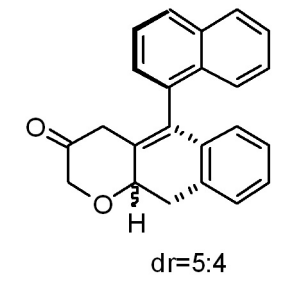

|               |                |                |               |
|---------------|----------------|----------------|---------------|
| K (m)<br>7.63 | I (m)<br>7.18  | C (dd)<br>4.10 | E (m)<br>3.26 |
| J (m)<br>7.96 | L (m)<br>7.49  | A (m)<br>4.90  | D (m)<br>3.45 |
| H (m)<br>7.03 | G (dd)<br>6.54 | B (m)<br>4.46  | F (m)<br>3.02 |
| M (m)<br>7.35 |                |                |               |

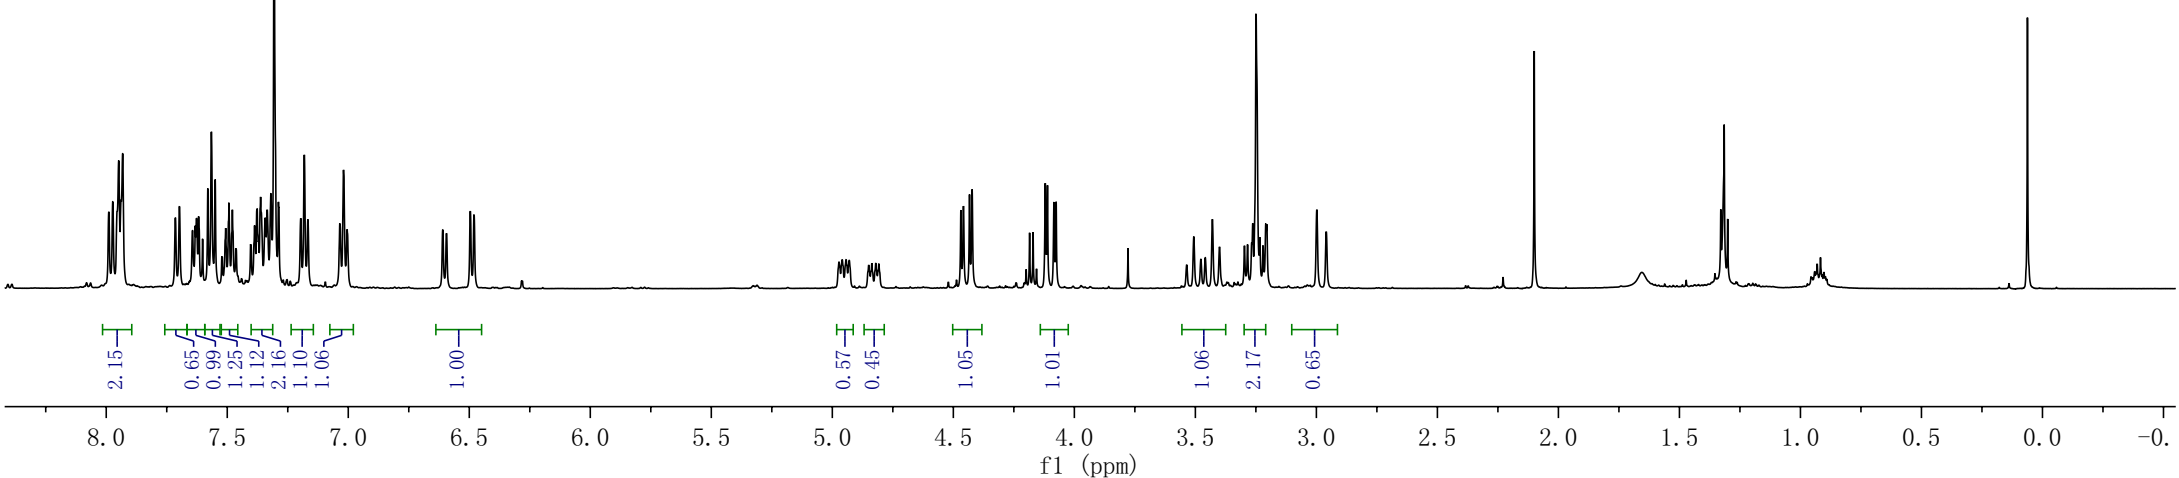

Parameter  
Data File Name D:/ 文章/ paper-1-NMR/ NMR/ jkg-03-26/ JKG-20150326-1-75A/ 11/ fid  
Title JKG-20150326-1-75A  
Solvent CDCl3

208.01  
207.83  
135.52  
134.16  
133.81  
133.14  
133.01  
133.72  
133.65  
133.56  
132.63  
132.42  
131.78  
131.63  
131.48  
131.42  
128.58  
128.48  
128.21  
128.16  
128.09  
128.03  
127.28  
127.21  
127.16  
127.04  
126.73  
126.37  
126.18  
126.06  
125.87  
125.62  
125.57  
125.14  
124.88

75.53  
75.22  
73.13  
72.77

41.39  
41.12  
34.21  
33.90

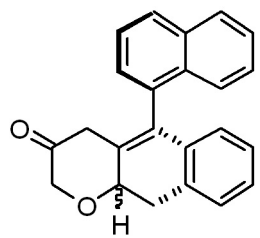

dr=5:4

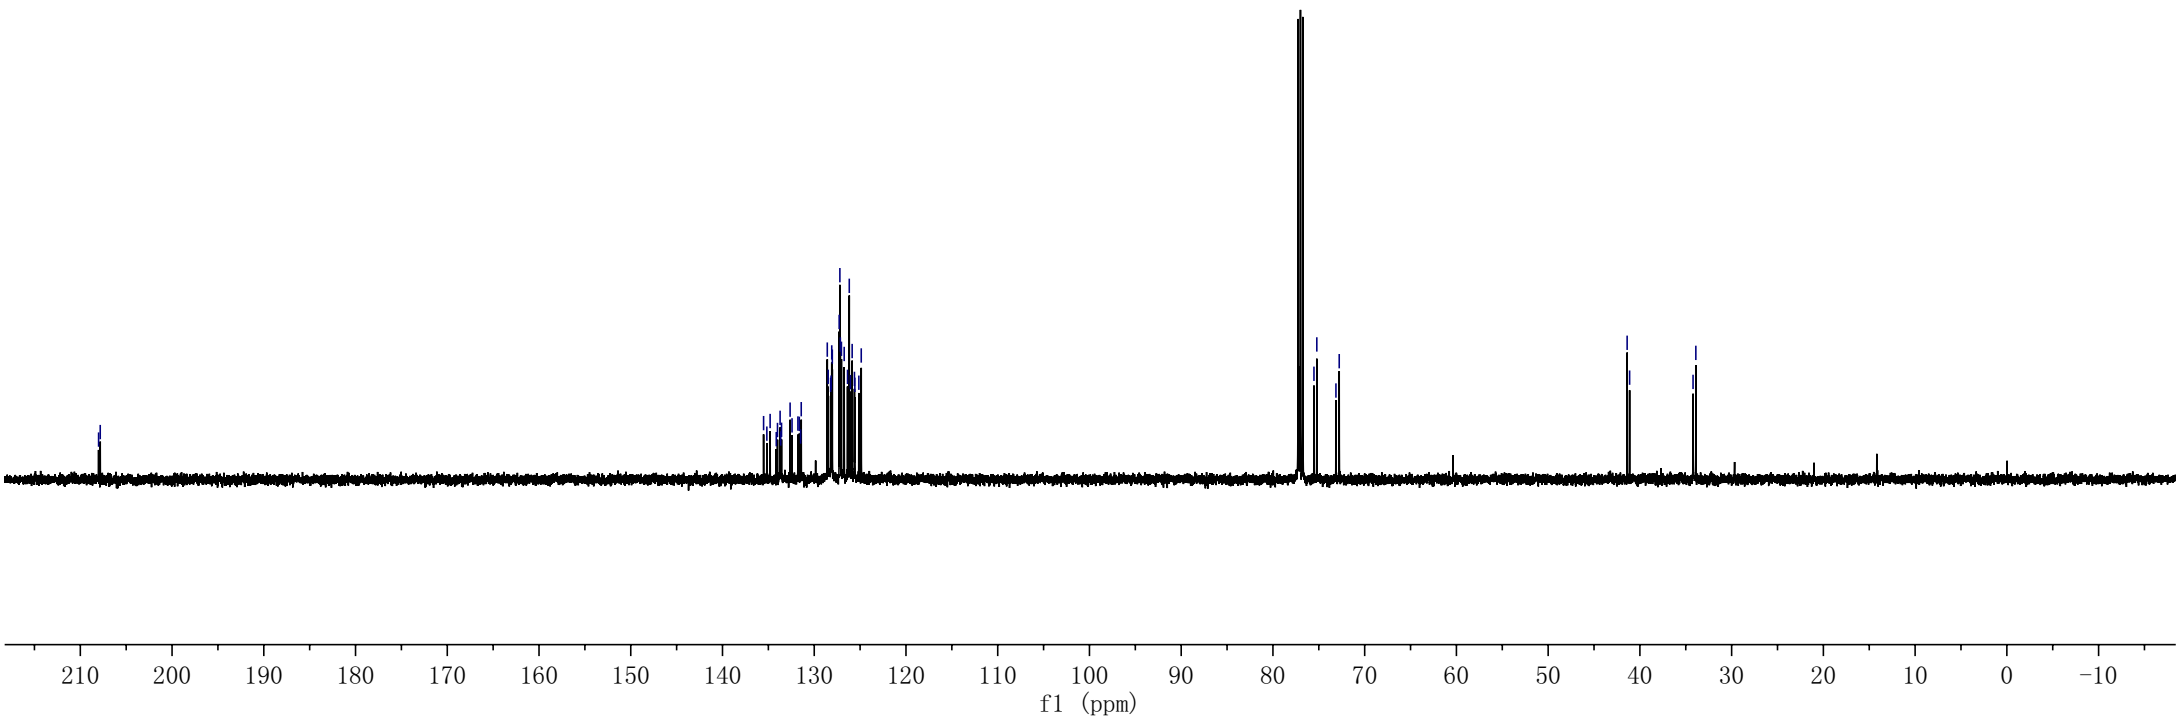

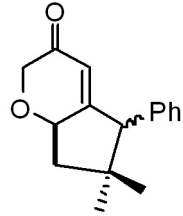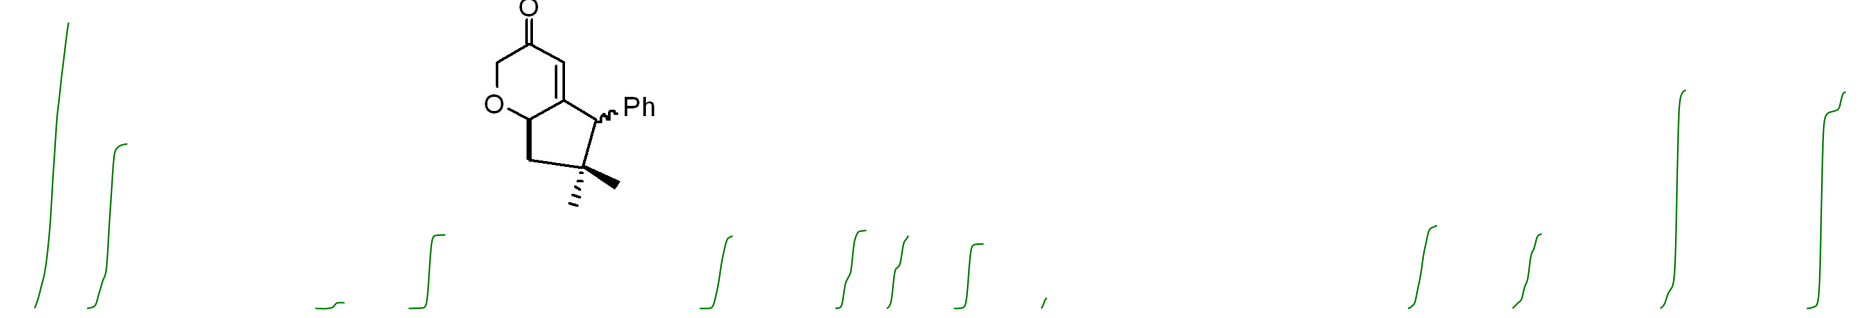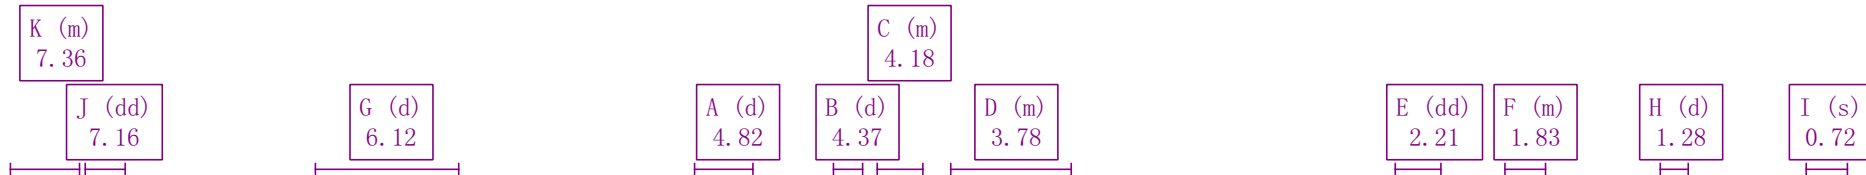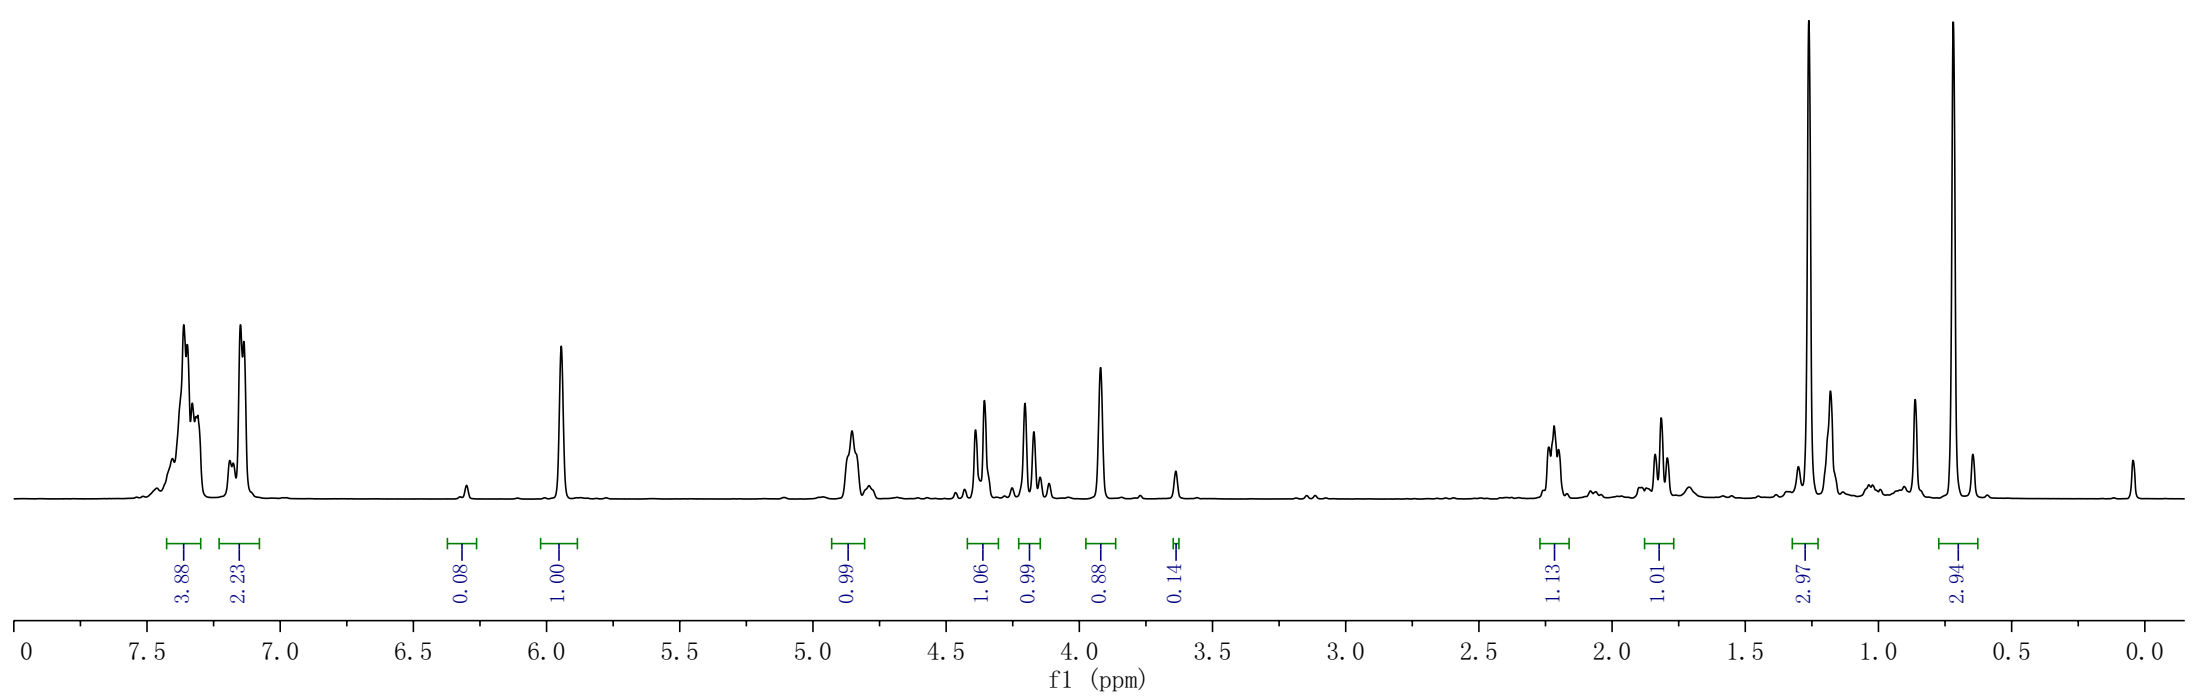

JKG-20150310-I-69P  
C13CPD CDC13 {D:2015-1} ZHL 17

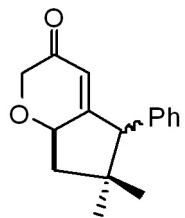

195.09  
174.17

137.67  
129.13  
128.34  
127.12  
122.30

77.98  
77.25  
77.00  
76.75  
72.87

60.08

44.73  
41.30

28.62  
24.42

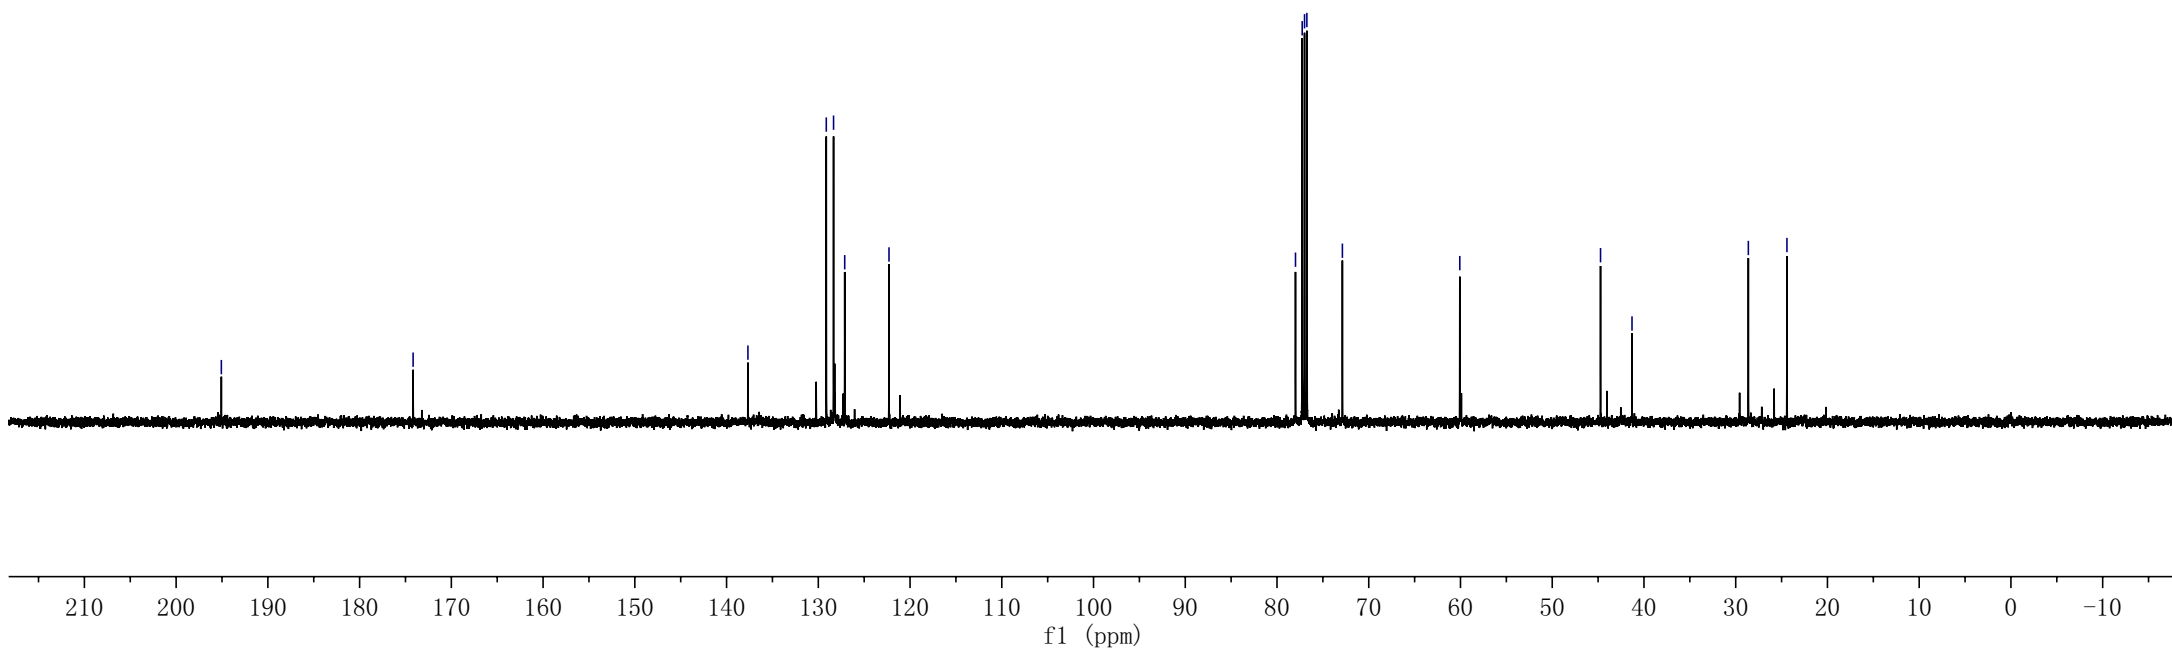

Supplement: c5cc02952j1.pdf [file c5cc02952j1.pdf]
